# Supplementary material for: Proteomic Analysis of HCC-1954 and MCF-7 Cell Lines Highlights Crosstalk between αv and β1 Integrins, E-Cadherin and HER-2
Source: Int J Mol Sci. 2022 Sep 5;23(17):10194. doi: 10.3390/ijms231710194 (PMC9456615; doi:10.3390/ijms231710194)
Supplement: Supplementary file 1 [file ijms-23-10194-s001.zip › suplementary Table 2 IJMS 02082022.xlsx]

## Sheet: 1 - HCC1954xMCF7 PTN Abundance 
							SUPLEMENTARY TABLE 2A - HCC-1954 X MCF-7 PROTEIN NORMALIZED ABUNDANCE
Accession	Peptide count	Unique peptides	Confidence score	Anova (p)	Fractions	Occurrences	Description	HCC1954 ME 1	HCC1954 ME 2	HCC1954 ME 3	HCC1954 ME 4	HCC1954 ME Medium	HCC1954 FT 1	HCC1954 FT 2	HCC1954 FT3	HCC1954 FT 4	HCC1954 FT Medium	MCF7 ME 1	MCF7 ME 2	MCF7 ME 3	MCF7 ME 4	MCF7 ME Medium	MCF7 FT 1	MCF7 FT 2	MCF7 FT 3	MCF7 FT 4	MCF7 FT Medium
P61604	1	1	4.8228	0.0029475	4	1	10 kDa heat shock protein, mitochondrial OS=Homo sapiens OX=9606 GN=HSPE1 PE=1 SV=2	14.4712	13.321	13.379	14.2411	13.8531	13.6565	0	18.8351	16.4424	12.2335	0	0	0	0	0	3.31195	4.7554	0.401037	6.17413	3.66063
P62258	10	7	80.3515	4.65e-08	1;2;3	3	14-3-3 protein epsilon OS=Homo sapiens OX=9606 GN=YWHAE PE=1 SV=1	143.087	169.31	170.677	169.356	163.107	343.799	238.869	208.742	316.245	276.913	81.2317	74.5795	83.1128	121.54	90.116	733.019	521.023	705.918	528.534	622.124
Q04917	5	3	33.156	2.13e-05	1;2	2	14-3-3 protein eta OS=Homo sapiens OX=9606 GN=YWHAH PE=1 SV=4	0	0	0	0	0	29.4262	15.0511	0	1.82123	11.5747	0	0	0	0	0	76.4181	56.6337	84.7999	55.809	68.4152
P61981	3	1	31.7518	3.15e-05	1;2	2	14-3-3 protein gamma OS=Homo sapiens OX=9606 GN=YWHAG PE=1 SV=2	0	0	0	0	0	0	59.2316	61.5743	2.80106	30.9017	0	0	0	0	0	238.573	189.278	238.365	130.455	199.168
P31947	8	3	63.2818	0.00983535	1;2;3	3	14-3-3 protein sigma OS=Homo sapiens OX=9606 GN=SFN PE=1 SV=1	81.121	61.3402	84.1164	96.8912	80.8672	256.483	462.739	267.024	72.8078	264.764	31.6028	15.5774	20.4692	44.9992	28.1621	35.3231	44.879	386.379	118.821	146.35
P27348	8	5	65.9227	5.98e-05	1;2;3	3	14-3-3 protein theta OS=Homo sapiens OX=9606 GN=YWHAQ PE=1 SV=1	395.098	152.911	588.013	706.037	460.515	141.056	63.6615	178.258	35.1504	104.532	36.184	41.6221	33.4727	14.8422	31.5303	371.444	456.711	289.324	449.15	391.657
P63104	17	10	154.861	5.84e-10	1;2;3;4;6;7	6	14-3-3 protein zeta/delta OS=Homo sapiens OX=9606 GN=YWHAZ PE=1 SV=1	456.094	414.792	392.816	355.963	404.916	1809.33	1878.3	1248.37	1339.25	1568.82	41.6074	52.4261	53.1497	49.8785	49.2654	639.982	1443.88	735.618	1306.03	1031.38
Q16698	4	1	30.5373	0.00199487	3	1	2,4-dienoyl-CoA reductase, mitochondrial OS=Homo sapiens OX=9606 GN=DECR1 PE=1 SV=1	58.7635	49.0292	59.8078	48.3003	53.9752	68.5021	75.8203	104.23	69.6349	79.5467	142.351	157.65	133.739	451.682	221.355	94.7312	113.531	57.7878	124.327	97.5943
P17980	5	3	24.2001	1.4e-05	1;2;3	3	26S proteasome regulatory subunit 6A OS=Homo sapiens OX=9606 GN=PSMC3 PE=1 SV=3	15686.4	15837.5	16872.3	18370	16691.6	0.136427	97.8207	3.18653	51.909	38.2632	43040.3	31999.5	34310.9	37739.6	36772.6	8.26944	105.852	0.377699	113.183	56.9205
Q99714	2	2	11.8506	0.00488047	1;2	2	3-hydroxyacyl-CoA dehydrogenase type-2 OS=Homo sapiens OX=9606 GN=HSD17B10 PE=1 SV=3	18.764	23.5239	77.93	35.5545	38.9431	0	0	0	0	0	0	0	0	0	0	319.02	0	142.304	1.64388	115.742
P09110	2	2	12.6235	0.00329355	2	1	3-ketoacyl-CoA thiolase, peroxisomal OS=Homo sapiens OX=9606 GN=ACAA1 PE=1 SV=2	0	0	0	0	0	0	0	0	0	0	0	0	0	0	0	0	97.019	52.0119	84.3188	58.3374
P62280	1	1	7.7583	0.00983679	2	1	40S ribosomal protein S11 OS=Homo sapiens OX=9606 GN=RPS11 PE=1 SV=3	0	0	0	0	0	63.2408	132.929	16.3614	204.95	104.37	0	0	0	0	0	0.285024	4.44518	66.1043	149.297	55.033
P62277	3	2	27.1204	5.18e-06	2;3	2	40S ribosomal protein S13 OS=Homo sapiens OX=9606 GN=RPS13 PE=1 SV=2	0	0	0	0	0	3.99879	100.389	69.5437	75.8436	62.4439	0	0	0	0	0	14.2232	51.6736	42.4962	40.7539	37.2867
P39019	5	4	25.2332	0.0356693	4	1	40S ribosomal protein S19 OS=Homo sapiens OX=9606 GN=RPS19 PE=1 SV=2	186.591	178.77	191.826	201.994	189.795	135.418	152.55	192.363	170.832	162.791	132.684	138.837	134.888	165.97	143.095	71.011	195.229	108.002	51.3344	106.394
P15880	3	2	21.43	0.000253898	3	1	40S ribosomal protein S2 OS=Homo sapiens OX=9606 GN=RPS2 PE=1 SV=2	7.19003	9.42136	6.33308	9.71275	8.16431	14.3239	105.613	63.0122	104.562	71.8778	3.19985	3.76194	7.11441	1.33649	3.85317	55.5532	109.086	15.2222	96.6272	69.1221
P60866	4	2	48.5208	1.31e-08	3	1	40S ribosomal protein S20 OS=Homo sapiens OX=9606 GN=RPS20 PE=1 SV=1	259.093	255.244	266.246	262.956	260.885	50.1413	58.1772	69.9479	80.0838	64.5875	332.56	326.935	343.041	371.038	343.393	35.0407	29.1377	12.5236	29.2415	26.4859
P62854;Q5JNZ5	3	3	31.7368	0.0223809	2;5	2	40S ribosomal protein S26 OS=Homo sapiens OX=9606 GN=RPS26 PE=1 SV=3	0	0	0	0	0	124.984	249.693	0	682.994	264.418	0.988759	1.09676	1.28371	51.1378	13.6268	321.14	337.161	105.79	426.389	297.62
P42677	1	1	7.0604	2.04e-06	2	1	40S ribosomal protein S27 OS=Homo sapiens OX=9606 GN=RPS27 PE=1 SV=3	35.3402	166.301	339.779	310.861	213.07	0	0	0	0	0	0	0	0	0	0	0	0	0	0	0
P23396	1	1	5.2322	0.00255512	3	1	40S ribosomal protein S3 OS=Homo sapiens OX=9606 GN=RPS3 PE=1 SV=2	2.78193	2.60324	2.08509	2.87633	2.58665	44.9239	5.75378	6.40946	5.54261	15.6574	0	0	0	0	0	121.628	3.83495	75.3229	3.77587	51.1404
P62701	5	2	43.0658	0.00987344	4;5	2	40S ribosomal protein S4, X isoform OS=Homo sapiens OX=9606 GN=RPS4X PE=1 SV=2	0	0	0	0	0	0	0	0	0	0	0	0	0	0	0	2.11993	50.6108	100.752	132.048	71.3827
P62753	1	1	7.9735	1.34e-11	1;2	2	40S ribosomal protein S6 OS=Homo sapiens OX=9606 GN=RPS6 PE=1 SV=1	0	0	0	1.43896	0.359739	403.062	286.609	401.89	433.457	381.255	0	0	0	0	0	822.04	318.962	373.893	303.197	454.523
P62081	7	6	49.0271	3.99e-06	1;2;3;4	4	40S ribosomal protein S7 OS=Homo sapiens OX=9606 GN=RPS7 PE=1 SV=1	42.3712	41.7664	45.3434	46.6284	44.0273	302.096	192.855	412.726	222.093	282.442	69.3789	70.3991	62.3925	41.3174	60.872	210.269	564.842	363.86	172.922	327.973
P62241	5	3	45.0154	2.03e-07	3	1	40S ribosomal protein S8 OS=Homo sapiens OX=9606 GN=RPS8 PE=1 SV=2	19.1117	18.3025	12.9439	17.939	17.0743	95.9339	305.362	207.843	285.659	223.699	29.1761	18.8485	20.8277	8.58478	19.3593	541.921	412.976	708.478	249.926	478.325
P08865	4	4	25.2991	4.5e-08	1;2;3	3	40S ribosomal protein SA OS=Homo sapiens OX=9606 GN=RPSA PE=1 SV=4	13.2725	12.5175	12.3786	14.6637	13.208	451.066	386.326	351.943	351.935	385.317	273.251	321.835	250.36	401.765	311.803	916.466	593.997	173.598	729.619	603.42
Q9BRK5	2	1	9.4804	6.64e-06	3	1	45 kDa calcium-binding protein OS=Homo sapiens OX=9606 GN=SDF4 PE=1 SV=1	23.72	20.2685	19.1201	16.0568	19.7913	21.3538	9.77668	9.29692	10.0498	12.6193	0	0	0	0	0	15.4976	5.46413	0.944249	7.56753	7.36839
P80404	7	6	63.4709	3.34e-05	2;3	2	4-aminobutyrate aminotransferase, mitochondrial OS=Homo sapiens OX=9606 GN=ABAT PE=1 SV=3	366.293	316.485	325.707	342.118	337.651	53.4518	127.423	124.817	121.05	106.685	629.9	466.622	512.15	537.414	536.522	765.621	293.988	987.463	556.745	650.954
P08195	15	9	129.191	6.22e-06	2;3	2	4F2 cell-surface antigen heavy chain OS=Homo sapiens OX=9606 GN=SLC3A2 PE=1 SV=3	412.218	407.614	417.216	424.968	415.504	778.387	1115.96	950.906	717.225	890.62	101.985	133.594	123.211	156.934	128.931	506.46	607.263	228.734	737.582	520.01
P10809;P18687;P19226	33	29	317.484	4.97e-06	1;2;3;4;5;6;7;8;9	9	60 kDa heat shock protein, mitochondrial OS=Homo sapiens OX=9606 GN=HSPD1 PE=1 SV=2	1754.85	1864.59	1876.76	1543.93	1760.03	2781.16	2398.11	3119.58	3694.84	2998.42	3019.66	2612.53	2399.45	2236.86	2567.12	11779.5	6513.91	10043	5134.49	8367.74
P05388	2	1	12.212	2.23e-06	1;2	2	60S acidic ribosomal protein P0 OS=Homo sapiens OX=9606 GN=RPLP0 PE=1 SV=1	1.36863	0.0821334	0.586695	0.068004	0.526365	103.354	112.983	86.7441	22.5083	81.3974	0	0	0	0	0	150.106	6.39987	136.2	95.6954	97.1005
P05387	5	3	50.9753	3.35e-07	1;2	2	60S acidic ribosomal protein P2 OS=Homo sapiens OX=9606 GN=RPLP2 PE=1 SV=1	0	0	0	0	0	355.392	117.915	139.622	385.146	249.519	0	0	0	0	0	1322.57	492.506	470.43	487.411	693.23
P27635;Q96L21	3	2	16.6485	0.000414023	4	1	60S ribosomal protein L10 OS=Homo sapiens OX=9606 GN=RPL10 PE=1 SV=4	0	0	0	0	0	15.4138	147.585	57.8142	14.1113	58.7312	0	0	0	0	0	0	5.46998	34.3882	0.498798	10.0893
P62906	2	2	17.4361	0.00219022	2;3	2	60S ribosomal protein L10a OS=Homo sapiens OX=9606 GN=RPL10A PE=1 SV=2	0	0	2.009	1.91222	0.980304	0.434526	1.36152	52.3467	186.416	60.1397	0	0	0	0	0	14.1384	125.552	78.8376	153.461	92.9973
P26373	5	4	39.1487	0.0020085	4;5	2	60S ribosomal protein L13 OS=Homo sapiens OX=9606 GN=RPL13 PE=1 SV=4	11.5158	16.666	7.2342	9.5203	11.2341	343.475	470.668	5.59963	899.511	429.814	13.0229	12.1115	9.50593	17.0249	12.9163	492.932	171.308	661.041	435.449	440.182
P50914	1	1	5.3252	0.000679403	3	1	60S ribosomal protein L14 OS=Homo sapiens OX=9606 GN=RPL14 PE=1 SV=4	0	0	0	0	0	13.073	24.9437	28.9292	28.6892	23.9088	0	0	0	0	0	0.152163	21.3519	0	19.0481	10.138
P61313	2	2	14.2727	0.0193638	4;6	2	60S ribosomal protein L15 OS=Homo sapiens OX=9606 GN=RPL15 PE=1 SV=2	0	0	0	0	0	5.52799	3.38347	288.12	401.85	174.72	0	0	0	0	0	0	200.183	1.82401	363.726	141.433
P18621	2	2	27.2833	0.0252634	2	1	60S ribosomal protein L17 OS=Homo sapiens OX=9606 GN=RPL17 PE=1 SV=3	0	0	0	0	0	71.1335	219.345	163.978	149.761	151.054	0	0	0	0	0	0.00559643	0	14.7396	125.671	35.104
Q07020	4	3	35.4865	1.14e-05	3;4	2	60S ribosomal protein L18 OS=Homo sapiens OX=9606 GN=RPL18 PE=1 SV=2	43.6307	47.8387	46.9115	49.4178	46.9497	239.641	446.09	339.087	255.404	320.056	13.3582	10.2496	7.49311	12.7125	10.9533	414.486	112.515	93.1088	35.4185	163.882
Q02543	3	1	17.8579	0.0213101	1;2	2	60S ribosomal protein L18a OS=Homo sapiens OX=9606 GN=RPL18A PE=1 SV=2	0	0	0	0	0	44.154	48.9644	45.2904	1.33805	34.9367	0	3.06906	1.51183	1.06947	1.41259	0	0	0	0	0
P46778	5	5	44.675	0.0157806	1;2;3;4	4	60S ribosomal protein L21 OS=Homo sapiens OX=9606 GN=RPL21 PE=1 SV=2	137.205	151.096	125.865	132.443	136.652	316.501	208.971	410.147	221.987	289.401	107.158	205.543	294.181	287.849	223.683	585.205	215.798	628.295	285.258	428.639
P35268;Q6P5R6	5	4	45.2578	0.0349092	3;5;8	3	60S ribosomal protein L22 OS=Homo sapiens OX=9606 GN=RPL22 PE=1 SV=2	131.389	27.912	136.249	152.571	112.03	222.688	86.5931	97.0577	81.8108	122.037	19.9611	38.1029	19.7106	32.9126	27.6718	14.0126	146.388	33.5579	21.6886	53.9117
P62750	3	3	17.9651	6.23e-09	1;2	2	60S ribosomal protein L23a OS=Homo sapiens OX=9606 GN=RPL23A PE=1 SV=1	0.78084	6.21331	0	0.117643	1.77795	369.684	135.829	301.735	382.889	297.534	0	0	0	0	0	522.308	232.815	328.1	206.122	322.336
P39023;Q92901	11	8	89.4977	0.00047406	1;3;4	3	60S ribosomal protein L3 OS=Homo sapiens OX=9606 GN=RPL3 PE=1 SV=2	164.024	174.936	178.024	167.116	171.025	741.798	3318.73	620.937	506.6	1297.02	98.1197	103.432	108.917	100.957	102.857	455.009	541.726	997.562	183.763	544.515
P36578	2	2	18.2278	0.00582249	2;6	2	60S ribosomal protein L4 OS=Homo sapiens OX=9606 GN=RPL4 PE=1 SV=5	0	0	0	0	0	29.5878	625.17	0.16917	51.5345	176.615	0	0	0	0	0	8.65896	85.8493	4.21813	326.099	106.206
P18124	2	2	11.2385	3.41e-10	4;7	2	60S ribosomal protein L7 OS=Homo sapiens OX=9606 GN=RPL7 PE=1 SV=1	30.2735	50.6826	40.9559	24.9009	36.7032	25.0636	34.9621	64.4306	63.43	46.9716	0	0	0	0	0	40.3833	21.1053	22.3658	22.7742	26.6572
P62424	4	3	32.0976	0.00244872	3;5	2	60S ribosomal protein L7a OS=Homo sapiens OX=9606 GN=RPL7A PE=1 SV=2	2.47267	1.31645	1.64257	1.59746	1.75729	761.872	443.294	7.94065	12.0165	306.281	0	0	0	0	0	332.723	8.99234	548.246	13.5367	225.875
P32969	6	5	33.0652	8.24e-05	1;2	2	60S ribosomal protein L9 OS=Homo sapiens OX=9606 GN=RPL9 PE=1 SV=1	1261.21	100.066	291.006	1203.46	713.936	0.00119561	12.5542	4.26115	0.0726294	4.2223	575.026	250.971	253.154	263.692	335.711	102.828	85.8339	199.958	16.505	101.281
P52209	2	1	11.2534	0.0399581	3	1	6-phosphogluconate dehydrogenase, decarboxylating OS=Homo sapiens OX=9606 GN=PGD PE=1 SV=3	173.089	184.483	164.637	169.781	172.998	1.25476	48.1617	50.8953	46.6874	36.7498	96.5785	50.1161	51.9676	45.6481	61.0776	7.85181	47.3506	26.9568	46.6924	32.2129
P24752	1	1	4.3981	0.00165804	1;2	2	Acetyl-CoA acetyltransferase, mitochondrial OS=Homo sapiens OX=9606 GN=ACAT1 PE=1 SV=1	19.3422	22.9539	43.8109	42.8051	32.228	0	0	0	0	0	0	0	0	0	0	46.9638	0	0.0525744	25.8856	18.2255
P39687	2	2	20.1579	4.59e-05	2;3	2	Acidic leucine-rich nuclear phosphoprotein 32 family member A OS=Homo sapiens OX=9606 GN=ANP32A PE=1 SV=1	0	0	0	0	0	24.6433	133.954	92.0789	274.383	131.265	0	0	0	0	0	2.29412	246.993	83.7719	242.017	143.769
Q92688	2	2	21.3796	6e-05	3	1	Acidic leucine-rich nuclear phosphoprotein 32 family member B OS=Homo sapiens OX=9606 GN=ANP32B PE=1 SV=1	3.80232	5.27849	4.75624	5.12645	4.74088	300.153	120.986	279.197	219.506	229.96	0	6.16141	0.576442	50.9154	14.4133	411.25	455.726	372.144	180.182	354.826
Q9BTT0	1	1	6.1726	0.000119145	1	1	Acidic leucine-rich nuclear phosphoprotein 32 family member E OS=Homo sapiens OX=9606 GN=ANP32E PE=1 SV=1	15.6933	53.139	33.3554	2.73904	26.2317	14.4087	11.8017	11.9835	15.6563	13.4626	0	0	0	0	0	5.70765	80.0554	103.916	67.9836	64.4158
P62736;P63267	20	1	227.379	3e-07	1;2;3;4	4	Actin, aortic smooth muscle OS=Homo sapiens OX=9606 GN=ACTA2 PE=1 SV=1	21.5217	20.3856	19.0028	23.7637	21.1685	0	0	0	0	0	0	0	0	0	0	0	0	0	0	0
P63261;O18499;O18500;O42161;P02570;P02571;P02572;P04829;P07837;P10983;P10984;P10986;P10987;P12714;P14227;P15475;P17304;P18600;P18601;P18603;P29751;P30162;P30163;P41340;P48975;P49128;P53456;P53471;P53478;P53484;P53485;P53486;P53505;P53506;P60709;P90689;Q00214;Q00215;Q03342;Q25010;Q25472;Q27250;Q92193;Q93129	50	24	545.233	1.66e-06	1;2;3;4;5;6;7;8;9	9	Actin, cytoplasmic 2 OS=Homo sapiens OX=9606 GN=ACTG1 PE=1 SV=1	8556.82	8514.87	10069.1	11712.4	9713.3	5926.28	7348.1	8121.68	12522.2	8479.57	3443.34	4139.36	4860.02	3370.72	3953.36	39998.3	18184.9	38202.1	28115.1	31125.1
O15143	3	1	19.7622	0.00413217	3	1	Actin-related protein 2/3 complex subunit 1B OS=Homo sapiens OX=9606 GN=ARPC1B PE=1 SV=3	47.0505	61.0386	51.9013	60.67	55.1651	8.87559	23.2483	22.8636	25.0291	20.0042	57.9335	46.5955	55.6443	65.2461	56.3549	1.434	16.1885	12.8041	20.4251	12.7129
P61158	5	4	30.4953	8.99e-05	1;2	2	Actin-related protein 3 OS=Homo sapiens OX=9606 GN=ACTR3 PE=1 SV=3	0	0	0	0	0	31.0367	69.0861	54.9579	178.543	83.4058	0.519516	1.32601	3.02982	3.89317	2.19213	8.18685	246.137	111.884	189.418	138.906
Q9H845	1	1	4.3975	3.84e-07	2	1	Acyl-CoA dehydrogenase family member 9, mitochondrial OS=Homo sapiens OX=9606 GN=ACAD9 PE=1 SV=1	6.00733	18.286	322.151	251.363	149.452	0	0	0	0	0	535.015	594.779	549.461	1076.31	688.89	0	0	0	0	0
P07108	3	3	19.5358	0.00017769	2;5	2	Acyl-CoA-binding protein OS=Homo sapiens OX=9606 GN=DBI PE=1 SV=2	3.23762	2.03776	0	2.03511	1.82762	16.8702	175.589	2.27576	448.422	160.789	0	0	0	0	0	424.191	57.8311	73.0145	315.302	217.585
Q6P587	1	1	6.1868	0.00435869	2	1	Acylpyruvase FAHD1, mitochondrial OS=Homo sapiens OX=9606 GN=FAHD1 PE=1 SV=2	0	0	0	0	0	0	0	0	0	0	0	0	0	0	0	0	47.3827	18.7377	40.256	26.5941
P07741	3	3	19.616	5.05e-11	1;2;4	3	Adenine phosphoribosyltransferase OS=Homo sapiens OX=9606 GN=APRT PE=1 SV=2	0	0	0	0	0	0	0	0	0	0	0	0	0	0	0	479.705	110.046	308.047	123.025	255.206
P23526	2	2	15.4493	0.0124073	3	1	Adenosylhomocysteinase OS=Homo sapiens OX=9606 GN=AHCY PE=1 SV=4	348.851	363.968	366.121	366.37	361.327	322.952	275.368	294.281	283.598	294.05	320.91	197.25	163.874	179.585	215.405	61.5532	218.75	75.5065	247.747	150.889
Q9HDC9	4	3	22.697	6.84e-06	2;3;4	3	Adipocyte plasma membrane-associated protein OS=Homo sapiens OX=9606 GN=APMAP PE=1 SV=2	0	0	0	0	0	9.82949	3.21501	11.2179	3.67955	6.98549	0.101274	0.583254	0.0970183	0.870559	0.413026	8.26209	241.65	144.933	106.842	125.422
P05141	13	7	121.807	0.000235073	1;2;3	3	ADP/ATP translocase 2 OS=Homo sapiens OX=9606 GN=SLC25A5 PE=1 SV=7	121.207	95.0928	111.957	117.132	111.347	899.218	349.087	590.734	383.819	555.714	362.194	423.493	468.694	196.859	362.81	4562.25	2396.53	412.013	2274.63	2411.35
P12236	8	3	91.2252	8.59e-07	1;2;3	3	ADP/ATP translocase 3 OS=Homo sapiens OX=9606 GN=SLC25A6 PE=1 SV=4	56.4441	65.4166	121.863	87.0701	82.6984	339.191	280.622	334.347	139.725	273.471	5.10776	4.70039	1.16262	0.718593	2.92234	1627.38	665.906	138.794	543.692	743.944
Q9H0C2	4	2	46.0375	0.000577502	3	1	ADP/ATP translocase 4 OS=Homo sapiens OX=9606 GN=SLC25A31 PE=2 SV=1	4.75927	0.851034	1.68019	2.79751	2.522	3.40959	11.0009	9.63732	12.6047	9.16312	32.3977	35.9235	32.3925	13.6845	28.5996	34.6376	25.6261	6.0571	29.3833	23.926
P61204;P84077	3	3	19.302	1.52e-06	1;2	2	ADP-ribosylation factor 3 OS=Homo sapiens OX=9606 GN=ARF3 PE=1 SV=2	0	0	0	0	0	6.78407	391.572	139.037	25.7694	140.791	0.516725	0.40221	0.514904	0.423936	0.464444	359.211	125.164	175.238	147.732	201.836
P47895	16	12	143.718	2.15e-06	2;3	2	Aldehyde dehydrogenase family 1 member A3 OS=Homo sapiens OX=9606 GN=ALDH1A3 PE=1 SV=2	812.264	846.611	910.04	899.486	867.1	301.342	398.987	391.833	367.323	364.871	514.647	539.703	513.918	353.033	480.325	328.038	224.662	177.93	185.912	229.135
P01011	1	1	5.6777	0.00184815	3	1	Alpha-1-antichymotrypsin OS=Homo sapiens OX=9606 GN=SERPINA3 PE=1 SV=2	50.2812	50.2522	53.6087	61.7255	53.9669	23.8184	20.2992	11.1576	10.4187	16.4235	223.282	218.615	216.616	219.524	219.509	15.7567	1.74347	49.6209	0	16.7803
P12814	22	14	188.261	1.08e-07	1;2;3;4;6	5	Alpha-actinin-1 OS=Homo sapiens OX=9606 GN=ACTN1 PE=1 SV=2	1346.18	1476.13	1502.39	1492.99	1454.42	1340.86	945.885	1415.13	1208.79	1227.67	1332.49	1288.22	1219.56	1154.5	1248.69	360.527	482.591	293.555	454.939	397.903
P35609	5	3	32.1109	0.0354696	2	1	Alpha-actinin-2 OS=Homo sapiens OX=9606 GN=ACTN2 PE=1 SV=1	0	0	0	0	0	0.413616	4.65452	3.67491	195.459	51.0505	0	0	0	0	0	6.10371	0	49.3052	116.753	43.0404
O43707	28	13	190.262	6.12e-14	1;2;3;4	4	Alpha-actinin-4 OS=Homo sapiens OX=9606 GN=ACTN4 PE=1 SV=2	36086.7	30375.5	34880.9	36238.4	34395.4	487.904	437.804	431.074	530.284	471.767	56498.5	41842.1	44561.7	45847	47187.3	328.005	185.418	234.691	137.842	221.489
P06733;O02654;P07322;P07323;P08734;P09104;P13929;P17182;P17183;P19140;P21550;P25704;P42897;P51913;Q27727;Q27877;Q9PVK2;Q9W7L0;Q9W7L1;Q9W7L2	35	29	347.069	2.97e-08	1;2;3;4;7;8;9	7	Alpha-enolase OS=Homo sapiens OX=9606 GN=ENO1 PE=1 SV=2	5319.12	5980.99	9496.4	9061.87	7464.59	5110.58	7640.58	4595.37	6990.6	6084.28	513.491	603.735	679.982	630.266	606.868	4856.92	8122.83	4738.87	9265.33	6745.99
P04083	5	4	41.2918	0.000129641	1;2	2	Annexin A1 OS=Homo sapiens OX=9606 GN=ANXA1 PE=1 SV=2	84.0812	65.0438	52.1936	0	50.3296	378.154	1233.27	614.129	1324.16	887.429	0	0	0	0	0	314.903	33.3319	40.1668	7.99981	99.1003
P07355	31	6	294.946	0.00433234	1;2;3;4;5;6;7	7	Annexin A2 OS=Homo sapiens OX=9606 GN=ANXA2 PE=1 SV=2	59.8462	59.2502	60.0547	49.8689	57.255	514.991	140.195	438.23	263.942	339.339	31.4502	69.5999	64.9005	12.7955	44.6865	244.698	183.481	35.2	68.9574	133.084
P12429	4	3	26.889	0.00900313	2	1	Annexin A3 OS=Homo sapiens OX=9606 GN=ANXA3 PE=1 SV=3	0	0	0	0	0	13.8844	41.8734	22.6914	0	19.6123	0	0	0	0	0	0	0	0	0	0
P00966	2	2	11.9604	0.0129662	2;4	2	Argininosuccinate synthase OS=Homo sapiens OX=9606 GN=ASS1 PE=1 SV=2	0	0	0	0	0	12.5716	2.29817	8.58498	11.9394	8.84854	3.71568	4.37959	3.84394	4.67516	4.15359	1.50466	81.9031	190.209	55.5296	82.2866
P00505	6	6	67.1881	7.6e-09	3;4;8	3	Aspartate aminotransferase, mitochondrial OS=Homo sapiens OX=9606 GN=GOT2 PE=1 SV=3	21.8102	23.5205	22.3033	19.3257	21.7399	342.838	413.854	635.543	430.967	455.801	46.668	26.7603	69.6004	68.8465	52.9688	428.089	1019.8	677.139	517.958	660.746
P14868	2	2	10.784	0.000286403	3	1	Aspartate--tRNA ligase, cytoplasmic OS=Homo sapiens OX=9606 GN=DARS PE=1 SV=2	42.0778	43.6664	41.0693	43.373	42.5466	103.331	33.9253	32.6712	27.5188	49.3617	8.78383	2.56836	4.84099	3.50093	4.92353	36.8821	19.6894	120.928	20.3104	49.4525
P24539	1	1	10.3084	0.0179293	3	1	ATP synthase F(0) complex subunit B1, mitochondrial OS=Homo sapiens OX=9606 GN=ATP5PB PE=1 SV=2	0	0	0	0	0	10.6487	0.848349	0.303504	0.597542	3.09953	0	0	0	0	0	139.879	0	28.8456	10.661	44.8463
P25705;P19483	19	14	158.304	2.68e-05	1;2;3;4;5;9	6	ATP synthase subunit alpha, mitochondrial OS=Homo sapiens OX=9606 GN=ATP5F1A PE=1 SV=1	263.203	238.414	258.284	262.42	255.58	312.635	605.952	518.192	1362.66	699.859	1346.76	1420.93	1312.56	1394.64	1368.72	3790.58	1500.33	2406.91	1398.3	2274.03
P06576	21	20	198.012	1.02e-06	1;2;3;4;5;7;8	7	ATP synthase subunit beta, mitochondrial OS=Homo sapiens OX=9606 GN=ATP5F1B PE=1 SV=3	330.398	372.087	499.528	603.283	451.324	1881.03	964.507	745.299	1319.25	1227.52	717.113	779.276	829.914	709.356	758.915	5310.71	3710.28	4689.06	2744.7	4113.69
Q08211	14	13	88.7799	0.0310386	2;3	2	ATP-dependent RNA helicase A OS=Homo sapiens OX=9606 GN=DHX9 PE=1 SV=4	121.144	123.747	127.23	124.261	124.096	114.989	338.961	272.763	324.16	262.718	117.857	142.686	120.539	143.437	131.13	117.973	278.116	262.884	404.479	265.863
Q92499	5	4	27.442	0.00147977	2;3;4	3	ATP-dependent RNA helicase DDX1 OS=Homo sapiens OX=9606 GN=DDX1 PE=1 SV=2	13.1832	13.4368	9.80424	20.5456	14.2424	38.6416	57.1819	7.80531	57.4159	40.2612	28.483	34.2768	46.0659	10.4504	29.819	86.8015	176.517	118.337	324.975	176.658
Q13490	1	1	4.5907	0.010817	1	1	Baculoviral IAP repeat-containing protein 2 OS=Homo sapiens OX=9606 GN=BIRC2 PE=1 SV=2	0	0	0	0	0	11.4095	0.792586	12.7786	16.7273	10.427	0	0	0	0	0	0	0	0	0	0
O75531	2	2	10.0412	9.76e-05	3;7;8	3	Barrier-to-autointegration factor OS=Homo sapiens OX=9606 GN=BANF1 PE=1 SV=1	0	0	0	0	0	0	0	0	0	0	220.949	324.055	213.597	364.189	280.697	0	0	0	0	0
P61769	1	1	6.4824	7.27e-07	7	1	Beta-2-microglobulin OS=Homo sapiens OX=9606 GN=B2M PE=1 SV=1	131.277	93.2283	131.139	125.298	120.236	0	0	0	0	0	7.59073	9.31421	0	0.478896	4.34596	0	0	0	0	0
P07814	15	3	100.716	0.0205888	2;3	2	Bifunctional glutamate/proline--tRNA ligase OS=Homo sapiens OX=9606 GN=EPRS PE=1 SV=5	124.053	140.206	133	124.082	130.335	53.2539	120.672	166	128.318	117.061	172.827	153.556	183.75	130.26	160.098	50.1458	81.7593	18.2541	92.9423	60.7754
P31939	13	9	82.0675	3.99e-06	1;2;3;5	4	Bifunctional purine biosynthesis protein PURH OS=Homo sapiens OX=9606 GN=ATIC PE=1 SV=3	0	0	0	0	0	3.40493	3.02645	4.54202	27.7379	9.67782	3.29604	44.5615	2.30729	1.92234	13.0218	258.908	436.342	322.267	219.321	309.209
P12830	4	4	31.4251	0.000979839	3;4	2	Cadherin-1 OS=Homo sapiens OX=9606 GN=CDH1 PE=1 SV=3	636.291	728.405	631.529	602.419	649.661	82.5017	15.4327	104.269	46.217	62.105	63.8189	37.0473	36.8889	66.6474	51.1006	106.236	219.593	12.9874	69.768	102.146
Q96S95	1	1	9.655	0.000851195	3	1	Calcium/calmodulin-dependent protein kinase II inhibitor 2 OS=Homo sapiens OX=9606 GN=CAMK2N2 PE=2 SV=1	0	0	0	0	0	17.2755	29.2536	17.9273	12.3511	19.2019	2.25648	1.95887	12.8316	4.11148	5.2896	5.70531	60.4662	4.03369	45.6081	28.9533
P0DP25;P0DP23;P0DP24	3	3	21.9977	1.1e-12	1;2	2	Calmodulin-3 OS=Homo sapiens OX=9606 GN=CALM3 PE=1 SV=1	131.444	176.135	274.144	294.477	219.05	1060.13	627.243	448.005	1080.42	803.95	0	0	0	0	0	920.55	898.163	1780.16	936.17	1133.76
O43852	6	3	39.825	2.28e-06	1;2	2	Calumenin OS=Homo sapiens OX=9606 GN=CALU PE=1 SV=2	0	0	0	0	0	47.3724	99.7177	105.569	75.6446	82.0758	0	0	0	0	0	5.96691	3.92259	23.3093	0.243185	8.3605
P04040	6	3	39.9529	0.0113037	1;2;3	3	Catalase OS=Homo sapiens OX=9606 GN=CAT PE=1 SV=3	0.148476	1.13186	0.71856	0.621047	0.654985	35.201	77.9522	96.2693	86.9616	74.096	7.15847	4.78022	15.4878	0	6.85661	1.58196	89.8674	0.221566	78.4821	42.5382
P21964	1	1	7.5625	0.00242733	2	1	Catechol O-methyltransferase OS=Homo sapiens OX=9606 GN=COMT PE=1 SV=2	0	0	0	0	0	1.1255	0.873767	0	35.4297	9.35725	0	0	0	0	0	16.7979	151.817	62.4847	122.974	88.5184
P35221;P26231	25	13	168.61	2.56e-06	3;4;8;9	4	Catenin alpha-1 OS=Homo sapiens OX=9606 GN=CTNNA1 PE=1 SV=1	1378.4	1316.13	1339.3	1200.94	1308.69	442.551	236.64	311.406	417.438	352.009	531.87	552.286	603.392	468.436	538.996	238.175	437.91	201.306	245.204	280.649
O60716	21	12	143.363	1.02e-06	3;4	2	Catenin delta-1 OS=Homo sapiens OX=9606 GN=CTNND1 PE=1 SV=1	1065.16	1094.48	1091.58	1104.65	1088.97	317.839	284.778	311.997	381.89	324.126	355.867	284.407	403.413	358.971	350.665	146.074	143.207	312.113	116.072	179.366
P07339	13	12	100.37	0.0216325	1;2;3;4;5	5	Cathepsin D OS=Homo sapiens OX=9606 GN=CTSD PE=1 SV=1	109.501	51.6561	107.955	73.714	85.7066	124.561	12010.5	195.9	2414.71	3686.42	137.085	115.081	135.231	5778.18	1541.39	2023.03	1863.2	10150.2	6240.99	5069.35
Q13740	2	1	9.3823	1.69e-14	4;7	2	CD166 antigen OS=Homo sapiens OX=9606 GN=ALCAM PE=1 SV=2	81.7135	80.8098	101.124	110.315	93.4904	0	0	0	0	0	0	0	0	0	0	0	0	0	0	0
P16070	2	1	19.8204	0.000238154	4	1	CD44 antigen OS=Homo sapiens OX=9606 GN=CD44 PE=1 SV=3	187.278	193.059	194.808	189.022	191.042	17.3337	2.42814	17.1137	15.3821	13.0644	0	0	0	0	0	52.0681	0	2.39298	56.3033	27.6911
P13987	1	1	9.6874	0.00181225	4	1	CD59 glycoprotein OS=Homo sapiens OX=9606 GN=CD59 PE=1 SV=1	50.6763	53.4573	42.9372	40.8823	46.9882	19.5678	1.05316	22.6054	14.3869	14.4033	0	0	0	0	0	0	0	0	0	0
Q8IX12	2	1	9.7813	0.00327408	4	1	Cell division cycle and apoptosis regulator protein 1 OS=Homo sapiens OX=9606 GN=CCAR1 PE=1 SV=2	6.63324	8.82633	8.52281	8.97817	8.24014	0	0	0	0	0	55.2441	93.7804	97.8376	100.359	86.8054	45.4928	0	9.23199	12.1294	16.7135
P45973	1	1	6.3108	0.0471105	3	1	Chromobox protein homolog 5 OS=Homo sapiens OX=9606 GN=CBX5 PE=1 SV=1	14.7046	16.2067	14.6846	15.5398	15.2839	18.7471	11.1547	14.2956	5.14113	12.3346	115.619	117.914	134.836	0	92.0924	0	0	0	0	0
Q9HC52	2	1	17.0128	0.00636389	4	1	Chromobox protein homolog 8 OS=Homo sapiens OX=9606 GN=CBX8 PE=1 SV=3	13.6408	11.7013	11.5173	11.5234	12.0957	29.4685	4.95121	0	22.3144	14.1835	173.786	231.399	227.793	251.794	221.193	2.86343	87.2979	12.2044	37.3661	34.933
O75390	7	5	55.2545	4.43e-09	1;2;4;5	4	Citrate synthase, mitochondrial OS=Homo sapiens OX=9606 GN=CS PE=1 SV=2	28.1334	29.2066	20.2018	29.2803	26.7055	322.303	281.5	204.229	443.663	312.924	28.6405	32.3436	27.3962	34.4114	30.6979	784.726	316.946	389.155	647.521	534.587
Q00610	29	20	207.733	4.19e-07	1;2;3;4	4	Clathrin heavy chain 1 OS=Homo sapiens OX=9606 GN=CLTC PE=1 SV=5	308.813	389.618	426.142	478.577	400.787	800.555	710.985	661.569	1029.11	800.554	334.857	295.614	377.219	355.746	340.859	2565.41	1188.08	1933.72	1852.38	1884.9
Q96KA5	3	3	15.2032	0.0170483	2;4	2	Cleft lip and palate transmembrane protein 1-like protein OS=Homo sapiens OX=9606 GN=CLPTM1L PE=1 SV=1	0	0	0	0	0	127.453	0	54.5194	19.3692	50.3355	0	0	0	0	0	1.67725	1.32502	14.0259	3.49254	5.13017
Q14019	2	2	12.2068	0.0332923	2	1	Coactosin-like protein OS=Homo sapiens OX=9606 GN=COTL1 PE=1 SV=3	0	0	0	0	0	17.6534	0	61.7232	181.806	65.2956	1.41713	1.00983	0.670523	0.931937	1.00735	2.04857	25.2466	4.8707	0	8.04146
P23528	10	8	91.7865	1.64e-08	1;2;3;8	4	Cofilin-1 OS=Homo sapiens OX=9606 GN=CFL1 PE=1 SV=3	460.094	549.327	808.818	750.432	642.168	772.22	786.043	469.223	884.996	728.12	58.8348	58.4243	70.4757	68.7923	64.1318	3435.2	2507.24	1135.6	1926.83	2251.22
Q8IYT3	1	1	4.6754	0.00226355	2	1	Coiled-coil domain-containing protein 170 OS=Homo sapiens OX=9606 GN=CCDC170 PE=1 SV=3	185.914	151.774	286.172	271.757	223.904	0.226042	30.4553	0.201338	20.7222	12.9012	0	0	0	0	0	0	93.4167	52.5497	1.2273	36.7984
Q9H9Q2	1	1	5.6434	0.00637315	3	1	COP9 signalosome complex subunit 7b OS=Homo sapiens OX=9606 GN=COPS7B PE=1 SV=1	8.39868	10.0663	6.92262	10.8024	9.04749	33.1826	73.8945	79.3478	89.2755	68.9251	6.90888	5.73514	0	3.8607	4.12618	28.9084	169.124	4.10456	158.503	90.1601
O75367	9	6	117.733	4.94e-09	1;2;3;4	4	Core histone macro-H2A.1 OS=Homo sapiens OX=9606 GN=H2AFY PE=1 SV=4	946.119	943.114	943.523	899.898	933.163	255.046	270.934	483.154	400.331	352.366	5917.94	6764.49	6875.31	5099.53	6164.32	538.722	372.022	233.656	487.342	407.935
Q9P0M6	10	4	74.3441	4.91e-05	3;4	2	Core histone macro-H2A.2 OS=Homo sapiens OX=9606 GN=H2AFY2 PE=1 SV=3	144.372	145.782	154.006	135.308	144.867	11.2693	27.5816	31.3313	29.2653	24.8618	115.522	120.735	132.198	143.662	128.029	39.2502	17.1886	76.5978	44.6411	44.4194
P04080	2	2	18.2742	0.0218799	4;5	2	Cystatin-B OS=Homo sapiens OX=9606 GN=CSTB PE=1 SV=2	0	0	0	0	0	39.4162	190.462	87.2677	0	79.2863	0	0	0	0	0	169.276	63.826	5.30096	0	59.6007
Q9H8E8	1	1	4.0218	5.55e-16	8	1	Cysteine-rich protein 2-binding protein OS=Homo sapiens OX=9606 GN=KAT14 PE=1 SV=3	0	0	0	0	0	25.9292	29.1647	25.86	23.7833	26.1843	0	0	0	0	0	14.9407	12.3328	10.8063	9.73513	11.9537
Q7L1T6	2	1	14.6694	0.00651993	3	1	Cytochrome b5 reductase 4 OS=Homo sapiens OX=9606 GN=CYB5R4 PE=1 SV=1	32.1249	42.6607	35.9349	38.0393	37.19	0.409552	8.04976	4.1499	8.69745	5.32667	0.688958	1.08547	1.61024	1.17516	1.13996	112.568	3.42037	1.79998	5.08366	30.718
O43169	2	2	11.9705	1.53e-05	4	1	Cytochrome b5 type B OS=Homo sapiens OX=9606 GN=CYB5B PE=1 SV=3	3.18259	3.74631	3.41773	2.739	3.27141	11.8643	15.5973	1.86278	7.72394	9.26207	0	0	0	0	0	8.71113	113.9	59.3855	50.2118	58.0521
P07919	1	1	5.7957	0.00195273	4	1	Cytochrome b-c1 complex subunit 6, mitochondrial OS=Homo sapiens OX=9606 GN=UQCRH PE=1 SV=2	0	0	0	0	0	9.68916	39.6955	0.400692	16.9371	16.6806	0	0	0	0	0	245.261	19.6926	11.6149	2.8432	69.853
P13073	3	2	34.1652	0.0175898	4	1	Cytochrome c oxidase subunit 4 isoform 1, mitochondrial OS=Homo sapiens OX=9606 GN=COX4I1 PE=1 SV=1	21.0482	19.177	18.123	18.8234	19.2929	57.796	245.127	81.237	35.9676	105.032	75.5229	57.6337	62.2151	75.8708	67.8106	373.108	32.1634	186.49	66.5885	164.588
Q9HBI6	2	1	18.516	0.000107978	5	1	Cytochrome P450 4F11 OS=Homo sapiens OX=9606 GN=CYP4F11 PE=1 SV=3	285.032	269.607	286.574	274.174	278.847	16.0288	35.8633	0	34.7171	21.6523	0	0	0	0	0	0	0	0	0	0
Q07065	8	4	58.6192	0.000164715	1;2;3	3	Cytoskeleton-associated protein 4 OS=Homo sapiens OX=9606 GN=CKAP4 PE=1 SV=2	26.7455	89.853	17.672	20.6521	38.7307	76.8342	58.7183	154.896	138.17	107.155	0	0	0	0	0	26.043	2.21657	17.8094	41.0496	21.7796
Q8NEM8	2	1	9.8206	0.000444336	1;2	2	Cytosolic carboxypeptidase 3 OS=Homo sapiens OX=9606 GN=AGBL3 PE=2 SV=2	0	0	0	0	0	2.64052	1.09198	0.691677	5.76738	2.54789	0	0	0	0	0	10.6873	4.13952	79.6425	5.52096	24.9976
Q96KP4	2	2	13.4991	0.00433492	2	1	Cytosolic non-specific dipeptidase OS=Homo sapiens OX=9606 GN=CNDP2 PE=1 SV=2	0.52846	1.35589	0	1.73171	0.904014	0	0	0	0	0	0	0	0	0	0	0	42.6406	54.7192	32.9751	32.5837
O43175	13	6	95.7783	0.000112622	2;3;4	3	D-3-phosphoglycerate dehydrogenase OS=Homo sapiens OX=9606 GN=PHGDH PE=1 SV=4	1879.49	5149.54	7654.02	6191.21	5218.56	562.924	228.191	816.613	73.2178	420.236	3160.72	4220.83	4257.04	3815.58	3863.54	42.2069	591.456	16.5488	34.7847	171.249
Q14566	3	2	14.8953	3.57e-06	1	1	DNA replication licensing factor MCM6 OS=Homo sapiens OX=9606 GN=MCM6 PE=1 SV=1	0	0	0	0	0	18.944	1.18604	21.4776	1.90174	10.8773	0	0	0	0	0	78.5737	94.5984	47.0755	28.5521	62.1999
P33993	3	3	16.4833	0.0463021	3	1	DNA replication licensing factor MCM7 OS=Homo sapiens OX=9606 GN=MCM7 PE=1 SV=4	57.0264	53.1686	50.0641	46.6325	51.7229	84.8922	115.687	56.6646	96.6965	88.4851	117.899	247.283	232.164	206.84	201.047	125.711	190.177	22.0506	216.496	138.609
P27695	2	2	11.4473	0.000590646	3;4	2	DNA-(apurinic or apyrimidinic site) lyase OS=Homo sapiens OX=9606 GN=APEX1 PE=1 SV=2	72.911	67.0431	70.3352	56.5816	66.7177	49.1593	45.9243	6.20213	34.8416	34.0318	701.133	759.942	832.234	425.412	679.68	17.4858	26.47	0	18.8978	15.7134
P78527	4	3	24.696	0.002638	1	1	DNA-dependent protein kinase catalytic subunit OS=Homo sapiens OX=9606 GN=PRKDC PE=1 SV=3	0	0	0	0	0	11.4039	8.8902	7.36786	4.01036	7.91809	0	0	0	0	0	141.681	97.3617	0	32.8866	67.9823
Q8NHS0	1	1	4.4261	0.0392304	3	1	DnaJ homolog subfamily B member 8 OS=Homo sapiens OX=9606 GN=DNAJB8 PE=1 SV=1	0	0	0	0	0	0.264364	5.21175	7.19026	7.46247	5.03221	0	0	0	0	0	0	0	0	0	0
Q99543	1	1	4.2587	0.0024919	4	1	DnaJ homolog subfamily C member 2 OS=Homo sapiens OX=9606 GN=DNAJC2 PE=1 SV=4	32.0579	34.5686	34.4715	29.5794	32.6694	17.3243	0	0.508396	2.01054	4.9608	3.13696	4.28996	2.42691	0.863026	2.67921	0	0.937919	3.74799	2.83969	1.8814
P04844	12	6	96.3379	5.53e-09	1;2;3;4	4	Dolichyl-diphosphooligosaccharide--protein glycosyltransferase subunit 2 OS=Homo sapiens OX=9606 GN=RPN2 PE=1 SV=3	0	0	0	0	0	205.558	28.807	133.825	193.829	140.505	3.85294	1.41896	3.54065	4.26833	3.27022	350.115	310.861	482.953	327.187	367.779
P55265	2	1	8.8668	0.00381658	1	1	Double-stranded RNA-specific adenosine deaminase OS=Homo sapiens OX=9606 GN=ADAR PE=1 SV=4	0	0	0	0	0	30.1137	29.5571	35.1644	0	23.7088	0	0	0	0	0	0	0	0	0	0
P63167	2	2	10.5745	0.00207644	1;2	2	Dynein light chain 1, cytoplasmic OS=Homo sapiens OX=9606 GN=DYNLL1 PE=1 SV=1	0	0	0	0	0	0	0	0	0	0	0	0	0	0	0	85.0256	13.4434	7.78465	49.246	38.8749
Q96FJ2	1	1	12.8891	0.000462933	1;2	2	Dynein light chain 2, cytoplasmic OS=Homo sapiens OX=9606 GN=DYNLL2 PE=1 SV=1	0	0	0	0	0	0.154599	14.5304	3.61533	19.2683	9.39216	0	0	0	0	0	2.97186	51.9743	69.8514	59.7369	46.1336
P53804	3	2	13.0699	9.08e-07	1	1	E3 ubiquitin-protein ligase TTC3 OS=Homo sapiens OX=9606 GN=TTC3 PE=1 SV=2	0	0	0	0	0	31.5826	12.6854	69.8796	10.2537	31.1003	0	0	0	0	0	36.0592	17.6484	12.5917	59.2614	31.3902
P13804	5	2	35.5277	0.00245414	1;2;3	3	Electron transfer flavoprotein subunit alpha, mitochondrial OS=Homo sapiens OX=9606 GN=ETFA PE=1 SV=1	0	0.556149	0.258954	1.24466	0.51494	104.383	4.79869	109.501	125.931	86.1534	0	0	0	0	0	2.15319	0.881165	207.91	68.382	69.8315
P68104	27	1	243.598	0.0215261	1;2;3;4;5;6;7;8	8	Elongation factor 1-alpha 1 OS=Homo sapiens OX=9606 GN=EEF1A1 PE=1 SV=1	0	4.18285	3.76994	2.16863	2.53036	18.4877	0	64.6616	17.9982	25.2869	0	0	0	0	0	0	0	0	0	0
Q05639	16	4	159.903	0.000133673	1;2;3;4;5;6;7;8;9	9	Elongation factor 1-alpha 2 OS=Homo sapiens OX=9606 GN=EEF1A2 PE=1 SV=1	31.3633	86.131	30.2578	28.9058	44.1645	62.9976	20.5678	17.523	61.7702	40.7146	21.7777	18.1872	17.7341	20.9571	19.664	106.117	993.931	981.69	439.443	630.295
P24534	4	3	24.3908	1.85e-06	3;7;8;9	4	Elongation factor 1-beta OS=Homo sapiens OX=9606 GN=EEF1B2 PE=1 SV=3	2.30658	1.83092	0.783152	30.7778	8.92461	0	0	0	0	0	196.175	126.029	55.9666	69.5368	111.927	0	0	0	0	0
P29692	13	6	101.611	1.02e-07	2;3;4;8	4	Elongation factor 1-delta OS=Homo sapiens OX=9606 GN=EEF1D PE=1 SV=5	316.57	380.991	355.297	463.511	379.092	70.3251	128.661	159.443	133.785	123.053	614.754	550.265	589.59	591.497	586.527	65.3406	105.669	56.7898	78.8741	76.6683
P26641	13	9	103.668	0.00223277	1;3;4;5;7;8	6	Elongation factor 1-gamma OS=Homo sapiens OX=9606 GN=EEF1G PE=1 SV=3	105.949	99.5768	219.921	205.808	157.814	819.292	670.367	433.888	375.15	574.674	380.504	479.727	444.613	363.057	416.975	234.447	157.308	32.5561	133.175	139.372
P13639;P05086;P05197;P09445;P58252;Q90705	17	15	143.08	0.000924876	2;3;5;8;9	5	Elongation factor 2 OS=Homo sapiens OX=9606 GN=EEF2 PE=1 SV=4	1057.49	1026.52	1342.8	977.677	1101.12	266.126	818.268	674.13	546.255	576.195	291.123	287.788	339.248	91.0531	252.303	926.691	613.031	1131.25	792.108	865.769
P49411	9	6	78.1838	1.9e-09	1;2;3	3	Elongation factor Tu, mitochondrial OS=Homo sapiens OX=9606 GN=TUFM PE=1 SV=2	103.776	101.763	113.087	91.24	102.466	185.629	233.685	170.977	236.833	206.781	700.623	966.598	804.96	735.463	801.911	271.232	302.061	196.574	247.37	254.309
P11021	31	23	229.539	3.96e-07	1;2;3	3	Endoplasmic reticulum chaperone BiP OS=Homo sapiens OX=9606 GN=HSPA5 PE=1 SV=2	752.334	817.812	709.852	695.078	743.769	2493.05	2302.33	2352.84	2390.88	2384.78	338.176	414.98	371.446	322.756	361.84	3279.09	1213.2	2587.72	1441.89	2130.47
P30040	2	2	12.929	0.00523906	1;2	2	Endoplasmic reticulum resident protein 29 OS=Homo sapiens OX=9606 GN=ERP29 PE=1 SV=4	0.927774	0.209832	1.22323	0	0.59021	0	0	0	0	0	0	0	0	0	0	179.473	30.0512	54.4311	0	65.9888
Q9BS26	1	1	6.3795	5.66e-10	2	1	Endoplasmic reticulum resident protein 44 OS=Homo sapiens OX=9606 GN=ERP44 PE=1 SV=1	0	0	0	0	0	28.1075	80.7236	39.818	77.093	56.4355	0	0	0	0	0	0	0	0	0	0
P14625	32	22	229.081	4.49e-12	1;2;3;4;5	5	Endoplasmin OS=Homo sapiens OX=9606 GN=HSP90B1 PE=1 SV=1	221.559	240.514	258.991	232.15	238.303	1445.19	1365.54	1659.31	1792.24	1565.57	298.088	275.392	334.323	399.148	326.738	2207.83	1957.67	2306.64	2413.81	2221.49
P42126	2	1	12.0136	3.05e-05	1;2	2	Enoyl-CoA delta isomerase 1, mitochondrial OS=Homo sapiens OX=9606 GN=ECI1 PE=1 SV=1	0	0	0	0	0	19.6164	10.2649	72.0932	63.8526	41.4568	0	0	0	0	0	448.748	110.283	211.551	182.399	238.245
P30084	5	4	45.9306	1.75e-05	3;4	2	Enoyl-CoA hydratase, mitochondrial OS=Homo sapiens OX=9606 GN=ECHS1 PE=1 SV=4	77.3646	101.004	73.4443	76.0867	81.975	20.2559	26.6402	0.46071	10.3701	14.4317	827.306	601.71	499.155	52.8166	495.247	0	0	0	0	0
P07099	3	3	23.2766	0.0176237	4	1	Epoxide hydrolase 1 OS=Homo sapiens OX=9606 GN=EPHX1 PE=1 SV=1	39.1596	39.0778	40.3614	44.0808	40.6699	189.824	274.019	96.7609	216.001	194.151	65.9376	64.1317	80.8296	90.6356	75.3836	346.848	159.495	38.6468	53.3284	149.579
O94905	1	1	6.231	1.77e-08	1	1	Erlin-2 OS=Homo sapiens OX=9606 GN=ERLIN2 PE=1 SV=1	0	0	0	0	0	2.85235	0	0.424677	0.515463	0.948123	0	0	0	0	0	47.2494	35.3987	19.6684	39.9567	35.5683
Q96HE7	4	3	39.4689	0.000405435	3;4	2	ERO1-like protein alpha OS=Homo sapiens OX=9606 GN=ERO1A PE=1 SV=2	8.04301	4.01849	7.09002	7.81008	6.7404	164.177	101.531	240.592	85.4884	147.947	7.39818	7.00038	0	4.30895	4.67688	26.3898	116.997	7.94019	86.8192	59.5366
P60842	10	9	87.3346	9.05e-07	1;2;3	3	Eukaryotic initiation factor 4A-I OS=Homo sapiens OX=9606 GN=EIF4A1 PE=1 SV=1	112.005	107.674	128.782	113.469	115.483	212.932	394.929	401.154	399.13	352.036	113.68	139.464	110.615	96.9845	115.186	336.164	482.146	490.547	346.505	413.84
P15170	4	3	22.8052	0.0269595	3	1	Eukaryotic peptide chain release factor GTP-binding subunit ERF3A OS=Homo sapiens OX=9606 GN=GSPT1 PE=1 SV=1	163.11	146.349	80.9723	80.8003	117.808	34.2076	42.6012	87.9691	85.2182	62.499	300.46	54.0272	114.023	280.917	187.357	46.4331	52.0036	37.066	59.3298	48.7081
P05198	2	2	11.9961	6.25e-06	4	1	Eukaryotic translation initiation factor 2 subunit 1 OS=Homo sapiens OX=9606 GN=EIF2S1 PE=1 SV=3	21.1976	15.1033	16.3503	23.1069	18.9395	28.4861	33.635	46.9588	34.2815	35.8404	147.09	167.65	169.943	153.495	159.544	16.1736	10.4331	11.3187	45.6617	20.8968
P41091;Q2VIR3	6	4	40.3516	1.76e-05	3;5	2	Eukaryotic translation initiation factor 2 subunit 3 OS=Homo sapiens OX=9606 GN=EIF2S3 PE=1 SV=3	1272.7	946.74	382.754	577.135	794.833	42.4095	78.5609	2.41881	50.6393	43.5071	4932.86	5049.6	3309.6	3984.43	4319.12	186.08	39.3298	37.4702	88.864	87.9359
P23588	1	1	4.8586	0.00152657	3	1	Eukaryotic translation initiation factor 4B OS=Homo sapiens OX=9606 GN=EIF4B PE=1 SV=2	64.9506	56.4957	73.5906	66.4444	65.3703	9.59145	49.4939	51.4877	44.2193	38.6981	223.342	229.038	286.275	246.79	246.361	72.6764	60.9439	14.3915	70.1317	54.5359
P52907	4	2	25.6621	0.00152135	1;3	2	F-actin-capping protein subunit alpha-1 OS=Homo sapiens OX=9606 GN=CAPZA1 PE=1 SV=3	173.237	155.763	158.895	159.129	161.756	168.303	135.423	205.225	134.576	160.882	52.3821	64.0049	56.9023	70.5131	60.9506	206	330.008	106.879	615.222	314.527
Q96I24	3	3	16.6833	0.00140875	2	1	Far upstream element-binding protein 3 OS=Homo sapiens OX=9606 GN=FUBP3 PE=1 SV=2	182.88	30.8497	146.359	181.485	135.394	0	1.80411	86.7348	18.4609	26.75	0	0	0	0	0	5.24217	336.672	45.2855	25.8958	103.274
P49327	63	38	404.68	5.98e-05	1;2;3;4;5;8	6	Fatty acid synthase OS=Homo sapiens OX=9606 GN=FASN PE=1 SV=3	1877.73	2254.39	2841.86	2587.81	2390.45	939.57	831.425	812.843	1107.65	922.872	1349.88	1412.82	1515.99	1897.64	1544.08	1860.22	2410.34	2626.24	1495.02	2097.95
Q8N4B4	1	1	5.3726	4.97e-06	8	1	F-box only protein 39 OS=Homo sapiens OX=9606 GN=FBXO39 PE=2 SV=1	0	0	0	0	0	45.6486	41.9856	44.8765	42.9846	43.8738	0	0	0	0	0	0	0	0	0	0
Q6PIW4	1	1	4.1249	5.55e-16	7	1	Fidgetin-like protein 1 OS=Homo sapiens OX=9606 GN=FIGNL1 PE=1 SV=2	0	0	0	0	0	11.5768	13.3746	10.3442	11.8889	11.7961	0	0	0	0	0	2.95688	2.47112	2.72595	2.27724	2.6078
P21333	114	87	911.803	6.09e-07	1;2;3;4;5;8	6	Filamin-A OS=Homo sapiens OX=9606 GN=FLNA PE=1 SV=4	12226	11542.1	14753.2	15577.2	13524.6	3973	4247.01	3369.97	5266.74	4214.18	7642.9	7906.44	8283.71	7747.42	7895.12	6472.94	6789.98	8789.57	8067.52	7530
O75369	28	18	151.273	0.00259828	1;2;3	3	Filamin-B OS=Homo sapiens OX=9606 GN=FLNB PE=1 SV=2	382.141	484.925	616.173	535.521	504.69	249.636	364.81	403.756	454.66	368.215	93.622	134.409	134.043	238.915	150.247	766.502	301.095	228.345	631.388	481.832
Q14315	7	5	44.5773	0.04163	4	1	Filamin-C OS=Homo sapiens OX=9606 GN=FLNC PE=1 SV=3	521.679	506.883	518.922	559.963	526.862	305.195	5.95686	310.237	297.242	229.658	557.277	736.745	726.109	785.402	701.383	28.4666	361.513	4.64873	81.2075	118.959
P39748	4	2	26.2719	1.21e-11	2;3	2	Flap endonuclease 1 OS=Homo sapiens OX=9606 GN=FEN1 PE=1 SV=1	0	0	0	0	0	0	0	0	0	0	48.6111	145.437	160.529	192.804	136.845	0	0	0	0	0
P09467;O00757	8	8	79.2479	5.43e-05	1;2;3	3	Fructose-1,6-bisphosphatase 1 OS=Homo sapiens OX=9606 GN=FBP1 PE=1 SV=5	7.58702	31.2291	32.8477	19.9794	22.9108	141.429	66.0158	66.4463	36.1645	77.5138	2.23478	0.369363	1.71394	41.2335	11.3879	505.291	872.892	698.056	606.921	670.79
P09972	7	3	39.6196	9.02e-06	1;2	2	Fructose-bisphosphate aldolase C OS=Homo sapiens OX=9606 GN=ALDOC PE=1 SV=2	378.239	496.333	785.533	713.282	593.347	0.837725	0.163861	0.482689	1.20319	0.671865	0	0	0	0	0	0.355098	0.344922	12.2347	80.0767	23.2529
P07954	2	2	11.9669	0.00232061	3	1	Fumarate hydratase, mitochondrial OS=Homo sapiens OX=9606 GN=FH PE=1 SV=3	0.449125	0	0.843134	1.13544	0.606925	55.0649	82.0389	20.8682	112.552	67.6311	11.0108	8.26225	17.2422	11.1753	11.9226	14.3649	84.556	0	16.0117	28.7331
Q9NWQ4	1	1	9.4664	0.000258856	6	1	G patch domain-containing protein 2-like OS=Homo sapiens OX=9606 GN=GPATCH2L PE=1 SV=3	30.3927	19.6976	0	24.2455	18.5839	60.8733	2.81279	45.3765	42.2658	37.8321	552.271	479.227	457.911	383.972	468.345	0.233373	2.78314	2.37474	0	1.34782
P09382	5	3	56.1111	0.0026941	3	1	Galectin-1 OS=Homo sapiens OX=9606 GN=LGALS1 PE=1 SV=2	805.677	821.946	788.908	795.457	802.997	67.5829	324.147	310.465	284.711	246.726	505.436	516.986	508.331	382.444	478.299	345.819	108.948	258.358	130.327	210.863
Q08380	2	2	9.8775	0.000161777	1	1	Galectin-3-binding protein OS=Homo sapiens OX=9606 GN=LGALS3BP PE=1 SV=1	0	0	0	0	0	37.1643	31.4605	47.9526	1.8948	29.6181	0	0	0	0	0	1.23599	0.245168	3.08629	0	1.14186
Q9BSJ2	1	1	10.5374	3.2e-12	8	1	Gamma-tubulin complex component 2 OS=Homo sapiens OX=9606 GN=TUBGCP2 PE=1 SV=2	0	0	0	0	0	107.958	112.35	124.559	133.208	119.519	0	0	0	0	0	316.259	337.165	294.799	315.419	315.91
P11413	16	14	145.428	5.67e-07	1;2;3;4;5	5	Glucose-6-phosphate 1-dehydrogenase OS=Homo sapiens OX=9606 GN=G6PD PE=1 SV=4	300.955	329.879	302.191	327.149	315.044	547.899	519.134	487.458	396.245	487.684	356.322	386.672	478.754	233.305	363.763	4932.37	1493.38	3170.18	3182.11	3194.51
P06744	10	10	82.2562	3.44e-06	2;3;4	3	Glucose-6-phosphate isomerase OS=Homo sapiens OX=9606 GN=GPI PE=1 SV=4	4.91306	1.56849	3.15729	4.1608	3.44991	316.234	805.749	258.407	401.002	445.348	80.7337	26.4875	8.84829	3.41241	29.8705	262.721	833.634	262.065	885.155	560.894
P14314	7	5	57.0144	1.1e-07	1;3	2	Glucosidase 2 subunit beta OS=Homo sapiens OX=9606 GN=PRKCSH PE=1 SV=2	80.348	70.7973	73.4746	74.8767	74.8741	138.391	218.043	201.618	177.826	183.969	18.6893	25.0104	43.6684	21.1211	27.1223	344.932	300.527	778.709	557.762	495.483
P00367	7	3	46.7963	0.017793	1;2;3	3	Glutamate dehydrogenase 1, mitochondrial OS=Homo sapiens OX=9606 GN=GLUD1 PE=1 SV=2	36.8372	38.1873	32.6026	31.4458	34.7682	152.164	240.031	43.8814	56.3189	123.099	189.345	185.23	193.432	234.313	200.58	128.729	152.546	17.3998	98.2908	99.2414
A0A0B4J2D5;P0DPI2	2	2	12.5894	0.00495771	2;3	2	Glutamine amidotransferase-like class 1 domain-containing protein 3B, mitochondrial OS=Homo sapiens OX=9606 GN=GATD3B PE=1 SV=1	0	0	0	0	0	3.82817	9.63881	0.516341	8.27884	5.56554	0	0	0	0	0	44.3513	362.687	0.718615	300.863	177.155
P04406;O57672;P04797;P08735;P10096;P16858;P17244;P46406;P51640;Q28554	22	17	205.075	0.000944046	2;3;5;6;7;8;9	7	Glyceraldehyde-3-phosphate dehydrogenase OS=Homo sapiens OX=9606 GN=GAPDH PE=1 SV=3	912.633	869.397	1522.81	1009.05	1078.47	4943.14	3700.9	570.31	5351.29	3641.41	701.579	633.223	678.562	267.092	570.114	5668.41	5862.06	3880.85	4631.13	5010.61
P43304	7	5	51.6008	0.00375245	1;2;3	3	Glycerol-3-phosphate dehydrogenase, mitochondrial OS=Homo sapiens OX=9606 GN=GPD2 PE=1 SV=3	11.5098	7.68518	4.56197	6.2196	7.49415	8.94331	27.7136	22.3912	50.1813	27.3074	0	0	0	0	0	270.001	647.164	63.0176	429.276	352.365
Q9H8Y8	1	1	4.9522	0.0158634	1	1	Golgi reassembly-stacking protein 2 OS=Homo sapiens OX=9606 GN=GORASP2 PE=1 SV=3	0	0	0	0	0	54.798	0	7.71638	66.3147	32.2073	0	0	0	0	0	0	0	0	0	0
Q14451	14	14	95.856	2.49e-07	2;3;4;5;6	5	Growth factor receptor-bound protein 7 OS=Homo sapiens OX=9606 GN=GRB7 PE=1 SV=2	48.7949	36.2432	38.3606	32.3819	38.9451	640.57	1490	397.149	551.689	769.852	23.3392	21.4344	24.2806	15.5932	21.1618	150.148	112.669	45.33	75.985	96.033
Q9HAV7	1	1	6.4795	0.000356375	1	1	GrpE protein homolog 1, mitochondrial OS=Homo sapiens OX=9606 GN=GRPEL1 PE=1 SV=2	0	0	0	0	0	0.302824	60.3993	75.8897	1.17051	34.4406	0	0	0	0	0	58.5002	46.8265	62.3672	51.0542	54.687
Q27975;P08107;P17879;P34930;Q07439;Q27965;Q91233	2	1	10.8392	0.0188792	9	1	Heat shock 70 kDa protein 1 (HSP70-1).	10.901	9.81612	10.0932	6.32394	9.28357	0	0	0	0	0	0	0	0	0	0	0	0	0	0	0
P0DMV9;P0DMV8	20	9	149.862	5.58e-08	1;2;3;5	4	Heat shock 70 kDa protein 1B OS=Homo sapiens OX=9606 GN=HSPA1B PE=1 SV=1	38.2386	30.5748	32.4977	35.1086	34.1049	1165.87	568.107	1183.93	537.083	863.746	34.6568	47.2786	42.4332	65.7692	47.5344	1434.56	1371.43	358.191	1149.95	1078.53
P34931;P02827;P08106;P16627;P55063;Q28222;Q61696;Q91291	7	1	43.0551	0.00251998	1;2;9	3	Heat shock 70 kDa protein 1-like OS=Homo sapiens OX=9606 GN=HSPA1L PE=1 SV=2	0	0	0	0	0	8.99057	2.97763	2.70567	9.27026	5.98603	0	0	0	0	0	42.3205	19.6819	0	22.0837	21.0215
P11142;P08108;P08109;P11503;P19120;P19378;P27541;Q06248;Q90473	22	18	198.454	9.76e-08	1;2;3;4;6;8;9	7	Heat shock cognate 71 kDa protein OS=Homo sapiens OX=9606 GN=HSPA8 PE=1 SV=1	411.907	582.578	645.337	573.004	553.206	2153.03	2113.81	1705.29	1396.81	1842.24	236.266	79.9581	200.707	141.852	164.696	3660.12	2125.23	3089.88	1941.68	2704.23
Q12931	6	4	34.2916	0.000101444	1;2;3	3	Heat shock protein 75 kDa, mitochondrial OS=Homo sapiens OX=9606 GN=TRAP1 PE=1 SV=3	0	0	0	0	0	63.7008	51.0637	24.557	24.2378	40.8898	6.32787	5.55902	7.90652	9.32656	7.27999	320.637	152.913	174.951	43.4952	172.999
P04792	5	5	66.3019	0.00525995	1;2;3;6;7	5	Heat shock protein beta-1 OS=Homo sapiens OX=9606 GN=HSPB1 PE=1 SV=2	277.628	169.029	114.36	325.459	221.619	344.354	1189.58	801.092	82.3923	604.355	1701.97	1657.2	1673.07	1639.01	1667.81	5299.28	2335.88	441.879	3473.07	2887.53
P07900;Q14568;Q58FF6;Q58FG1	36	20	307.307	1.89e-07	1;2;3;4;5;6	6	Heat shock protein HSP 90-alpha OS=Homo sapiens OX=9606 GN=HSP90AA1 PE=1 SV=5	366.62	357.805	338.299	329.331	348.014	1133.07	2382.92	1093.25	1177.69	1446.73	342.536	378.511	386.083	564.025	417.789	2081.5	1851.89	2302.12	2919.3	2288.7
P08238;Q58FF7	29	13	267.682	2.21e-10	1;2;3;4	4	Heat shock protein HSP 90-beta OS=Homo sapiens OX=9606 GN=HSP90AB1 PE=1 SV=4	454.144	444.533	512.71	476.41	471.949	1853.23	2288.74	2201.24	1822.5	2041.43	485.786	618.85	713.135	743.779	640.387	5803.05	3588.74	4697.48	4488.55	4644.46
P51858	3	2	23.271	0.000141755	2	1	Hepatoma-derived growth factor OS=Homo sapiens OX=9606 GN=HDGF PE=1 SV=1	548.851	483.407	558.823	754.39	586.368	185.658	422.773	240.032	787.518	408.995	20.8835	25.715	31.1655	29.8101	26.8935	24.5415	271.49	171.645	257.461	181.284
P09651;Q32P51	11	10	87.6878	4.83e-05	4;5;6;8	4	Heterogeneous nuclear ribonucleoprotein A1 OS=Homo sapiens OX=9606 GN=HNRNPA1 PE=1 SV=5	775.649	746.333	749.775	780.455	763.053	1055.26	925.411	1263.61	2035.59	1319.97	475.053	466.974	547.346	578.818	517.048	2783.03	1176.61	2117.79	2203.57	2070.25
P51991	7	6	57.5623	0.000453123	3;6	2	Heterogeneous nuclear ribonucleoprotein A3 OS=Homo sapiens OX=9606 GN=HNRNPA3 PE=1 SV=2	306.276	320.993	320.15	293.835	310.314	153.464	265.891	337.325	224.252	245.233	493.598	722.08	722.656	369.14	576.868	682.915	549.417	835.865	499.943	642.035
Q14103	4	3	45.4366	3.12e-09	3	1	Heterogeneous nuclear ribonucleoprotein D0 OS=Homo sapiens OX=9606 GN=HNRNPD PE=1 SV=1	0	0	0	0	0	72.1897	191.983	116.374	217.498	149.511	28.2497	12.6832	20.9676	10.2956	18.049	533.599	248.78	176.41	425.411	346.05
P31943	5	1	40.1088	0.00465398	3;8	2	Heterogeneous nuclear ribonucleoprotein H OS=Homo sapiens OX=9606 GN=HNRNPH1 PE=1 SV=4	0	0	0	0	0	21.7171	44.3818	9.99697	24.8841	25.245	0	0	0	0	0	0.859325	75.9566	3.22419	77.4796	39.3799
P61978	7	6	68.7447	8.48e-07	1;2;3	3	Heterogeneous nuclear ribonucleoprotein K OS=Homo sapiens OX=9606 GN=HNRNPK PE=1 SV=1	135.197	147.794	240.286	157.105	170.096	347.622	248.989	404.713	289.982	322.827	28.0357	44.0814	39.7028	17.2433	32.2658	1084.21	403.9	465.607	350.2	575.978
P52272	11	10	104.784	0.000120467	3;5	2	Heterogeneous nuclear ribonucleoprotein M OS=Homo sapiens OX=9606 GN=HNRNPM PE=1 SV=3	392.256	380.587	362.852	348.774	371.117	1151.71	977.476	430.024	554.096	778.326	375.128	377.201	347.084	463.757	390.792	1183.83	994.287	1684.1	1053.41	1228.91
O60506	18	10	137.603	0.000848776	1;2;3	3	Heterogeneous nuclear ribonucleoprotein Q OS=Homo sapiens OX=9606 GN=SYNCRIP PE=1 SV=2	57.5201	55.6335	51.7	58.5955	55.8622	181.106	483.103	85.2849	137.675	221.792	22.971	18.4714	90.5097	14.6365	36.6472	295.997	593.018	124.558	280.232	323.451
O43390	13	7	91.817	0.0173461	2;3	2	Heterogeneous nuclear ribonucleoprotein R OS=Homo sapiens OX=9606 GN=HNRNPR PE=1 SV=1	61.0639	59.0665	57.0809	62.5889	59.95	271.635	347.978	115.038	329.61	266.066	70.1309	72.9782	64.2332	71.0718	69.6035	34.0527	238.963	393.361	307.587	243.491
Q00839	27	18	203.577	3.42e-05	1;2;3;4;8	5	Heterogeneous nuclear ribonucleoprotein U OS=Homo sapiens OX=9606 GN=HNRNPU PE=1 SV=6	785.618	720.242	716.992	722.618	736.367	900.309	1502.91	1232.08	804.79	1110.02	2398.36	4081.98	3162.32	3089.91	3183.14	933.422	1308.99	1941.5	845.753	1257.42
Q9BUJ2	4	4	19.8789	0.0209623	2;3	2	Heterogeneous nuclear ribonucleoprotein U-like protein 1 OS=Homo sapiens OX=9606 GN=HNRNPUL1 PE=1 SV=2	1.4966	1.53932	0.879998	1.77982	1.42393	179.693	49.8936	65.3275	38.1022	83.2541	14.1634	18.4433	14.7415	63.8175	27.7914	248.762	480.207	0.2925	55.1686	196.108
Q1KMD3	8	5	49.6851	0.00122964	1;3	2	Heterogeneous nuclear ribonucleoprotein U-like protein 2 OS=Homo sapiens OX=9606 GN=HNRNPUL2 PE=1 SV=1	83.5658	98.0889	80.9814	80.7938	85.8575	113.18	125.462	138.664	109.605	121.728	180.12	172.563	190.121	80.1194	155.731	321.119	187.713	278.663	177.013	241.127
P09429;B2RPK0	16	9	132.292	0.000176494	3;4;5;6;7;8	6	High mobility group protein B1 OS=Homo sapiens OX=9606 GN=HMGB1 PE=1 SV=3	454.618	477.396	511.982	493.766	484.441	480.558	634.287	220.31	212.999	387.039	2947.4	3423.91	3743.85	3099.19	3303.59	230.377	1244.56	948.818	1319.57	935.832
P26583	8	5	80.3994	0.00411004	3;5;8	3	High mobility group protein B2 OS=Homo sapiens OX=9606 GN=HMGB2 PE=1 SV=2	139.289	137.91	133.308	120.946	132.863	149.353	112.769	26.8956	163.359	113.094	612.225	608.34	607.621	1040.9	717.271	705.63	84.5053	395.766	708.815	473.679
Q13547	6	2	38.2371	0.000556205	3	1	Histone deacetylase 1 OS=Homo sapiens OX=9606 GN=HDAC1 PE=1 SV=1	15.3404	17.8356	19.181	16.3563	17.1783	75.7773	11.7066	14.1214	13.8349	28.86	116.934	115.028	108.714	116.545	114.305	40.5504	13.841	23.6003	15.2267	23.3046
Q92769	4	1	27.757	0.00467762	3	1	Histone deacetylase 2 OS=Homo sapiens OX=9606 GN=HDAC2 PE=1 SV=2	94.3684	67.0031	76.1356	65.6417	75.7872	56.4585	19.2422	38.212	19.4788	33.3479	107.879	102.602	83.5336	179.719	118.433	56.9531	27.8647	91.7156	30.2585	51.698
P16403;P10412;P16402	6	2	69.4268	1.99e-07	3	1	Histone H1.2 OS=Homo sapiens OX=9606 GN=HIST1H1C PE=1 SV=2	223.475	224.166	221.56	212.342	220.386	88.502	95.3283	99.7832	92.6766	94.0725	846.835	808.704	786.126	876.168	829.458	82.9854	40.8265	73.9966	20.5676	54.594
P16401	5	1	50.9542	5.23e-13	3	1	Histone H1.5 OS=Homo sapiens OX=9606 GN=HIST1H1B PE=1 SV=3	0	0	0	0	0	0	0	0	0	0	10.9458	8.69049	14.5558	13.8996	12.0229	0	0	0	0	0
Q71UI9;P0C0S5	3	2	38.4205	4.08e-06	4;5	2	Histone H2A.V OS=Homo sapiens OX=9606 GN=H2AFV PE=1 SV=3	668.268	677.182	695.804	683.913	681.292	314.395	304.923	216.637	72.6957	227.162	5361.57	6009.69	6452.28	7723.9	6386.86	620.563	608.484	122.496	441.355	448.224
Q5QNW6;O60814;P02278;P02279;P02282;P06900;P10853;P10854;P14001;P35067;P57053;P58876;P62807;Q00715;Q93078;Q93079;Q93080;Q99877;Q99879;Q99880	14	2	121.659	2.45e-08	2;3;4;7;8;9	6	Histone H2B type 2-F OS=Homo sapiens OX=9606 GN=HIST2H2BF PE=1 SV=3	213.352	192.871	197.186	219.207	205.654	146.483	311.327	374.754	195.904	257.117	3504.76	3368.43	3386.24	3676.6	3484.01	210.463	187.67	186.664	434.39	254.797
P68431;Q16695;Q6NXT2;Q71DI3	6	1	73.0988	6.14e-08	3;4;5;6;7;8	6	Histone H3.1 OS=Homo sapiens OX=9606 GN=HIST1H3A PE=1 SV=2	0	0	0	0	0	22.2813	11.4141	8.25761	1.61691	10.8925	0	0	0	0	0	71.0806	63.2705	50.4354	48.6576	58.361
P84243	5	2	77.5279	1.66e-06	3;4;5;6;7;8	6	Histone H3.3 OS=Homo sapiens OX=9606 GN=H3F3A PE=1 SV=2	1.56117	0.281762	1.51768	0.537435	0.974512	33.9629	256.414	16.053	20.879	81.8273	2.21115	2.51113	2.57915	0	1.82536	195.146	176.36	523.1	216.801	277.852
P62805;P02304;P02306;P02307;P02308;P02310;P02311;P04915;P08436;P35057;P35059;P40287;P50566;Q27443	11	10	123.536	0.000216935	1;2;3;4;5;6;7;8;9	9	Histone H4 OS=Homo sapiens OX=9606 GN=HIST1H4A PE=1 SV=2	2176.85	383.518	431.895	421.935	853.55	2325.32	7908.75	4152.25	4499.91	4721.56	5352.94	6138.19	4104.83	4492.43	5022.1	3247.32	5679.06	7968.67	7620.78	6128.96
Q4FZB7	1	1	4.2123	9.98e-07	1	1	Histone-lysine N-methyltransferase KMT5B OS=Homo sapiens OX=9606 GN=KMT5B PE=1 SV=5	0	0	0	0	0	52.8701	51.7373	48.5119	53.2682	51.5969	0	0	0	0	0	0	0	0	0	0
Q6YN16	3	2	13.7566	0.00185732	3	1	Hydroxysteroid dehydrogenase-like protein 2 OS=Homo sapiens OX=9606 GN=HSDL2 PE=1 SV=1	31.2123	25.9791	27.887	24.2248	27.3258	83.9376	22.907	223.782	23.0193	88.4114	11.8492	0	5.61724	0.613479	4.51999	45.9754	375.799	41.2668	490.991	238.508
Q6UXS9	1	1	4.975	1.28e-06	3	1	Inactive caspase-12 OS=Homo sapiens OX=9606 GN=CASP12 PE=2 SV=3	19.5444	17.2136	15.1185	14.6937	16.6426	0	0	0	0	0	0	0	0	0	0	0	0	0	0	0
P09529	1	1	9.8404	0.000960421	4	1	Inhibin beta B chain OS=Homo sapiens OX=9606 GN=INHBB PE=1 SV=2	63.5979	53.3626	52.5634	53.7214	55.8113	62.9383	11.6245	33.0501	57.333	41.2365	15.9371	9.16695	13.4263	1.75311	10.0709	4.69615	6.85184	10.3856	4.69931	6.65822
Q15181	7	6	63.1441	2.3e-07	1;2;3	3	Inorganic pyrophosphatase OS=Homo sapiens OX=9606 GN=PPA1 PE=1 SV=2	3.56983	0	1.96974	3.57531	2.27872	42.2344	124.353	59.7887	150.884	94.3151	5.25327	1.90327	3.46998	0.449143	2.76892	633.306	293.293	605.112	418.546	487.564
P17301	3	2	23.2408	0.000933052	3	1	Integrin alpha-2 OS=Homo sapiens OX=9606 GN=ITGA2 PE=1 SV=1	19.8985	15.1107	19.842	17.6208	18.118	2.25054	22.8734	26.0835	21.064	18.0679	152.625	318.907	308.596	659.967	360.024	31.5014	103.518	8.15845	76.0366	54.8037
P53708	1	1	4.2765	6.03e-13	7	1	Integrin alpha-8 OS=Homo sapiens OX=9606 GN=ITGA8 PE=1 SV=3	0	0	0	0	0	102.934	72.4726	56.4766	47.2539	69.7843	0	0	0	0	0	97.5084	105.238	97.8575	136.806	109.353
P06756	1	1	4.4315	8.23e-07	5	1	Integrin alpha-V OS=Homo sapiens OX=9606 GN=ITGAV PE=1 SV=2	28.2867	22.6663	30.7777	23.9417	26.4181	0.176472	2.03102	0	2.61069	1.20454	0	0	0	0	0	0	0	0	0	0
P05556	9	6	81.3545	3.59e-06	3	1	Integrin beta-1 OS=Homo sapiens OX=9606 GN=ITGB1 PE=1 SV=2	363.71	341.706	352.371	363.983	355.442	28.3459	85.6139	47.6079	47.3483	52.229	233.74	187.536	150.403	101.127	168.201	11.6103	31.6165	44.789	18.6019	26.6544
P05362	1	1	5.1769	8.39e-09	1	1	Intercellular adhesion molecule 1 OS=Homo sapiens OX=9606 GN=ICAM1 PE=1 SV=2	0	0	0	0	0	49.5303	39.6581	51.8658	49.2409	47.5738	0	0	0	0	0	0.392346	0	3.41109	0.437565	1.06025
Q12906	10	9	68.7408	0.00994274	1;2;4	3	Interleukin enhancer-binding factor 3 OS=Homo sapiens OX=9606 GN=ILF3 PE=1 SV=3	49.5718	46.4564	47.9741	43.3545	46.8392	105.651	311.595	120.335	73.7329	152.828	83.1152	100.777	12.1649	92.8322	72.2224	466.504	304.739	204.443	144.142	279.957
Q8TAD2	1	1	9.4512	0.0168866	3	1	Interleukin-17D OS=Homo sapiens OX=9606 GN=IL17D PE=2 SV=1	1.39885	0.500192	0.94998	2.87701	1.43151	14.2993	2.65624	1.09142	1.39606	4.86076	0.27618	3.40804	0.251884	0	0.984025	20.6731	50.0784	261.464	1.43699	83.4131
Q05084	2	1	19.3244	0.0457156	4	1	Islet cell autoantigen 1 OS=Homo sapiens OX=9606 GN=ICA1 PE=1 SV=2	0	0	0	0	0	30.7618	0.381125	1.2769	26.3269	14.6867	0	0	0	0	0	0.547788	56.0849	8.23038	0.732258	16.3988
P48735	20	16	162.996	3.02e-08	1;2;3;4	4	Isocitrate dehydrogenase [NADP], mitochondrial OS=Homo sapiens OX=9606 GN=IDH2 PE=1 SV=2	244.045	222.494	248.992	236.5	238.008	530.209	513.384	474.584	420.838	484.754	259.992	384.452	400.158	712.127	439.182	2696.56	2664.07	2068.78	2570.06	2499.87
P14923	4	4	27.6632	0.00281722	2	1	Junction plakoglobin OS=Homo sapiens OX=9606 GN=JUP PE=1 SV=3	0	0	0	0	0	13.2573	44.8374	41.4654	51.3258	37.7215	0	0	0	0	0	2.85199	2.09116	21.8654	7.83963	8.66205
Q53GT1	1	1	4.5205	0.0103089	2	1	Kelch-like protein 22 OS=Homo sapiens OX=9606 GN=KLHL22 PE=1 SV=2	0	0	0	0	0	0	0	0	0	0	1.10284	34.1764	35.7519	37.9742	27.2513	0	0	0	0	0
P19012	14	5	85.6333	8.26e-06	3;9	2	Keratin, type I cytoskeletal 15 OS=Homo sapiens OX=9606 GN=KRT15 PE=1 SV=3	364.258	367.56	350.876	368.596	362.823	239.321	163.283	127.315	179.148	177.267	222.823	210.559	215.374	136.841	196.399	96.0035	122.546	108.901	83.5617	102.753
P05783;P05784	18	12	139.65	7.8e-05	1;2;3;8;9	5	Keratin, type I cytoskeletal 18 OS=Homo sapiens OX=9606 GN=KRT18 PE=1 SV=2	974.2	1141.89	1459.65	1387.88	1240.9	454.269	453.752	549.132	270.765	431.98	482.616	437.73	436.347	494.169	462.715	329.011	257.865	557.838	456.397	400.278
P78386	3	1	18.86	0.000167249	3	1	Keratin, type II cuticular Hb5 OS=Homo sapiens OX=9606 GN=KRT85 PE=1 SV=1	7.54539	7.04465	8.04004	9.71935	8.08736	0	4.47958	4.41927	4.91029	3.45229	27.8076	23.4174	23.1156	22.4428	24.1959	0	0	0	0	0
P04259;P02538;P48668	2	1	16.6371	0.00264008	4	1	Keratin, type II cytoskeletal 6B OS=Homo sapiens OX=9606 GN=KRT6B PE=1 SV=5	12.0438	20.0744	13.8322	18.1074	16.0145	11.7229	2.60758	17.9483	2.29564	8.6436	0	0	0	0	0	30.0772	1.00391	13.025	0.765759	11.218
P08729	10	5	75.6304	3.95e-06	3;4;5;8	4	Keratin, type II cytoskeletal 7 OS=Homo sapiens OX=9606 GN=KRT7 PE=1 SV=5	824.445	980.236	877.561	865.652	886.973	380.2	457.809	130.138	260.092	307.06	10.8789	8.9161	12.0745	17.2747	12.286	247.755	52.5608	36.7088	16.4414	88.3665
P05787	25	16	176.316	0.000324524	3;4;5;8	4	Keratin, type II cytoskeletal 8 OS=Homo sapiens OX=9606 GN=KRT8 PE=1 SV=7	2528.26	2554.97	2198.81	2550.38	2458.1	1159.23	1207.03	895.28	1022.63	1071.04	1023.91	1006.21	1029.25	1128.83	1047.05	829.819	1103.55	281.14	485.282	674.947
Q07666	3	3	19.1759	0.00634913	2;3;7	3	KH domain-containing, RNA-binding, signal transduction-associated protein 1 OS=Homo sapiens OX=9606 GN=KHDRBS1 PE=1 SV=1	42.786	16.7474	15.2153	12.2749	21.7559	9.94061	25.5363	40.0602	29.2748	26.203	10.1474	47.8416	68.767	95.9091	55.6663	57.7698	233.731	193.77	211.128	174.1
P01042	1	1	10.3612	0.00101165	5	1	Kininogen-1 OS=Homo sapiens OX=9606 GN=KNG1 PE=1 SV=2	304.118	286.739	312.98	312.413	304.062	38.5295	1.03477	0	4.41583	10.995	386.939	395.001	485.15	901.837	542.232	0	0	0	0	0
O43278	1	1	11.1548	9.98e-07	3	1	Kunitz-type protease inhibitor 1 OS=Homo sapiens OX=9606 GN=SPINT1 PE=1 SV=2	96.452	95.444	83.967	91.1065	91.7424	159.207	13.9641	13.2496	10.9406	49.3403	0	0	0	0	0	4.07247	2.08737	2.56997	2.61797	2.83694
Q16719	4	3	27.4113	0.0186544	3	1	Kynureninase OS=Homo sapiens OX=9606 GN=KYNU PE=1 SV=1	6.95454	8.99943	11.569	11.7648	9.82196	1.41078	63.0897	55.7714	50.7753	42.7618	0	0	0	0	0	271.794	142.735	6.51518	126.559	136.901
P42166	18	4	121.438	0.00016042	2;3	2	Lamina-associated polypeptide 2, isoform alpha OS=Homo sapiens OX=9606 GN=TMPO PE=1 SV=2	6.374	5.64287	11.1201	7.16698	7.57599	187.376	52.0066	25.4091	43.3574	77.0373	144.082	158.695	163.693	97.9549	141.106	11.3055	46.0738	14.5651	58.7854	32.6825
P42167	15	2	99.4139	0.00485408	2;3	2	Lamina-associated polypeptide 2, isoforms beta/gamma OS=Homo sapiens OX=9606 GN=TMPO PE=1 SV=2	49.4446	52.5056	47.7547	44.5564	48.5653	57.5767	37.88	29.7283	44.7133	42.4746	181.238	170.272	189.227	121.242	165.495	6.06257	49.8737	15.0136	74.6292	36.3948
P24043	2	2	12.8766	7.39e-12	8	1	Laminin subunit alpha-2 OS=Homo sapiens OX=9606 GN=LAMA2 PE=1 SV=4	0	0	0	0	0	22.275	14.4826	7.19115	6.49416	12.6107	0	0	0	0	0	288.704	217.896	158.517	224.573	222.422
Q9P2J5	2	1	9.7306	2.06e-09	2	1	Leucine--tRNA ligase, cytoplasmic OS=Homo sapiens OX=9606 GN=LARS PE=1 SV=2	26268	332.932	12358.5	25186.3	16036.4	0	0	0	0	0	50666.6	24464.9	27709.2	32083.3	33731	0	0	0	0	0
Q14847	2	2	12.2955	1.36e-08	1	1	LIM and SH3 domain protein 1 OS=Homo sapiens OX=9606 GN=LASP1 PE=1 SV=2	0	0	0	0	0	195.095	161.961	106.683	235.336	174.769	0	0	0	0	0	4.59557	55.0854	26.2443	49.4742	33.8499
P11182	2	1	14.5728	0.00051851	3	1	Lipoamide acyltransferase component of branched-chain alpha-keto acid dehydrogenase complex, mitochondrial OS=Homo sapiens OX=9606 GN=DBT PE=1 SV=3	31.3333	33.9679	38.532	34.1497	34.4957	27.7853	34.3607	35.9903	42.9575	35.2734	123.096	138.964	146.377	168.289	144.182	17.0474	80.3135	21.4811	59.307	44.5373
P23141;Q9UKY3	27	23	318.821	1.67e-11	2;3;4;5;6;7;8;9	8	Liver carboxylesterase 1 OS=Homo sapiens OX=9606 GN=CES1 PE=1 SV=2	8945.88	8931.5	9593.49	8971.75	9110.65	10693.7	11314.3	6957.96	9643.07	9652.24	728.564	662.431	684.452	723.513	699.74	941.853	747.978	1332.76	955.329	994.481
P00338;Q9BE24	5	5	46.1855	0.00384584	1;2;3;9	4	L-lactate dehydrogenase A chain OS=Homo sapiens OX=9606 GN=LDHA PE=1 SV=2	0.973551	500.376	1017.62	845.653	591.155	557.85	554.935	499.682	708.336	580.201	1.28048	7.3197	8.84784	5.00288	5.61272	518.55	885.606	841.718	818.988	766.216
P36776	2	1	10.895	0.0388534	2	1	Lon protease homolog, mitochondrial OS=Homo sapiens OX=9606 GN=LONP1 PE=1 SV=2	0	0	0	0	0	0	0	0	0	0	0	0	0	0	0	5.71623	75.1901	30.5809	0	27.8718
P10619	1	1	7.5665	0.000824817	1;2	2	Lysosomal protective protein OS=Homo sapiens OX=9606 GN=CTSA PE=1 SV=2	0	0	0	0	0	37.7072	5.49549	50.4246	52.0466	36.4185	0	0	0	0	0	221.655	6.73337	93.9969	6.4368	82.2054
Q9NZW5	2	2	9.5132	1.69e-09	7	1	MAGUK p55 subfamily member 6 OS=Homo sapiens OX=9606 GN=MPP6 PE=1 SV=2	0	0	0	0	0	55.0903	57.0505	68.8752	56.2902	59.3266	0	0	0	0	0	2.49275	1.24598	1.58821	1.1784	1.62633
P40926	14	10	107.235	0.0298234	2;3;4	3	Malate dehydrogenase, mitochondrial OS=Homo sapiens OX=9606 GN=MDH2 PE=1 SV=3	1152.67	1303.66	1215.15	1371.91	1260.85	1905.12	1057.84	898.067	1523.07	1346.02	2510.06	3600.52	3471.69	3198.97	3195.31	511.816	1983.28	188.221	1655.23	1084.64
Q96LB2	1	1	5.0337	0.0200725	2	1	Mas-related G-protein coupled receptor member X1 OS=Homo sapiens OX=9606 GN=MRGPRX1 PE=1 SV=1	0	0	0	0	0	33.5775	0	0.870343	21.5338	13.9954	0	0	0	0	0	0.568085	661.843	30.5506	20.232	178.298
P16035	2	1	9.3067	0.00107135	3	1	Metalloproteinase inhibitor 2 OS=Homo sapiens OX=9606 GN=TIMP2 PE=1 SV=2	33.5504	39.2037	42.9761	42.7487	39.6197	1.72185	14.6703	15.1511	20.8774	13.1052	7.70453	6.838	9.02134	6.30365	7.46688	0.6751	4.84644	0	3.75607	2.3194
Q2M296	2	2	10.1951	1.67e-07	1	1	Methenyltetrahydrofolate synthase domain-containing protein OS=Homo sapiens OX=9606 GN=MTHFSD PE=1 SV=2	0.630234	1.37857	5.77457	1.62914	2.35313	0	0	0	0	0	16.7807	47.5928	32.9925	34.4613	32.9568	0	0	0	0	0
P51608	3	3	22.4403	0.000368524	3	1	Methyl-CpG-binding protein 2 OS=Homo sapiens OX=9606 GN=MECP2 PE=1 SV=1	353.47	345.357	304.638	317.554	330.255	281.293	131.837	151.435	137.779	175.586	590.964	525.047	529.702	534.877	545.148	57.6169	212.847	119.063	199.861	147.347
Q96RQ3	3	2	13.8631	0.00794722	2;3	2	Methylcrotonoyl-CoA carboxylase subunit alpha, mitochondrial OS=Homo sapiens OX=9606 GN=MCCC1 PE=1 SV=3	9.13097	5.2605	152.783	129.157	74.0829	0	0	0	0	0	47.2665	53.5108	55.5859	51.1933	51.8891	0	28.9426	16.3793	0.333065	11.4137
P27816	18	11	110.07	1.93e-06	1;2;3	3	Microtubule-associated protein 4 OS=Homo sapiens OX=9606 GN=MAP4 PE=1 SV=3	653.598	643.279	680.78	670.932	662.147	390.971	591.599	816.848	784.518	645.984	2202.53	2017.93	2399.77	2126.11	2186.58	673.765	630.591	434.988	657.606	599.238
Q96B49	1	1	7.3963	0.00109913	1;2	2	Mitochondrial import receptor subunit TOM6 homolog OS=Homo sapiens OX=9606 GN=TOMM6 PE=1 SV=1	0	0	0	0	0	12.491	19.3361	14.7637	0	11.6477	0	0	0	0	0	127.23	29.8761	2.28741	51.5249	52.7295
O94826	1	1	4.0465	0.00170456	4	1	Mitochondrial import receptor subunit TOM70 OS=Homo sapiens OX=9606 GN=TOMM70 PE=1 SV=1	22.507	25.0816	22.2651	17.2497	21.7758	6.0254	12.2148	9.7543	0	6.99863	0	0	0	0	0	28.4685	0.948931	23.586	25.376	19.5949
P80192	2	2	9.2469	0.0167498	2	1	Mitogen-activated protein kinase kinase kinase 9 OS=Homo sapiens OX=9606 GN=MAP3K9 PE=1 SV=3	0	0	0	0	0	0.154727	0	1.01526	0.646103	0.454022	0	0	0	0	0	2.47486	186.639	7.73435	0.684361	49.3831
P26038	9	4	66.9914	0.000725782	3	1	Moesin OS=Homo sapiens OX=9606 GN=MSN PE=1 SV=3	80.4075	84.5446	83.1285	94.0357	85.5291	106.597	164.32	109.773	155.893	134.146	35.6988	29.4986	38.8772	27.317	32.8479	30.205	68.093	24.687	100.857	55.9605
Q5T089	2	2	13.0571	5.22e-08	2	1	MORN repeat-containing protein 1 OS=Homo sapiens OX=9606 GN=MORN1 PE=2 SV=2	6317.72	4243.96	5636.78	10011.2	6552.42	0	0	0	0	0	5816.49	4692.32	5302.13	4749.78	5140.18	0	0	0	0	0
Q9NZM1	7	3	57.6381	6.42e-06	3	1	Myoferlin OS=Homo sapiens OX=9606 GN=MYOF PE=1 SV=1	155.886	173.928	161.724	153.808	161.336	322.354	101.231	102.217	94.9262	155.182	14.4774	13.5092	10.4389	19.9555	14.5952	169.577	65.7394	201.957	102.808	135.021
P60660	6	3	61.548	0.00821848	3;4;5;6;7	5	Myosin light polypeptide 6 OS=Homo sapiens OX=9606 GN=MYL6 PE=1 SV=2	1365.01	1535.02	1419.24	1640.05	1489.83	682.356	58.2921	698.943	712.037	537.907	151.524	234.41	198.45	188.299	193.171	47.4987	404.186	252.322	221.065	231.268
P35580	12	4	64.2188	0.000189609	1;4	2	Myosin-10 OS=Homo sapiens OX=9606 GN=MYH10 PE=1 SV=3	92.44	92.8841	86.1131	86.0185	89.3639	14.6956	13.3762	24.6627	6.22151	14.739	26.5204	9.56362	10.411	11.4947	14.4974	13.4386	5.79797	1.98369	12.041	8.31532
P35579;P14105;Q62812	95	73	773.968	1.34e-10	1;2;3;4;5;6;7;8;9	9	Myosin-9 OS=Homo sapiens OX=9606 GN=MYH9 PE=1 SV=4	20812.7	19551.5	24960.3	24193.4	22379.5	2502.72	2883.81	1609.22	2533.5	2382.31	1801.88	1519.82	1557.35	1613.19	1623.06	1513.22	938.542	1399.24	1051.87	1225.72
O14745	2	1	11.3569	0.000276914	1	1	Na(+)/H(+) exchange regulatory cofactor NHE-RF1 OS=Homo sapiens OX=9606 GN=SLC9A3R1 PE=1 SV=4	0	0	0	0	0	47.4103	37.8358	47.9233	9.76012	35.7324	0	0	0	0	0	0.800195	146.544	170.523	150.281	117.037
P15559	4	4	31.4403	1.13e-10	1;2;3	3	NAD(P)H dehydrogenase [quinone] 1 OS=Homo sapiens OX=9606 GN=NQO1 PE=1 SV=1	4.95027	3.05633	5.30487	6.05206	4.84088	86.6823	82.7673	144.448	185.417	124.829	5.82217	3.7009	4.65704	4.22472	4.60121	1304.58	601.079	743.469	462.97	778.023
P28331	2	2	17.508	0.000111886	1;2	2	NADH-ubiquinone oxidoreductase 75 kDa subunit, mitochondrial OS=Homo sapiens OX=9606 GN=NDUFS1 PE=1 SV=3	3.68963	6.66492	14.5256	21.5692	11.6123	0	0	0	0	0	0	0	0	0	0	216.948	330.867	158.955	113.783	205.138
P41227	1	1	5.7193	2.73e-10	1	1	N-alpha-acetyltransferase 10 OS=Homo sapiens OX=9606 GN=NAA10 PE=1 SV=1	0	0	0	0	0	428.767	310.452	400.44	427.599	391.815	0	0	0	0	0	25.6898	13.5341	2.8568	13.7377	13.9546
Q15223	2	2	9.0197	0.000456213	3	1	Nectin-1 OS=Homo sapiens OX=9606 GN=NECTIN1 PE=1 SV=3	37.1685	29.4954	30.0878	28.5867	31.3346	7.68739	54.7148	9.98781	16.907	22.3242	271.341	176.651	242.417	225.549	228.99	14.9425	14.456	0.795273	15.8324	11.5066
Q09666	50	34	322.966	1.41e-06	1;2;3	3	Neuroblast differentiation-associated protein AHNAK OS=Homo sapiens OX=9606 GN=AHNAK PE=1 SV=2	917.858	941.852	869.678	892.693	905.52	747.873	578.865	586.99	478.509	598.059	2628.55	2322.75	2399.85	2230.42	2395.39	707.616	743.365	535.068	1178.08	791.032
Q8N0W4	1	1	4.0217	8.59e-13	7	1	Neuroligin-4, X-linked OS=Homo sapiens OX=9606 GN=NLGN4X PE=1 SV=1	0	0	0	0	0	15.7926	11.2995	10.1696	7.48664	11.1871	0	0	0	0	0	32.1282	26.7386	26.8944	44.2218	32.4957
Q14697	21	20	186.286	2.72e-07	2;3;4;5;6	5	Neutral alpha-glucosidase AB OS=Homo sapiens OX=9606 GN=GANAB PE=1 SV=3	487.513	574.696	530.016	531.429	530.914	1467.55	1793.3	1951.66	1623.52	1709.01	1111.68	1124.8	1172.17	912.231	1080.22	3630.64	1793.07	3721.56	2724.45	2967.43
Q15758	2	2	11.1724	0.000119639	1	1	Neutral amino acid transporter B(0) OS=Homo sapiens OX=9606 GN=SLC1A5 PE=1 SV=2	0	0	0	0	0	349.372	285.362	329.786	350.068	328.647	0	0	0	0	0	0	77.6165	114.218	5.70867	49.3858
P43490	16	13	120.252	0.000195235	2;3;4	3	Nicotinamide phosphoribosyltransferase OS=Homo sapiens OX=9606 GN=NAMPT PE=1 SV=1	176.343	155.009	162.512	146.426	160.072	739.051	726.239	794.242	567.445	706.744	39.8421	52.9982	52.8867	231.541	94.3171	229.65	98.4815	331.876	180.656	210.166
Q5M9Q1	1	1	4.3075	0.00315653	1	1	NKAP-like protein OS=Homo sapiens OX=9606 GN=NKAPL PE=2 SV=3	144.608	197.785	269.001	203.246	203.66	94.6485	87.6199	0.344921	302.21	121.206	0	0	0	0	0	0	0	0	0	0
Q15233	5	3	30.8144	0.00462625	1;5	2	Non-POU domain-containing octamer-binding protein OS=Homo sapiens OX=9606 GN=NONO PE=1 SV=4	0.998223	0.459012	0.38929	0	0.461631	8.42155	9.24504	13.6306	328.787	90.0212	1.39148	1.69276	1.54025	1.05945	1.42098	0	0	0	0	0
Q9GZM8	3	2	13.7689	0.00457357	1	1	Nuclear distribution protein nudE-like 1 OS=Homo sapiens OX=9606 GN=NDEL1 PE=1 SV=1	0	0	0	0	0	1.14266	2.38782	2.15369	0.803936	1.62202	0	0	0	0	0	230.008	175.071	0	48.5923	113.418
Q14980	20	12	101.21	0.00989716	1;2;3	3	Nuclear mitotic apparatus protein 1 OS=Homo sapiens OX=9606 GN=NUMA1 PE=1 SV=2	12.2212	6.06208	12.4769	46.3317	19.273	61.6917	54.7206	38.4306	166.148	80.2476	219.181	32.213	37.334	63.0387	87.9417	45.7851	187.15	518.268	225.425	244.157
P67809	1	1	5.1185	1.1e-07	1	1	Nuclease-sensitive element-binding protein 1 OS=Homo sapiens OX=9606 GN=YBX1 PE=1 SV=3	0	0	0	0	0	71.3925	17.2231	62.2192	74.1919	56.2567	0	0	0	0	0	0	3.4101	1.72906	0.832564	1.49293
P19338	5	4	35.5288	0.00148165	2	1	Nucleolin OS=Homo sapiens OX=9606 GN=NCL PE=1 SV=3	2746.66	2207.22	3458.17	3536.45	2987.13	70.8533	64.1472	95.5802	503.78	183.59	2689.76	2793.59	2611.94	2450.76	2636.51	3.2069	355.31	183.533	289.488	207.884
P12270	4	2	18.1082	0.0137253	2	1	Nucleoprotein TPR OS=Homo sapiens OX=9606 GN=TPR PE=1 SV=3	110.579	101.108	9.18516	8.03761	57.2276	0	7.38039	62.9456	13.8584	21.0461	0	0	0	0	0	0	0	0	0	0
P15531	5	2	59.6748	1.14e-05	3	1	Nucleoside diphosphate kinase A OS=Homo sapiens OX=9606 GN=NME1 PE=1 SV=1	198.894	216.511	171.733	170.017	189.289	26.5033	107.105	19.5087	91.5686	61.1714	3.33503	6.41951	9.73157	0.699621	5.04643	373.618	321.469	105.899	256.359	264.336
P22392	5	2	66.0726	0.00255068	3;4;5	3	Nucleoside diphosphate kinase B OS=Homo sapiens OX=9606 GN=NME2 PE=1 SV=1	0	0	0	0	0	139.905	25.4856	88.1822	109.212	90.6963	45.9607	88.5094	140.806	152.018	106.824	126.574	310.793	184.593	0	155.49
P55209	1	1	5.5695	0.0200132	2	1	Nucleosome assembly protein 1-like 1 OS=Homo sapiens OX=9606 GN=NAP1L1 PE=1 SV=1	0	0	0	0	0	0	0	0	0	0	0	0	0	0	0	1.35181	3.33047	25.9638	205.82	59.1164
Q5VT03	1	1	4.0484	3.47e-06	8	1	NUT family member 2D OS=Homo sapiens OX=9606 GN=NUTM2D PE=3 SV=2	0	0	0	0	0	9.92737	8.89175	4.30313	5.89897	7.2553	0	0	0	0	0	17.8773	16.229	12.2559	17.8276	16.0474
P04181	2	2	14.694	0.00213905	6	1	Ornithine aminotransferase, mitochondrial OS=Homo sapiens OX=9606 GN=OAT PE=1 SV=1	0	0	0	0	0	83.8399	0	72.9945	77.1822	58.5041	0	0	0	0	0	0	0	0	0	0
Q15645	1	1	5.402	0.00297221	4	1	Pachytene checkpoint protein 2 homolog OS=Homo sapiens OX=9606 GN=TRIP13 PE=1 SV=2	49.8455	65.3347	52.8116	59.1808	56.7931	42.0318	11.0565	0	36.1557	22.311	0.643361	0	1.04644	2.00927	0.924768	10.7046	1.41981	0.495559	0	3.15499
P50897	2	2	16.0162	1.01e-06	3	1	Palmitoyl-protein thioesterase 1 OS=Homo sapiens OX=9606 GN=PPT1 PE=1 SV=1	79.0557	86.5104	85.2535	95.8119	86.6579	34.0229	164.184	169.473	169.55	134.307	4.727	4.57984	2.48788	2.61442	3.60229	41.995	127.1	69.4684	61.9754	75.1346
Q9ULN7	1	1	4.2993	0.0259167	3	1	Paraneoplastic antigen-like protein 8B OS=Homo sapiens OX=9606 GN=PNMA8B PE=2 SV=4	0.903584	0.39495	0.770521	0.416858	0.621479	0	17.8199	19.3183	18.9751	14.0283	0	0	0	0	0	43.4998	8.04447	0	8.28432	14.9572
P62937	5	5	57.5832	0.000227957	3	1	Peptidyl-prolyl cis-trans isomerase A OS=Homo sapiens OX=9606 GN=PPIA PE=1 SV=2	64.5371	65.4436	66.3496	59.1109	63.8603	1600.66	173.546	85.6735	458.059	579.484	116.574	110.22	160.834	263.459	162.772	2530.05	1155.3	2522.81	993.229	1800.35
Q00688	3	2	16.1216	0.0436403	4	1	Peptidyl-prolyl cis-trans isomerase FKBP3 OS=Homo sapiens OX=9606 GN=FKBP3 PE=1 SV=1	25.9366	22.8874	24.227	23.486	24.1343	22.4118	0	27.1323	24.0678	18.403	281.892	285.964	284.442	268.322	280.155	0.571992	43.958	110.273	112.566	66.8423
Q02790	5	2	31.3247	0.00555728	1;4;5	3	Peptidyl-prolyl cis-trans isomerase FKBP4 OS=Homo sapiens OX=9606 GN=FKBP4 PE=1 SV=3	0	0	0	0	0	101.273	42.4986	74.5108	0	54.5707	0	0	0	0	0	137.006	41.8171	0.932267	38.9895	54.6862
P30044	5	4	54.6395	4.66e-08	1;2;3	3	Peroxiredoxin-5, mitochondrial OS=Homo sapiens OX=9606 GN=PRDX5 PE=1 SV=4	21.2397	15.3182	12.8552	16.9343	16.5868	181.154	368.392	114.941	445.506	277.498	9.90605	8.42259	9.80352	3.87293	8.00127	1299.56	551.638	355.32	514.385	680.227
P30041	4	4	26.8517	1.18e-06	1;2	2	Peroxiredoxin-6 OS=Homo sapiens OX=9606 GN=PRDX6 PE=1 SV=3	0.607346	5.43306	11.2431	12.8776	7.54026	54.4396	82.366	78.19	72.336	71.8329	0	0	0	0	0	1033.89	553.772	56.1487	546.381	547.547
P51659	6	4	37.5645	3.34e-05	2;3	2	Peroxisomal multifunctional enzyme type 2 OS=Homo sapiens OX=9606 GN=HSD17B4 PE=1 SV=3	0.493695	0.625629	0	4.8156	1.48373	9.98235	21.1158	66.9445	18.0212	29.016	75.4112	98.9865	108.374	91.0802	93.463	22.2818	326.982	386.009	388.963	281.059
P30086	6	5	51.2804	9.74e-09	1;2;3	3	Phosphatidylethanolamine-binding protein 1 OS=Homo sapiens OX=9606 GN=PEBP1 PE=1 SV=3	11.6522	12.7971	12.2908	13.5273	12.5669	17.7369	31.971	18.3962	31.4657	24.8925	6.71546	18.38	14.7108	11.488	12.8236	261.556	365.072	468.624	241.58	334.208
Q16822	9	5	59.1283	0.000176208	2;3	2	Phosphoenolpyruvate carboxykinase [GTP], mitochondrial OS=Homo sapiens OX=9606 GN=PCK2 PE=1 SV=4	134.274	110.974	117.039	104.454	116.685	35.7268	52.8125	66.5797	55.7015	52.7051	465.544	387.263	369.186	385.923	401.979	43.5165	177.422	264.76	175.5	165.3
P00558	23	17	199.405	5.74e-06	1;2;3;4	4	Phosphoglycerate kinase 1 OS=Homo sapiens OX=9606 GN=PGK1 PE=1 SV=3	274.427	330.344	650.115	671.538	481.606	1326.6	3939.98	1570.92	2949.32	2446.7	499.902	356.862	377.942	438.208	418.228	2665.81	3680.15	2493.78	2605.11	2861.21
P18669;Q8N0Y7	4	4	25.4007	2.56e-10	1;2	2	Phosphoglycerate mutase 1 OS=Homo sapiens OX=9606 GN=PGAM1 PE=1 SV=2	55.0321	28.719	40.3818	44.4375	42.1426	120.38	345.387	294.957	473.52	308.561	0.341777	0	0.956126	0.871552	0.542364	386.083	815.155	496.445	939.521	659.301
Q16720	2	1	8.4759	0.00930231	1	1	Plasma membrane calcium-transporting ATPase 3 OS=Homo sapiens OX=9606 GN=ATP2B3 PE=1 SV=3	0	0	0	0	0	0.73016	2.90081	39.1015	14.6178	14.3376	0	0	0	0	0	8.60441	19.1429	0	18.2735	11.5052
Q8NC51	3	2	16.2898	7.8e-05	1;4	2	Plasminogen activator inhibitor 1 RNA-binding protein OS=Homo sapiens OX=9606 GN=SERBP1 PE=1 SV=2	39.3342	42.0305	35.777	35.5981	38.1849	162.373	138.009	187.573	163.527	162.871	76.0958	72.5353	73.8526	76.1541	74.6594	157.825	101.043	44.9275	111.824	103.905
Q9H4M7	1	1	4.4324	0.0245944	3	1	Pleckstrin homology domain-containing family A member 4 OS=Homo sapiens OX=9606 GN=PLEKHA4 PE=1 SV=2	9.70406	11.7938	8.07385	9.53808	9.77745	0	5.22227	4.69246	5.96391	3.96966	18.2237	10.1884	27.3041	31.9574	21.9184	7.2723	0.144509	0	7.74054	3.78934
Q9UHX1	1	1	6.5254	9.24e-05	1;2	2	Poly(U)-binding-splicing factor PUF60 OS=Homo sapiens OX=9606 GN=PUF60 PE=1 SV=1	0	0	0	0	0	0	0	0	0	0	0	0	0	0	0	229.338	106.625	93.137	135.985	141.271
P0CG47;P0CG48;P62987	7	1	66.2144	0.00805448	1;2;3	3	Polyubiquitin-B OS=Homo sapiens OX=9606 GN=UBB PE=1 SV=1	0	0	0	0	0	3.20434	4.73003	1.04482	0	2.2448	0	0	0	0	0	28.4536	21.276	23.567	0	18.3241
A5A3E0	19	3	184.667	0.00466215	2;3;4;5;7;8	6	POTE ankyrin domain family member F OS=Homo sapiens OX=9606 GN=POTEF PE=1 SV=2	34.3576	33.9387	39.6993	266.249	93.5611	39.7963	2.90689	10.4593	9.99839	15.7902	36.0961	32.0983	45.7995	41.7917	38.9464	2.62076	9.39116	3.86475	10.6035	6.62005
Q00889	1	1	10.2112	0.0335097	3	1	Pregnancy-specific beta-1-glycoprotein 6 OS=Homo sapiens OX=9606 GN=PSG6 PE=2 SV=1	36.7737	42.4086	45.6854	50.7145	43.8956	0	22.0919	24.0116	23.0188	17.2806	76.0607	94.9181	118.669	136.204	106.463	18.7399	59.3727	98.5335	49.1231	56.4423
P07737	6	6	43.1117	1.99e-07	1;2	2	Profilin-1 OS=Homo sapiens OX=9606 GN=PFN1 PE=1 SV=2	18.1412	24.7765	40.5673	38.6732	30.5396	563.1	437.408	83.2706	579.857	415.909	16.6682	18.3706	13.3934	12.7972	15.3074	2816.57	1158.21	1411.03	1009.62	1598.86
P35232	5	5	45.1439	6.78e-07	1;2;3	3	Prohibitin OS=Homo sapiens OX=9606 GN=PHB PE=1 SV=1	50.4592	51.5465	72.4766	62.8558	59.3345	18.4552	113.061	107.89	103.631	85.7593	0	4.18365	2.42005	1.44184	2.01138	392.444	343.578	379.322	237.524	338.217
Q99623	9	7	69.7307	2.61e-06	1;2;3	3	Prohibitin-2 OS=Homo sapiens OX=9606 GN=PHB2 PE=1 SV=2	24.194	26.0968	30.7631	25.3818	26.6089	259.786	100.706	98.2281	92.3135	137.758	3.90715	2.54787	3.62038	30.2995	10.0937	674.494	505.4	1135.16	340.741	663.948
Q9UQ80	4	1	29.7635	0.0125756	3	1	Proliferation-associated protein 2G4 OS=Homo sapiens OX=9606 GN=PA2G4 PE=1 SV=3	0	0	0	0	0	9.17535	2.23887	0.949218	3.57772	3.98529	0	0	0	0	0	14.2349	75.3922	0	209.878	74.8763
P79522	2	2	8.6738	1.04e-13	7	1	Proline-rich protein 3 OS=Homo sapiens OX=9606 GN=PRR3 PE=1 SV=2	0	0	0	0	0	22.5441	26.0956	19.0166	21.9904	22.4117	0	0	0	0	0	4.27124	3.23569	2.92117	2.30418	3.18307
P07602	1	1	6.9683	2.34e-09	1;2	2	Prosaposin OS=Homo sapiens OX=9606 GN=PSAP PE=1 SV=2	0.172009	0	0.320297	1.36704	0.464838	83.8799	79.9566	77.6395	93.2417	83.6794	0	0	0	0	0	126.32	116.487	112.961	21.0051	94.1933
Q9UL46	5	5	38.2922	0.00625195	3;4	2	Proteasome activator complex subunit 2 OS=Homo sapiens OX=9606 GN=PSME2 PE=1 SV=4	79.0303	77.9708	82.1797	88.4708	81.9129	869.451	98.9104	127.6	431.744	381.927	25.2626	37.0813	50.0439	61.5865	43.4936	87.6879	428.036	154.959	222.594	223.319
P25788	2	1	15.5519	0.0425427	3	1	Proteasome subunit alpha type-3 OS=Homo sapiens OX=9606 GN=PSMA3 PE=1 SV=2	0	0	0	0	0	45.3433	0.636037	0.724394	1.17505	11.9697	2.91319	3.1747	0.41855	0	1.62661	12.8028	3.65835	258.19	3.29651	69.4869
O14818;Q8TAA3	5	3	35.3521	7.07e-08	1;2;3	3	Proteasome subunit alpha type-7 OS=Homo sapiens OX=9606 GN=PSMA7 PE=1 SV=1	0.73563	0.877679	1.47508	2.66431	1.43817	44.9321	40.8947	37.2599	76.7065	49.9483	16.1147	11.5806	12.8442	15.3014	13.9602	21.8594	31.0462	57.9254	58.1034	42.2336
P20618	2	1	12.8618	0.00036494	2	1	Proteasome subunit beta type-1 OS=Homo sapiens OX=9606 GN=PSMB1 PE=1 SV=2	0	0	0	0	0	25.6936	0	35.8408	80.7952	35.5824	0	0	0	0	0	33.9649	68.7671	11.1121	74.112	46.989
Q8NFV4	2	2	17.8511	0.0262679	2;3	2	Protein ABHD11 OS=Homo sapiens OX=9606 GN=ABHD11 PE=1 SV=1	0	0	0	0	0	0	16.9408	26.7868	16.0786	14.9515	0	0	0	0	0	4.85597	64.8462	0	92.5176	40.555
P30101	17	13	166.164	7.11e-10	1;2;3;4;9	5	Protein disulfide-isomerase A3 OS=Homo sapiens OX=9606 GN=PDIA3 PE=1 SV=4	380.098	398.632	401.004	532.399	428.033	2344.34	1855.76	1574.63	2032.35	1951.77	183.58	233.46	189.109	152.451	189.65	2316.08	1422.73	2357.04	1821.04	1979.22
P13667	10	8	72.5013	2.28e-07	2;3;6	3	Protein disulfide-isomerase A4 OS=Homo sapiens OX=9606 GN=PDIA4 PE=1 SV=2	36.2654	32.5128	31.62	33.7552	33.5383	423.256	491.5	296.563	678.878	472.549	27.8496	25.4981	27.4118	26.864	26.9059	136.244	610.657	340.058	177.841	316.2
Q15084	6	4	46.5704	7.06e-13	1;2;6	3	Protein disulfide-isomerase A6 OS=Homo sapiens OX=9606 GN=PDIA6 PE=1 SV=1	0.163224	0.0747722	0.110462	0.483207	0.207917	350.129	504.772	327.297	466.071	412.067	0.0272787	0.11461	0.039219	0.0161593	0.0493166	570.894	462.78	148.888	463.514	411.519
P07237	20	17	160.907	3.14e-09	1;2;3;4;5	5	Protein disulfide-isomerase OS=Homo sapiens OX=9606 GN=P4HB PE=1 SV=3	349.512	324.205	314.06	329.1	329.219	1933.14	2211.35	1639	1724.26	1876.94	494.997	528.267	567.541	423.384	503.548	1748.95	1943.94	3330.45	2007.76	2257.77
Q9BPY3	1	1	4.2701	9.44e-11	2	1	Protein FAM118B OS=Homo sapiens OX=9606 GN=FAM118B PE=1 SV=1	1770.22	222.347	465.367	2078.97	1134.23	0	0	0	0	0	641.081	384.1	413.427	388.032	456.66	0	0	0	0	0
Q9P258	8	6	71.3752	0.00168816	1;2;3	3	Protein RCC2 OS=Homo sapiens OX=9606 GN=RCC2 PE=1 SV=2	55.5199	64.1842	64.181	73.1195	64.2511	65.2551	114.403	154.075	122.303	114.009	380.984	386.057	385.385	155.374	326.95	353.646	184.452	76.1555	206.148	205.1
P31949;O60417;P24480;P50543;Q9UDP3	3	3	22.1962	1.8e-05	2;3;8;9	4	Protein S100-A11 OS=Homo sapiens OX=9606 GN=S100A11 PE=1 SV=2	60.2582	11.452	108.652	65.0278	61.3475	481.759	117.763	347.307	299.632	311.615	2.42281	0	0.295998	2.78101	1.37495	48.1791	411.262	193.168	32.4599	171.267
Q99584	1	1	6.0346	0.00439435	3	1	Protein S100-A13 OS=Homo sapiens OX=9606 GN=S100A13 PE=1 SV=1	0	0	0	0	0	0	0	0	0	0	24.4846	21.7256	20.3587	0	16.6422	0	0	0	0	0
Q86SG5;P31151	2	2	21.3641	3.36e-06	3	1	Protein S100-A7A OS=Homo sapiens OX=9606 GN=S100A7A PE=1 SV=3	0	0	0	0	0	475.101	266.46	24.4774	258.023	256.015	0	0	0	0	0	2.59436	18.5408	2.44836	21.5942	11.2944
P05109	4	4	66.75	4.42e-08	3;5;6	3	Protein S100-A8 OS=Homo sapiens OX=9606 GN=S100A8 PE=1 SV=1	555.255	581.881	598.932	605.879	585.487	5372.96	3746.17	5590.58	6501.11	5302.71	84.6812	69.6276	80.2997	129.086	90.9235	721.284	156.118	472.642	228.402	394.611
P06702	6	6	99.1051	1.79e-05	2;3;4;5;8;9	6	Protein S100-A9 OS=Homo sapiens OX=9606 GN=S100A9 PE=1 SV=1	941.064	954.555	266.17	239.627	600.354	5541.47	5740.12	3622.6	1237.7	4035.47	102.667	81.4387	83.9203	111.34	94.8415	311.844	636.02	832.291	307.567	521.93
P25815	2	1	20.7778	0.000197739	3	1	Protein S100-P OS=Homo sapiens OX=9606 GN=S100P PE=1 SV=2	2.21748	1.14907	1.75766	1.84607	1.74257	66.1364	83.6996	88.4174	83.3142	80.3919	0	0	0	0	0	37.7692	0	27.3061	1.08045	16.5389
Q99497	4	3	28.9228	3.77e-06	1;8	2	Protein/nucleic acid deglycase DJ-1 OS=Homo sapiens OX=9606 GN=PARK7 PE=1 SV=2	0	0	0	0	0	72.8649	63.3823	101.181	60.2216	74.4125	0	0	0	0	0	307.774	193.237	29.908	11.3494	135.567
P21980	1	1	5.3117	9.84e-06	1	1	Protein-glutamine gamma-glutamyltransferase 2 OS=Homo sapiens OX=9606 GN=TGM2 PE=1 SV=2	101.121	121.41	133.378	181.441	134.338	0	5.54818	0.584002	0.244985	1.59429	0	0	0	0	0	0	0	0	0	0
Q9Y5H0	1	1	4.8279	0.012678	3	1	Protocadherin gamma-A3 OS=Homo sapiens OX=9606 GN=PCDHGA3 PE=2 SV=2	0	0	0	0	0	20.7488	75.9261	10.0777	0	26.6881	0	0	0	0	0	0.730851	0.446815	1.37492	7.47749	2.50752
Q9Y5G4	1	1	4.0719	1.32e-11	7	1	Protocadherin gamma-A9 OS=Homo sapiens OX=9606 GN=PCDHGA9 PE=2 SV=1	0	0	0	0	0	20.3547	15.6312	11.5331	12.2902	14.9523	0	0	0	0	0	36.5304	33.6342	42.059	41.0607	38.3211
Q719I0	1	1	5.4972	0.00885484	3	1	Putative activator of 90 kDa heat shock protein ATPase homolog 2 OS=Homo sapiens OX=9606 GN=AHSA2P PE=5 SV=2	31.8512	32.8254	36.1329	26.8842	31.9234	1.44515	37.308	31.7492	37.9972	27.1249	68.2932	63.3545	65.9075	79.4401	69.2488	0	0	0	0	0
Q5VTE0;P02993;P04720;P10126;P13549;P20001;P27706;Q90835	29	3	263.662	1.58e-06	1;2;3;4;5;6;7;8;9	9	Putative elongation factor 1-alpha-like 3 OS=Homo sapiens OX=9606 GN=EEF1A1P5 PE=5 SV=1	38.6962	30.1707	21.7563	21.915	28.1345	157.929	147.862	139.455	135.507	145.188	44.0341	32.4805	48.717	44.1606	42.348	60.8657	28.6139	38.0312	40.6156	42.0316
Q58FG0	5	2	49.0176	0.000398785	3;4	2	Putative heat shock protein HSP 90-alpha A5 OS=Homo sapiens OX=9606 GN=HSP90AA5P PE=2 SV=1	160.682	176.223	180.661	187.295	176.215	212.532	192.258	200.277	179.775	196.211	119.212	92.5628	139.577	113.331	116.171	129.666	143.01	93.0521	143.519	127.312
Q49A26	1	1	5.0031	8.07e-12	2	1	Putative oxidoreductase GLYR1 OS=Homo sapiens OX=9606 GN=GLYR1 PE=1 SV=4	4482.97	517.692	3238.43	6008.7	3561.95	0	0	0	0	0	4525.55	3824.23	3662.49	3641.88	3913.54	0	0	0	0	0
Q92928	3	1	20.7152	3.49e-09	1;2	2	Putative Ras-related protein Rab-1C OS=Homo sapiens OX=9606 GN=RAB1C PE=5 SV=2	125.404	91.1178	218.358	327.71	190.647	0	0.490684	0.633218	2.53915	0.915763	0	0	0	0	0	0	0	0	0	0
P11498	2	1	14.4967	0.00151004	3	1	Pyruvate carboxylase, mitochondrial OS=Homo sapiens OX=9606 GN=PC PE=1 SV=2	6.54066	3.3876	6.80881	6.38792	5.78125	4.65661	0.398676	0.258194	0.519653	1.45828	21.6926	22.0806	24.7296	27.2727	23.9439	5.06517	0	1.39672	9.75998	4.05547
P14618;O18919;P11974;P11979;P11980;P11981;P14786;P52480	38	31	355.487	0.00117149	1;2;3;5;6;7;8;9	8	Pyruvate kinase PKM OS=Homo sapiens OX=9606 GN=PKM PE=1 SV=4	3323	789.609	804.867	1044.51	1490.5	3267.03	3875.34	9175.92	3235.2	4888.37	2597.66	3085.55	3026.99	2309.21	2754.85	11135.2	7176.78	4787	6200.97	7324.99
P50395	11	9	66.7787	1.31e-06	1;2;3	3	Rab GDP dissociation inhibitor beta OS=Homo sapiens OX=9606 GN=GDI2 PE=1 SV=2	24.8224	4.62399	5.85353	40.0108	18.8277	60.2706	103.482	183.258	159.522	126.633	5.29519	8.31793	4.7752	1.72959	5.02948	599.511	757.553	608.22	396.794	590.52
P46940	4	3	19.3912	0.00903505	2	1	Ras GTPase-activating-like protein IQGAP1 OS=Homo sapiens OX=9606 GN=IQGAP1 PE=1 SV=1	0	0	0	0	0	2.56551	1.49259	203.679	272.701	120.109	13.9322	3.13579	4.35002	4.00164	6.35491	3.3691	153.148	318.384	385.683	215.146
P62820;P61006	6	3	37.4056	8.61e-05	1;2;3	3	Ras-related protein Rab-1A OS=Homo sapiens OX=9606 GN=RAB1A PE=1 SV=3	1.32391	1.41682	0.515833	1.05027	1.07671	187.964	147.96	107.715	203.859	161.874	4.29782	12.3684	16.8926	0	8.38972	10.4711	28.9206	4.35394	3.43946	11.7963
Q9H0U4	3	1	22.6018	0.0043209	1;2	2	Ras-related protein Rab-1B OS=Homo sapiens OX=9606 GN=RAB1B PE=1 SV=1	5.99193	5.50076	8.95121	3.92315	6.09176	2.58647	26.9213	39.2458	160.626	57.3449	0	0	0	0	0	297.087	240.325	1.40742	54.4011	148.305
A6NIZ1;P61224;P62834	1	1	7.7515	0.0010017	2	1	Ras-related protein Rap-1b-like protein OS=Homo sapiens OX=9606 PE=2 SV=1	0	0	0	0	0	0	0	0	0	0	0.0361458	4.54617	7.22347	10.344	5.53746	4.09295	121.93	89.7403	90.0402	76.4508
P04626	17	12	125.464	6.24e-09	1;2;3;4;8	5	Receptor tyrosine-protein kinase erbB-2 OS=Homo sapiens OX=9606 GN=ERBB2 PE=1 SV=1	2056.41	2115.64	2189.71	2210.08	2142.96	740.566	732.194	591.188	930.298	748.561	208.595	150.697	205.094	311.283	218.917	366.09	269.976	301.288	394.617	332.993
Q9UQ26	1	1	8.3994	3.33e-16	7	1	Regulating synaptic membrane exocytosis protein 2 OS=Homo sapiens OX=9606 GN=RIMS2 PE=1 SV=2	0	0	0	0	0	66.9049	47.8784	42.1807	42.3042	49.817	0	0	0	0	0	0	0	0	0	0
Q92900	1	1	4.4595	3.96e-05	2	1	Regulator of nonsense transcripts 1 OS=Homo sapiens OX=9606 GN=UPF1 PE=1 SV=2	0	0	0	0	0	0	0	0	0	0	27.8549	48.1612	55.1936	49.3265	45.1341	0	0	0	0	0
P40938	1	1	4.7596	9.37e-08	8	1	Replication factor C subunit 3 OS=Homo sapiens OX=9606 GN=RFC3 PE=1 SV=2	0	0	0	0	0	1.22788	1.3262	0.115374	0.387848	0.764325	0	0	0	0	0	7.1884	5.85147	6.92682	3.73661	5.92582
Q15293	1	1	6.1116	0.000365852	1	1	Reticulocalbin-1 OS=Homo sapiens OX=9606 GN=RCN1 PE=1 SV=1	3.08751	8.88057	12.2901	17.2334	10.3729	12.2832	51.1422	59.7579	50.1751	43.3396	0	0	0	0	0	0	0	0	0	0
Q8NET4	1	1	4.0972	2.22e-16	8	1	Retrotransposon Gag-like protein 9 OS=Homo sapiens OX=9606 GN=RTL9 PE=1 SV=1	0	0	0	0	0	13.4673	16.1397	16.6763	14.7888	15.268	0	0	0	0	0	30.6705	22.694	22.1776	29.3768	26.2297
O76021	3	3	16.6212	0.00168709	2	1	Ribosomal L1 domain-containing protein 1 OS=Homo sapiens OX=9606 GN=RSL1D1 PE=1 SV=3	14.2726	119.954	3.5081	13.5533	37.822	51.4237	74.6748	71.5847	183.794	95.3692	0	0	0	0	0	0.209128	46.7928	83.1086	79.8283	52.4847
Q96E39;P38159	3	2	19.8095	0.0179829	2	1	RNA binding motif protein, X-linked-like-1 OS=Homo sapiens OX=9606 GN=RBMXL1 PE=1 SV=1	32.9664	30.3398	0	9.81286	18.2798	41.6215	81.8314	38.978	193.225	88.914	0	0	0	0	0	3.03515	0.79764	191.147	263.246	114.556
O75995	1	1	4.227	5.42e-10	7	1	SAM and SH3 domain-containing protein 3 OS=Homo sapiens OX=9606 GN=SASH3 PE=1 SV=2	0	0	0	0	0	10.8669	4.58506	7.79104	2.14011	6.34578	0	0	0	0	0	51.8174	54.9608	50.6475	44.3461	50.4429
P16615	12	7	75.0974	0.00123179	1;2;3	3	Sarcoplasmic/endoplasmic reticulum calcium ATPase 2 OS=Homo sapiens OX=9606 GN=ATP2A2 PE=1 SV=1	362.806	420.514	532.732	391.358	426.853	340.74	435.605	614.557	470.387	465.322	263.628	137.925	196.245	174.142	192.985	433.216	218.146	268.953	359.512	319.957
Q8WVM8	1	1	5.03	0.0254145	1	1	Sec1 family domain-containing protein 1 OS=Homo sapiens OX=9606 GN=SCFD1 PE=1 SV=4	0	0	0	0	0	1.60621	0	6.02941	21.3189	7.23863	0	0	0	0	0	7.25943	3.42017	412.236	1.66225	106.144
Q9NVA2	3	2	20.0563	0.00076255	3	1	Septin-11 OS=Homo sapiens OX=9606 GN=SEPTIN11 PE=1 SV=3	51.886	49.5664	53.0507	63.9949	54.6245	16.2515	41.7952	44.4835	59.6518	40.5455	132.985	122.055	108.826	160.588	131.113	34.4966	64.9784	39.8964	45.6318	46.2508
Q16181	6	1	37.7521	0.00218091	3;7	2	Septin-7 OS=Homo sapiens OX=9606 GN=SEPTIN7 PE=1 SV=2	0	0	0	0	0	0	0	0	0	0	0	153.508	199.143	262.401	153.763	0	0	0	0	0
Q9UHD8	5	2	41.802	0.00228107	2;3	2	Septin-9 OS=Homo sapiens OX=9606 GN=SEPTIN9 PE=1 SV=2	68.4735	3.25162	2.72102	1.99262	19.1097	3.06536	3.82492	6.28731	5.60697	4.69614	91.2027	112.412	108.595	94.2652	101.619	2.91095	0.399917	18.0951	0.650241	5.51404
P34897	9	8	67.0463	7.96e-07	3;4	2	Serine hydroxymethyltransferase, mitochondrial OS=Homo sapiens OX=9606 GN=SHMT2 PE=1 SV=3	6.53259	16.3301	12.217	4.65525	9.93373	75.1463	275.333	138.222	143.902	158.151	33.2754	9.68729	37.2373	43.0059	30.8015	857.804	417.452	454.961	662.577	598.198
Q07955	2	2	13.7829	0.00228537	1;2	2	Serine/arginine-rich splicing factor 1 OS=Homo sapiens OX=9606 GN=SRSF1 PE=1 SV=2	1.18977	0.186049	1.08114	0	0.614241	1.79671	0.425207	0.712245	0	0.733541	0	0	0	0	0	156.693	25.7156	0.745692	81.1943	66.0872
P84103	2	2	13.9473	1.9e-06	2	1	Serine/arginine-rich splicing factor 3 OS=Homo sapiens OX=9606 GN=SRSF3 PE=1 SV=1	4.05333	22.349	57.3396	1.37377	21.2789	75.7787	206.082	55.0768	183.137	130.019	0	0	0	0	0	216.668	364.955	206.437	236.6	256.165
P30153	5	5	25.8094	0.0170691	1;2	2	Serine/threonine-protein phosphatase 2A 65 kDa regulatory subunit A alpha isoform OS=Homo sapiens OX=9606 GN=PPP2R1A PE=1 SV=4	619.727	494.322	1123.28	1046.16	820.871	1.2241	128.808	75.9231	55.2308	65.2964	110.938	103.817	75.5749	33.0692	80.8499	26.0935	262.541	126.569	313.374	182.145
P62140	6	2	51.4894	0.00907278	2;3	2	Serine/threonine-protein phosphatase PP1-beta catalytic subunit OS=Homo sapiens OX=9606 GN=PPP1CB PE=1 SV=3	0.612291	0.482661	1.75714	0	0.713024	0	35.6113	59.5977	30.4926	31.4254	0	0	0	0	0	2.77186	100.201	198.849	41.6365	85.8647
P29508	3	1	14.6787	0.00441465	3	1	Serpin B3 OS=Homo sapiens OX=9606 GN=SERPINB3 PE=1 SV=2	0.919856	0	1.63006	1.56826	1.02954	4.9486	40.0952	43.326	44.5252	33.2237	0	0.0866144	0.526934	10.4824	2.77399	3.82924	2.97203	0.731111	8.91165	4.11101
P48594	3	2	21.6923	0.0192073	3	1	Serpin B4 OS=Homo sapiens OX=9606 GN=SERPINB4 PE=1 SV=2	0.47504	0.347605	0.411821	0.261988	0.374113	26.1965	6.32993	5.71912	3.92237	10.542	0	0	0	0	0	0	0.324161	52.8391	2.58308	13.9366
P50454	3	3	21.5366	8.19e-06	1;2;4	3	Serpin H1 OS=Homo sapiens OX=9606 GN=SERPINH1 PE=1 SV=2	0	0	0	0	0	24.2107	7.6595	6.9493	12.8055	12.9063	0	0	0	0	0	346.605	449.873	241.84	121.516	289.958
Q9UQR0	1	1	4.2096	0.000276073	2	1	Sex comb on midleg-like protein 2 OS=Homo sapiens OX=9606 GN=SCML2 PE=1 SV=1	0	0	0	0	0	0	0	0	0	0	112.845	192.88	242.366	375.571	230.916	0	0	0	0	0
Q96B97	3	2	14.0294	0.0387678	3	1	SH3 domain-containing kinase-binding protein 1 OS=Homo sapiens OX=9606 GN=SH3KBP1 PE=1 SV=2	15.7898	19.7153	20.9969	20.4721	19.2435	16.441	70.8632	215.11	63.5631	91.4943	57.1154	50.7463	63.3898	47.3103	54.6404	39.7615	51.2532	179.227	90.0718	90.0783
O75911	1	1	9.6286	0.000798239	4	1	Short-chain dehydrogenase/reductase 3 OS=Homo sapiens OX=9606 GN=DHRS3 PE=1 SV=2	36.8789	46.375	39.7514	37.4813	40.1217	0	0	0	0	0	0	0	0	0	0	2.33081	2.24143	3.38305	0.878747	2.20851
Q9UHB9	2	2	9.5249	0.000364783	1;2	2	Signal recognition particle subunit SRP68 OS=Homo sapiens OX=9606 GN=SRP68 PE=1 SV=2	0	0	0	0	0	38.9336	38.9248	43.9318	10.5298	33.08	0	0	0	0	0	0.561321	98.7688	88.3347	60.3621	62.0067
Q9H7L9	2	2	16.359	0.000368233	4;5;6;7;8	5	Sin3 histone deacetylase corepressor complex component SDS3 OS=Homo sapiens OX=9606 GN=SUDS3 PE=1 SV=2	0	0	0	0	0	627.35	4.39914	1221.4	630.368	620.879	0	0	0	0	0	4.36922	2193.76	2570.65	2338.32	1776.78
Q04837	5	4	29.3055	1.53e-11	1;2	2	Single-stranded DNA-binding protein, mitochondrial OS=Homo sapiens OX=9606 GN=SSBP1 PE=1 SV=1	4.62286	6.64297	7.1042	6.58915	6.23979	32.1938	28.7964	42.3433	52.2598	38.8983	0	0	0	0	0	76.9719	166.847	169.967	80.6995	123.621
P63162;P14678	1	1	5.639	0.0196292	5	1	Small nuclear ribonucleoprotein-associated protein N OS=Homo sapiens OX=9606 GN=SNRPN PE=1 SV=1	0	0.991574	0	2.31751	0.82727	66.3988	1214.01	8.60936	0	322.253	29.5306	38.5948	48.1686	98.2709	53.6412	74.4062	28.9495	35.4203	380.368	129.786
P05023	8	8	45.3139	2.31e-09	1;2	2	Sodium/potassium-transporting ATPase subunit alpha-1 OS=Homo sapiens OX=9606 GN=ATP1A1 PE=1 SV=1	0.044027	0.353716	0.468144	0.263214	0.282275	167.746	150.491	232.199	194.906	186.335	0	0	0	0	0	714.184	314.398	62.6277	947.846	509.764
Q96R06	1	1	4.8045	5.33e-15	8	1	Sperm-associated antigen 5 OS=Homo sapiens OX=9606 GN=SPAG5 PE=1 SV=2	0	0	0	0	0	160.505	147	114.307	101.97	130.946	0	0	0	0	0	112.837	66.1086	106.27	77.9561	90.793
Q13838	6	5	42.051	0.00439616	1;2;3	3	Spliceosome RNA helicase DDX39B OS=Homo sapiens OX=9606 GN=DDX39B PE=1 SV=1	104.789	56.7614	57.8285	52.0071	67.8466	98.0937	200.159	71.68	235.447	151.345	82.3095	70.6282	79.105	78.5287	77.6429	271.453	105.073	500.856	465.351	335.683
O75533	4	4	21.6461	8.66e-06	1;2	2	Splicing factor 3B subunit 1 OS=Homo sapiens OX=9606 GN=SF3B1 PE=1 SV=3	0	0	0	0	0	0	0	0	0	0	0	0	0	0	0	455.07	61.8607	8.12617	164.758	172.454
P26368	6	3	41.4404	0.0116706	2	1	Splicing factor U2AF 65 kDa subunit OS=Homo sapiens OX=9606 GN=U2AF2 PE=1 SV=4	0	9.56127	126.719	5.76327	35.511	35.8907	15.1354	155.297	240.299	111.655	3.08435	1.70574	4.08788	3.91377	3.19794	22.9219	376.587	115.528	180.11	173.787
P23246	6	2	41.6776	2.27e-05	2;3	2	Splicing factor, proline- and glutamine-rich OS=Homo sapiens OX=9606 GN=SFPQ PE=1 SV=2	12.0612	8.94189	8.8296	9.61888	9.86289	28.6866	9.2698	5.75386	10.573	13.5708	1.83755	0.586771	0.593176	0.254161	0.817915	24.8158	110.983	25.4351	15.5517	44.1964
Q8WXA9	15	9	92.521	0.0498333	2;3;4;5	4	Splicing regulatory glutamine/lysine-rich protein 1 OS=Homo sapiens OX=9606 GN=SREK1 PE=1 SV=1	281.234	262.033	278.085	269.107	272.615	247.596	117.227	170.122	95.0925	157.509	371.71	388.884	424.56	484.817	417.493	142.751	499.935	605.967	133.52	345.543
Q7KZF4	6	6	30.9796	0.0242302	2;5	2	Staphylococcal nuclease domain-containing protein 1 OS=Homo sapiens OX=9606 GN=SND1 PE=1 SV=1	0	174.815	324.109	253.87	188.198	59.4093	341.268	75.1065	318.537	198.58	1.33034	0	0.505051	2.88505	1.18011	17.8239	17.932	1.67168	284.449	80.4692
Q9Y365	1	1	5.1698	0.00105963	3	1	START domain-containing protein 10 OS=Homo sapiens OX=9606 GN=STARD10 PE=1 SV=2	65.4905	68.3366	67.5895	70.6641	68.0202	70.8032	16.8569	18.2101	23.6269	32.3743	148.437	113.794	112.01	154.639	132.22	38.6677	77.4238	31.3889	65.5962	53.2692
P38646	9	7	52.0761	1.65e-11	1;2;8	3	Stress-70 protein, mitochondrial OS=Homo sapiens OX=9606 GN=HSPA9 PE=1 SV=2	6.91649	16.8767	12.501	13.765	12.5148	150.837	45.356	87.8363	106.846	97.7189	0	0	0	0	0	1713.28	1016.22	785.033	883.375	1099.48
P31948	12	7	92.4943	2.45e-06	1;2;3	3	Stress-induced-phosphoprotein 1 OS=Homo sapiens OX=9606 GN=STIP1 PE=1 SV=1	38.9032	30.458	37.2484	35.7281	35.5844	61.5533	197.856	149.591	140.886	137.472	49.2611	56.2921	79.351	43.6562	57.1401	392.924	326.937	221.428	297.857	309.786
Q96I99	9	8	43.4688	0.0458532	1;2	2	Succinate--CoA ligase [GDP-forming] subunit beta, mitochondrial OS=Homo sapiens OX=9606 GN=SUCLG2 PE=1 SV=2	140.421	266.692	267.646	74.8213	187.395	343.988	333.429	260.071	446.215	345.926	137.421	179.285	170.858	168.59	164.039	270.311	179.41	774.61	1129.26	588.398
P51649	1	1	5.5704	0.0371643	1	1	Succinate-semialdehyde dehydrogenase, mitochondrial OS=Homo sapiens OX=9606 GN=ALDH5A1 PE=1 SV=2	0	0	0	0	0	0	0	0	0	0	0	0	0	0	0	47.8337	43.3764	0	0.731934	22.9855
Q9Y6N5	5	3	30.9996	0.00346434	3	1	Sulfide:quinone oxidoreductase, mitochondrial OS=Homo sapiens OX=9606 GN=SQOR PE=1 SV=1	278.065	280.202	268.281	257.021	270.892	23.8	144.031	86.424	167.768	105.506	59.676	61.7201	19.5138	17.1124	39.5056	9.28707	47.2314	46.217	58.5861	40.3304
O00445	1	1	4.0931	2.81e-09	8	1	Synaptotagmin-5 OS=Homo sapiens OX=9606 GN=SYT5 PE=1 SV=2	0	0	0	0	0	12.8286	9.07239	7.96907	4.30687	8.54424	0	0	0	0	0	7.07774	4.93464	3.46644	5.05411	5.13323
Q16650	1	1	5.0393	4.02e-05	1	1	T-box brain protein 1 OS=Homo sapiens OX=9606 GN=TBR1 PE=1 SV=1	113.631	113.355	163.483	137.725	132.048	18.8747	13.571	17.4644	0	12.4775	0	0	0	0	0	16.7896	5.14513	48.9222	17.8181	22.1688
P17987	9	6	74.1585	0.000171687	1;3	2	T-complex protein 1 subunit alpha OS=Homo sapiens OX=9606 GN=TCP1 PE=1 SV=1	178.862	180.118	180.824	180.896	180.175	28.0846	120.383	124.108	123.704	99.0699	16.6451	0.878163	8.85884	2.78662	7.29218	202.825	96.4749	307.553	40.25	161.776
P78371	9	7	61.2195	0.0118095	1;2	2	T-complex protein 1 subunit beta OS=Homo sapiens OX=9606 GN=CCT2 PE=1 SV=4	477.402	273.378	479.44	23.8545	313.519	84.581	470.061	113.863	358.059	256.641	2024.82	2298.25	2149.27	1712.45	2046.2	241.924	1249.55	350.931	225.727	517.033
P50991	8	6	58.9157	0.000107743	2;3;4	3	T-complex protein 1 subunit delta OS=Homo sapiens OX=9606 GN=CCT4 PE=1 SV=4	710.365	613.224	807.188	777.909	727.172	250.03	95.614	193.252	428.562	241.865	86.2992	90.9661	89.1952	103.128	92.3971	236.647	201.277	390.304	117.829	236.514
P48643	12	7	77.7822	0.0042635	2;3;5	3	T-complex protein 1 subunit epsilon OS=Homo sapiens OX=9606 GN=CCT5 PE=1 SV=1	183.02	189.303	196.121	192.482	190.232	28.0013	174.23	141.366	119.832	115.857	36.8185	38.5533	50.0589	73.1844	49.6538	42.5223	31.6507	40.6085	82.1301	49.2279
P49368	8	6	54.6148	0.0172263	2;3	2	T-complex protein 1 subunit gamma OS=Homo sapiens OX=9606 GN=CCT3 PE=1 SV=4	363.774	326.392	333.849	292.992	329.252	113.804	412.269	96.9318	474.236	274.31	86.8256	48.2034	39.3402	3.58337	44.4881	38.669	266.72	435.944	172.863	228.549
P50990	22	12	165.877	4.82e-05	1;2;3;4	4	T-complex protein 1 subunit theta OS=Homo sapiens OX=9606 GN=CCT8 PE=1 SV=4	847.251	792.81	789.075	770.476	799.903	476.255	329.134	500.539	452.103	439.508	366.074	242.281	297.541	307.723	303.405	348.161	244.714	486.435	321.752	350.265
P40227	2	1	19.4712	0.000478141	3	1	T-complex protein 1 subunit zeta OS=Homo sapiens OX=9606 GN=CCT6A PE=1 SV=3	127.113	144.398	141.236	137.882	137.657	124.792	79.6737	86.1658	91.0815	95.4284	48.3822	34.5619	45.2018	47.8953	44.0103	143.45	48.1697	62.235	64.0714	79.4815
P0DJG4	3	2	18.0327	2.22e-15	2	1	Testicular haploid expressed gene protein-like OS=Homo sapiens OX=9606 GN=THEGL PE=2 SV=1	0	0	0	0	0	0	0	0	0	0	682.586	787.463	771.251	722.559	740.965	0	0	0	0	0
Q8NBS9	4	3	22.3265	6.17e-08	3	1	Thioredoxin domain-containing protein 5 OS=Homo sapiens OX=9606 GN=TXNDC5 PE=1 SV=2	0	0	0	0	0	373.597	48.2682	127.362	146.335	173.891	0	0	0	0	0	54.8138	29.9706	36.8035	178.247	74.9587
P30048	8	7	67.172	2.56e-05	1;2;3	3	Thioredoxin-dependent peroxide reductase, mitochondrial OS=Homo sapiens OX=9606 GN=PRDX3 PE=1 SV=3	100.055	131.501	108.422	136.931	119.227	179.866	214.448	163.627	262.362	205.076	216.414	211.699	217.326	138.9	196.085	896.332	350.497	1165.51	625.73	759.518
P62328	1	1	16.1764	1.64e-05	3	1	Thymosin beta-4 OS=Homo sapiens OX=9606 GN=TMSB4X PE=1 SV=2	0	0	0	0	0	108.727	153.658	157.039	144.842	141.067	0	0	0	0	0	480.974	287.411	700.804	3.42286	368.153
P23193	2	1	15.5527	0.00275125	1;3	2	Transcription elongation factor A protein 1 OS=Homo sapiens OX=9606 GN=TCEA1 PE=1 SV=2	0	0	0	0	0	0	0	0	0	0	0	0	0	0	0	53.3091	32.3938	0	32.228	29.4827
O00267	3	1	14.0968	0.0269492	1	1	Transcription elongation factor SPT5 OS=Homo sapiens OX=9606 GN=SUPT5H PE=1 SV=1	0	0	0	0	0	40.9803	15.286	1.01677	0	14.3208	0	0	0	0	0	43.0609	24.6061	0	14.2781	20.4863
Q7Z6R9	1	1	4.4778	0.0104064	1	1	Transcription factor AP-2-delta OS=Homo sapiens OX=9606 GN=TFAP2D PE=2 SV=1	0	0	0	0	0	11.0144	16.5491	36.2646	0.342628	16.0427	0	0	0	0	0	0	0	0	0	0
P35712	1	1	4.1344	0.00213806	6	1	Transcription factor SOX-6 OS=Homo sapiens OX=9606 GN=SOX6 PE=1 SV=3	0	0	0	0	0	17.6167	0	16.1868	17.0978	12.7253	0	0	0	0	0	0	0	0	0	0
Q04725	1	1	5.03	0.00950982	3	1	Transducin-like enhancer protein 2 OS=Homo sapiens OX=9606 GN=TLE2 PE=1 SV=2	2.60365	4.85394	6.89143	10.137	6.12151	39.2537	29.3494	33.8558	32.9498	33.8522	0.862276	0	5.4706	3.82992	2.5407	56.5121	60.092	1.45129	50.5253	42.1452
P55072	12	8	85.2992	4.77e-15	1;2;3	3	Transitional endoplasmic reticulum ATPase OS=Homo sapiens OX=9606 GN=VCP PE=1 SV=4	0.559852	0.212465	1.3146	0.670294	0.689302	273.976	311.04	324.054	303.362	303.108	0	0	0	0	0	506.844	371.945	455.993	321.005	413.947
P29401	21	19	184.531	5.98e-11	1;2;3;4	4	Transketolase OS=Homo sapiens OX=9606 GN=TKT PE=1 SV=3	295.979	322.337	317.853	315.864	313.008	2027.64	1567.49	1382.72	1814.1	1697.99	246.396	242.568	270.107	356.21	278.82	2308.93	2794.18	2220.49	1963.76	2321.84
P51571	3	3	18.7738	0.0294404	2;3	2	Translocon-associated protein subunit delta OS=Homo sapiens OX=9606 GN=SSR4 PE=1 SV=1	0	0	0	0	0	24.645	122.527	83.3822	0	57.6387	19.7657	44.6834	53.2756	52.8275	42.6381	23.1577	59.0434	20.9224	0	25.7809
P49755	5	5	51.074	0.00291867	3;4	2	Transmembrane emp24 domain-containing protein 10 OS=Homo sapiens OX=9606 GN=TMED10 PE=1 SV=2	105.448	101.556	105.717	93.4081	101.532	217.092	335.323	437.024	288.484	319.481	80.766	75.5008	78.956	133.688	92.2278	776.567	588.908	541.504	93.2206	500.05
P40939	19	12	149.357	3.01e-06	1;2;3	3	Trifunctional enzyme subunit alpha, mitochondrial OS=Homo sapiens OX=9606 GN=HADHA PE=1 SV=2	342.389	328.107	303.523	283.117	314.284	211.666	460.691	404.305	572.331	412.248	411.862	482.463	428.88	483.984	451.797	1265.08	1406.1	1524.82	1445.37	1410.34
P55084	11	8	79.0545	0.00307875	2;3;4	3	Trifunctional enzyme subunit beta, mitochondrial OS=Homo sapiens OX=9606 GN=HADHB PE=1 SV=3	89.9946	2.13006	1.86299	5.3809	24.8421	77.6594	26.3677	34.6474	67.2357	51.4776	47.134	62.3341	57.8608	9.76455	44.2734	180.892	486.931	163.869	429.38	315.268
P60174	16	11	146.836	2.33e-09	1;2;3	3	Triosephosphate isomerase OS=Homo sapiens OX=9606 GN=TPI1 PE=1 SV=3	81.369	36.3257	33.1063	36.9788	46.9449	753.506	1170.97	970.34	1560.79	1113.9	56.0472	50.9252	34.6383	19.2803	40.2227	1641.17	3114.93	2483.51	2175.82	2353.86
I1YAP6	1	1	4.2851	0.000269479	3	1	Tripartite motif-containing protein 77 OS=Homo sapiens OX=9606 GN=TRIM77 PE=2 SV=2	76.4102	91.059	86.6327	90.501	86.1507	19.5727	3.53246	4.09665	4.07295	7.81869	0	0	0	0	0	29.9473	0	11.6924	0.147401	10.4468
Q08J23	6	4	32.2877	0.0458831	1;4	2	tRNA (cytosine(34)-C(5))-methyltransferase OS=Homo sapiens OX=9606 GN=NSUN2 PE=1 SV=2	86.7403	84.5916	101.471	100.954	93.4392	178.266	124.819	109.526	72.1347	121.186	242.017	218.107	227.028	263.363	237.629	92.2549	247.643	36.5162	21.1194	99.3835
P06753	4	1	45.6574	7.46e-05	3	1	Tropomyosin alpha-3 chain OS=Homo sapiens OX=9606 GN=TPM3 PE=1 SV=2	246.825	239.354	251.562	255.451	248.298	54.6296	17.7132	17.7638	18.1359	27.0606	0	0	0	0	0	40.6476	0	25.3933	0.231004	16.568
P67936	2	1	19.3385	1.38e-07	3;4	2	Tropomyosin alpha-4 chain OS=Homo sapiens OX=9606 GN=TPM4 PE=1 SV=3	101.102	112.59	116.441	149.734	119.967	0	0	0	0	0	46.9553	55.0715	34.3429	22.8419	39.8029	0	0	0	0	0
P23381	6	5	33.6892	0.00916118	1;2;3	3	Tryptophan--tRNA ligase, cytoplasmic OS=Homo sapiens OX=9606 GN=WARS PE=1 SV=2	50.3773	44.7722	40.0338	43.0905	44.5684	113.172	71.3281	85.8684	168.314	109.671	27.3973	24.6281	25.212	32.3704	27.402	218.306	31.6724	442.769	104.5	199.312
Q9BQE3;Q9NY65	18	2	180.906	0.000423388	1;2;3;4;5;8	6	Tubulin alpha-1C chain OS=Homo sapiens OX=9606 GN=TUBA1C PE=1 SV=1	3.10029	1.46306	2.94953	4.69158	3.05112	1.58057	19.0702	17.6444	16.3128	13.652	0	0	0	0	0	55.2145	35.1571	3.1784	19.7929	28.3357
P07437;A6NNZ2;Q13509	27	3	240.767	0.00677144	1;2;3;4;5;6;7;8	8	Tubulin beta chain OS=Homo sapiens OX=9606 GN=TUBB PE=1 SV=2	3.91506	4.70459	4.14329	5.45044	4.55335	16.0326	9.43884	52.4365	102.883	45.1976	43.8598	49.2122	45.7194	49.3655	47.0393	107.76	15.0646	8.60554	13.6546	36.2712
Q9BVA1;Q13885;Q9BUF5	26	2	227.85	0.00448654	1;2;3;4;5;6;7;8	8	Tubulin beta-2B chain OS=Homo sapiens OX=9606 GN=TUBB2B PE=1 SV=1	0	0	0	0	0	7.88527	9.89579	9.32319	7.71722	8.70537	2.17056	0	3.01844	0.962405	1.53785	3.23457	3.93874	184.916	3.74048	48.9574
P68371;P04350;Q3ZCM7	26	3	247.462	0.000252792	1;2;3;4;5;6;7;8	8	Tubulin beta-4B chain OS=Homo sapiens OX=9606 GN=TUBB4B PE=1 SV=1	10.068	24.3946	23.3871	8.06461	16.4786	5.94015	4.30157	27.5908	11.6657	12.3745	0	0	0	0	0	674.844	287.33	313.35	106.612	345.534
P41273	2	2	19.9536	0.0296379	6	1	Tumor necrosis factor ligand superfamily member 9 OS=Homo sapiens OX=9606 GN=TNFSF9 PE=1 SV=1	0	0	0	0	0	210.299	0	381.081	473.339	266.18	0	0	0	0	0	0	0	0	0	0
P09758	1	1	10.72	0.002157	6	1	Tumor-associated calcium signal transducer 2 OS=Homo sapiens OX=9606 GN=TACSTD2 PE=1 SV=3	0	0	0	0	0	65.0347	0	53.284	53.4057	42.9311	0	0	0	0	0	0	0	0	0	0
Q12792	5	5	29.8369	1.91e-05	1;4	2	Twinfilin-1 OS=Homo sapiens OX=9606 GN=TWF1 PE=1 SV=3	645.86	625.133	654.473	590.86	629.081	223.832	165.628	376.76	50.073	204.073	1467.18	1572.14	1489.76	1526.92	1514	23.2237	124.627	94.3857	55.347	74.3957
Q86T03	1	1	4.7179	0.00242447	2	1	Type 1 phosphatidylinositol 4,5-bisphosphate 4-phosphatase OS=Homo sapiens OX=9606 GN=PIP4P1 PE=1 SV=1	0	0	0	0	0	0	0	0	0	0	0	0	0	0	0	2.75466	60.1423	17.6336	27.2953	26.9565
Q96RU2	3	3	20.7591	1.2e-07	7	1	Ubiquitin carboxyl-terminal hydrolase 28 OS=Homo sapiens OX=9606 GN=USP28 PE=1 SV=1	0	0	0	0	0	117.177	90.0096	84.8297	74.4667	91.6207	1.40952	0.675344	11.487	0.365066	3.48424	138.841	126.305	114.402	140.477	130.007
P62068	2	1	14.4576	0.00641306	2	1	Ubiquitin carboxyl-terminal hydrolase 46 OS=Homo sapiens OX=9606 GN=USP46 PE=1 SV=1	0	0	0	0	0	0	0	0	0	0	50.9328	46.2594	24.6769	33.397	38.8165	99.2163	5.87239	0	9.50959	28.6496
P45974	2	2	9.3467	0.000513117	1;2	2	Ubiquitin carboxyl-terminal hydrolase 5 OS=Homo sapiens OX=9606 GN=USP5 PE=1 SV=2	0	34.3077	13.6854	28.2924	19.0714	0	0	0	0	0	0	0	0	0	0	105.675	58.6687	79.8859	60.9398	76.2923
P62979	6	1	69.9922	0.0139542	1;2;3	3	Ubiquitin-40S ribosomal protein S27a OS=Homo sapiens OX=9606 GN=RPS27A PE=1 SV=2	146.873	140.426	130.219	140.52	139.51	49.89	108.756	86.9885	95.5923	85.3067	213.116	154.287	135.92	142.207	161.383	67.0595	105.878	146.77	105.881	106.397
P22314	13	10	95.47	1.33e-05	1;2;3	3	Ubiquitin-like modifier-activating enzyme 1 OS=Homo sapiens OX=9606 GN=UBA1 PE=1 SV=3	183.66	101.915	219.339	129.214	158.532	164.084	545.728	227.03	588.932	381.444	11.8781	48.8661	22.5184	32.5374	28.95	306.761	343.728	392.05	419.555	365.523
O60701	1	1	10.5396	0.00199137	3	1	UDP-glucose 6-dehydrogenase OS=Homo sapiens OX=9606 GN=UGDH PE=1 SV=1	43.6003	32.9854	35.4449	36.6392	37.1675	97.7549	46.8228	42.9005	47.1921	58.6676	78.7963	52.0343	61.8579	73.9694	66.6645	10.2987	25.7067	4.53333	26.0682	16.6517
Q8IYS4	2	2	13.8402	2.07e-06	7	1	Uncharacterized protein C16orf71 OS=Homo sapiens OX=9606 GN=C16orf71 PE=2 SV=3	0	0	0	0	0	50.3007	58.5193	61.5753	67.9697	59.5912	0	0	0	0	0	46.7709	43.6654	53.7751	52.233	49.1111
Q16851	2	1	9.7091	0.00057613	3	1	UTP--glucose-1-phosphate uridylyltransferase OS=Homo sapiens OX=9606 GN=UGP2 PE=1 SV=5	15.4553	21.5584	23.3218	20.9732	20.3272	11.1665	8.92731	7.22473	7.58056	8.72477	3.64206	1.71236	3.2445	1.63829	2.5593	8.4529	2.01873	3.09712	14.3645	6.98332
P50552	3	3	14.1732	9.49e-09	1	1	Vasodilator-stimulated phosphoprotein OS=Homo sapiens OX=9606 GN=VASP PE=1 SV=3	0	0	0	0	0	52.7879	67.1133	53.6254	56.3361	57.4657	0	0	0	0	0	0	0	0	0	0
O14975	1	1	4.2292	1.6e-11	8	1	Very long-chain acyl-CoA synthetase OS=Homo sapiens OX=9606 GN=SLC27A2 PE=1 SV=2	0	0	0	0	0	0	0	0	0	0	0	0	0	0	0	10.1282	5.62389	10.8994	11.2084	9.46499
P49748	8	5	48.3136	0.00113576	1;2;3	3	Very long-chain specific acyl-CoA dehydrogenase, mitochondrial OS=Homo sapiens OX=9606 GN=ACADVL PE=1 SV=1	6.3801	6.4183	3.87395	4.26124	5.2334	108.363	5.50721	61.2574	11.0646	46.5479	188.576	95.409	66.5125	143.267	123.441	291.604	206.586	25.1002	324.193	211.871
O75396	2	2	11.9522	0.0397537	2	1	Vesicle-trafficking protein SEC22b OS=Homo sapiens OX=9606 GN=SEC22B PE=1 SV=4	0	0	0	0	0	0	39.6284	18.7665	3.12779	15.3807	2.22398	0	0	0	0.555996	0	7.25079	76.469	107.945	47.9161
Q12907	2	2	11.1649	6.46e-05	2	1	Vesicular integral-membrane protein VIP36 OS=Homo sapiens OX=9606 GN=LMAN2 PE=1 SV=1	0	0	0	0	0	28.9744	49.6245	27.0994	1.5881	26.8216	0	0	0	0	0	11.8442	7.61781	45.7795	69.2809	33.6306
P21796	5	5	57.9181	2.85e-08	2;3	2	Voltage-dependent anion-selective channel protein 1 OS=Homo sapiens OX=9606 GN=VDAC1 PE=1 SV=2	55.3024	48.6962	47.0805	43.12	48.5498	133.158	310.036	248.188	529.994	305.344	16.275	18.6226	20.9039	13.7506	17.388	589.432	788.92	1923.03	1257.37	1139.69
P45880	4	3	42.1459	0.000140871	2;3	2	Voltage-dependent anion-selective channel protein 2 OS=Homo sapiens OX=9606 GN=VDAC2 PE=1 SV=2	140.693	136.216	129.411	116.134	130.613	100.018	205.539	210.86	227.478	185.974	160.316	133.721	145.939	157.149	149.281	907.286	374.279	1368.99	424.099	768.664
P15313	1	1	4.5199	8.19e-09	2	1	V-type proton ATPase subunit B, kidney isoform OS=Homo sapiens OX=9606 GN=ATP6V1B1 PE=1 SV=3	0	0	0	0	0	0	0	0	0	0	27.4711	65.5967	58.381	62.8312	53.57	0	0	0	0	0
O75083	5	5	34.8042	0.00159901	2	1	WD repeat-containing protein 1 OS=Homo sapiens OX=9606 GN=WDR1 PE=1 SV=4	0	0	0	0	0	25.0638	55.6983	101.076	334.877	129.179	0	0	0	0	0	27.7136	325.012	58.1095	145.489	139.081
P13010	10	9	66.3953	0.0150246	1;2;3	3	X-ray repair cross-complementing protein 5 OS=Homo sapiens OX=9606 GN=XRCC5 PE=1 SV=3	6.06172	106.194	467.827	164.684	186.192	34.6591	334.191	20.9335	415.251	201.259	11.6949	5.89607	7.36217	15.2524	10.0514	596.565	317.551	324.076	130.04	342.058
P16989	1	1	5.0827	0.00575738	1	1	Y-box-binding protein 3 OS=Homo sapiens OX=9606 GN=YBX3 PE=1 SV=4	167.096	222.34	360.8	337.344	271.895	165.817	148.732	0	157.054	117.901	0	0	0	0	0	32.9033	158.06	0	158.77	87.4333
A6NP61	1	1	4.5011	0.0023558	4	1	ZAR1-like protein OS=Homo sapiens OX=9606 GN=ZAR1L PE=2 SV=2	129.185	121.866	121.908	108.731	120.422	49.4571	38.2808	62.9952	122.071	68.2011	23.4174	22.58	22.9285	32.3319	25.3145	39.1832	11.1299	3.60032	35.704	22.4044
Q8NAP3	1	1	4.2427	3.96e-08	8	1	Zinc finger and BTB domain-containing protein 38 OS=Homo sapiens OX=9606 GN=ZBTB38 PE=1 SV=2	0	0	0	0	0	0.608202	2.57136	2.0296	1.82935	1.75963	0	0	0	0	0	6.8821	4.8653	4.46618	7.10086	5.82861
P17022	2	2	8.8457	0.000339985	4	1	Zinc finger protein 18 OS=Homo sapiens OX=9606 GN=ZNF18 PE=1 SV=2	26.8085	25.2179	26.6332	25.0528	25.9281	22.7581	6.71142	35.07	12.2266	19.1915	100.974	106.948	114.054	124.684	111.665	1.02103	12.9146	8.21976	10.4127	8.14201
Q15942	2	2	10.391	5.48e-11	3	1	Zyxin OS=Homo sapiens OX=9606 GN=ZYX PE=1 SV=1	49.0513	50.4594	58.0607	50.1802	51.9379	96.3613	56.5526	43.5514	39.8853	59.0877	0	0	0	0	0	16.5691	7.16425	9.24523	15.158	12.0342

## Sheet: 2 - HCC1954 ME
	SUPLEMENTARY TABLE 2B - HCC-1954 ME FRACTION PROTEIN MEDIUM ABUNDANCE
Accession	Description	HCC1954 ME Medium
O43707	Alpha-actinin-4 OS=Homo sapiens OX=9606 GN=ACTN4 PE=1 SV=2	34395.4
P35579;P14105;Q62812	Myosin-9 OS=Homo sapiens OX=9606 GN=MYH9 PE=1 SV=4	22379.5
P17980	26S proteasome regulatory subunit 6A OS=Homo sapiens OX=9606 GN=PSMC3 PE=1 SV=3	16691.6
Q9P2J5	Leucine--tRNA ligase, cytoplasmic OS=Homo sapiens OX=9606 GN=LARS PE=1 SV=2	16036.4
P21333	Filamin-A OS=Homo sapiens OX=9606 GN=FLNA PE=1 SV=4	13524.6
P63261;O18499;O18500;O42161;P02570;P02571;P02572;P04829;P07837;P10983;P10984;P10986;P10987;P12714;P14227;P15475;P17304;P18600;P18601;P18603;P29751;P30162;P30163;P41340;P48975;P49128;P53456;P53471;P53478;P53484;P53485;P53486;P53505;P53506;P60709;P90689;Q00214;Q00215;Q03342;Q25010;Q25472;Q27250;Q92193;Q93129	Actin, cytoplasmic 2 OS=Homo sapiens OX=9606 GN=ACTG1 PE=1 SV=1	9713.3
P23141;Q9UKY3	Liver carboxylesterase 1 OS=Homo sapiens OX=9606 GN=CES1 PE=1 SV=2	9110.65
P06733;O02654;P07322;P07323;P08734;P09104;P13929;P17182;P17183;P19140;P21550;P25704;P42897;P51913;Q27727;Q27877;Q9PVK2;Q9W7L0;Q9W7L1;Q9W7L2	Alpha-enolase OS=Homo sapiens OX=9606 GN=ENO1 PE=1 SV=2	7464.59
Q5T089	MORN repeat-containing protein 1 OS=Homo sapiens OX=9606 GN=MORN1 PE=2 SV=2	6552.42
O43175	D-3-phosphoglycerate dehydrogenase OS=Homo sapiens OX=9606 GN=PHGDH PE=1 SV=4	5218.56
Q49A26	Putative oxidoreductase GLYR1 OS=Homo sapiens OX=9606 GN=GLYR1 PE=1 SV=4	3561.95
P19338	Nucleolin OS=Homo sapiens OX=9606 GN=NCL PE=1 SV=3	2987.13
P05787	Keratin, type II cytoskeletal 8 OS=Homo sapiens OX=9606 GN=KRT8 PE=1 SV=7	2458.1
P49327	Fatty acid synthase OS=Homo sapiens OX=9606 GN=FASN PE=1 SV=3	2390.45
P04626	Receptor tyrosine-protein kinase erbB-2 OS=Homo sapiens OX=9606 GN=ERBB2 PE=1 SV=1	2142.96
P10809;P18687;P19226	60 kDa heat shock protein, mitochondrial OS=Homo sapiens OX=9606 GN=HSPD1 PE=1 SV=2	1760.03
P14618;O18919;P11974;P11979;P11980;P11981;P14786;P52480	Pyruvate kinase PKM OS=Homo sapiens OX=9606 GN=PKM PE=1 SV=4	1490.5
P60660	Myosin light polypeptide 6 OS=Homo sapiens OX=9606 GN=MYL6 PE=1 SV=2	1489.83
P12814	Alpha-actinin-1 OS=Homo sapiens OX=9606 GN=ACTN1 PE=1 SV=2	1454.42
P35221;P26231	Catenin alpha-1 OS=Homo sapiens OX=9606 GN=CTNNA1 PE=1 SV=1	1308.69
P40926	Malate dehydrogenase, mitochondrial OS=Homo sapiens OX=9606 GN=MDH2 PE=1 SV=3	1260.85
P05783;P05784	Keratin, type I cytoskeletal 18 OS=Homo sapiens OX=9606 GN=KRT18 PE=1 SV=2	1240.9
Q9BPY3	Protein FAM118B OS=Homo sapiens OX=9606 GN=FAM118B PE=1 SV=1	1134.23
P13639;P05086;P05197;P09445;P58252;Q90705	Elongation factor 2 OS=Homo sapiens OX=9606 GN=EEF2 PE=1 SV=4	1101.12
O60716	Catenin delta-1 OS=Homo sapiens OX=9606 GN=CTNND1 PE=1 SV=1	1088.97
P04406;O57672;P04797;P08735;P10096;P16858;P17244;P46406;P51640;Q28554	Glyceraldehyde-3-phosphate dehydrogenase OS=Homo sapiens OX=9606 GN=GAPDH PE=1 SV=3	1078.47
O75367	Core histone macro-H2A.1 OS=Homo sapiens OX=9606 GN=H2AFY PE=1 SV=4	933.163
Q09666	Neuroblast differentiation-associated protein AHNAK OS=Homo sapiens OX=9606 GN=AHNAK PE=1 SV=2	905.52
P08729	Keratin, type II cytoskeletal 7 OS=Homo sapiens OX=9606 GN=KRT7 PE=1 SV=5	886.973
P47895	Aldehyde dehydrogenase family 1 member A3 OS=Homo sapiens OX=9606 GN=ALDH1A3 PE=1 SV=2	867.1
P62805;P02304;P02306;P02307;P02308;P02310;P02311;P04915;P08436;P35057;P35059;P40287;P50566;Q27443	Histone H4 OS=Homo sapiens OX=9606 GN=HIST1H4A PE=1 SV=2	853.55
P30153	Serine/threonine-protein phosphatase 2A 65 kDa regulatory subunit A alpha isoform OS=Homo sapiens OX=9606 GN=PPP2R1A PE=1 SV=4	820.871
P09382	Galectin-1 OS=Homo sapiens OX=9606 GN=LGALS1 PE=1 SV=2	802.997
P50990	T-complex protein 1 subunit theta OS=Homo sapiens OX=9606 GN=CCT8 PE=1 SV=4	799.903
P41091;Q2VIR3	Eukaryotic translation initiation factor 2 subunit 3 OS=Homo sapiens OX=9606 GN=EIF2S3 PE=1 SV=3	794.833
P09651;Q32P51	Heterogeneous nuclear ribonucleoprotein A1 OS=Homo sapiens OX=9606 GN=HNRNPA1 PE=1 SV=5	763.053
P11021	Endoplasmic reticulum chaperone BiP OS=Homo sapiens OX=9606 GN=HSPA5 PE=1 SV=2	743.769
Q00839	Heterogeneous nuclear ribonucleoprotein U OS=Homo sapiens OX=9606 GN=HNRNPU PE=1 SV=6	736.367
P50991	T-complex protein 1 subunit delta OS=Homo sapiens OX=9606 GN=CCT4 PE=1 SV=4	727.172
P32969	60S ribosomal protein L9 OS=Homo sapiens OX=9606 GN=RPL9 PE=1 SV=1	713.936
Q71UI9;P0C0S5	Histone H2A.V OS=Homo sapiens OX=9606 GN=H2AFV PE=1 SV=3	681.292
P27816	Microtubule-associated protein 4 OS=Homo sapiens OX=9606 GN=MAP4 PE=1 SV=3	662.147
P12830	Cadherin-1 OS=Homo sapiens OX=9606 GN=CDH1 PE=1 SV=3	649.661
P23528	Cofilin-1 OS=Homo sapiens OX=9606 GN=CFL1 PE=1 SV=3	642.168
Q12792	Twinfilin-1 OS=Homo sapiens OX=9606 GN=TWF1 PE=1 SV=3	629.081
P06702	Protein S100-A9 OS=Homo sapiens OX=9606 GN=S100A9 PE=1 SV=1	600.354
P09972	Fructose-bisphosphate aldolase C OS=Homo sapiens OX=9606 GN=ALDOC PE=1 SV=2	593.347
P00338;Q9BE24	L-lactate dehydrogenase A chain OS=Homo sapiens OX=9606 GN=LDHA PE=1 SV=2	591.155
P51858	Hepatoma-derived growth factor OS=Homo sapiens OX=9606 GN=HDGF PE=1 SV=1	586.368
P05109	Protein S100-A8 OS=Homo sapiens OX=9606 GN=S100A8 PE=1 SV=1	585.487
P11142;P08108;P08109;P11503;P19120;P19378;P27541;Q06248;Q90473	Heat shock cognate 71 kDa protein OS=Homo sapiens OX=9606 GN=HSPA8 PE=1 SV=1	553.206
Q14697	Neutral alpha-glucosidase AB OS=Homo sapiens OX=9606 GN=GANAB PE=1 SV=3	530.914
Q14315	Filamin-C OS=Homo sapiens OX=9606 GN=FLNC PE=1 SV=3	526.862
O75369	Filamin-B OS=Homo sapiens OX=9606 GN=FLNB PE=1 SV=2	504.69
P09429;B2RPK0	High mobility group protein B1 OS=Homo sapiens OX=9606 GN=HMGB1 PE=1 SV=3	484.441
P00558	Phosphoglycerate kinase 1 OS=Homo sapiens OX=9606 GN=PGK1 PE=1 SV=3	481.606
P08238;Q58FF7	Heat shock protein HSP 90-beta OS=Homo sapiens OX=9606 GN=HSP90AB1 PE=1 SV=4	471.949
P27348	14-3-3 protein theta OS=Homo sapiens OX=9606 GN=YWHAQ PE=1 SV=1	460.515
P06576	ATP synthase subunit beta, mitochondrial OS=Homo sapiens OX=9606 GN=ATP5F1B PE=1 SV=3	451.324
P30101	Protein disulfide-isomerase A3 OS=Homo sapiens OX=9606 GN=PDIA3 PE=1 SV=4	428.033
P16615	Sarcoplasmic/endoplasmic reticulum calcium ATPase 2 OS=Homo sapiens OX=9606 GN=ATP2A2 PE=1 SV=1	426.853
P08195	4F2 cell-surface antigen heavy chain OS=Homo sapiens OX=9606 GN=SLC3A2 PE=1 SV=3	415.504
P63104	14-3-3 protein zeta/delta OS=Homo sapiens OX=9606 GN=YWHAZ PE=1 SV=1	404.916
Q00610	Clathrin heavy chain 1 OS=Homo sapiens OX=9606 GN=CLTC PE=1 SV=5	400.787
P29692	Elongation factor 1-delta OS=Homo sapiens OX=9606 GN=EEF1D PE=1 SV=5	379.092
P52272	Heterogeneous nuclear ribonucleoprotein M OS=Homo sapiens OX=9606 GN=HNRNPM PE=1 SV=3	371.117
P19012	Keratin, type I cytoskeletal 15 OS=Homo sapiens OX=9606 GN=KRT15 PE=1 SV=3	362.823
P23526	Adenosylhomocysteinase OS=Homo sapiens OX=9606 GN=AHCY PE=1 SV=4	361.327
P05556	Integrin beta-1 OS=Homo sapiens OX=9606 GN=ITGB1 PE=1 SV=2	355.442
P07900;Q14568;Q58FF6;Q58FG1	Heat shock protein HSP 90-alpha OS=Homo sapiens OX=9606 GN=HSP90AA1 PE=1 SV=5	348.014
P80404	4-aminobutyrate aminotransferase, mitochondrial OS=Homo sapiens OX=9606 GN=ABAT PE=1 SV=3	337.651
P51608	Methyl-CpG-binding protein 2 OS=Homo sapiens OX=9606 GN=MECP2 PE=1 SV=1	330.255
P49368	T-complex protein 1 subunit gamma OS=Homo sapiens OX=9606 GN=CCT3 PE=1 SV=4	329.252
P07237	Protein disulfide-isomerase OS=Homo sapiens OX=9606 GN=P4HB PE=1 SV=3	329.219
P11413	Glucose-6-phosphate 1-dehydrogenase OS=Homo sapiens OX=9606 GN=G6PD PE=1 SV=4	315.044
P40939	Trifunctional enzyme subunit alpha, mitochondrial OS=Homo sapiens OX=9606 GN=HADHA PE=1 SV=2	314.284
P78371	T-complex protein 1 subunit beta OS=Homo sapiens OX=9606 GN=CCT2 PE=1 SV=4	313.519
P29401	Transketolase OS=Homo sapiens OX=9606 GN=TKT PE=1 SV=3	313.008
P51991	Heterogeneous nuclear ribonucleoprotein A3 OS=Homo sapiens OX=9606 GN=HNRNPA3 PE=1 SV=2	310.314
P01042	Kininogen-1 OS=Homo sapiens OX=9606 GN=KNG1 PE=1 SV=2	304.062
Q9HBI6	Cytochrome P450 4F11 OS=Homo sapiens OX=9606 GN=CYP4F11 PE=1 SV=3	278.847
Q8WXA9	Splicing regulatory glutamine/lysine-rich protein 1 OS=Homo sapiens OX=9606 GN=SREK1 PE=1 SV=1	272.615
P16989	Y-box-binding protein 3 OS=Homo sapiens OX=9606 GN=YBX3 PE=1 SV=4	271.895
Q9Y6N5	Sulfide:quinone oxidoreductase, mitochondrial OS=Homo sapiens OX=9606 GN=SQOR PE=1 SV=1	270.892
P60866	40S ribosomal protein S20 OS=Homo sapiens OX=9606 GN=RPS20 PE=1 SV=1	260.885
P25705;P19483	ATP synthase subunit alpha, mitochondrial OS=Homo sapiens OX=9606 GN=ATP5F1A PE=1 SV=1	255.58
P06753	Tropomyosin alpha-3 chain OS=Homo sapiens OX=9606 GN=TPM3 PE=1 SV=2	248.298
P14625	Endoplasmin OS=Homo sapiens OX=9606 GN=HSP90B1 PE=1 SV=1	238.303
P48735	Isocitrate dehydrogenase [NADP], mitochondrial OS=Homo sapiens OX=9606 GN=IDH2 PE=1 SV=2	238.008
Q8IYT3	Coiled-coil domain-containing protein 170 OS=Homo sapiens OX=9606 GN=CCDC170 PE=1 SV=3	223.904
P04792	Heat shock protein beta-1 OS=Homo sapiens OX=9606 GN=HSPB1 PE=1 SV=2	221.619
P16403;P10412;P16402	Histone H1.2 OS=Homo sapiens OX=9606 GN=HIST1H1C PE=1 SV=2	220.386
P0DP25;P0DP23;P0DP24	Calmodulin-3 OS=Homo sapiens OX=9606 GN=CALM3 PE=1 SV=1	219.05
P42677	40S ribosomal protein S27 OS=Homo sapiens OX=9606 GN=RPS27 PE=1 SV=3	213.07
Q5QNW6;O60814;P02278;P02279;P02282;P06900;P10853;P10854;P14001;P35067;P57053;P58876;P62807;Q00715;Q93078;Q93079;Q93080;Q99877;Q99879;Q99880	Histone H2B type 2-F OS=Homo sapiens OX=9606 GN=HIST2H2BF PE=1 SV=3	205.654
Q5M9Q1	NKAP-like protein OS=Homo sapiens OX=9606 GN=NKAPL PE=2 SV=3	203.66
P16070	CD44 antigen OS=Homo sapiens OX=9606 GN=CD44 PE=1 SV=3	191.042
Q92928	Putative Ras-related protein Rab-1C OS=Homo sapiens OX=9606 GN=RAB1C PE=5 SV=2	190.647
P48643	T-complex protein 1 subunit epsilon OS=Homo sapiens OX=9606 GN=CCT5 PE=1 SV=1	190.232
P39019	40S ribosomal protein S19 OS=Homo sapiens OX=9606 GN=RPS19 PE=1 SV=2	189.795
P15531	Nucleoside diphosphate kinase A OS=Homo sapiens OX=9606 GN=NME1 PE=1 SV=1	189.289
Q7KZF4	Staphylococcal nuclease domain-containing protein 1 OS=Homo sapiens OX=9606 GN=SND1 PE=1 SV=1	188.198
Q96I99	Succinate--CoA ligase [GDP-forming] subunit beta, mitochondrial OS=Homo sapiens OX=9606 GN=SUCLG2 PE=1 SV=2	187.395
P13010	X-ray repair cross-complementing protein 5 OS=Homo sapiens OX=9606 GN=XRCC5 PE=1 SV=3	186.192
P17987	T-complex protein 1 subunit alpha OS=Homo sapiens OX=9606 GN=TCP1 PE=1 SV=1	180.175
Q58FG0	Putative heat shock protein HSP 90-alpha A5 OS=Homo sapiens OX=9606 GN=HSP90AA5P PE=2 SV=1	176.215
P52209	6-phosphogluconate dehydrogenase, decarboxylating OS=Homo sapiens OX=9606 GN=PGD PE=1 SV=3	172.998
P39023;Q92901	60S ribosomal protein L3 OS=Homo sapiens OX=9606 GN=RPL3 PE=1 SV=2	171.025
P61978	Heterogeneous nuclear ribonucleoprotein K OS=Homo sapiens OX=9606 GN=HNRNPK PE=1 SV=1	170.096
P62258	14-3-3 protein epsilon OS=Homo sapiens OX=9606 GN=YWHAE PE=1 SV=1	163.107
P52907	F-actin-capping protein subunit alpha-1 OS=Homo sapiens OX=9606 GN=CAPZA1 PE=1 SV=3	161.756
Q9NZM1	Myoferlin OS=Homo sapiens OX=9606 GN=MYOF PE=1 SV=1	161.336
P43490	Nicotinamide phosphoribosyltransferase OS=Homo sapiens OX=9606 GN=NAMPT PE=1 SV=1	160.072
P22314	Ubiquitin-like modifier-activating enzyme 1 OS=Homo sapiens OX=9606 GN=UBA1 PE=1 SV=3	158.532
P26641	Elongation factor 1-gamma OS=Homo sapiens OX=9606 GN=EEF1G PE=1 SV=3	157.814
Q9H845	Acyl-CoA dehydrogenase family member 9, mitochondrial OS=Homo sapiens OX=9606 GN=ACAD9 PE=1 SV=1	149.452
Q9P0M6	Core histone macro-H2A.2 OS=Homo sapiens OX=9606 GN=H2AFY2 PE=1 SV=3	144.867
P62979	Ubiquitin-40S ribosomal protein S27a OS=Homo sapiens OX=9606 GN=RPS27A PE=1 SV=2	139.51
P40227	T-complex protein 1 subunit zeta OS=Homo sapiens OX=9606 GN=CCT6A PE=1 SV=3	137.657
P46778	60S ribosomal protein L21 OS=Homo sapiens OX=9606 GN=RPL21 PE=1 SV=2	136.652
Q96I24	Far upstream element-binding protein 3 OS=Homo sapiens OX=9606 GN=FUBP3 PE=1 SV=2	135.394
P21980	Protein-glutamine gamma-glutamyltransferase 2 OS=Homo sapiens OX=9606 GN=TGM2 PE=1 SV=2	134.338
P26583	High mobility group protein B2 OS=Homo sapiens OX=9606 GN=HMGB2 PE=1 SV=2	132.863
Q16650	T-box brain protein 1 OS=Homo sapiens OX=9606 GN=TBR1 PE=1 SV=1	132.048
P45880	Voltage-dependent anion-selective channel protein 2 OS=Homo sapiens OX=9606 GN=VDAC2 PE=1 SV=2	130.613
P07814	Bifunctional glutamate/proline--tRNA ligase OS=Homo sapiens OX=9606 GN=EPRS PE=1 SV=5	130.335
Q08211	ATP-dependent RNA helicase A OS=Homo sapiens OX=9606 GN=DHX9 PE=1 SV=4	124.096
A6NP61	ZAR1-like protein OS=Homo sapiens OX=9606 GN=ZAR1L PE=2 SV=2	120.422
P61769	Beta-2-microglobulin OS=Homo sapiens OX=9606 GN=B2M PE=1 SV=1	120.236
P67936	Tropomyosin alpha-4 chain OS=Homo sapiens OX=9606 GN=TPM4 PE=1 SV=3	119.967
P30048	Thioredoxin-dependent peroxide reductase, mitochondrial OS=Homo sapiens OX=9606 GN=PRDX3 PE=1 SV=3	119.227
P15170	Eukaryotic peptide chain release factor GTP-binding subunit ERF3A OS=Homo sapiens OX=9606 GN=GSPT1 PE=1 SV=1	117.808
Q16822	Phosphoenolpyruvate carboxykinase [GTP], mitochondrial OS=Homo sapiens OX=9606 GN=PCK2 PE=1 SV=4	116.685
P60842	Eukaryotic initiation factor 4A-I OS=Homo sapiens OX=9606 GN=EIF4A1 PE=1 SV=1	115.483
P35268;Q6P5R6	60S ribosomal protein L22 OS=Homo sapiens OX=9606 GN=RPL22 PE=1 SV=2	112.03
P05141	ADP/ATP translocase 2 OS=Homo sapiens OX=9606 GN=SLC25A5 PE=1 SV=7	111.347
P49411	Elongation factor Tu, mitochondrial OS=Homo sapiens OX=9606 GN=TUFM PE=1 SV=2	102.466
P49755	Transmembrane emp24 domain-containing protein 10 OS=Homo sapiens OX=9606 GN=TMED10 PE=1 SV=2	101.532
A5A3E0	POTE ankyrin domain family member F OS=Homo sapiens OX=9606 GN=POTEF PE=1 SV=2	93.5611
Q13740	CD166 antigen OS=Homo sapiens OX=9606 GN=ALCAM PE=1 SV=2	93.4904
Q08J23	tRNA (cytosine(34)-C(5))-methyltransferase OS=Homo sapiens OX=9606 GN=NSUN2 PE=1 SV=2	93.4392
O43278	Kunitz-type protease inhibitor 1 OS=Homo sapiens OX=9606 GN=SPINT1 PE=1 SV=2	91.7424
P35580	Myosin-10 OS=Homo sapiens OX=9606 GN=MYH10 PE=1 SV=3	89.3639
P50897	Palmitoyl-protein thioesterase 1 OS=Homo sapiens OX=9606 GN=PPT1 PE=1 SV=1	86.6579
I1YAP6	Tripartite motif-containing protein 77 OS=Homo sapiens OX=9606 GN=TRIM77 PE=2 SV=2	86.1507
Q1KMD3	Heterogeneous nuclear ribonucleoprotein U-like protein 2 OS=Homo sapiens OX=9606 GN=HNRNPUL2 PE=1 SV=1	85.8575
P07339	Cathepsin D OS=Homo sapiens OX=9606 GN=CTSD PE=1 SV=1	85.7066
P26038	Moesin OS=Homo sapiens OX=9606 GN=MSN PE=1 SV=3	85.5291
P12236	ADP/ATP translocase 3 OS=Homo sapiens OX=9606 GN=SLC25A6 PE=1 SV=4	82.6984
P30084	Enoyl-CoA hydratase, mitochondrial OS=Homo sapiens OX=9606 GN=ECHS1 PE=1 SV=4	81.975
Q9UL46	Proteasome activator complex subunit 2 OS=Homo sapiens OX=9606 GN=PSME2 PE=1 SV=4	81.9129
P31947	14-3-3 protein sigma OS=Homo sapiens OX=9606 GN=SFN PE=1 SV=1	80.8672
Q92769	Histone deacetylase 2 OS=Homo sapiens OX=9606 GN=HDAC2 PE=1 SV=2	75.7872
P14314	Glucosidase 2 subunit beta OS=Homo sapiens OX=9606 GN=PRKCSH PE=1 SV=2	74.8741
Q96RQ3	Methylcrotonoyl-CoA carboxylase subunit alpha, mitochondrial OS=Homo sapiens OX=9606 GN=MCCC1 PE=1 SV=3	74.0829
Q9Y365	START domain-containing protein 10 OS=Homo sapiens OX=9606 GN=STARD10 PE=1 SV=2	68.0202
Q13838	Spliceosome RNA helicase DDX39B OS=Homo sapiens OX=9606 GN=DDX39B PE=1 SV=1	67.8466
P27695	DNA-(apurinic or apyrimidinic site) lyase OS=Homo sapiens OX=9606 GN=APEX1 PE=1 SV=2	66.7177
P23588	Eukaryotic translation initiation factor 4B OS=Homo sapiens OX=9606 GN=EIF4B PE=1 SV=2	65.3703
Q9P258	Protein RCC2 OS=Homo sapiens OX=9606 GN=RCC2 PE=1 SV=2	64.2511
P62937	Peptidyl-prolyl cis-trans isomerase A OS=Homo sapiens OX=9606 GN=PPIA PE=1 SV=2	63.8603
P31949;O60417;P24480;P50543;Q9UDP3	Protein S100-A11 OS=Homo sapiens OX=9606 GN=S100A11 PE=1 SV=2	61.3475
O43390	Heterogeneous nuclear ribonucleoprotein R OS=Homo sapiens OX=9606 GN=HNRNPR PE=1 SV=1	59.95
P35232	Prohibitin OS=Homo sapiens OX=9606 GN=PHB PE=1 SV=1	59.3345
P07355	Annexin A2 OS=Homo sapiens OX=9606 GN=ANXA2 PE=1 SV=2	57.255
P12270	Nucleoprotein TPR OS=Homo sapiens OX=9606 GN=TPR PE=1 SV=3	57.2276
Q15645	Pachytene checkpoint protein 2 homolog OS=Homo sapiens OX=9606 GN=TRIP13 PE=1 SV=2	56.7931
O60506	Heterogeneous nuclear ribonucleoprotein Q OS=Homo sapiens OX=9606 GN=SYNCRIP PE=1 SV=2	55.8622
P09529	Inhibin beta B chain OS=Homo sapiens OX=9606 GN=INHBB PE=1 SV=2	55.8113
O15143	Actin-related protein 2/3 complex subunit 1B OS=Homo sapiens OX=9606 GN=ARPC1B PE=1 SV=3	55.1651
Q9NVA2	Septin-11 OS=Homo sapiens OX=9606 GN=SEPTIN11 PE=1 SV=3	54.6245
Q16698	2,4-dienoyl-CoA reductase, mitochondrial OS=Homo sapiens OX=9606 GN=DECR1 PE=1 SV=1	53.9752
P01011	Alpha-1-antichymotrypsin OS=Homo sapiens OX=9606 GN=SERPINA3 PE=1 SV=2	53.9669
Q15942	Zyxin OS=Homo sapiens OX=9606 GN=ZYX PE=1 SV=1	51.9379
P33993	DNA replication licensing factor MCM7 OS=Homo sapiens OX=9606 GN=MCM7 PE=1 SV=4	51.7229
P04083	Annexin A1 OS=Homo sapiens OX=9606 GN=ANXA1 PE=1 SV=2	50.3296
P42167	Lamina-associated polypeptide 2, isoforms beta/gamma OS=Homo sapiens OX=9606 GN=TMPO PE=1 SV=2	48.5653
P21796	Voltage-dependent anion-selective channel protein 1 OS=Homo sapiens OX=9606 GN=VDAC1 PE=1 SV=2	48.5498
P13987	CD59 glycoprotein OS=Homo sapiens OX=9606 GN=CD59 PE=1 SV=1	46.9882
Q07020	60S ribosomal protein L18 OS=Homo sapiens OX=9606 GN=RPL18 PE=1 SV=2	46.9497
P60174	Triosephosphate isomerase OS=Homo sapiens OX=9606 GN=TPI1 PE=1 SV=3	46.9449
Q12906	Interleukin enhancer-binding factor 3 OS=Homo sapiens OX=9606 GN=ILF3 PE=1 SV=3	46.8392
P23381	Tryptophan--tRNA ligase, cytoplasmic OS=Homo sapiens OX=9606 GN=WARS PE=1 SV=2	44.5684
Q05639	Elongation factor 1-alpha 2 OS=Homo sapiens OX=9606 GN=EEF1A2 PE=1 SV=1	44.1645
P62081	40S ribosomal protein S7 OS=Homo sapiens OX=9606 GN=RPS7 PE=1 SV=1	44.0273
Q00889	Pregnancy-specific beta-1-glycoprotein 6 OS=Homo sapiens OX=9606 GN=PSG6 PE=2 SV=1	43.8956
P14868	Aspartate--tRNA ligase, cytoplasmic OS=Homo sapiens OX=9606 GN=DARS PE=1 SV=2	42.5466
P18669;Q8N0Y7	Phosphoglycerate mutase 1 OS=Homo sapiens OX=9606 GN=PGAM1 PE=1 SV=2	42.1426
P07099	Epoxide hydrolase 1 OS=Homo sapiens OX=9606 GN=EPHX1 PE=1 SV=1	40.6699
O75911	Short-chain dehydrogenase/reductase 3 OS=Homo sapiens OX=9606 GN=DHRS3 PE=1 SV=2	40.1217
P16035	Metalloproteinase inhibitor 2 OS=Homo sapiens OX=9606 GN=TIMP2 PE=1 SV=2	39.6197
Q14451	Growth factor receptor-bound protein 7 OS=Homo sapiens OX=9606 GN=GRB7 PE=1 SV=2	38.9451
Q99714	3-hydroxyacyl-CoA dehydrogenase type-2 OS=Homo sapiens OX=9606 GN=HSD17B10 PE=1 SV=3	38.9431
Q07065	Cytoskeleton-associated protein 4 OS=Homo sapiens OX=9606 GN=CKAP4 PE=1 SV=2	38.7307
Q8NC51	Plasminogen activator inhibitor 1 RNA-binding protein OS=Homo sapiens OX=9606 GN=SERBP1 PE=1 SV=2	38.1849
O76021	Ribosomal L1 domain-containing protein 1 OS=Homo sapiens OX=9606 GN=RSL1D1 PE=1 SV=3	37.822
Q7L1T6	Cytochrome b5 reductase 4 OS=Homo sapiens OX=9606 GN=CYB5R4 PE=1 SV=1	37.19
O60701	UDP-glucose 6-dehydrogenase OS=Homo sapiens OX=9606 GN=UGDH PE=1 SV=1	37.1675
P18124	60S ribosomal protein L7 OS=Homo sapiens OX=9606 GN=RPL7 PE=1 SV=1	36.7032
P31948	Stress-induced-phosphoprotein 1 OS=Homo sapiens OX=9606 GN=STIP1 PE=1 SV=1	35.5844
P26368	Splicing factor U2AF 65 kDa subunit OS=Homo sapiens OX=9606 GN=U2AF2 PE=1 SV=4	35.511
P00367	Glutamate dehydrogenase 1, mitochondrial OS=Homo sapiens OX=9606 GN=GLUD1 PE=1 SV=2	34.7682
P11182	Lipoamide acyltransferase component of branched-chain alpha-keto acid dehydrogenase complex, mitochondrial OS=Homo sapiens OX=9606 GN=DBT PE=1 SV=3	34.4957
P0DMV9;P0DMV8	Heat shock 70 kDa protein 1B OS=Homo sapiens OX=9606 GN=HSPA1B PE=1 SV=1	34.1049
P13667	Protein disulfide-isomerase A4 OS=Homo sapiens OX=9606 GN=PDIA4 PE=1 SV=2	33.5383
Q99543	DnaJ homolog subfamily C member 2 OS=Homo sapiens OX=9606 GN=DNAJC2 PE=1 SV=4	32.6694
P24752	Acetyl-CoA acetyltransferase, mitochondrial OS=Homo sapiens OX=9606 GN=ACAT1 PE=1 SV=1	32.228
Q719I0	Putative activator of 90 kDa heat shock protein ATPase homolog 2 OS=Homo sapiens OX=9606 GN=AHSA2P PE=5 SV=2	31.9234
Q15223	Nectin-1 OS=Homo sapiens OX=9606 GN=NECTIN1 PE=1 SV=3	31.3346
P07737	Profilin-1 OS=Homo sapiens OX=9606 GN=PFN1 PE=1 SV=2	30.5396
Q5VTE0;P02993;P04720;P10126;P13549;P20001;P27706;Q90835	Putative elongation factor 1-alpha-like 3 OS=Homo sapiens OX=9606 GN=EEF1A1P5 PE=5 SV=1	28.1345
Q6YN16	Hydroxysteroid dehydrogenase-like protein 2 OS=Homo sapiens OX=9606 GN=HSDL2 PE=1 SV=1	27.3258
O75390	Citrate synthase, mitochondrial OS=Homo sapiens OX=9606 GN=CS PE=1 SV=2	26.7055
Q99623	Prohibitin-2 OS=Homo sapiens OX=9606 GN=PHB2 PE=1 SV=2	26.6089
P06756	Integrin alpha-V OS=Homo sapiens OX=9606 GN=ITGAV PE=1 SV=2	26.4181
Q9BTT0	Acidic leucine-rich nuclear phosphoprotein 32 family member E OS=Homo sapiens OX=9606 GN=ANP32E PE=1 SV=1	26.2317
P17022	Zinc finger protein 18 OS=Homo sapiens OX=9606 GN=ZNF18 PE=1 SV=2	25.9281
P55084	Trifunctional enzyme subunit beta, mitochondrial OS=Homo sapiens OX=9606 GN=HADHB PE=1 SV=3	24.8421
Q00688	Peptidyl-prolyl cis-trans isomerase FKBP3 OS=Homo sapiens OX=9606 GN=FKBP3 PE=1 SV=1	24.1343
P09467;O00757	Fructose-1,6-bisphosphatase 1 OS=Homo sapiens OX=9606 GN=FBP1 PE=1 SV=5	22.9108
O94826	Mitochondrial import receptor subunit TOM70 OS=Homo sapiens OX=9606 GN=TOMM70 PE=1 SV=1	21.7758
Q07666	KH domain-containing, RNA-binding, signal transduction-associated protein 1 OS=Homo sapiens OX=9606 GN=KHDRBS1 PE=1 SV=1	21.7559
P00505	Aspartate aminotransferase, mitochondrial OS=Homo sapiens OX=9606 GN=GOT2 PE=1 SV=3	21.7399
P84103	Serine/arginine-rich splicing factor 3 OS=Homo sapiens OX=9606 GN=SRSF3 PE=1 SV=1	21.2789
P62736;P63267	Actin, aortic smooth muscle OS=Homo sapiens OX=9606 GN=ACTA2 PE=1 SV=1	21.1685
Q16851	UTP--glucose-1-phosphate uridylyltransferase OS=Homo sapiens OX=9606 GN=UGP2 PE=1 SV=5	20.3272
Q9BRK5	45 kDa calcium-binding protein OS=Homo sapiens OX=9606 GN=SDF4 PE=1 SV=1	19.7913
P13073	Cytochrome c oxidase subunit 4 isoform 1, mitochondrial OS=Homo sapiens OX=9606 GN=COX4I1 PE=1 SV=1	19.2929
Q14980	Nuclear mitotic apparatus protein 1 OS=Homo sapiens OX=9606 GN=NUMA1 PE=1 SV=2	19.273
Q96B97	SH3 domain-containing kinase-binding protein 1 OS=Homo sapiens OX=9606 GN=SH3KBP1 PE=1 SV=2	19.2435
Q9UHD8	Septin-9 OS=Homo sapiens OX=9606 GN=SEPTIN9 PE=1 SV=2	19.1097
P45974	Ubiquitin carboxyl-terminal hydrolase 5 OS=Homo sapiens OX=9606 GN=USP5 PE=1 SV=2	19.0714
P05198	Eukaryotic translation initiation factor 2 subunit 1 OS=Homo sapiens OX=9606 GN=EIF2S1 PE=1 SV=3	18.9395
P50395	Rab GDP dissociation inhibitor beta OS=Homo sapiens OX=9606 GN=GDI2 PE=1 SV=2	18.8277
Q9NWQ4	G patch domain-containing protein 2-like OS=Homo sapiens OX=9606 GN=GPATCH2L PE=1 SV=3	18.5839
Q96E39;P38159	RNA binding motif protein, X-linked-like-1 OS=Homo sapiens OX=9606 GN=RBMXL1 PE=1 SV=1	18.2798
P17301	Integrin alpha-2 OS=Homo sapiens OX=9606 GN=ITGA2 PE=1 SV=1	18.118
Q13547	Histone deacetylase 1 OS=Homo sapiens OX=9606 GN=HDAC1 PE=1 SV=1	17.1783
P62241	40S ribosomal protein S8 OS=Homo sapiens OX=9606 GN=RPS8 PE=1 SV=2	17.0743
Q6UXS9	Inactive caspase-12 OS=Homo sapiens OX=9606 GN=CASP12 PE=2 SV=3	16.6426
P30044	Peroxiredoxin-5, mitochondrial OS=Homo sapiens OX=9606 GN=PRDX5 PE=1 SV=4	16.5868
P68371;P04350;Q3ZCM7	Tubulin beta-4B chain OS=Homo sapiens OX=9606 GN=TUBB4B PE=1 SV=1	16.4786
P04259;P02538;P48668	Keratin, type II cytoskeletal 6B OS=Homo sapiens OX=9606 GN=KRT6B PE=1 SV=5	16.0145
P45973	Chromobox protein homolog 5 OS=Homo sapiens OX=9606 GN=CBX5 PE=1 SV=1	15.2839
Q92499	ATP-dependent RNA helicase DDX1 OS=Homo sapiens OX=9606 GN=DDX1 PE=1 SV=2	14.2424
P61604	10 kDa heat shock protein, mitochondrial OS=Homo sapiens OX=9606 GN=HSPE1 PE=1 SV=2	13.8531
P08865	40S ribosomal protein SA OS=Homo sapiens OX=9606 GN=RPSA PE=1 SV=4	13.208
P30086	Phosphatidylethanolamine-binding protein 1 OS=Homo sapiens OX=9606 GN=PEBP1 PE=1 SV=3	12.5669
P38646	Stress-70 protein, mitochondrial OS=Homo sapiens OX=9606 GN=HSPA9 PE=1 SV=2	12.5148
Q9HC52	Chromobox protein homolog 8 OS=Homo sapiens OX=9606 GN=CBX8 PE=1 SV=3	12.0957
P28331	NADH-ubiquinone oxidoreductase 75 kDa subunit, mitochondrial OS=Homo sapiens OX=9606 GN=NDUFS1 PE=1 SV=3	11.6123
P26373	60S ribosomal protein L13 OS=Homo sapiens OX=9606 GN=RPL13 PE=1 SV=4	11.2341
Q15293	Reticulocalbin-1 OS=Homo sapiens OX=9606 GN=RCN1 PE=1 SV=1	10.3729
P34897	Serine hydroxymethyltransferase, mitochondrial OS=Homo sapiens OX=9606 GN=SHMT2 PE=1 SV=3	9.93373
P23246	Splicing factor, proline- and glutamine-rich OS=Homo sapiens OX=9606 GN=SFPQ PE=1 SV=2	9.86289
Q16719	Kynureninase OS=Homo sapiens OX=9606 GN=KYNU PE=1 SV=1	9.82196
Q9H4M7	Pleckstrin homology domain-containing family A member 4 OS=Homo sapiens OX=9606 GN=PLEKHA4 PE=1 SV=2	9.77745
Q9H9Q2	COP9 signalosome complex subunit 7b OS=Homo sapiens OX=9606 GN=COPS7B PE=1 SV=1	9.04749
P24534	Elongation factor 1-beta OS=Homo sapiens OX=9606 GN=EEF1B2 PE=1 SV=3	8.92461
Q8IX12	Cell division cycle and apoptosis regulator protein 1 OS=Homo sapiens OX=9606 GN=CCAR1 PE=1 SV=2	8.24014
P15880	40S ribosomal protein S2 OS=Homo sapiens OX=9606 GN=RPS2 PE=1 SV=2	8.16431
P78386	Keratin, type II cuticular Hb5 OS=Homo sapiens OX=9606 GN=KRT85 PE=1 SV=1	8.08736
P42166	Lamina-associated polypeptide 2, isoform alpha OS=Homo sapiens OX=9606 GN=TMPO PE=1 SV=2	7.57599
P30041	Peroxiredoxin-6 OS=Homo sapiens OX=9606 GN=PRDX6 PE=1 SV=3	7.54026
P43304	Glycerol-3-phosphate dehydrogenase, mitochondrial OS=Homo sapiens OX=9606 GN=GPD2 PE=1 SV=3	7.49415
Q96HE7	ERO1-like protein alpha OS=Homo sapiens OX=9606 GN=ERO1A PE=1 SV=2	6.7404
Q04837	Single-stranded DNA-binding protein, mitochondrial OS=Homo sapiens OX=9606 GN=SSBP1 PE=1 SV=1	6.23979
Q04725	Transducin-like enhancer protein 2 OS=Homo sapiens OX=9606 GN=TLE2 PE=1 SV=2	6.12151
Q9H0U4	Ras-related protein Rab-1B OS=Homo sapiens OX=9606 GN=RAB1B PE=1 SV=1	6.09176
P11498	Pyruvate carboxylase, mitochondrial OS=Homo sapiens OX=9606 GN=PC PE=1 SV=2	5.78125
P49748	Very long-chain specific acyl-CoA dehydrogenase, mitochondrial OS=Homo sapiens OX=9606 GN=ACADVL PE=1 SV=1	5.2334
P15559	NAD(P)H dehydrogenase [quinone] 1 OS=Homo sapiens OX=9606 GN=NQO1 PE=1 SV=1	4.84088
Q92688	Acidic leucine-rich nuclear phosphoprotein 32 family member B OS=Homo sapiens OX=9606 GN=ANP32B PE=1 SV=1	4.74088
P07437;A6NNZ2;Q13509	Tubulin beta chain OS=Homo sapiens OX=9606 GN=TUBB PE=1 SV=2	4.55335
P06744	Glucose-6-phosphate isomerase OS=Homo sapiens OX=9606 GN=GPI PE=1 SV=4	3.44991
O43169	Cytochrome b5 type B OS=Homo sapiens OX=9606 GN=CYB5B PE=1 SV=3	3.27141
Q9BQE3;Q9NY65	Tubulin alpha-1C chain OS=Homo sapiens OX=9606 GN=TUBA1C PE=1 SV=1	3.05112
P23396	40S ribosomal protein S3 OS=Homo sapiens OX=9606 GN=RPS3 PE=1 SV=2	2.58665
P68104	Elongation factor 1-alpha 1 OS=Homo sapiens OX=9606 GN=EEF1A1 PE=1 SV=1	2.53036
Q9H0C2	ADP/ATP translocase 4 OS=Homo sapiens OX=9606 GN=SLC25A31 PE=2 SV=1	2.522
Q2M296	Methenyltetrahydrofolate synthase domain-containing protein OS=Homo sapiens OX=9606 GN=MTHFSD PE=1 SV=2	2.35313
Q15181	Inorganic pyrophosphatase OS=Homo sapiens OX=9606 GN=PPA1 PE=1 SV=2	2.27872
P07108	Acyl-CoA-binding protein OS=Homo sapiens OX=9606 GN=DBI PE=1 SV=2	1.82762
P62750	60S ribosomal protein L23a OS=Homo sapiens OX=9606 GN=RPL23A PE=1 SV=1	1.77795
P62424	60S ribosomal protein L7a OS=Homo sapiens OX=9606 GN=RPL7A PE=1 SV=2	1.75729
P25815	Protein S100-P OS=Homo sapiens OX=9606 GN=S100P PE=1 SV=2	1.74257
P51659	Peroxisomal multifunctional enzyme type 2 OS=Homo sapiens OX=9606 GN=HSD17B4 PE=1 SV=3	1.48373
O14818;Q8TAA3	Proteasome subunit alpha type-7 OS=Homo sapiens OX=9606 GN=PSMA7 PE=1 SV=1	1.43817
Q8TAD2	Interleukin-17D OS=Homo sapiens OX=9606 GN=IL17D PE=2 SV=1	1.43151
Q9BUJ2	Heterogeneous nuclear ribonucleoprotein U-like protein 1 OS=Homo sapiens OX=9606 GN=HNRNPUL1 PE=1 SV=2	1.42393
P62820;P61006	Ras-related protein Rab-1A OS=Homo sapiens OX=9606 GN=RAB1A PE=1 SV=3	1.07671
P29508	Serpin B3 OS=Homo sapiens OX=9606 GN=SERPINB3 PE=1 SV=2	1.02954
P62906	60S ribosomal protein L10a OS=Homo sapiens OX=9606 GN=RPL10A PE=1 SV=2	0.980304
P84243	Histone H3.3 OS=Homo sapiens OX=9606 GN=H3F3A PE=1 SV=2	0.974512
Q96KP4	Cytosolic non-specific dipeptidase OS=Homo sapiens OX=9606 GN=CNDP2 PE=1 SV=2	0.904014
P63162;P14678	Small nuclear ribonucleoprotein-associated protein N OS=Homo sapiens OX=9606 GN=SNRPN PE=1 SV=1	0.82727
P62140	Serine/threonine-protein phosphatase PP1-beta catalytic subunit OS=Homo sapiens OX=9606 GN=PPP1CB PE=1 SV=3	0.713024
P55072	Transitional endoplasmic reticulum ATPase OS=Homo sapiens OX=9606 GN=VCP PE=1 SV=4	0.689302
P04040	Catalase OS=Homo sapiens OX=9606 GN=CAT PE=1 SV=3	0.654985
Q9ULN7	Paraneoplastic antigen-like protein 8B OS=Homo sapiens OX=9606 GN=PNMA8B PE=2 SV=4	0.621479
Q07955	Serine/arginine-rich splicing factor 1 OS=Homo sapiens OX=9606 GN=SRSF1 PE=1 SV=2	0.614241
P07954	Fumarate hydratase, mitochondrial OS=Homo sapiens OX=9606 GN=FH PE=1 SV=3	0.606925
P30040	Endoplasmic reticulum resident protein 29 OS=Homo sapiens OX=9606 GN=ERP29 PE=1 SV=4	0.59021
P05388	60S acidic ribosomal protein P0 OS=Homo sapiens OX=9606 GN=RPLP0 PE=1 SV=1	0.526365
P13804	Electron transfer flavoprotein subunit alpha, mitochondrial OS=Homo sapiens OX=9606 GN=ETFA PE=1 SV=1	0.51494
P07602	Prosaposin OS=Homo sapiens OX=9606 GN=PSAP PE=1 SV=2	0.464838
Q15233	Non-POU domain-containing octamer-binding protein OS=Homo sapiens OX=9606 GN=NONO PE=1 SV=4	0.461631
P48594	Serpin B4 OS=Homo sapiens OX=9606 GN=SERPINB4 PE=1 SV=2	0.374113
P62753	40S ribosomal protein S6 OS=Homo sapiens OX=9606 GN=RPS6 PE=1 SV=1	0.359739
P05023	Sodium/potassium-transporting ATPase subunit alpha-1 OS=Homo sapiens OX=9606 GN=ATP1A1 PE=1 SV=1	0.282275
Q15084	Protein disulfide-isomerase A6 OS=Homo sapiens OX=9606 GN=PDIA6 PE=1 SV=1	0.207917

## Sheet: 3 - HCC1954FT
	SUPLEMENTARY TABLE 2C - HCC-1954 FT FRACTION PROTEIN MEDIUM ABUNDANCE
Accession	Description	HCC1954 FT Medium
P61604	10 kDa heat shock protein, mitochondrial OS=Homo sapiens OX=9606 GN=HSPE1 PE=1 SV=2	12.2335
P62258	14-3-3 protein epsilon OS=Homo sapiens OX=9606 GN=YWHAE PE=1 SV=1	276.913
Q04917	14-3-3 protein eta OS=Homo sapiens OX=9606 GN=YWHAH PE=1 SV=4	11.5747
P61981	14-3-3 protein gamma OS=Homo sapiens OX=9606 GN=YWHAG PE=1 SV=2	30.9017
P31947	14-3-3 protein sigma OS=Homo sapiens OX=9606 GN=SFN PE=1 SV=1	264.764
P27348	14-3-3 protein theta OS=Homo sapiens OX=9606 GN=YWHAQ PE=1 SV=1	104.532
P63104	14-3-3 protein zeta/delta OS=Homo sapiens OX=9606 GN=YWHAZ PE=1 SV=1	1568.82
Q16698	2,4-dienoyl-CoA reductase, mitochondrial OS=Homo sapiens OX=9606 GN=DECR1 PE=1 SV=1	79.5467
P17980	26S proteasome regulatory subunit 6A OS=Homo sapiens OX=9606 GN=PSMC3 PE=1 SV=3	38.2632
P62280	40S ribosomal protein S11 OS=Homo sapiens OX=9606 GN=RPS11 PE=1 SV=3	104.37
P62277	40S ribosomal protein S13 OS=Homo sapiens OX=9606 GN=RPS13 PE=1 SV=2	62.4439
P39019	40S ribosomal protein S19 OS=Homo sapiens OX=9606 GN=RPS19 PE=1 SV=2	162.791
P15880	40S ribosomal protein S2 OS=Homo sapiens OX=9606 GN=RPS2 PE=1 SV=2	71.8778
P60866	40S ribosomal protein S20 OS=Homo sapiens OX=9606 GN=RPS20 PE=1 SV=1	64.5875
P62854;Q5JNZ5	40S ribosomal protein S26 OS=Homo sapiens OX=9606 GN=RPS26 PE=1 SV=3	264.418
P23396	40S ribosomal protein S3 OS=Homo sapiens OX=9606 GN=RPS3 PE=1 SV=2	15.6574
P62753	40S ribosomal protein S6 OS=Homo sapiens OX=9606 GN=RPS6 PE=1 SV=1	381.255
P62081	40S ribosomal protein S7 OS=Homo sapiens OX=9606 GN=RPS7 PE=1 SV=1	282.442
P62241	40S ribosomal protein S8 OS=Homo sapiens OX=9606 GN=RPS8 PE=1 SV=2	223.699
P08865	40S ribosomal protein SA OS=Homo sapiens OX=9606 GN=RPSA PE=1 SV=4	385.317
Q9BRK5	45 kDa calcium-binding protein OS=Homo sapiens OX=9606 GN=SDF4 PE=1 SV=1	12.6193
P80404	4-aminobutyrate aminotransferase, mitochondrial OS=Homo sapiens OX=9606 GN=ABAT PE=1 SV=3	106.685
P08195	4F2 cell-surface antigen heavy chain OS=Homo sapiens OX=9606 GN=SLC3A2 PE=1 SV=3	890.62
P10809;P18687;P19226	60 kDa heat shock protein, mitochondrial OS=Homo sapiens OX=9606 GN=HSPD1 PE=1 SV=2	2998.42
P05388	60S acidic ribosomal protein P0 OS=Homo sapiens OX=9606 GN=RPLP0 PE=1 SV=1	81.3974
P05387	60S acidic ribosomal protein P2 OS=Homo sapiens OX=9606 GN=RPLP2 PE=1 SV=1	249.519
P27635;Q96L21	60S ribosomal protein L10 OS=Homo sapiens OX=9606 GN=RPL10 PE=1 SV=4	58.7312
P62906	60S ribosomal protein L10a OS=Homo sapiens OX=9606 GN=RPL10A PE=1 SV=2	60.1397
P26373	60S ribosomal protein L13 OS=Homo sapiens OX=9606 GN=RPL13 PE=1 SV=4	429.814
P50914	60S ribosomal protein L14 OS=Homo sapiens OX=9606 GN=RPL14 PE=1 SV=4	23.9088
P61313	60S ribosomal protein L15 OS=Homo sapiens OX=9606 GN=RPL15 PE=1 SV=2	174.72
P18621	60S ribosomal protein L17 OS=Homo sapiens OX=9606 GN=RPL17 PE=1 SV=3	151.054
Q07020	60S ribosomal protein L18 OS=Homo sapiens OX=9606 GN=RPL18 PE=1 SV=2	320.056
Q02543	60S ribosomal protein L18a OS=Homo sapiens OX=9606 GN=RPL18A PE=1 SV=2	34.9367
P46778	60S ribosomal protein L21 OS=Homo sapiens OX=9606 GN=RPL21 PE=1 SV=2	289.401
P35268;Q6P5R6	60S ribosomal protein L22 OS=Homo sapiens OX=9606 GN=RPL22 PE=1 SV=2	122.037
P62750	60S ribosomal protein L23a OS=Homo sapiens OX=9606 GN=RPL23A PE=1 SV=1	297.534
P39023;Q92901	60S ribosomal protein L3 OS=Homo sapiens OX=9606 GN=RPL3 PE=1 SV=2	1297.02
P36578	60S ribosomal protein L4 OS=Homo sapiens OX=9606 GN=RPL4 PE=1 SV=5	176.615
P18124	60S ribosomal protein L7 OS=Homo sapiens OX=9606 GN=RPL7 PE=1 SV=1	46.9716
P62424	60S ribosomal protein L7a OS=Homo sapiens OX=9606 GN=RPL7A PE=1 SV=2	306.281
P32969	60S ribosomal protein L9 OS=Homo sapiens OX=9606 GN=RPL9 PE=1 SV=1	4.2223
P52209	6-phosphogluconate dehydrogenase, decarboxylating OS=Homo sapiens OX=9606 GN=PGD PE=1 SV=3	36.7498
P39687	Acidic leucine-rich nuclear phosphoprotein 32 family member A OS=Homo sapiens OX=9606 GN=ANP32A PE=1 SV=1	131.265
Q92688	Acidic leucine-rich nuclear phosphoprotein 32 family member B OS=Homo sapiens OX=9606 GN=ANP32B PE=1 SV=1	229.96
Q9BTT0	Acidic leucine-rich nuclear phosphoprotein 32 family member E OS=Homo sapiens OX=9606 GN=ANP32E PE=1 SV=1	13.4626
P63261;O18499;O18500;O42161;P02570;P02571;P02572;P04829;P07837;P10983;P10984;P10986;P10987;P12714;P14227;P15475;P17304;P18600;P18601;P18603;P29751;P30162;P30163;P41340;P48975;P49128;P53456;P53471;P53478;P53484;P53485;P53486;P53505;P53506;P60709;P90689;Q00214;Q00215;Q03342;Q25010;Q25472;Q27250;Q92193;Q93129	Actin, cytoplasmic 2 OS=Homo sapiens OX=9606 GN=ACTG1 PE=1 SV=1	8479.57
O15143	Actin-related protein 2/3 complex subunit 1B OS=Homo sapiens OX=9606 GN=ARPC1B PE=1 SV=3	20.0042
P61158	Actin-related protein 3 OS=Homo sapiens OX=9606 GN=ACTR3 PE=1 SV=3	83.4058
P07108	Acyl-CoA-binding protein OS=Homo sapiens OX=9606 GN=DBI PE=1 SV=2	160.789
P23526	Adenosylhomocysteinase OS=Homo sapiens OX=9606 GN=AHCY PE=1 SV=4	294.05
Q9HDC9	Adipocyte plasma membrane-associated protein OS=Homo sapiens OX=9606 GN=APMAP PE=1 SV=2	6.98549
P05141	ADP/ATP translocase 2 OS=Homo sapiens OX=9606 GN=SLC25A5 PE=1 SV=7	555.714
P12236	ADP/ATP translocase 3 OS=Homo sapiens OX=9606 GN=SLC25A6 PE=1 SV=4	273.471
Q9H0C2	ADP/ATP translocase 4 OS=Homo sapiens OX=9606 GN=SLC25A31 PE=2 SV=1	9.16312
P61204;P84077	ADP-ribosylation factor 3 OS=Homo sapiens OX=9606 GN=ARF3 PE=1 SV=2	140.791
P47895	Aldehyde dehydrogenase family 1 member A3 OS=Homo sapiens OX=9606 GN=ALDH1A3 PE=1 SV=2	364.871
P01011	Alpha-1-antichymotrypsin OS=Homo sapiens OX=9606 GN=SERPINA3 PE=1 SV=2	16.4235
P12814	Alpha-actinin-1 OS=Homo sapiens OX=9606 GN=ACTN1 PE=1 SV=2	1227.67
P35609	Alpha-actinin-2 OS=Homo sapiens OX=9606 GN=ACTN2 PE=1 SV=1	51.0505
O43707	Alpha-actinin-4 OS=Homo sapiens OX=9606 GN=ACTN4 PE=1 SV=2	471.767
P06733;O02654;P07322;P07323;P08734;P09104;P13929;P17182;P17183;P19140;P21550;P25704;P42897;P51913;Q27727;Q27877;Q9PVK2;Q9W7L0;Q9W7L1;Q9W7L2	Alpha-enolase OS=Homo sapiens OX=9606 GN=ENO1 PE=1 SV=2	6084.28
P04083	Annexin A1 OS=Homo sapiens OX=9606 GN=ANXA1 PE=1 SV=2	887.429
P07355	Annexin A2 OS=Homo sapiens OX=9606 GN=ANXA2 PE=1 SV=2	339.339
P12429	Annexin A3 OS=Homo sapiens OX=9606 GN=ANXA3 PE=1 SV=3	19.6123
P00966	Argininosuccinate synthase OS=Homo sapiens OX=9606 GN=ASS1 PE=1 SV=2	8.84854
P00505	Aspartate aminotransferase, mitochondrial OS=Homo sapiens OX=9606 GN=GOT2 PE=1 SV=3	455.801
P14868	Aspartate--tRNA ligase, cytoplasmic OS=Homo sapiens OX=9606 GN=DARS PE=1 SV=2	49.3617
P24539	ATP synthase F(0) complex subunit B1, mitochondrial OS=Homo sapiens OX=9606 GN=ATP5PB PE=1 SV=2	3.09953
P25705;P19483	ATP synthase subunit alpha, mitochondrial OS=Homo sapiens OX=9606 GN=ATP5F1A PE=1 SV=1	699.859
P06576	ATP synthase subunit beta, mitochondrial OS=Homo sapiens OX=9606 GN=ATP5F1B PE=1 SV=3	1227.52
Q08211	ATP-dependent RNA helicase A OS=Homo sapiens OX=9606 GN=DHX9 PE=1 SV=4	262.718
Q92499	ATP-dependent RNA helicase DDX1 OS=Homo sapiens OX=9606 GN=DDX1 PE=1 SV=2	40.2612
Q13490	Baculoviral IAP repeat-containing protein 2 OS=Homo sapiens OX=9606 GN=BIRC2 PE=1 SV=2	10.427
P07814	Bifunctional glutamate/proline--tRNA ligase OS=Homo sapiens OX=9606 GN=EPRS PE=1 SV=5	117.061
P31939	Bifunctional purine biosynthesis protein PURH OS=Homo sapiens OX=9606 GN=ATIC PE=1 SV=3	9.67782
P12830	Cadherin-1 OS=Homo sapiens OX=9606 GN=CDH1 PE=1 SV=3	62.105
Q96S95	Calcium/calmodulin-dependent protein kinase II inhibitor 2 OS=Homo sapiens OX=9606 GN=CAMK2N2 PE=2 SV=1	19.2019
P0DP25;P0DP23;P0DP24	Calmodulin-3 OS=Homo sapiens OX=9606 GN=CALM3 PE=1 SV=1	803.95
O43852	Calumenin OS=Homo sapiens OX=9606 GN=CALU PE=1 SV=2	82.0758
P04040	Catalase OS=Homo sapiens OX=9606 GN=CAT PE=1 SV=3	74.096
P21964	Catechol O-methyltransferase OS=Homo sapiens OX=9606 GN=COMT PE=1 SV=2	9.35725
P35221;P26231	Catenin alpha-1 OS=Homo sapiens OX=9606 GN=CTNNA1 PE=1 SV=1	352.009
O60716	Catenin delta-1 OS=Homo sapiens OX=9606 GN=CTNND1 PE=1 SV=1	324.126
P07339	Cathepsin D OS=Homo sapiens OX=9606 GN=CTSD PE=1 SV=1	3686.42
P16070	CD44 antigen OS=Homo sapiens OX=9606 GN=CD44 PE=1 SV=3	13.0644
P13987	CD59 glycoprotein OS=Homo sapiens OX=9606 GN=CD59 PE=1 SV=1	14.4033
P45973	Chromobox protein homolog 5 OS=Homo sapiens OX=9606 GN=CBX5 PE=1 SV=1	12.3346
Q9HC52	Chromobox protein homolog 8 OS=Homo sapiens OX=9606 GN=CBX8 PE=1 SV=3	14.1835
O75390	Citrate synthase, mitochondrial OS=Homo sapiens OX=9606 GN=CS PE=1 SV=2	312.924
Q00610	Clathrin heavy chain 1 OS=Homo sapiens OX=9606 GN=CLTC PE=1 SV=5	800.554
Q96KA5	Cleft lip and palate transmembrane protein 1-like protein OS=Homo sapiens OX=9606 GN=CLPTM1L PE=1 SV=1	50.3355
Q14019	Coactosin-like protein OS=Homo sapiens OX=9606 GN=COTL1 PE=1 SV=3	65.2956
P23528	Cofilin-1 OS=Homo sapiens OX=9606 GN=CFL1 PE=1 SV=3	728.12
Q8IYT3	Coiled-coil domain-containing protein 170 OS=Homo sapiens OX=9606 GN=CCDC170 PE=1 SV=3	12.9012
Q9H9Q2	COP9 signalosome complex subunit 7b OS=Homo sapiens OX=9606 GN=COPS7B PE=1 SV=1	68.9251
O75367	Core histone macro-H2A.1 OS=Homo sapiens OX=9606 GN=H2AFY PE=1 SV=4	352.366
Q9P0M6	Core histone macro-H2A.2 OS=Homo sapiens OX=9606 GN=H2AFY2 PE=1 SV=3	24.8618
P04080	Cystatin-B OS=Homo sapiens OX=9606 GN=CSTB PE=1 SV=2	79.2863
Q9H8E8	Cysteine-rich protein 2-binding protein OS=Homo sapiens OX=9606 GN=KAT14 PE=1 SV=3	26.1843
Q7L1T6	Cytochrome b5 reductase 4 OS=Homo sapiens OX=9606 GN=CYB5R4 PE=1 SV=1	5.32667
O43169	Cytochrome b5 type B OS=Homo sapiens OX=9606 GN=CYB5B PE=1 SV=3	9.26207
P07919	Cytochrome b-c1 complex subunit 6, mitochondrial OS=Homo sapiens OX=9606 GN=UQCRH PE=1 SV=2	16.6806
P13073	Cytochrome c oxidase subunit 4 isoform 1, mitochondrial OS=Homo sapiens OX=9606 GN=COX4I1 PE=1 SV=1	105.032
Q9HBI6	Cytochrome P450 4F11 OS=Homo sapiens OX=9606 GN=CYP4F11 PE=1 SV=3	21.6523
Q07065	Cytoskeleton-associated protein 4 OS=Homo sapiens OX=9606 GN=CKAP4 PE=1 SV=2	107.155
Q8NEM8	Cytosolic carboxypeptidase 3 OS=Homo sapiens OX=9606 GN=AGBL3 PE=2 SV=2	2.54789
O43175	D-3-phosphoglycerate dehydrogenase OS=Homo sapiens OX=9606 GN=PHGDH PE=1 SV=4	420.236
Q14566	DNA replication licensing factor MCM6 OS=Homo sapiens OX=9606 GN=MCM6 PE=1 SV=1	10.8773
P33993	DNA replication licensing factor MCM7 OS=Homo sapiens OX=9606 GN=MCM7 PE=1 SV=4	88.4851
P27695	DNA-(apurinic or apyrimidinic site) lyase OS=Homo sapiens OX=9606 GN=APEX1 PE=1 SV=2	34.0318
P78527	DNA-dependent protein kinase catalytic subunit OS=Homo sapiens OX=9606 GN=PRKDC PE=1 SV=3	7.91809
Q8NHS0	DnaJ homolog subfamily B member 8 OS=Homo sapiens OX=9606 GN=DNAJB8 PE=1 SV=1	5.03221
Q99543	DnaJ homolog subfamily C member 2 OS=Homo sapiens OX=9606 GN=DNAJC2 PE=1 SV=4	4.9608
P04844	Dolichyl-diphosphooligosaccharide--protein glycosyltransferase subunit 2 OS=Homo sapiens OX=9606 GN=RPN2 PE=1 SV=3	140.505
P55265	Double-stranded RNA-specific adenosine deaminase OS=Homo sapiens OX=9606 GN=ADAR PE=1 SV=4	23.7088
Q96FJ2	Dynein light chain 2, cytoplasmic OS=Homo sapiens OX=9606 GN=DYNLL2 PE=1 SV=1	9.39216
P53804	E3 ubiquitin-protein ligase TTC3 OS=Homo sapiens OX=9606 GN=TTC3 PE=1 SV=2	31.1003
P13804	Electron transfer flavoprotein subunit alpha, mitochondrial OS=Homo sapiens OX=9606 GN=ETFA PE=1 SV=1	86.1534
P68104	Elongation factor 1-alpha 1 OS=Homo sapiens OX=9606 GN=EEF1A1 PE=1 SV=1	25.2869
Q05639	Elongation factor 1-alpha 2 OS=Homo sapiens OX=9606 GN=EEF1A2 PE=1 SV=1	40.7146
P29692	Elongation factor 1-delta OS=Homo sapiens OX=9606 GN=EEF1D PE=1 SV=5	123.053
P26641	Elongation factor 1-gamma OS=Homo sapiens OX=9606 GN=EEF1G PE=1 SV=3	574.674
P13639;P05086;P05197;P09445;P58252;Q90705	Elongation factor 2 OS=Homo sapiens OX=9606 GN=EEF2 PE=1 SV=4	576.195
P49411	Elongation factor Tu, mitochondrial OS=Homo sapiens OX=9606 GN=TUFM PE=1 SV=2	206.781
P11021	Endoplasmic reticulum chaperone BiP OS=Homo sapiens OX=9606 GN=HSPA5 PE=1 SV=2	2384.78
Q9BS26	Endoplasmic reticulum resident protein 44 OS=Homo sapiens OX=9606 GN=ERP44 PE=1 SV=1	56.4355
P14625	Endoplasmin OS=Homo sapiens OX=9606 GN=HSP90B1 PE=1 SV=1	1565.57
P42126	Enoyl-CoA delta isomerase 1, mitochondrial OS=Homo sapiens OX=9606 GN=ECI1 PE=1 SV=1	41.4568
P30084	Enoyl-CoA hydratase, mitochondrial OS=Homo sapiens OX=9606 GN=ECHS1 PE=1 SV=4	14.4317
P07099	Epoxide hydrolase 1 OS=Homo sapiens OX=9606 GN=EPHX1 PE=1 SV=1	194.151
O94905	Erlin-2 OS=Homo sapiens OX=9606 GN=ERLIN2 PE=1 SV=1	0.948123
Q96HE7	ERO1-like protein alpha OS=Homo sapiens OX=9606 GN=ERO1A PE=1 SV=2	147.947
P60842	Eukaryotic initiation factor 4A-I OS=Homo sapiens OX=9606 GN=EIF4A1 PE=1 SV=1	352.036
P15170	Eukaryotic peptide chain release factor GTP-binding subunit ERF3A OS=Homo sapiens OX=9606 GN=GSPT1 PE=1 SV=1	62.499
P05198	Eukaryotic translation initiation factor 2 subunit 1 OS=Homo sapiens OX=9606 GN=EIF2S1 PE=1 SV=3	35.8404
P41091;Q2VIR3	Eukaryotic translation initiation factor 2 subunit 3 OS=Homo sapiens OX=9606 GN=EIF2S3 PE=1 SV=3	43.5071
P23588	Eukaryotic translation initiation factor 4B OS=Homo sapiens OX=9606 GN=EIF4B PE=1 SV=2	38.6981
P52907	F-actin-capping protein subunit alpha-1 OS=Homo sapiens OX=9606 GN=CAPZA1 PE=1 SV=3	160.882
Q96I24	Far upstream element-binding protein 3 OS=Homo sapiens OX=9606 GN=FUBP3 PE=1 SV=2	26.75
P49327	Fatty acid synthase OS=Homo sapiens OX=9606 GN=FASN PE=1 SV=3	922.872
Q8N4B4	F-box only protein 39 OS=Homo sapiens OX=9606 GN=FBXO39 PE=2 SV=1	43.8738
Q6PIW4	Fidgetin-like protein 1 OS=Homo sapiens OX=9606 GN=FIGNL1 PE=1 SV=2	11.7961
P21333	Filamin-A OS=Homo sapiens OX=9606 GN=FLNA PE=1 SV=4	4214.18
O75369	Filamin-B OS=Homo sapiens OX=9606 GN=FLNB PE=1 SV=2	368.215
Q14315	Filamin-C OS=Homo sapiens OX=9606 GN=FLNC PE=1 SV=3	229.658
P09467;O00757	Fructose-1,6-bisphosphatase 1 OS=Homo sapiens OX=9606 GN=FBP1 PE=1 SV=5	77.5138
P09972	Fructose-bisphosphate aldolase C OS=Homo sapiens OX=9606 GN=ALDOC PE=1 SV=2	0.671865
P07954	Fumarate hydratase, mitochondrial OS=Homo sapiens OX=9606 GN=FH PE=1 SV=3	67.6311
Q9NWQ4	G patch domain-containing protein 2-like OS=Homo sapiens OX=9606 GN=GPATCH2L PE=1 SV=3	37.8321
P09382	Galectin-1 OS=Homo sapiens OX=9606 GN=LGALS1 PE=1 SV=2	246.726
Q08380	Galectin-3-binding protein OS=Homo sapiens OX=9606 GN=LGALS3BP PE=1 SV=1	29.6181
Q9BSJ2	Gamma-tubulin complex component 2 OS=Homo sapiens OX=9606 GN=TUBGCP2 PE=1 SV=2	119.519
P11413	Glucose-6-phosphate 1-dehydrogenase OS=Homo sapiens OX=9606 GN=G6PD PE=1 SV=4	487.684
P06744	Glucose-6-phosphate isomerase OS=Homo sapiens OX=9606 GN=GPI PE=1 SV=4	445.348
P14314	Glucosidase 2 subunit beta OS=Homo sapiens OX=9606 GN=PRKCSH PE=1 SV=2	183.969
P00367	Glutamate dehydrogenase 1, mitochondrial OS=Homo sapiens OX=9606 GN=GLUD1 PE=1 SV=2	123.099
A0A0B4J2D5;P0DPI2	Glutamine amidotransferase-like class 1 domain-containing protein 3B, mitochondrial OS=Homo sapiens OX=9606 GN=GATD3B PE=1 SV=1	5.56554
P04406;O57672;P04797;P08735;P10096;P16858;P17244;P46406;P51640;Q28554	Glyceraldehyde-3-phosphate dehydrogenase OS=Homo sapiens OX=9606 GN=GAPDH PE=1 SV=3	3641.41
P43304	Glycerol-3-phosphate dehydrogenase, mitochondrial OS=Homo sapiens OX=9606 GN=GPD2 PE=1 SV=3	27.3074
Q9H8Y8	Golgi reassembly-stacking protein 2 OS=Homo sapiens OX=9606 GN=GORASP2 PE=1 SV=3	32.2073
Q14451	Growth factor receptor-bound protein 7 OS=Homo sapiens OX=9606 GN=GRB7 PE=1 SV=2	769.852
Q9HAV7	GrpE protein homolog 1, mitochondrial OS=Homo sapiens OX=9606 GN=GRPEL1 PE=1 SV=2	34.4406
P0DMV9;P0DMV8	Heat shock 70 kDa protein 1B OS=Homo sapiens OX=9606 GN=HSPA1B PE=1 SV=1	863.746
P34931;P02827;P08106;P16627;P55063;Q28222;Q61696;Q91291	Heat shock 70 kDa protein 1-like OS=Homo sapiens OX=9606 GN=HSPA1L PE=1 SV=2	5.98603
P11142;P08108;P08109;P11503;P19120;P19378;P27541;Q06248;Q90473	Heat shock cognate 71 kDa protein OS=Homo sapiens OX=9606 GN=HSPA8 PE=1 SV=1	1842.24
Q12931	Heat shock protein 75 kDa, mitochondrial OS=Homo sapiens OX=9606 GN=TRAP1 PE=1 SV=3	40.8898
P04792	Heat shock protein beta-1 OS=Homo sapiens OX=9606 GN=HSPB1 PE=1 SV=2	604.355
P07900;Q14568;Q58FF6;Q58FG1	Heat shock protein HSP 90-alpha OS=Homo sapiens OX=9606 GN=HSP90AA1 PE=1 SV=5	1446.73
P08238;Q58FF7	Heat shock protein HSP 90-beta OS=Homo sapiens OX=9606 GN=HSP90AB1 PE=1 SV=4	2041.43
P51858	Hepatoma-derived growth factor OS=Homo sapiens OX=9606 GN=HDGF PE=1 SV=1	408.995
P09651;Q32P51	Heterogeneous nuclear ribonucleoprotein A1 OS=Homo sapiens OX=9606 GN=HNRNPA1 PE=1 SV=5	1319.97
P51991	Heterogeneous nuclear ribonucleoprotein A3 OS=Homo sapiens OX=9606 GN=HNRNPA3 PE=1 SV=2	245.233
Q14103	Heterogeneous nuclear ribonucleoprotein D0 OS=Homo sapiens OX=9606 GN=HNRNPD PE=1 SV=1	149.511
P31943	Heterogeneous nuclear ribonucleoprotein H OS=Homo sapiens OX=9606 GN=HNRNPH1 PE=1 SV=4	25.245
P61978	Heterogeneous nuclear ribonucleoprotein K OS=Homo sapiens OX=9606 GN=HNRNPK PE=1 SV=1	322.827
P52272	Heterogeneous nuclear ribonucleoprotein M OS=Homo sapiens OX=9606 GN=HNRNPM PE=1 SV=3	778.326
O60506	Heterogeneous nuclear ribonucleoprotein Q OS=Homo sapiens OX=9606 GN=SYNCRIP PE=1 SV=2	221.792
O43390	Heterogeneous nuclear ribonucleoprotein R OS=Homo sapiens OX=9606 GN=HNRNPR PE=1 SV=1	266.066
Q00839	Heterogeneous nuclear ribonucleoprotein U OS=Homo sapiens OX=9606 GN=HNRNPU PE=1 SV=6	1110.02
Q9BUJ2	Heterogeneous nuclear ribonucleoprotein U-like protein 1 OS=Homo sapiens OX=9606 GN=HNRNPUL1 PE=1 SV=2	83.2541
Q1KMD3	Heterogeneous nuclear ribonucleoprotein U-like protein 2 OS=Homo sapiens OX=9606 GN=HNRNPUL2 PE=1 SV=1	121.728
P09429;B2RPK0	High mobility group protein B1 OS=Homo sapiens OX=9606 GN=HMGB1 PE=1 SV=3	387.039
P26583	High mobility group protein B2 OS=Homo sapiens OX=9606 GN=HMGB2 PE=1 SV=2	113.094
Q13547	Histone deacetylase 1 OS=Homo sapiens OX=9606 GN=HDAC1 PE=1 SV=1	28.86
Q92769	Histone deacetylase 2 OS=Homo sapiens OX=9606 GN=HDAC2 PE=1 SV=2	33.3479
P16403;P10412;P16402	Histone H1.2 OS=Homo sapiens OX=9606 GN=HIST1H1C PE=1 SV=2	94.0725
Q71UI9;P0C0S5	Histone H2A.V OS=Homo sapiens OX=9606 GN=H2AFV PE=1 SV=3	227.162
Q5QNW6;O60814;P02278;P02279;P02282;P06900;P10853;P10854;P14001;P35067;P57053;P58876;P62807;Q00715;Q93078;Q93079;Q93080;Q99877;Q99879;Q99880	Histone H2B type 2-F OS=Homo sapiens OX=9606 GN=HIST2H2BF PE=1 SV=3	257.117
P68431;Q16695;Q6NXT2;Q71DI3	Histone H3.1 OS=Homo sapiens OX=9606 GN=HIST1H3A PE=1 SV=2	10.8925
P84243	Histone H3.3 OS=Homo sapiens OX=9606 GN=H3F3A PE=1 SV=2	81.8273
P62805;P02304;P02306;P02307;P02308;P02310;P02311;P04915;P08436;P35057;P35059;P40287;P50566;Q27443	Histone H4 OS=Homo sapiens OX=9606 GN=HIST1H4A PE=1 SV=2	4721.56
Q4FZB7	Histone-lysine N-methyltransferase KMT5B OS=Homo sapiens OX=9606 GN=KMT5B PE=1 SV=5	51.5969
Q6YN16	Hydroxysteroid dehydrogenase-like protein 2 OS=Homo sapiens OX=9606 GN=HSDL2 PE=1 SV=1	88.4114
P09529	Inhibin beta B chain OS=Homo sapiens OX=9606 GN=INHBB PE=1 SV=2	41.2365
Q15181	Inorganic pyrophosphatase OS=Homo sapiens OX=9606 GN=PPA1 PE=1 SV=2	94.3151
P17301	Integrin alpha-2 OS=Homo sapiens OX=9606 GN=ITGA2 PE=1 SV=1	18.0679
P53708	Integrin alpha-8 OS=Homo sapiens OX=9606 GN=ITGA8 PE=1 SV=3	69.7843
P06756	Integrin alpha-V OS=Homo sapiens OX=9606 GN=ITGAV PE=1 SV=2	1.20454
P05556	Integrin beta-1 OS=Homo sapiens OX=9606 GN=ITGB1 PE=1 SV=2	52.229
P05362	Intercellular adhesion molecule 1 OS=Homo sapiens OX=9606 GN=ICAM1 PE=1 SV=2	47.5738
Q12906	Interleukin enhancer-binding factor 3 OS=Homo sapiens OX=9606 GN=ILF3 PE=1 SV=3	152.828
Q8TAD2	Interleukin-17D OS=Homo sapiens OX=9606 GN=IL17D PE=2 SV=1	4.86076
Q05084	Islet cell autoantigen 1 OS=Homo sapiens OX=9606 GN=ICA1 PE=1 SV=2	14.6867
P48735	Isocitrate dehydrogenase [NADP], mitochondrial OS=Homo sapiens OX=9606 GN=IDH2 PE=1 SV=2	484.754
P14923	Junction plakoglobin OS=Homo sapiens OX=9606 GN=JUP PE=1 SV=3	37.7215
P19012	Keratin, type I cytoskeletal 15 OS=Homo sapiens OX=9606 GN=KRT15 PE=1 SV=3	177.267
P05783;P05784	Keratin, type I cytoskeletal 18 OS=Homo sapiens OX=9606 GN=KRT18 PE=1 SV=2	431.98
P78386	Keratin, type II cuticular Hb5 OS=Homo sapiens OX=9606 GN=KRT85 PE=1 SV=1	3.45229
P04259;P02538;P48668	Keratin, type II cytoskeletal 6B OS=Homo sapiens OX=9606 GN=KRT6B PE=1 SV=5	8.6436
P08729	Keratin, type II cytoskeletal 7 OS=Homo sapiens OX=9606 GN=KRT7 PE=1 SV=5	307.06
P05787	Keratin, type II cytoskeletal 8 OS=Homo sapiens OX=9606 GN=KRT8 PE=1 SV=7	1071.04
Q07666	KH domain-containing, RNA-binding, signal transduction-associated protein 1 OS=Homo sapiens OX=9606 GN=KHDRBS1 PE=1 SV=1	26.203
P01042	Kininogen-1 OS=Homo sapiens OX=9606 GN=KNG1 PE=1 SV=2	10.995
O43278	Kunitz-type protease inhibitor 1 OS=Homo sapiens OX=9606 GN=SPINT1 PE=1 SV=2	49.3403
Q16719	Kynureninase OS=Homo sapiens OX=9606 GN=KYNU PE=1 SV=1	42.7618
P42166	Lamina-associated polypeptide 2, isoform alpha OS=Homo sapiens OX=9606 GN=TMPO PE=1 SV=2	77.0373
P42167	Lamina-associated polypeptide 2, isoforms beta/gamma OS=Homo sapiens OX=9606 GN=TMPO PE=1 SV=2	42.4746
P24043	Laminin subunit alpha-2 OS=Homo sapiens OX=9606 GN=LAMA2 PE=1 SV=4	12.6107
Q14847	LIM and SH3 domain protein 1 OS=Homo sapiens OX=9606 GN=LASP1 PE=1 SV=2	174.769
P11182	Lipoamide acyltransferase component of branched-chain alpha-keto acid dehydrogenase complex, mitochondrial OS=Homo sapiens OX=9606 GN=DBT PE=1 SV=3	35.2734
P23141;Q9UKY3	Liver carboxylesterase 1 OS=Homo sapiens OX=9606 GN=CES1 PE=1 SV=2	9652.24
P00338;Q9BE24	L-lactate dehydrogenase A chain OS=Homo sapiens OX=9606 GN=LDHA PE=1 SV=2	580.201
P10619	Lysosomal protective protein OS=Homo sapiens OX=9606 GN=CTSA PE=1 SV=2	36.4185
Q9NZW5	MAGUK p55 subfamily member 6 OS=Homo sapiens OX=9606 GN=MPP6 PE=1 SV=2	59.3266
P40926	Malate dehydrogenase, mitochondrial OS=Homo sapiens OX=9606 GN=MDH2 PE=1 SV=3	1346.02
Q96LB2	Mas-related G-protein coupled receptor member X1 OS=Homo sapiens OX=9606 GN=MRGPRX1 PE=1 SV=1	13.9954
P16035	Metalloproteinase inhibitor 2 OS=Homo sapiens OX=9606 GN=TIMP2 PE=1 SV=2	13.1052
P51608	Methyl-CpG-binding protein 2 OS=Homo sapiens OX=9606 GN=MECP2 PE=1 SV=1	175.586
P27816	Microtubule-associated protein 4 OS=Homo sapiens OX=9606 GN=MAP4 PE=1 SV=3	645.984
Q96B49	Mitochondrial import receptor subunit TOM6 homolog OS=Homo sapiens OX=9606 GN=TOMM6 PE=1 SV=1	11.6477
O94826	Mitochondrial import receptor subunit TOM70 OS=Homo sapiens OX=9606 GN=TOMM70 PE=1 SV=1	6.99863
P80192	Mitogen-activated protein kinase kinase kinase 9 OS=Homo sapiens OX=9606 GN=MAP3K9 PE=1 SV=3	0.454022
P26038	Moesin OS=Homo sapiens OX=9606 GN=MSN PE=1 SV=3	134.146
Q9NZM1	Myoferlin OS=Homo sapiens OX=9606 GN=MYOF PE=1 SV=1	155.182
P60660	Myosin light polypeptide 6 OS=Homo sapiens OX=9606 GN=MYL6 PE=1 SV=2	537.907
P35580	Myosin-10 OS=Homo sapiens OX=9606 GN=MYH10 PE=1 SV=3	14.739
P35579;P14105;Q62812	Myosin-9 OS=Homo sapiens OX=9606 GN=MYH9 PE=1 SV=4	2382.31
O14745	Na(+)/H(+) exchange regulatory cofactor NHE-RF1 OS=Homo sapiens OX=9606 GN=SLC9A3R1 PE=1 SV=4	35.7324
P15559	NAD(P)H dehydrogenase [quinone] 1 OS=Homo sapiens OX=9606 GN=NQO1 PE=1 SV=1	124.829
P41227	N-alpha-acetyltransferase 10 OS=Homo sapiens OX=9606 GN=NAA10 PE=1 SV=1	391.815
Q15223	Nectin-1 OS=Homo sapiens OX=9606 GN=NECTIN1 PE=1 SV=3	22.3242
Q09666	Neuroblast differentiation-associated protein AHNAK OS=Homo sapiens OX=9606 GN=AHNAK PE=1 SV=2	598.059
Q8N0W4	Neuroligin-4, X-linked OS=Homo sapiens OX=9606 GN=NLGN4X PE=1 SV=1	11.1871
Q14697	Neutral alpha-glucosidase AB OS=Homo sapiens OX=9606 GN=GANAB PE=1 SV=3	1709.01
Q15758	Neutral amino acid transporter B(0) OS=Homo sapiens OX=9606 GN=SLC1A5 PE=1 SV=2	328.647
P43490	Nicotinamide phosphoribosyltransferase OS=Homo sapiens OX=9606 GN=NAMPT PE=1 SV=1	706.744
Q5M9Q1	NKAP-like protein OS=Homo sapiens OX=9606 GN=NKAPL PE=2 SV=3	121.206
Q15233	Non-POU domain-containing octamer-binding protein OS=Homo sapiens OX=9606 GN=NONO PE=1 SV=4	90.0212
Q9GZM8	Nuclear distribution protein nudE-like 1 OS=Homo sapiens OX=9606 GN=NDEL1 PE=1 SV=1	1.62202
Q14980	Nuclear mitotic apparatus protein 1 OS=Homo sapiens OX=9606 GN=NUMA1 PE=1 SV=2	80.2476
P67809	Nuclease-sensitive element-binding protein 1 OS=Homo sapiens OX=9606 GN=YBX1 PE=1 SV=3	56.2567
P19338	Nucleolin OS=Homo sapiens OX=9606 GN=NCL PE=1 SV=3	183.59
P12270	Nucleoprotein TPR OS=Homo sapiens OX=9606 GN=TPR PE=1 SV=3	21.0461
P15531	Nucleoside diphosphate kinase A OS=Homo sapiens OX=9606 GN=NME1 PE=1 SV=1	61.1714
P22392	Nucleoside diphosphate kinase B OS=Homo sapiens OX=9606 GN=NME2 PE=1 SV=1	90.6963
Q5VT03	NUT family member 2D OS=Homo sapiens OX=9606 GN=NUTM2D PE=3 SV=2	7.2553
P04181	Ornithine aminotransferase, mitochondrial OS=Homo sapiens OX=9606 GN=OAT PE=1 SV=1	58.5041
Q15645	Pachytene checkpoint protein 2 homolog OS=Homo sapiens OX=9606 GN=TRIP13 PE=1 SV=2	22.311
P50897	Palmitoyl-protein thioesterase 1 OS=Homo sapiens OX=9606 GN=PPT1 PE=1 SV=1	134.307
Q9ULN7	Paraneoplastic antigen-like protein 8B OS=Homo sapiens OX=9606 GN=PNMA8B PE=2 SV=4	14.0283
P62937	Peptidyl-prolyl cis-trans isomerase A OS=Homo sapiens OX=9606 GN=PPIA PE=1 SV=2	579.484
Q00688	Peptidyl-prolyl cis-trans isomerase FKBP3 OS=Homo sapiens OX=9606 GN=FKBP3 PE=1 SV=1	18.403
Q02790	Peptidyl-prolyl cis-trans isomerase FKBP4 OS=Homo sapiens OX=9606 GN=FKBP4 PE=1 SV=3	54.5707
P30044	Peroxiredoxin-5, mitochondrial OS=Homo sapiens OX=9606 GN=PRDX5 PE=1 SV=4	277.498
P30041	Peroxiredoxin-6 OS=Homo sapiens OX=9606 GN=PRDX6 PE=1 SV=3	71.8329
P51659	Peroxisomal multifunctional enzyme type 2 OS=Homo sapiens OX=9606 GN=HSD17B4 PE=1 SV=3	29.016
P30086	Phosphatidylethanolamine-binding protein 1 OS=Homo sapiens OX=9606 GN=PEBP1 PE=1 SV=3	24.8925
Q16822	Phosphoenolpyruvate carboxykinase [GTP], mitochondrial OS=Homo sapiens OX=9606 GN=PCK2 PE=1 SV=4	52.7051
P00558	Phosphoglycerate kinase 1 OS=Homo sapiens OX=9606 GN=PGK1 PE=1 SV=3	2446.7
P18669;Q8N0Y7	Phosphoglycerate mutase 1 OS=Homo sapiens OX=9606 GN=PGAM1 PE=1 SV=2	308.561
Q16720	Plasma membrane calcium-transporting ATPase 3 OS=Homo sapiens OX=9606 GN=ATP2B3 PE=1 SV=3	14.3376
Q8NC51	Plasminogen activator inhibitor 1 RNA-binding protein OS=Homo sapiens OX=9606 GN=SERBP1 PE=1 SV=2	162.871
Q9H4M7	Pleckstrin homology domain-containing family A member 4 OS=Homo sapiens OX=9606 GN=PLEKHA4 PE=1 SV=2	3.96966
P0CG47;P0CG48;P62987	Polyubiquitin-B OS=Homo sapiens OX=9606 GN=UBB PE=1 SV=1	2.2448
A5A3E0	POTE ankyrin domain family member F OS=Homo sapiens OX=9606 GN=POTEF PE=1 SV=2	15.7902
Q00889	Pregnancy-specific beta-1-glycoprotein 6 OS=Homo sapiens OX=9606 GN=PSG6 PE=2 SV=1	17.2806
P07737	Profilin-1 OS=Homo sapiens OX=9606 GN=PFN1 PE=1 SV=2	415.909
P35232	Prohibitin OS=Homo sapiens OX=9606 GN=PHB PE=1 SV=1	85.7593
Q99623	Prohibitin-2 OS=Homo sapiens OX=9606 GN=PHB2 PE=1 SV=2	137.758
Q9UQ80	Proliferation-associated protein 2G4 OS=Homo sapiens OX=9606 GN=PA2G4 PE=1 SV=3	3.98529
P79522	Proline-rich protein 3 OS=Homo sapiens OX=9606 GN=PRR3 PE=1 SV=2	22.4117
P07602	Prosaposin OS=Homo sapiens OX=9606 GN=PSAP PE=1 SV=2	83.6794
Q9UL46	Proteasome activator complex subunit 2 OS=Homo sapiens OX=9606 GN=PSME2 PE=1 SV=4	381.927
P25788	Proteasome subunit alpha type-3 OS=Homo sapiens OX=9606 GN=PSMA3 PE=1 SV=2	11.9697
O14818;Q8TAA3	Proteasome subunit alpha type-7 OS=Homo sapiens OX=9606 GN=PSMA7 PE=1 SV=1	49.9483
P20618	Proteasome subunit beta type-1 OS=Homo sapiens OX=9606 GN=PSMB1 PE=1 SV=2	35.5824
Q8NFV4	Protein ABHD11 OS=Homo sapiens OX=9606 GN=ABHD11 PE=1 SV=1	14.9515
P30101	Protein disulfide-isomerase A3 OS=Homo sapiens OX=9606 GN=PDIA3 PE=1 SV=4	1951.77
P13667	Protein disulfide-isomerase A4 OS=Homo sapiens OX=9606 GN=PDIA4 PE=1 SV=2	472.549
Q15084	Protein disulfide-isomerase A6 OS=Homo sapiens OX=9606 GN=PDIA6 PE=1 SV=1	412.067
P07237	Protein disulfide-isomerase OS=Homo sapiens OX=9606 GN=P4HB PE=1 SV=3	1876.94
Q9P258	Protein RCC2 OS=Homo sapiens OX=9606 GN=RCC2 PE=1 SV=2	114.009
P31949;O60417;P24480;P50543;Q9UDP3	Protein S100-A11 OS=Homo sapiens OX=9606 GN=S100A11 PE=1 SV=2	311.615
Q86SG5;P31151	Protein S100-A7A OS=Homo sapiens OX=9606 GN=S100A7A PE=1 SV=3	256.015
P05109	Protein S100-A8 OS=Homo sapiens OX=9606 GN=S100A8 PE=1 SV=1	5302.71
P06702	Protein S100-A9 OS=Homo sapiens OX=9606 GN=S100A9 PE=1 SV=1	4035.47
P25815	Protein S100-P OS=Homo sapiens OX=9606 GN=S100P PE=1 SV=2	80.3919
Q99497	Protein/nucleic acid deglycase DJ-1 OS=Homo sapiens OX=9606 GN=PARK7 PE=1 SV=2	74.4125
P21980	Protein-glutamine gamma-glutamyltransferase 2 OS=Homo sapiens OX=9606 GN=TGM2 PE=1 SV=2	1.59429
Q9Y5H0	Protocadherin gamma-A3 OS=Homo sapiens OX=9606 GN=PCDHGA3 PE=2 SV=2	26.6881
Q9Y5G4	Protocadherin gamma-A9 OS=Homo sapiens OX=9606 GN=PCDHGA9 PE=2 SV=1	14.9523
Q719I0	Putative activator of 90 kDa heat shock protein ATPase homolog 2 OS=Homo sapiens OX=9606 GN=AHSA2P PE=5 SV=2	27.1249
Q5VTE0;P02993;P04720;P10126;P13549;P20001;P27706;Q90835	Putative elongation factor 1-alpha-like 3 OS=Homo sapiens OX=9606 GN=EEF1A1P5 PE=5 SV=1	145.188
Q58FG0	Putative heat shock protein HSP 90-alpha A5 OS=Homo sapiens OX=9606 GN=HSP90AA5P PE=2 SV=1	196.211
Q92928	Putative Ras-related protein Rab-1C OS=Homo sapiens OX=9606 GN=RAB1C PE=5 SV=2	0.915763
P11498	Pyruvate carboxylase, mitochondrial OS=Homo sapiens OX=9606 GN=PC PE=1 SV=2	1.45828
P14618;O18919;P11974;P11979;P11980;P11981;P14786;P52480	Pyruvate kinase PKM OS=Homo sapiens OX=9606 GN=PKM PE=1 SV=4	4888.37
P50395	Rab GDP dissociation inhibitor beta OS=Homo sapiens OX=9606 GN=GDI2 PE=1 SV=2	126.633
P46940	Ras GTPase-activating-like protein IQGAP1 OS=Homo sapiens OX=9606 GN=IQGAP1 PE=1 SV=1	120.109
P62820;P61006	Ras-related protein Rab-1A OS=Homo sapiens OX=9606 GN=RAB1A PE=1 SV=3	161.874
Q9H0U4	Ras-related protein Rab-1B OS=Homo sapiens OX=9606 GN=RAB1B PE=1 SV=1	57.3449
P04626	Receptor tyrosine-protein kinase erbB-2 OS=Homo sapiens OX=9606 GN=ERBB2 PE=1 SV=1	748.561
Q9UQ26	Regulating synaptic membrane exocytosis protein 2 OS=Homo sapiens OX=9606 GN=RIMS2 PE=1 SV=2	49.817
P40938	Replication factor C subunit 3 OS=Homo sapiens OX=9606 GN=RFC3 PE=1 SV=2	0.764325
Q15293	Reticulocalbin-1 OS=Homo sapiens OX=9606 GN=RCN1 PE=1 SV=1	43.3396
Q8NET4	Retrotransposon Gag-like protein 9 OS=Homo sapiens OX=9606 GN=RTL9 PE=1 SV=1	15.268
O76021	Ribosomal L1 domain-containing protein 1 OS=Homo sapiens OX=9606 GN=RSL1D1 PE=1 SV=3	95.3692
Q96E39;P38159	RNA binding motif protein, X-linked-like-1 OS=Homo sapiens OX=9606 GN=RBMXL1 PE=1 SV=1	88.914
O75995	SAM and SH3 domain-containing protein 3 OS=Homo sapiens OX=9606 GN=SASH3 PE=1 SV=2	6.34578
P16615	Sarcoplasmic/endoplasmic reticulum calcium ATPase 2 OS=Homo sapiens OX=9606 GN=ATP2A2 PE=1 SV=1	465.322
Q8WVM8	Sec1 family domain-containing protein 1 OS=Homo sapiens OX=9606 GN=SCFD1 PE=1 SV=4	7.23863
Q9NVA2	Septin-11 OS=Homo sapiens OX=9606 GN=SEPTIN11 PE=1 SV=3	40.5455
Q9UHD8	Septin-9 OS=Homo sapiens OX=9606 GN=SEPTIN9 PE=1 SV=2	4.69614
P34897	Serine hydroxymethyltransferase, mitochondrial OS=Homo sapiens OX=9606 GN=SHMT2 PE=1 SV=3	158.151
Q07955	Serine/arginine-rich splicing factor 1 OS=Homo sapiens OX=9606 GN=SRSF1 PE=1 SV=2	0.733541
P84103	Serine/arginine-rich splicing factor 3 OS=Homo sapiens OX=9606 GN=SRSF3 PE=1 SV=1	130.019
P30153	Serine/threonine-protein phosphatase 2A 65 kDa regulatory subunit A alpha isoform OS=Homo sapiens OX=9606 GN=PPP2R1A PE=1 SV=4	65.2964
P62140	Serine/threonine-protein phosphatase PP1-beta catalytic subunit OS=Homo sapiens OX=9606 GN=PPP1CB PE=1 SV=3	31.4254
P29508	Serpin B3 OS=Homo sapiens OX=9606 GN=SERPINB3 PE=1 SV=2	33.2237
P48594	Serpin B4 OS=Homo sapiens OX=9606 GN=SERPINB4 PE=1 SV=2	10.542
P50454	Serpin H1 OS=Homo sapiens OX=9606 GN=SERPINH1 PE=1 SV=2	12.9063
Q96B97	SH3 domain-containing kinase-binding protein 1 OS=Homo sapiens OX=9606 GN=SH3KBP1 PE=1 SV=2	91.4943
Q9UHB9	Signal recognition particle subunit SRP68 OS=Homo sapiens OX=9606 GN=SRP68 PE=1 SV=2	33.08
Q9H7L9	Sin3 histone deacetylase corepressor complex component SDS3 OS=Homo sapiens OX=9606 GN=SUDS3 PE=1 SV=2	620.879
Q04837	Single-stranded DNA-binding protein, mitochondrial OS=Homo sapiens OX=9606 GN=SSBP1 PE=1 SV=1	38.8983
P63162;P14678	Small nuclear ribonucleoprotein-associated protein N OS=Homo sapiens OX=9606 GN=SNRPN PE=1 SV=1	322.253
P05023	Sodium/potassium-transporting ATPase subunit alpha-1 OS=Homo sapiens OX=9606 GN=ATP1A1 PE=1 SV=1	186.335
Q96R06	Sperm-associated antigen 5 OS=Homo sapiens OX=9606 GN=SPAG5 PE=1 SV=2	130.946
Q13838	Spliceosome RNA helicase DDX39B OS=Homo sapiens OX=9606 GN=DDX39B PE=1 SV=1	151.345
P26368	Splicing factor U2AF 65 kDa subunit OS=Homo sapiens OX=9606 GN=U2AF2 PE=1 SV=4	111.655
P23246	Splicing factor, proline- and glutamine-rich OS=Homo sapiens OX=9606 GN=SFPQ PE=1 SV=2	13.5708
Q8WXA9	Splicing regulatory glutamine/lysine-rich protein 1 OS=Homo sapiens OX=9606 GN=SREK1 PE=1 SV=1	157.509
Q7KZF4	Staphylococcal nuclease domain-containing protein 1 OS=Homo sapiens OX=9606 GN=SND1 PE=1 SV=1	198.58
Q9Y365	START domain-containing protein 10 OS=Homo sapiens OX=9606 GN=STARD10 PE=1 SV=2	32.3743
P38646	Stress-70 protein, mitochondrial OS=Homo sapiens OX=9606 GN=HSPA9 PE=1 SV=2	97.7189
P31948	Stress-induced-phosphoprotein 1 OS=Homo sapiens OX=9606 GN=STIP1 PE=1 SV=1	137.472
Q96I99	Succinate--CoA ligase [GDP-forming] subunit beta, mitochondrial OS=Homo sapiens OX=9606 GN=SUCLG2 PE=1 SV=2	345.926
Q9Y6N5	Sulfide:quinone oxidoreductase, mitochondrial OS=Homo sapiens OX=9606 GN=SQOR PE=1 SV=1	105.506
O00445	Synaptotagmin-5 OS=Homo sapiens OX=9606 GN=SYT5 PE=1 SV=2	8.54424
Q16650	T-box brain protein 1 OS=Homo sapiens OX=9606 GN=TBR1 PE=1 SV=1	12.4775
P17987	T-complex protein 1 subunit alpha OS=Homo sapiens OX=9606 GN=TCP1 PE=1 SV=1	99.0699
P78371	T-complex protein 1 subunit beta OS=Homo sapiens OX=9606 GN=CCT2 PE=1 SV=4	256.641
P50991	T-complex protein 1 subunit delta OS=Homo sapiens OX=9606 GN=CCT4 PE=1 SV=4	241.865
P48643	T-complex protein 1 subunit epsilon OS=Homo sapiens OX=9606 GN=CCT5 PE=1 SV=1	115.857
P49368	T-complex protein 1 subunit gamma OS=Homo sapiens OX=9606 GN=CCT3 PE=1 SV=4	274.31
P50990	T-complex protein 1 subunit theta OS=Homo sapiens OX=9606 GN=CCT8 PE=1 SV=4	439.508
P40227	T-complex protein 1 subunit zeta OS=Homo sapiens OX=9606 GN=CCT6A PE=1 SV=3	95.4284
Q8NBS9	Thioredoxin domain-containing protein 5 OS=Homo sapiens OX=9606 GN=TXNDC5 PE=1 SV=2	173.891
P30048	Thioredoxin-dependent peroxide reductase, mitochondrial OS=Homo sapiens OX=9606 GN=PRDX3 PE=1 SV=3	205.076
P62328	Thymosin beta-4 OS=Homo sapiens OX=9606 GN=TMSB4X PE=1 SV=2	141.067
O00267	Transcription elongation factor SPT5 OS=Homo sapiens OX=9606 GN=SUPT5H PE=1 SV=1	14.3208
Q7Z6R9	Transcription factor AP-2-delta OS=Homo sapiens OX=9606 GN=TFAP2D PE=2 SV=1	16.0427
P35712	Transcription factor SOX-6 OS=Homo sapiens OX=9606 GN=SOX6 PE=1 SV=3	12.7253
Q04725	Transducin-like enhancer protein 2 OS=Homo sapiens OX=9606 GN=TLE2 PE=1 SV=2	33.8522
P55072	Transitional endoplasmic reticulum ATPase OS=Homo sapiens OX=9606 GN=VCP PE=1 SV=4	303.108
P29401	Transketolase OS=Homo sapiens OX=9606 GN=TKT PE=1 SV=3	1697.99
P51571	Translocon-associated protein subunit delta OS=Homo sapiens OX=9606 GN=SSR4 PE=1 SV=1	57.6387
P49755	Transmembrane emp24 domain-containing protein 10 OS=Homo sapiens OX=9606 GN=TMED10 PE=1 SV=2	319.481
P40939	Trifunctional enzyme subunit alpha, mitochondrial OS=Homo sapiens OX=9606 GN=HADHA PE=1 SV=2	412.248
P55084	Trifunctional enzyme subunit beta, mitochondrial OS=Homo sapiens OX=9606 GN=HADHB PE=1 SV=3	51.4776
P60174	Triosephosphate isomerase OS=Homo sapiens OX=9606 GN=TPI1 PE=1 SV=3	1113.9
I1YAP6	Tripartite motif-containing protein 77 OS=Homo sapiens OX=9606 GN=TRIM77 PE=2 SV=2	7.81869
Q08J23	tRNA (cytosine(34)-C(5))-methyltransferase OS=Homo sapiens OX=9606 GN=NSUN2 PE=1 SV=2	121.186
P06753	Tropomyosin alpha-3 chain OS=Homo sapiens OX=9606 GN=TPM3 PE=1 SV=2	27.0606
P23381	Tryptophan--tRNA ligase, cytoplasmic OS=Homo sapiens OX=9606 GN=WARS PE=1 SV=2	109.671
Q9BQE3;Q9NY65	Tubulin alpha-1C chain OS=Homo sapiens OX=9606 GN=TUBA1C PE=1 SV=1	13.652
P07437;A6NNZ2;Q13509	Tubulin beta chain OS=Homo sapiens OX=9606 GN=TUBB PE=1 SV=2	45.1976
Q9BVA1;Q13885;Q9BUF5	Tubulin beta-2B chain OS=Homo sapiens OX=9606 GN=TUBB2B PE=1 SV=1	8.70537
P68371;P04350;Q3ZCM7	Tubulin beta-4B chain OS=Homo sapiens OX=9606 GN=TUBB4B PE=1 SV=1	12.3745
P41273	Tumor necrosis factor ligand superfamily member 9 OS=Homo sapiens OX=9606 GN=TNFSF9 PE=1 SV=1	266.18
P09758	Tumor-associated calcium signal transducer 2 OS=Homo sapiens OX=9606 GN=TACSTD2 PE=1 SV=3	42.9311
Q12792	Twinfilin-1 OS=Homo sapiens OX=9606 GN=TWF1 PE=1 SV=3	204.073
Q96RU2	Ubiquitin carboxyl-terminal hydrolase 28 OS=Homo sapiens OX=9606 GN=USP28 PE=1 SV=1	91.6207
P62979	Ubiquitin-40S ribosomal protein S27a OS=Homo sapiens OX=9606 GN=RPS27A PE=1 SV=2	85.3067
P22314	Ubiquitin-like modifier-activating enzyme 1 OS=Homo sapiens OX=9606 GN=UBA1 PE=1 SV=3	381.444
O60701	UDP-glucose 6-dehydrogenase OS=Homo sapiens OX=9606 GN=UGDH PE=1 SV=1	58.6676
Q3C1V1	Uncharacterized protein C11orf91 OS=Homo sapiens OX=9606 GN=C11orf91 PE=2 SV=2	67.3366
Q8IYS4	Uncharacterized protein C16orf71 OS=Homo sapiens OX=9606 GN=C16orf71 PE=2 SV=3	59.5912
Q16851	UTP--glucose-1-phosphate uridylyltransferase OS=Homo sapiens OX=9606 GN=UGP2 PE=1 SV=5	8.72477
P50552	Vasodilator-stimulated phosphoprotein OS=Homo sapiens OX=9606 GN=VASP PE=1 SV=3	57.4657
P49748	Very long-chain specific acyl-CoA dehydrogenase, mitochondrial OS=Homo sapiens OX=9606 GN=ACADVL PE=1 SV=1	46.5479
O75396	Vesicle-trafficking protein SEC22b OS=Homo sapiens OX=9606 GN=SEC22B PE=1 SV=4	15.3807
Q12907	Vesicular integral-membrane protein VIP36 OS=Homo sapiens OX=9606 GN=LMAN2 PE=1 SV=1	26.8216
P21796	Voltage-dependent anion-selective channel protein 1 OS=Homo sapiens OX=9606 GN=VDAC1 PE=1 SV=2	305.344
P45880	Voltage-dependent anion-selective channel protein 2 OS=Homo sapiens OX=9606 GN=VDAC2 PE=1 SV=2	185.974
O75083	WD repeat-containing protein 1 OS=Homo sapiens OX=9606 GN=WDR1 PE=1 SV=4	129.179
P13010	X-ray repair cross-complementing protein 5 OS=Homo sapiens OX=9606 GN=XRCC5 PE=1 SV=3	201.259
P16989	Y-box-binding protein 3 OS=Homo sapiens OX=9606 GN=YBX3 PE=1 SV=4	117.901
A6NP61	ZAR1-like protein OS=Homo sapiens OX=9606 GN=ZAR1L PE=2 SV=2	68.2011
Q8NAP3	Zinc finger and BTB domain-containing protein 38 OS=Homo sapiens OX=9606 GN=ZBTB38 PE=1 SV=2	1.75963
P17022	Zinc finger protein 18 OS=Homo sapiens OX=9606 GN=ZNF18 PE=1 SV=2	19.1915
Q15942	Zyxin OS=Homo sapiens OX=9606 GN=ZYX PE=1 SV=1	59.0877

## Sheet: 4 - MCF7 ME
	SUPLEMENTARY TABLE 2D - MCF-7 ME FRACTION PROTEIN MEDIUM ABUNDANCE
Accession	Description	MCF7 ME Medium
O43707	Alpha-actinin-4 OS=Homo sapiens OX=9606 GN=ACTN4 PE=1 SV=2	47187.3
P17980	26S proteasome regulatory subunit 6A OS=Homo sapiens OX=9606 GN=PSMC3 PE=1 SV=3	36772.6
Q9P2J5	Leucine--tRNA ligase, cytoplasmic OS=Homo sapiens OX=9606 GN=LARS PE=1 SV=2	33731
P21333	Filamin-A OS=Homo sapiens OX=9606 GN=FLNA PE=1 SV=4	7895.12
Q71UI9;P0C0S5	Histone H2A.V OS=Homo sapiens OX=9606 GN=H2AFV PE=1 SV=3	6386.86
O75367	Core histone macro-H2A.1 OS=Homo sapiens OX=9606 GN=H2AFY PE=1 SV=4	6164.32
Q5T089	MORN repeat-containing protein 1 OS=Homo sapiens OX=9606 GN=MORN1 PE=2 SV=2	5140.18
P62805;P02304;P02306;P02307;P02308;P02310;P02311;P04915;P08436;P35057;P35059;P40287;P50566;Q27443	Histone H4 OS=Homo sapiens OX=9606 GN=HIST1H4A PE=1 SV=2	5022.1
P41091;Q2VIR3	Eukaryotic translation initiation factor 2 subunit 3 OS=Homo sapiens OX=9606 GN=EIF2S3 PE=1 SV=3	4319.12
P63261;O18499;O18500;O42161;P02570;P02571;P02572;P04829;P07837;P10983;P10984;P10986;P10987;P12714;P14227;P15475;P17304;P18600;P18601;P18603;P29751;P30162;P30163;P41340;P48975;P49128;P53456;P53471;P53478;P53484;P53485;P53486;P53505;P53506;P60709;P90689;Q00214;Q00215;Q03342;Q25010;Q25472;Q27250;Q92193;Q93129	Actin, cytoplasmic 2 OS=Homo sapiens OX=9606 GN=ACTG1 PE=1 SV=1	3953.36
Q49A26	Putative oxidoreductase GLYR1 OS=Homo sapiens OX=9606 GN=GLYR1 PE=1 SV=4	3913.54
O43175	D-3-phosphoglycerate dehydrogenase OS=Homo sapiens OX=9606 GN=PHGDH PE=1 SV=4	3863.54
Q5QNW6;O60814;P02278;P02279;P02282;P06900;P10853;P10854;P14001;P35067;P57053;P58876;P62807;Q00715;Q93078;Q93079;Q93080;Q99877;Q99879;Q99880	Histone H2B type 2-F OS=Homo sapiens OX=9606 GN=HIST2H2BF PE=1 SV=3	3484.01
P09429;B2RPK0	High mobility group protein B1 OS=Homo sapiens OX=9606 GN=HMGB1 PE=1 SV=3	3303.59
P40926	Malate dehydrogenase, mitochondrial OS=Homo sapiens OX=9606 GN=MDH2 PE=1 SV=3	3195.31
Q00839	Heterogeneous nuclear ribonucleoprotein U OS=Homo sapiens OX=9606 GN=HNRNPU PE=1 SV=6	3183.14
P14618;O18919;P11974;P11979;P11980;P11981;P14786;P52480	Pyruvate kinase PKM OS=Homo sapiens OX=9606 GN=PKM PE=1 SV=4	2754.85
P19338	Nucleolin OS=Homo sapiens OX=9606 GN=NCL PE=1 SV=3	2636.51
P10809;P18687;P19226	60 kDa heat shock protein, mitochondrial OS=Homo sapiens OX=9606 GN=HSPD1 PE=1 SV=2	2567.12
Q09666	Neuroblast differentiation-associated protein AHNAK OS=Homo sapiens OX=9606 GN=AHNAK PE=1 SV=2	2395.39
P27816	Microtubule-associated protein 4 OS=Homo sapiens OX=9606 GN=MAP4 PE=1 SV=3	2186.58
P78371	T-complex protein 1 subunit beta OS=Homo sapiens OX=9606 GN=CCT2 PE=1 SV=4	2046.2
P04792	Heat shock protein beta-1 OS=Homo sapiens OX=9606 GN=HSPB1 PE=1 SV=2	1667.81
P35579;P14105;Q62812	Myosin-9 OS=Homo sapiens OX=9606 GN=MYH9 PE=1 SV=4	1623.06
P49327	Fatty acid synthase OS=Homo sapiens OX=9606 GN=FASN PE=1 SV=3	1544.08
P07339	Cathepsin D OS=Homo sapiens OX=9606 GN=CTSD PE=1 SV=1	1541.39
Q12792	Twinfilin-1 OS=Homo sapiens OX=9606 GN=TWF1 PE=1 SV=3	1514
P25705;P19483	ATP synthase subunit alpha, mitochondrial OS=Homo sapiens OX=9606 GN=ATP5F1A PE=1 SV=1	1368.72
P12814	Alpha-actinin-1 OS=Homo sapiens OX=9606 GN=ACTN1 PE=1 SV=2	1248.69
Q14697	Neutral alpha-glucosidase AB OS=Homo sapiens OX=9606 GN=GANAB PE=1 SV=3	1080.22
P05787	Keratin, type II cytoskeletal 8 OS=Homo sapiens OX=9606 GN=KRT8 PE=1 SV=7	1047.05
P16403;P10412;P16402	Histone H1.2 OS=Homo sapiens OX=9606 GN=HIST1H1C PE=1 SV=2	829.458
P49411	Elongation factor Tu, mitochondrial OS=Homo sapiens OX=9606 GN=TUFM PE=1 SV=2	801.911
P06576	ATP synthase subunit beta, mitochondrial OS=Homo sapiens OX=9606 GN=ATP5F1B PE=1 SV=3	758.915
P0DJG4	Testicular haploid expressed gene protein-like OS=Homo sapiens OX=9606 GN=THEGL PE=2 SV=1	740.965
P26583	High mobility group protein B2 OS=Homo sapiens OX=9606 GN=HMGB2 PE=1 SV=2	717.271
Q14315	Filamin-C OS=Homo sapiens OX=9606 GN=FLNC PE=1 SV=3	701.383
P23141;Q9UKY3	Liver carboxylesterase 1 OS=Homo sapiens OX=9606 GN=CES1 PE=1 SV=2	699.74
Q9H845	Acyl-CoA dehydrogenase family member 9, mitochondrial OS=Homo sapiens OX=9606 GN=ACAD9 PE=1 SV=1	688.89
P27695	DNA-(apurinic or apyrimidinic site) lyase OS=Homo sapiens OX=9606 GN=APEX1 PE=1 SV=2	679.68
P08238;Q58FF7	Heat shock protein HSP 90-beta OS=Homo sapiens OX=9606 GN=HSP90AB1 PE=1 SV=4	640.387
P06733;O02654;P07322;P07323;P08734;P09104;P13929;P17182;P17183;P19140;P21550;P25704;P42897;P51913;Q27727;Q27877;Q9PVK2;Q9W7L0;Q9W7L1;Q9W7L2	Alpha-enolase OS=Homo sapiens OX=9606 GN=ENO1 PE=1 SV=2	606.868
P29692	Elongation factor 1-delta OS=Homo sapiens OX=9606 GN=EEF1D PE=1 SV=5	586.527
P51991	Heterogeneous nuclear ribonucleoprotein A3 OS=Homo sapiens OX=9606 GN=HNRNPA3 PE=1 SV=2	576.868
P04406;O57672;P04797;P08735;P10096;P16858;P17244;P46406;P51640;Q28554	Glyceraldehyde-3-phosphate dehydrogenase OS=Homo sapiens OX=9606 GN=GAPDH PE=1 SV=3	570.114
P51608	Methyl-CpG-binding protein 2 OS=Homo sapiens OX=9606 GN=MECP2 PE=1 SV=1	545.148
P01042	Kininogen-1 OS=Homo sapiens OX=9606 GN=KNG1 PE=1 SV=2	542.232
P35221;P26231	Catenin alpha-1 OS=Homo sapiens OX=9606 GN=CTNNA1 PE=1 SV=1	538.996
P80404	4-aminobutyrate aminotransferase, mitochondrial OS=Homo sapiens OX=9606 GN=ABAT PE=1 SV=3	536.522
P09651;Q32P51	Heterogeneous nuclear ribonucleoprotein A1 OS=Homo sapiens OX=9606 GN=HNRNPA1 PE=1 SV=5	517.048
P07237	Protein disulfide-isomerase OS=Homo sapiens OX=9606 GN=P4HB PE=1 SV=3	503.548
P30084	Enoyl-CoA hydratase, mitochondrial OS=Homo sapiens OX=9606 GN=ECHS1 PE=1 SV=4	495.247
P47895	Aldehyde dehydrogenase family 1 member A3 OS=Homo sapiens OX=9606 GN=ALDH1A3 PE=1 SV=2	480.325
P09382	Galectin-1 OS=Homo sapiens OX=9606 GN=LGALS1 PE=1 SV=2	478.299
Q9NWQ4	G patch domain-containing protein 2-like OS=Homo sapiens OX=9606 GN=GPATCH2L PE=1 SV=3	468.345
P05783;P05784	Keratin, type I cytoskeletal 18 OS=Homo sapiens OX=9606 GN=KRT18 PE=1 SV=2	462.715
Q9BPY3	Protein FAM118B OS=Homo sapiens OX=9606 GN=FAM118B PE=1 SV=1	456.66
P40939	Trifunctional enzyme subunit alpha, mitochondrial OS=Homo sapiens OX=9606 GN=HADHA PE=1 SV=2	451.797
P48735	Isocitrate dehydrogenase [NADP], mitochondrial OS=Homo sapiens OX=9606 GN=IDH2 PE=1 SV=2	439.182
P00558	Phosphoglycerate kinase 1 OS=Homo sapiens OX=9606 GN=PGK1 PE=1 SV=3	418.228
P07900;Q14568;Q58FF6;Q58FG1	Heat shock protein HSP 90-alpha OS=Homo sapiens OX=9606 GN=HSP90AA1 PE=1 SV=5	417.789
Q8WXA9	Splicing regulatory glutamine/lysine-rich protein 1 OS=Homo sapiens OX=9606 GN=SREK1 PE=1 SV=1	417.493
P26641	Elongation factor 1-gamma OS=Homo sapiens OX=9606 GN=EEF1G PE=1 SV=3	416.975
Q16822	Phosphoenolpyruvate carboxykinase [GTP], mitochondrial OS=Homo sapiens OX=9606 GN=PCK2 PE=1 SV=4	401.979
P52272	Heterogeneous nuclear ribonucleoprotein M OS=Homo sapiens OX=9606 GN=HNRNPM PE=1 SV=3	390.792
P11413	Glucose-6-phosphate 1-dehydrogenase OS=Homo sapiens OX=9606 GN=G6PD PE=1 SV=4	363.763
P05141	ADP/ATP translocase 2 OS=Homo sapiens OX=9606 GN=SLC25A5 PE=1 SV=7	362.81
P11021	Endoplasmic reticulum chaperone BiP OS=Homo sapiens OX=9606 GN=HSPA5 PE=1 SV=2	361.84
P17301	Integrin alpha-2 OS=Homo sapiens OX=9606 GN=ITGA2 PE=1 SV=1	360.024
O60716	Catenin delta-1 OS=Homo sapiens OX=9606 GN=CTNND1 PE=1 SV=1	350.665
P60866	40S ribosomal protein S20 OS=Homo sapiens OX=9606 GN=RPS20 PE=1 SV=1	343.393
Q00610	Clathrin heavy chain 1 OS=Homo sapiens OX=9606 GN=CLTC PE=1 SV=5	340.859
P32969	60S ribosomal protein L9 OS=Homo sapiens OX=9606 GN=RPL9 PE=1 SV=1	335.711
Q9P258	Protein RCC2 OS=Homo sapiens OX=9606 GN=RCC2 PE=1 SV=2	326.95
P14625	Endoplasmin OS=Homo sapiens OX=9606 GN=HSP90B1 PE=1 SV=1	326.738
P08865	40S ribosomal protein SA OS=Homo sapiens OX=9606 GN=RPSA PE=1 SV=4	311.803
P50990	T-complex protein 1 subunit theta OS=Homo sapiens OX=9606 GN=CCT8 PE=1 SV=4	303.405
O75531	Barrier-to-autointegration factor OS=Homo sapiens OX=9606 GN=BANF1 PE=1 SV=1	280.697
Q00688	Peptidyl-prolyl cis-trans isomerase FKBP3 OS=Homo sapiens OX=9606 GN=FKBP3 PE=1 SV=1	280.155
P29401	Transketolase OS=Homo sapiens OX=9606 GN=TKT PE=1 SV=3	278.82
P13639;P05086;P05197;P09445;P58252;Q90705	Elongation factor 2 OS=Homo sapiens OX=9606 GN=EEF2 PE=1 SV=4	252.303
P23588	Eukaryotic translation initiation factor 4B OS=Homo sapiens OX=9606 GN=EIF4B PE=1 SV=2	246.361
Q08J23	tRNA (cytosine(34)-C(5))-methyltransferase OS=Homo sapiens OX=9606 GN=NSUN2 PE=1 SV=2	237.629
Q9UQR0	Sex comb on midleg-like protein 2 OS=Homo sapiens OX=9606 GN=SCML2 PE=1 SV=1	230.916
Q15223	Nectin-1 OS=Homo sapiens OX=9606 GN=NECTIN1 PE=1 SV=3	228.99
P46778	60S ribosomal protein L21 OS=Homo sapiens OX=9606 GN=RPL21 PE=1 SV=2	223.683
Q16698	2,4-dienoyl-CoA reductase, mitochondrial OS=Homo sapiens OX=9606 GN=DECR1 PE=1 SV=1	221.355
Q9HC52	Chromobox protein homolog 8 OS=Homo sapiens OX=9606 GN=CBX8 PE=1 SV=3	221.193
P01011	Alpha-1-antichymotrypsin OS=Homo sapiens OX=9606 GN=SERPINA3 PE=1 SV=2	219.509
P04626	Receptor tyrosine-protein kinase erbB-2 OS=Homo sapiens OX=9606 GN=ERBB2 PE=1 SV=1	218.917
P23526	Adenosylhomocysteinase OS=Homo sapiens OX=9606 GN=AHCY PE=1 SV=4	215.405
P33993	DNA replication licensing factor MCM7 OS=Homo sapiens OX=9606 GN=MCM7 PE=1 SV=4	201.047
P00367	Glutamate dehydrogenase 1, mitochondrial OS=Homo sapiens OX=9606 GN=GLUD1 PE=1 SV=2	200.58
P19012	Keratin, type I cytoskeletal 15 OS=Homo sapiens OX=9606 GN=KRT15 PE=1 SV=3	196.399
P30048	Thioredoxin-dependent peroxide reductase, mitochondrial OS=Homo sapiens OX=9606 GN=PRDX3 PE=1 SV=3	196.085
P60660	Myosin light polypeptide 6 OS=Homo sapiens OX=9606 GN=MYL6 PE=1 SV=2	193.171
P16615	Sarcoplasmic/endoplasmic reticulum calcium ATPase 2 OS=Homo sapiens OX=9606 GN=ATP2A2 PE=1 SV=1	192.985
P30101	Protein disulfide-isomerase A3 OS=Homo sapiens OX=9606 GN=PDIA3 PE=1 SV=4	189.65
P15170	Eukaryotic peptide chain release factor GTP-binding subunit ERF3A OS=Homo sapiens OX=9606 GN=GSPT1 PE=1 SV=1	187.357
P05556	Integrin beta-1 OS=Homo sapiens OX=9606 GN=ITGB1 PE=1 SV=2	168.201
P42167	Lamina-associated polypeptide 2, isoforms beta/gamma OS=Homo sapiens OX=9606 GN=TMPO PE=1 SV=2	165.495
P11142;P08108;P08109;P11503;P19120;P19378;P27541;Q06248;Q90473	Heat shock cognate 71 kDa protein OS=Homo sapiens OX=9606 GN=HSPA8 PE=1 SV=1	164.696
Q96I99	Succinate--CoA ligase [GDP-forming] subunit beta, mitochondrial OS=Homo sapiens OX=9606 GN=SUCLG2 PE=1 SV=2	164.039
P62937	Peptidyl-prolyl cis-trans isomerase A OS=Homo sapiens OX=9606 GN=PPIA PE=1 SV=2	162.772
P62979	Ubiquitin-40S ribosomal protein S27a OS=Homo sapiens OX=9606 GN=RPS27A PE=1 SV=2	161.383
P07814	Bifunctional glutamate/proline--tRNA ligase OS=Homo sapiens OX=9606 GN=EPRS PE=1 SV=5	160.098
P05198	Eukaryotic translation initiation factor 2 subunit 1 OS=Homo sapiens OX=9606 GN=EIF2S1 PE=1 SV=3	159.544
Q1KMD3	Heterogeneous nuclear ribonucleoprotein U-like protein 2 OS=Homo sapiens OX=9606 GN=HNRNPUL2 PE=1 SV=1	155.731
Q16181	Septin-7 OS=Homo sapiens OX=9606 GN=SEPTIN7 PE=1 SV=2	153.763
O75369	Filamin-B OS=Homo sapiens OX=9606 GN=FLNB PE=1 SV=2	150.247
P45880	Voltage-dependent anion-selective channel protein 2 OS=Homo sapiens OX=9606 GN=VDAC2 PE=1 SV=2	149.281
P11182	Lipoamide acyltransferase component of branched-chain alpha-keto acid dehydrogenase complex, mitochondrial OS=Homo sapiens OX=9606 GN=DBT PE=1 SV=3	144.182
P39019	40S ribosomal protein S19 OS=Homo sapiens OX=9606 GN=RPS19 PE=1 SV=2	143.095
P42166	Lamina-associated polypeptide 2, isoform alpha OS=Homo sapiens OX=9606 GN=TMPO PE=1 SV=2	141.106
P39748	Flap endonuclease 1 OS=Homo sapiens OX=9606 GN=FEN1 PE=1 SV=1	136.845
Q9Y365	START domain-containing protein 10 OS=Homo sapiens OX=9606 GN=STARD10 PE=1 SV=2	132.22
Q08211	ATP-dependent RNA helicase A OS=Homo sapiens OX=9606 GN=DHX9 PE=1 SV=4	131.13
Q9NVA2	Septin-11 OS=Homo sapiens OX=9606 GN=SEPTIN11 PE=1 SV=3	131.113
P08195	4F2 cell-surface antigen heavy chain OS=Homo sapiens OX=9606 GN=SLC3A2 PE=1 SV=3	128.931
Q9P0M6	Core histone macro-H2A.2 OS=Homo sapiens OX=9606 GN=H2AFY2 PE=1 SV=3	128.029
P49748	Very long-chain specific acyl-CoA dehydrogenase, mitochondrial OS=Homo sapiens OX=9606 GN=ACADVL PE=1 SV=1	123.441
Q92769	Histone deacetylase 2 OS=Homo sapiens OX=9606 GN=HDAC2 PE=1 SV=2	118.433
Q58FG0	Putative heat shock protein HSP 90-alpha A5 OS=Homo sapiens OX=9606 GN=HSP90AA5P PE=2 SV=1	116.171
P60842	Eukaryotic initiation factor 4A-I OS=Homo sapiens OX=9606 GN=EIF4A1 PE=1 SV=1	115.186
Q13547	Histone deacetylase 1 OS=Homo sapiens OX=9606 GN=HDAC1 PE=1 SV=1	114.305
P24534	Elongation factor 1-beta OS=Homo sapiens OX=9606 GN=EEF1B2 PE=1 SV=3	111.927
P17022	Zinc finger protein 18 OS=Homo sapiens OX=9606 GN=ZNF18 PE=1 SV=2	111.665
P22392	Nucleoside diphosphate kinase B OS=Homo sapiens OX=9606 GN=NME2 PE=1 SV=1	106.824
Q00889	Pregnancy-specific beta-1-glycoprotein 6 OS=Homo sapiens OX=9606 GN=PSG6 PE=2 SV=1	106.463
P39023;Q92901	60S ribosomal protein L3 OS=Homo sapiens OX=9606 GN=RPL3 PE=1 SV=2	102.857
Q9UHD8	Septin-9 OS=Homo sapiens OX=9606 GN=SEPTIN9 PE=1 SV=2	101.619
P06702	Protein S100-A9 OS=Homo sapiens OX=9606 GN=S100A9 PE=1 SV=1	94.8415
P43490	Nicotinamide phosphoribosyltransferase OS=Homo sapiens OX=9606 GN=NAMPT PE=1 SV=1	94.3171
P51659	Peroxisomal multifunctional enzyme type 2 OS=Homo sapiens OX=9606 GN=HSD17B4 PE=1 SV=3	93.463
P50991	T-complex protein 1 subunit delta OS=Homo sapiens OX=9606 GN=CCT4 PE=1 SV=4	92.3971
P49755	Transmembrane emp24 domain-containing protein 10 OS=Homo sapiens OX=9606 GN=TMED10 PE=1 SV=2	92.2278
P45973	Chromobox protein homolog 5 OS=Homo sapiens OX=9606 GN=CBX5 PE=1 SV=1	92.0924
P05109	Protein S100-A8 OS=Homo sapiens OX=9606 GN=S100A8 PE=1 SV=1	90.9235
P62258	14-3-3 protein epsilon OS=Homo sapiens OX=9606 GN=YWHAE PE=1 SV=1	90.116
Q3C1V1	Uncharacterized protein C11orf91 OS=Homo sapiens OX=9606 GN=C11orf91 PE=2 SV=2	88.4836
Q14980	Nuclear mitotic apparatus protein 1 OS=Homo sapiens OX=9606 GN=NUMA1 PE=1 SV=2	87.9417
Q8IX12	Cell division cycle and apoptosis regulator protein 1 OS=Homo sapiens OX=9606 GN=CCAR1 PE=1 SV=2	86.8054
P30153	Serine/threonine-protein phosphatase 2A 65 kDa regulatory subunit A alpha isoform OS=Homo sapiens OX=9606 GN=PPP2R1A PE=1 SV=4	80.8499
Q13838	Spliceosome RNA helicase DDX39B OS=Homo sapiens OX=9606 GN=DDX39B PE=1 SV=1	77.6429
P07099	Epoxide hydrolase 1 OS=Homo sapiens OX=9606 GN=EPHX1 PE=1 SV=1	75.3836
Q8NC51	Plasminogen activator inhibitor 1 RNA-binding protein OS=Homo sapiens OX=9606 GN=SERBP1 PE=1 SV=2	74.6594
Q12906	Interleukin enhancer-binding factor 3 OS=Homo sapiens OX=9606 GN=ILF3 PE=1 SV=3	72.2224
O43390	Heterogeneous nuclear ribonucleoprotein R OS=Homo sapiens OX=9606 GN=HNRNPR PE=1 SV=1	69.6035
Q719I0	Putative activator of 90 kDa heat shock protein ATPase homolog 2 OS=Homo sapiens OX=9606 GN=AHSA2P PE=5 SV=2	69.2488
P13073	Cytochrome c oxidase subunit 4 isoform 1, mitochondrial OS=Homo sapiens OX=9606 GN=COX4I1 PE=1 SV=1	67.8106
O60701	UDP-glucose 6-dehydrogenase OS=Homo sapiens OX=9606 GN=UGDH PE=1 SV=1	66.6645
P23528	Cofilin-1 OS=Homo sapiens OX=9606 GN=CFL1 PE=1 SV=3	64.1318
P52209	6-phosphogluconate dehydrogenase, decarboxylating OS=Homo sapiens OX=9606 GN=PGD PE=1 SV=3	61.0776
P52907	F-actin-capping protein subunit alpha-1 OS=Homo sapiens OX=9606 GN=CAPZA1 PE=1 SV=3	60.9506
P62081	40S ribosomal protein S7 OS=Homo sapiens OX=9606 GN=RPS7 PE=1 SV=1	60.872
P31948	Stress-induced-phosphoprotein 1 OS=Homo sapiens OX=9606 GN=STIP1 PE=1 SV=1	57.1401
O15143	Actin-related protein 2/3 complex subunit 1B OS=Homo sapiens OX=9606 GN=ARPC1B PE=1 SV=3	56.3549
Q07666	KH domain-containing, RNA-binding, signal transduction-associated protein 1 OS=Homo sapiens OX=9606 GN=KHDRBS1 PE=1 SV=1	55.6663
Q96B97	SH3 domain-containing kinase-binding protein 1 OS=Homo sapiens OX=9606 GN=SH3KBP1 PE=1 SV=2	54.6404
P63162;P14678	Small nuclear ribonucleoprotein-associated protein N OS=Homo sapiens OX=9606 GN=SNRPN PE=1 SV=1	53.6412
P15313	V-type proton ATPase subunit B, kidney isoform OS=Homo sapiens OX=9606 GN=ATP6V1B1 PE=1 SV=3	53.57
P00505	Aspartate aminotransferase, mitochondrial OS=Homo sapiens OX=9606 GN=GOT2 PE=1 SV=3	52.9688
Q96RQ3	Methylcrotonoyl-CoA carboxylase subunit alpha, mitochondrial OS=Homo sapiens OX=9606 GN=MCCC1 PE=1 SV=3	51.8891
P12830	Cadherin-1 OS=Homo sapiens OX=9606 GN=CDH1 PE=1 SV=3	51.1006
P48643	T-complex protein 1 subunit epsilon OS=Homo sapiens OX=9606 GN=CCT5 PE=1 SV=1	49.6538
P63104	14-3-3 protein zeta/delta OS=Homo sapiens OX=9606 GN=YWHAZ PE=1 SV=1	49.2654
P0DMV9;P0DMV8	Heat shock 70 kDa protein 1B OS=Homo sapiens OX=9606 GN=HSPA1B PE=1 SV=1	47.5344
P07437;A6NNZ2;Q13509	Tubulin beta chain OS=Homo sapiens OX=9606 GN=TUBB PE=1 SV=2	47.0393
Q92900	Regulator of nonsense transcripts 1 OS=Homo sapiens OX=9606 GN=UPF1 PE=1 SV=2	45.1341
P07355	Annexin A2 OS=Homo sapiens OX=9606 GN=ANXA2 PE=1 SV=2	44.6865
P49368	T-complex protein 1 subunit gamma OS=Homo sapiens OX=9606 GN=CCT3 PE=1 SV=4	44.4881
P55084	Trifunctional enzyme subunit beta, mitochondrial OS=Homo sapiens OX=9606 GN=HADHB PE=1 SV=3	44.2734
P40227	T-complex protein 1 subunit zeta OS=Homo sapiens OX=9606 GN=CCT6A PE=1 SV=3	44.0103
Q9UL46	Proteasome activator complex subunit 2 OS=Homo sapiens OX=9606 GN=PSME2 PE=1 SV=4	43.4936
P51571	Translocon-associated protein subunit delta OS=Homo sapiens OX=9606 GN=SSR4 PE=1 SV=1	42.6381
Q5VTE0;P02993;P04720;P10126;P13549;P20001;P27706;Q90835	Putative elongation factor 1-alpha-like 3 OS=Homo sapiens OX=9606 GN=EEF1A1P5 PE=5 SV=1	42.348
P60174	Triosephosphate isomerase OS=Homo sapiens OX=9606 GN=TPI1 PE=1 SV=3	40.2227
P67936	Tropomyosin alpha-4 chain OS=Homo sapiens OX=9606 GN=TPM4 PE=1 SV=3	39.8029
Q9Y6N5	Sulfide:quinone oxidoreductase, mitochondrial OS=Homo sapiens OX=9606 GN=SQOR PE=1 SV=1	39.5056
A5A3E0	POTE ankyrin domain family member F OS=Homo sapiens OX=9606 GN=POTEF PE=1 SV=2	38.9464
P62068	Ubiquitin carboxyl-terminal hydrolase 46 OS=Homo sapiens OX=9606 GN=USP46 PE=1 SV=1	38.8165
O60506	Heterogeneous nuclear ribonucleoprotein Q OS=Homo sapiens OX=9606 GN=SYNCRIP PE=1 SV=2	36.6472
Q2M296	Methenyltetrahydrofolate synthase domain-containing protein OS=Homo sapiens OX=9606 GN=MTHFSD PE=1 SV=2	32.9568
P26038	Moesin OS=Homo sapiens OX=9606 GN=MSN PE=1 SV=3	32.8479
P61978	Heterogeneous nuclear ribonucleoprotein K OS=Homo sapiens OX=9606 GN=HNRNPK PE=1 SV=1	32.2658
P27348	14-3-3 protein theta OS=Homo sapiens OX=9606 GN=YWHAQ PE=1 SV=1	31.5303
P34897	Serine hydroxymethyltransferase, mitochondrial OS=Homo sapiens OX=9606 GN=SHMT2 PE=1 SV=3	30.8015
O75390	Citrate synthase, mitochondrial OS=Homo sapiens OX=9606 GN=CS PE=1 SV=2	30.6979
P06744	Glucose-6-phosphate isomerase OS=Homo sapiens OX=9606 GN=GPI PE=1 SV=4	29.8705
Q92499	ATP-dependent RNA helicase DDX1 OS=Homo sapiens OX=9606 GN=DDX1 PE=1 SV=2	29.819
P22314	Ubiquitin-like modifier-activating enzyme 1 OS=Homo sapiens OX=9606 GN=UBA1 PE=1 SV=3	28.95
Q9H0C2	ADP/ATP translocase 4 OS=Homo sapiens OX=9606 GN=SLC25A31 PE=2 SV=1	28.5996
P31947	14-3-3 protein sigma OS=Homo sapiens OX=9606 GN=SFN PE=1 SV=1	28.1621
Q9BUJ2	Heterogeneous nuclear ribonucleoprotein U-like protein 1 OS=Homo sapiens OX=9606 GN=HNRNPUL1 PE=1 SV=2	27.7914
P35268;Q6P5R6	60S ribosomal protein L22 OS=Homo sapiens OX=9606 GN=RPL22 PE=1 SV=2	27.6718
P23381	Tryptophan--tRNA ligase, cytoplasmic OS=Homo sapiens OX=9606 GN=WARS PE=1 SV=2	27.402
Q53GT1	Kelch-like protein 22 OS=Homo sapiens OX=9606 GN=KLHL22 PE=1 SV=2	27.2513
P14314	Glucosidase 2 subunit beta OS=Homo sapiens OX=9606 GN=PRKCSH PE=1 SV=2	27.1223
P13667	Protein disulfide-isomerase A4 OS=Homo sapiens OX=9606 GN=PDIA4 PE=1 SV=2	26.9059
P51858	Hepatoma-derived growth factor OS=Homo sapiens OX=9606 GN=HDGF PE=1 SV=1	26.8935
A6NP61	ZAR1-like protein OS=Homo sapiens OX=9606 GN=ZAR1L PE=2 SV=2	25.3145
P78386	Keratin, type II cuticular Hb5 OS=Homo sapiens OX=9606 GN=KRT85 PE=1 SV=1	24.1959
P11498	Pyruvate carboxylase, mitochondrial OS=Homo sapiens OX=9606 GN=PC PE=1 SV=2	23.9439
Q9H4M7	Pleckstrin homology domain-containing family A member 4 OS=Homo sapiens OX=9606 GN=PLEKHA4 PE=1 SV=2	21.9184
Q14451	Growth factor receptor-bound protein 7 OS=Homo sapiens OX=9606 GN=GRB7 PE=1 SV=2	21.1618
Q05639	Elongation factor 1-alpha 2 OS=Homo sapiens OX=9606 GN=EEF1A2 PE=1 SV=1	19.664
P62241	40S ribosomal protein S8 OS=Homo sapiens OX=9606 GN=RPS8 PE=1 SV=2	19.3593
Q14103	Heterogeneous nuclear ribonucleoprotein D0 OS=Homo sapiens OX=9606 GN=HNRNPD PE=1 SV=1	18.049
P21796	Voltage-dependent anion-selective channel protein 1 OS=Homo sapiens OX=9606 GN=VDAC1 PE=1 SV=2	17.388
Q99584	Protein S100-A13 OS=Homo sapiens OX=9606 GN=S100A13 PE=1 SV=1	16.6422
P07737	Profilin-1 OS=Homo sapiens OX=9606 GN=PFN1 PE=1 SV=2	15.3074
Q9NZM1	Myoferlin OS=Homo sapiens OX=9606 GN=MYOF PE=1 SV=1	14.5952
P35580	Myosin-10 OS=Homo sapiens OX=9606 GN=MYH10 PE=1 SV=3	14.4974
Q92688	Acidic leucine-rich nuclear phosphoprotein 32 family member B OS=Homo sapiens OX=9606 GN=ANP32B PE=1 SV=1	14.4133
O14818;Q8TAA3	Proteasome subunit alpha type-7 OS=Homo sapiens OX=9606 GN=PSMA7 PE=1 SV=1	13.9602
P62854;Q5JNZ5	40S ribosomal protein S26 OS=Homo sapiens OX=9606 GN=RPS26 PE=1 SV=3	13.6268
P31939	Bifunctional purine biosynthesis protein PURH OS=Homo sapiens OX=9606 GN=ATIC PE=1 SV=3	13.0218
P26373	60S ribosomal protein L13 OS=Homo sapiens OX=9606 GN=RPL13 PE=1 SV=4	12.9163
P30086	Phosphatidylethanolamine-binding protein 1 OS=Homo sapiens OX=9606 GN=PEBP1 PE=1 SV=3	12.8236
P08729	Keratin, type II cytoskeletal 7 OS=Homo sapiens OX=9606 GN=KRT7 PE=1 SV=5	12.286
P16401	Histone H1.5 OS=Homo sapiens OX=9606 GN=HIST1H1B PE=1 SV=3	12.0229
P07954	Fumarate hydratase, mitochondrial OS=Homo sapiens OX=9606 GN=FH PE=1 SV=3	11.9226
P09467;O00757	Fructose-1,6-bisphosphatase 1 OS=Homo sapiens OX=9606 GN=FBP1 PE=1 SV=5	11.3879
Q07020	60S ribosomal protein L18 OS=Homo sapiens OX=9606 GN=RPL18 PE=1 SV=2	10.9533
Q99623	Prohibitin-2 OS=Homo sapiens OX=9606 GN=PHB2 PE=1 SV=2	10.0937
P09529	Inhibin beta B chain OS=Homo sapiens OX=9606 GN=INHBB PE=1 SV=2	10.0709
P13010	X-ray repair cross-complementing protein 5 OS=Homo sapiens OX=9606 GN=XRCC5 PE=1 SV=3	10.0514
P62820;P61006	Ras-related protein Rab-1A OS=Homo sapiens OX=9606 GN=RAB1A PE=1 SV=3	8.38972
P30044	Peroxiredoxin-5, mitochondrial OS=Homo sapiens OX=9606 GN=PRDX5 PE=1 SV=4	8.00127
P16035	Metalloproteinase inhibitor 2 OS=Homo sapiens OX=9606 GN=TIMP2 PE=1 SV=2	7.46688
P17987	T-complex protein 1 subunit alpha OS=Homo sapiens OX=9606 GN=TCP1 PE=1 SV=1	7.29218
Q12931	Heat shock protein 75 kDa, mitochondrial OS=Homo sapiens OX=9606 GN=TRAP1 PE=1 SV=3	7.27999
P04040	Catalase OS=Homo sapiens OX=9606 GN=CAT PE=1 SV=3	6.85661
P46940	Ras GTPase-activating-like protein IQGAP1 OS=Homo sapiens OX=9606 GN=IQGAP1 PE=1 SV=1	6.35491
P00338;Q9BE24	L-lactate dehydrogenase A chain OS=Homo sapiens OX=9606 GN=LDHA PE=1 SV=2	5.61272
A6NIZ1;P61224;P62834	Ras-related protein Rap-1b-like protein OS=Homo sapiens OX=9606 PE=2 SV=1	5.53746
Q96S95	Calcium/calmodulin-dependent protein kinase II inhibitor 2 OS=Homo sapiens OX=9606 GN=CAMK2N2 PE=2 SV=1	5.2896
P15531	Nucleoside diphosphate kinase A OS=Homo sapiens OX=9606 GN=NME1 PE=1 SV=1	5.04643
P50395	Rab GDP dissociation inhibitor beta OS=Homo sapiens OX=9606 GN=GDI2 PE=1 SV=2	5.02948
P14868	Aspartate--tRNA ligase, cytoplasmic OS=Homo sapiens OX=9606 GN=DARS PE=1 SV=2	4.92353
Q96HE7	ERO1-like protein alpha OS=Homo sapiens OX=9606 GN=ERO1A PE=1 SV=2	4.67688
P15559	NAD(P)H dehydrogenase [quinone] 1 OS=Homo sapiens OX=9606 GN=NQO1 PE=1 SV=1	4.60121
Q6YN16	Hydroxysteroid dehydrogenase-like protein 2 OS=Homo sapiens OX=9606 GN=HSDL2 PE=1 SV=1	4.51999
P61769	Beta-2-microglobulin OS=Homo sapiens OX=9606 GN=B2M PE=1 SV=1	4.34596
P00966	Argininosuccinate synthase OS=Homo sapiens OX=9606 GN=ASS1 PE=1 SV=2	4.15359
Q9H9Q2	COP9 signalosome complex subunit 7b OS=Homo sapiens OX=9606 GN=COPS7B PE=1 SV=1	4.12618
P15880	40S ribosomal protein S2 OS=Homo sapiens OX=9606 GN=RPS2 PE=1 SV=2	3.85317
P50897	Palmitoyl-protein thioesterase 1 OS=Homo sapiens OX=9606 GN=PPT1 PE=1 SV=1	3.60229
Q96RU2	Ubiquitin carboxyl-terminal hydrolase 28 OS=Homo sapiens OX=9606 GN=USP28 PE=1 SV=1	3.48424
P04844	Dolichyl-diphosphooligosaccharide--protein glycosyltransferase subunit 2 OS=Homo sapiens OX=9606 GN=RPN2 PE=1 SV=3	3.27022
P26368	Splicing factor U2AF 65 kDa subunit OS=Homo sapiens OX=9606 GN=U2AF2 PE=1 SV=4	3.19794
P12236	ADP/ATP translocase 3 OS=Homo sapiens OX=9606 GN=SLC25A6 PE=1 SV=4	2.92234
P29508	Serpin B3 OS=Homo sapiens OX=9606 GN=SERPINB3 PE=1 SV=2	2.77399
Q15181	Inorganic pyrophosphatase OS=Homo sapiens OX=9606 GN=PPA1 PE=1 SV=2	2.76892
Q99543	DnaJ homolog subfamily C member 2 OS=Homo sapiens OX=9606 GN=DNAJC2 PE=1 SV=4	2.67921
Q16851	UTP--glucose-1-phosphate uridylyltransferase OS=Homo sapiens OX=9606 GN=UGP2 PE=1 SV=5	2.5593
Q04725	Transducin-like enhancer protein 2 OS=Homo sapiens OX=9606 GN=TLE2 PE=1 SV=2	2.5407
P61158	Actin-related protein 3 OS=Homo sapiens OX=9606 GN=ACTR3 PE=1 SV=3	2.19213
P35232	Prohibitin OS=Homo sapiens OX=9606 GN=PHB PE=1 SV=1	2.01138
P84243	Histone H3.3 OS=Homo sapiens OX=9606 GN=H3F3A PE=1 SV=2	1.82536
P25788	Proteasome subunit alpha type-3 OS=Homo sapiens OX=9606 GN=PSMA3 PE=1 SV=2	1.62661
Q9BVA1;Q13885;Q9BUF5	Tubulin beta-2B chain OS=Homo sapiens OX=9606 GN=TUBB2B PE=1 SV=1	1.53785
Q15233	Non-POU domain-containing octamer-binding protein OS=Homo sapiens OX=9606 GN=NONO PE=1 SV=4	1.42098
Q02543	60S ribosomal protein L18a OS=Homo sapiens OX=9606 GN=RPL18A PE=1 SV=2	1.41259
P31949;O60417;P24480;P50543;Q9UDP3	Protein S100-A11 OS=Homo sapiens OX=9606 GN=S100A11 PE=1 SV=2	1.37495
Q7KZF4	Staphylococcal nuclease domain-containing protein 1 OS=Homo sapiens OX=9606 GN=SND1 PE=1 SV=1	1.18011
Q7L1T6	Cytochrome b5 reductase 4 OS=Homo sapiens OX=9606 GN=CYB5R4 PE=1 SV=1	1.13996
Q14019	Coactosin-like protein OS=Homo sapiens OX=9606 GN=COTL1 PE=1 SV=3	1.00735
Q8TAD2	Interleukin-17D OS=Homo sapiens OX=9606 GN=IL17D PE=2 SV=1	0.984025
Q15645	Pachytene checkpoint protein 2 homolog OS=Homo sapiens OX=9606 GN=TRIP13 PE=1 SV=2	0.924768
P23246	Splicing factor, proline- and glutamine-rich OS=Homo sapiens OX=9606 GN=SFPQ PE=1 SV=2	0.817915
O75396	Vesicle-trafficking protein SEC22b OS=Homo sapiens OX=9606 GN=SEC22B PE=1 SV=4	0.555996
P18669;Q8N0Y7	Phosphoglycerate mutase 1 OS=Homo sapiens OX=9606 GN=PGAM1 PE=1 SV=2	0.542364
P61204;P84077	ADP-ribosylation factor 3 OS=Homo sapiens OX=9606 GN=ARF3 PE=1 SV=2	0.464444
Q9HDC9	Adipocyte plasma membrane-associated protein OS=Homo sapiens OX=9606 GN=APMAP PE=1 SV=2	0.413026
Q15084	Protein disulfide-isomerase A6 OS=Homo sapiens OX=9606 GN=PDIA6 PE=1 SV=1	0.0493166

## Sheet: 5 - MCF7 FT
	SUPLEMENTARY TABLE 2E - MCF-7 FT FRACTION PROTEIN MEDIUM ABUNDANCE
Accession	Description	MCF7 FT Medium
P61604	10 kDa heat shock protein, mitochondrial OS=Homo sapiens OX=9606 GN=HSPE1 PE=1 SV=2	3.66063
P62258	14-3-3 protein epsilon OS=Homo sapiens OX=9606 GN=YWHAE PE=1 SV=1	622.124
Q04917	14-3-3 protein eta OS=Homo sapiens OX=9606 GN=YWHAH PE=1 SV=4	68.4152
P61981	14-3-3 protein gamma OS=Homo sapiens OX=9606 GN=YWHAG PE=1 SV=2	199.168
P31947	14-3-3 protein sigma OS=Homo sapiens OX=9606 GN=SFN PE=1 SV=1	146.35
P27348	14-3-3 protein theta OS=Homo sapiens OX=9606 GN=YWHAQ PE=1 SV=1	391.657
P63104	14-3-3 protein zeta/delta OS=Homo sapiens OX=9606 GN=YWHAZ PE=1 SV=1	1031.38
Q16698	2,4-dienoyl-CoA reductase, mitochondrial OS=Homo sapiens OX=9606 GN=DECR1 PE=1 SV=1	97.5943
P17980	26S proteasome regulatory subunit 6A OS=Homo sapiens OX=9606 GN=PSMC3 PE=1 SV=3	56.9205
Q99714	3-hydroxyacyl-CoA dehydrogenase type-2 OS=Homo sapiens OX=9606 GN=HSD17B10 PE=1 SV=3	115.742
P09110	3-ketoacyl-CoA thiolase, peroxisomal OS=Homo sapiens OX=9606 GN=ACAA1 PE=1 SV=2	58.3374
P62280	40S ribosomal protein S11 OS=Homo sapiens OX=9606 GN=RPS11 PE=1 SV=3	55.033
P62277	40S ribosomal protein S13 OS=Homo sapiens OX=9606 GN=RPS13 PE=1 SV=2	37.2867
P39019	40S ribosomal protein S19 OS=Homo sapiens OX=9606 GN=RPS19 PE=1 SV=2	106.394
P15880	40S ribosomal protein S2 OS=Homo sapiens OX=9606 GN=RPS2 PE=1 SV=2	69.1221
P60866	40S ribosomal protein S20 OS=Homo sapiens OX=9606 GN=RPS20 PE=1 SV=1	26.4859
P62854;Q5JNZ5	40S ribosomal protein S26 OS=Homo sapiens OX=9606 GN=RPS26 PE=1 SV=3	297.62
P23396	40S ribosomal protein S3 OS=Homo sapiens OX=9606 GN=RPS3 PE=1 SV=2	51.1404
P62701	40S ribosomal protein S4, X isoform OS=Homo sapiens OX=9606 GN=RPS4X PE=1 SV=2	71.3827
P62753	40S ribosomal protein S6 OS=Homo sapiens OX=9606 GN=RPS6 PE=1 SV=1	454.523
P62081	40S ribosomal protein S7 OS=Homo sapiens OX=9606 GN=RPS7 PE=1 SV=1	327.973
P62241	40S ribosomal protein S8 OS=Homo sapiens OX=9606 GN=RPS8 PE=1 SV=2	478.325
P08865	40S ribosomal protein SA OS=Homo sapiens OX=9606 GN=RPSA PE=1 SV=4	603.42
Q9BRK5	45 kDa calcium-binding protein OS=Homo sapiens OX=9606 GN=SDF4 PE=1 SV=1	7.36839
P80404	4-aminobutyrate aminotransferase, mitochondrial OS=Homo sapiens OX=9606 GN=ABAT PE=1 SV=3	650.954
P08195	4F2 cell-surface antigen heavy chain OS=Homo sapiens OX=9606 GN=SLC3A2 PE=1 SV=3	520.01
P10809;P18687;P19226	60 kDa heat shock protein, mitochondrial OS=Homo sapiens OX=9606 GN=HSPD1 PE=1 SV=2	8367.74
P05388	60S acidic ribosomal protein P0 OS=Homo sapiens OX=9606 GN=RPLP0 PE=1 SV=1	97.1005
P05387	60S acidic ribosomal protein P2 OS=Homo sapiens OX=9606 GN=RPLP2 PE=1 SV=1	693.23
P27635;Q96L21	60S ribosomal protein L10 OS=Homo sapiens OX=9606 GN=RPL10 PE=1 SV=4	10.0893
P62906	60S ribosomal protein L10a OS=Homo sapiens OX=9606 GN=RPL10A PE=1 SV=2	92.9973
P26373	60S ribosomal protein L13 OS=Homo sapiens OX=9606 GN=RPL13 PE=1 SV=4	440.182
P50914	60S ribosomal protein L14 OS=Homo sapiens OX=9606 GN=RPL14 PE=1 SV=4	10.138
P61313	60S ribosomal protein L15 OS=Homo sapiens OX=9606 GN=RPL15 PE=1 SV=2	141.433
P18621	60S ribosomal protein L17 OS=Homo sapiens OX=9606 GN=RPL17 PE=1 SV=3	35.104
Q07020	60S ribosomal protein L18 OS=Homo sapiens OX=9606 GN=RPL18 PE=1 SV=2	163.882
P46778	60S ribosomal protein L21 OS=Homo sapiens OX=9606 GN=RPL21 PE=1 SV=2	428.639
P35268;Q6P5R6	60S ribosomal protein L22 OS=Homo sapiens OX=9606 GN=RPL22 PE=1 SV=2	53.9117
P62750	60S ribosomal protein L23a OS=Homo sapiens OX=9606 GN=RPL23A PE=1 SV=1	322.336
P39023;Q92901	60S ribosomal protein L3 OS=Homo sapiens OX=9606 GN=RPL3 PE=1 SV=2	544.515
P36578	60S ribosomal protein L4 OS=Homo sapiens OX=9606 GN=RPL4 PE=1 SV=5	106.206
P18124	60S ribosomal protein L7 OS=Homo sapiens OX=9606 GN=RPL7 PE=1 SV=1	26.6572
P62424	60S ribosomal protein L7a OS=Homo sapiens OX=9606 GN=RPL7A PE=1 SV=2	225.875
P32969	60S ribosomal protein L9 OS=Homo sapiens OX=9606 GN=RPL9 PE=1 SV=1	101.281
P52209	6-phosphogluconate dehydrogenase, decarboxylating OS=Homo sapiens OX=9606 GN=PGD PE=1 SV=3	32.2129
P24752	Acetyl-CoA acetyltransferase, mitochondrial OS=Homo sapiens OX=9606 GN=ACAT1 PE=1 SV=1	18.2255
P39687	Acidic leucine-rich nuclear phosphoprotein 32 family member A OS=Homo sapiens OX=9606 GN=ANP32A PE=1 SV=1	143.769
Q92688	Acidic leucine-rich nuclear phosphoprotein 32 family member B OS=Homo sapiens OX=9606 GN=ANP32B PE=1 SV=1	354.826
Q9BTT0	Acidic leucine-rich nuclear phosphoprotein 32 family member E OS=Homo sapiens OX=9606 GN=ANP32E PE=1 SV=1	64.4158
P63261;O18499;O18500;O42161;P02570;P02571;P02572;P04829;P07837;P10983;P10984;P10986;P10987;P12714;P14227;P15475;P17304;P18600;P18601;P18603;P29751;P30162;P30163;P41340;P48975;P49128;P53456;P53471;P53478;P53484;P53485;P53486;P53505;P53506;P60709;P90689;Q00214;Q00215;Q03342;Q25010;Q25472;Q27250;Q92193;Q93129	Actin, cytoplasmic 2 OS=Homo sapiens OX=9606 GN=ACTG1 PE=1 SV=1	31125.1
O15143	Actin-related protein 2/3 complex subunit 1B OS=Homo sapiens OX=9606 GN=ARPC1B PE=1 SV=3	12.7129
P61158	Actin-related protein 3 OS=Homo sapiens OX=9606 GN=ACTR3 PE=1 SV=3	138.906
P07108	Acyl-CoA-binding protein OS=Homo sapiens OX=9606 GN=DBI PE=1 SV=2	217.585
Q6P587	Acylpyruvase FAHD1, mitochondrial OS=Homo sapiens OX=9606 GN=FAHD1 PE=1 SV=2	26.5941
P07741	Adenine phosphoribosyltransferase OS=Homo sapiens OX=9606 GN=APRT PE=1 SV=2	255.206
P23526	Adenosylhomocysteinase OS=Homo sapiens OX=9606 GN=AHCY PE=1 SV=4	150.889
Q9HDC9	Adipocyte plasma membrane-associated protein OS=Homo sapiens OX=9606 GN=APMAP PE=1 SV=2	125.422
P05141	ADP/ATP translocase 2 OS=Homo sapiens OX=9606 GN=SLC25A5 PE=1 SV=7	2411.35
P12236	ADP/ATP translocase 3 OS=Homo sapiens OX=9606 GN=SLC25A6 PE=1 SV=4	743.944
Q9H0C2	ADP/ATP translocase 4 OS=Homo sapiens OX=9606 GN=SLC25A31 PE=2 SV=1	23.926
P61204;P84077	ADP-ribosylation factor 3 OS=Homo sapiens OX=9606 GN=ARF3 PE=1 SV=2	201.836
P47895	Aldehyde dehydrogenase family 1 member A3 OS=Homo sapiens OX=9606 GN=ALDH1A3 PE=1 SV=2	229.135
P01011	Alpha-1-antichymotrypsin OS=Homo sapiens OX=9606 GN=SERPINA3 PE=1 SV=2	16.7803
P12814	Alpha-actinin-1 OS=Homo sapiens OX=9606 GN=ACTN1 PE=1 SV=2	397.903
P35609	Alpha-actinin-2 OS=Homo sapiens OX=9606 GN=ACTN2 PE=1 SV=1	43.0404
O43707	Alpha-actinin-4 OS=Homo sapiens OX=9606 GN=ACTN4 PE=1 SV=2	221.489
P06733;O02654;P07322;P07323;P08734;P09104;P13929;P17182;P17183;P19140;P21550;P25704;P42897;P51913;Q27727;Q27877;Q9PVK2;Q9W7L0;Q9W7L1;Q9W7L2	Alpha-enolase OS=Homo sapiens OX=9606 GN=ENO1 PE=1 SV=2	6745.99
P04083	Annexin A1 OS=Homo sapiens OX=9606 GN=ANXA1 PE=1 SV=2	99.1003
P07355	Annexin A2 OS=Homo sapiens OX=9606 GN=ANXA2 PE=1 SV=2	133.084
P00966	Argininosuccinate synthase OS=Homo sapiens OX=9606 GN=ASS1 PE=1 SV=2	82.2866
P00505	Aspartate aminotransferase, mitochondrial OS=Homo sapiens OX=9606 GN=GOT2 PE=1 SV=3	660.746
P14868	Aspartate--tRNA ligase, cytoplasmic OS=Homo sapiens OX=9606 GN=DARS PE=1 SV=2	49.4525
P24539	ATP synthase F(0) complex subunit B1, mitochondrial OS=Homo sapiens OX=9606 GN=ATP5PB PE=1 SV=2	44.8463
P25705;P19483	ATP synthase subunit alpha, mitochondrial OS=Homo sapiens OX=9606 GN=ATP5F1A PE=1 SV=1	2274.03
P06576	ATP synthase subunit beta, mitochondrial OS=Homo sapiens OX=9606 GN=ATP5F1B PE=1 SV=3	4113.69
Q08211	ATP-dependent RNA helicase A OS=Homo sapiens OX=9606 GN=DHX9 PE=1 SV=4	265.863
Q92499	ATP-dependent RNA helicase DDX1 OS=Homo sapiens OX=9606 GN=DDX1 PE=1 SV=2	176.658
P07814	Bifunctional glutamate/proline--tRNA ligase OS=Homo sapiens OX=9606 GN=EPRS PE=1 SV=5	60.7754
P31939	Bifunctional purine biosynthesis protein PURH OS=Homo sapiens OX=9606 GN=ATIC PE=1 SV=3	309.209
P12830	Cadherin-1 OS=Homo sapiens OX=9606 GN=CDH1 PE=1 SV=3	102.146
Q96S95	Calcium/calmodulin-dependent protein kinase II inhibitor 2 OS=Homo sapiens OX=9606 GN=CAMK2N2 PE=2 SV=1	28.9533
P0DP25;P0DP23;P0DP24	Calmodulin-3 OS=Homo sapiens OX=9606 GN=CALM3 PE=1 SV=1	1133.76
O43852	Calumenin OS=Homo sapiens OX=9606 GN=CALU PE=1 SV=2	8.3605
P04040	Catalase OS=Homo sapiens OX=9606 GN=CAT PE=1 SV=3	42.5382
P21964	Catechol O-methyltransferase OS=Homo sapiens OX=9606 GN=COMT PE=1 SV=2	88.5184
P35221;P26231	Catenin alpha-1 OS=Homo sapiens OX=9606 GN=CTNNA1 PE=1 SV=1	280.649
O60716	Catenin delta-1 OS=Homo sapiens OX=9606 GN=CTNND1 PE=1 SV=1	179.366
P07339	Cathepsin D OS=Homo sapiens OX=9606 GN=CTSD PE=1 SV=1	5069.35
P16070	CD44 antigen OS=Homo sapiens OX=9606 GN=CD44 PE=1 SV=3	27.6911
Q8IX12	Cell division cycle and apoptosis regulator protein 1 OS=Homo sapiens OX=9606 GN=CCAR1 PE=1 SV=2	16.7135
Q9HC52	Chromobox protein homolog 8 OS=Homo sapiens OX=9606 GN=CBX8 PE=1 SV=3	34.933
O75390	Citrate synthase, mitochondrial OS=Homo sapiens OX=9606 GN=CS PE=1 SV=2	534.587
Q00610	Clathrin heavy chain 1 OS=Homo sapiens OX=9606 GN=CLTC PE=1 SV=5	1884.9
Q96KA5	Cleft lip and palate transmembrane protein 1-like protein OS=Homo sapiens OX=9606 GN=CLPTM1L PE=1 SV=1	5.13017
Q14019	Coactosin-like protein OS=Homo sapiens OX=9606 GN=COTL1 PE=1 SV=3	8.04146
P23528	Cofilin-1 OS=Homo sapiens OX=9606 GN=CFL1 PE=1 SV=3	2251.22
Q8IYT3	Coiled-coil domain-containing protein 170 OS=Homo sapiens OX=9606 GN=CCDC170 PE=1 SV=3	36.7984
Q9H9Q2	COP9 signalosome complex subunit 7b OS=Homo sapiens OX=9606 GN=COPS7B PE=1 SV=1	90.1601
O75367	Core histone macro-H2A.1 OS=Homo sapiens OX=9606 GN=H2AFY PE=1 SV=4	407.935
Q9P0M6	Core histone macro-H2A.2 OS=Homo sapiens OX=9606 GN=H2AFY2 PE=1 SV=3	44.4194
P04080	Cystatin-B OS=Homo sapiens OX=9606 GN=CSTB PE=1 SV=2	59.6007
Q9H8E8	Cysteine-rich protein 2-binding protein OS=Homo sapiens OX=9606 GN=KAT14 PE=1 SV=3	11.9537
Q7L1T6	Cytochrome b5 reductase 4 OS=Homo sapiens OX=9606 GN=CYB5R4 PE=1 SV=1	30.718
O43169	Cytochrome b5 type B OS=Homo sapiens OX=9606 GN=CYB5B PE=1 SV=3	58.0521
P07919	Cytochrome b-c1 complex subunit 6, mitochondrial OS=Homo sapiens OX=9606 GN=UQCRH PE=1 SV=2	69.853
P13073	Cytochrome c oxidase subunit 4 isoform 1, mitochondrial OS=Homo sapiens OX=9606 GN=COX4I1 PE=1 SV=1	164.588
Q07065	Cytoskeleton-associated protein 4 OS=Homo sapiens OX=9606 GN=CKAP4 PE=1 SV=2	21.7796
Q8NEM8	Cytosolic carboxypeptidase 3 OS=Homo sapiens OX=9606 GN=AGBL3 PE=2 SV=2	24.9976
Q96KP4	Cytosolic non-specific dipeptidase OS=Homo sapiens OX=9606 GN=CNDP2 PE=1 SV=2	32.5837
O43175	D-3-phosphoglycerate dehydrogenase OS=Homo sapiens OX=9606 GN=PHGDH PE=1 SV=4	171.249
Q14566	DNA replication licensing factor MCM6 OS=Homo sapiens OX=9606 GN=MCM6 PE=1 SV=1	62.1999
P33993	DNA replication licensing factor MCM7 OS=Homo sapiens OX=9606 GN=MCM7 PE=1 SV=4	138.609
P27695	DNA-(apurinic or apyrimidinic site) lyase OS=Homo sapiens OX=9606 GN=APEX1 PE=1 SV=2	15.7134
P78527	DNA-dependent protein kinase catalytic subunit OS=Homo sapiens OX=9606 GN=PRKDC PE=1 SV=3	67.9823
Q99543	DnaJ homolog subfamily C member 2 OS=Homo sapiens OX=9606 GN=DNAJC2 PE=1 SV=4	1.8814
P04844	Dolichyl-diphosphooligosaccharide--protein glycosyltransferase subunit 2 OS=Homo sapiens OX=9606 GN=RPN2 PE=1 SV=3	367.779
P63167	Dynein light chain 1, cytoplasmic OS=Homo sapiens OX=9606 GN=DYNLL1 PE=1 SV=1	38.8749
Q96FJ2	Dynein light chain 2, cytoplasmic OS=Homo sapiens OX=9606 GN=DYNLL2 PE=1 SV=1	46.1336
P53804	E3 ubiquitin-protein ligase TTC3 OS=Homo sapiens OX=9606 GN=TTC3 PE=1 SV=2	31.3902
P13804	Electron transfer flavoprotein subunit alpha, mitochondrial OS=Homo sapiens OX=9606 GN=ETFA PE=1 SV=1	69.8315
Q05639	Elongation factor 1-alpha 2 OS=Homo sapiens OX=9606 GN=EEF1A2 PE=1 SV=1	630.295
P29692	Elongation factor 1-delta OS=Homo sapiens OX=9606 GN=EEF1D PE=1 SV=5	76.6683
P26641	Elongation factor 1-gamma OS=Homo sapiens OX=9606 GN=EEF1G PE=1 SV=3	139.372
P13639;P05086;P05197;P09445;P58252;Q90705	Elongation factor 2 OS=Homo sapiens OX=9606 GN=EEF2 PE=1 SV=4	865.769
P49411	Elongation factor Tu, mitochondrial OS=Homo sapiens OX=9606 GN=TUFM PE=1 SV=2	254.309
P11021	Endoplasmic reticulum chaperone BiP OS=Homo sapiens OX=9606 GN=HSPA5 PE=1 SV=2	2130.47
P30040	Endoplasmic reticulum resident protein 29 OS=Homo sapiens OX=9606 GN=ERP29 PE=1 SV=4	65.9888
P14625	Endoplasmin OS=Homo sapiens OX=9606 GN=HSP90B1 PE=1 SV=1	2221.49
P42126	Enoyl-CoA delta isomerase 1, mitochondrial OS=Homo sapiens OX=9606 GN=ECI1 PE=1 SV=1	238.245
P07099	Epoxide hydrolase 1 OS=Homo sapiens OX=9606 GN=EPHX1 PE=1 SV=1	149.579
O94905	Erlin-2 OS=Homo sapiens OX=9606 GN=ERLIN2 PE=1 SV=1	35.5683
Q96HE7	ERO1-like protein alpha OS=Homo sapiens OX=9606 GN=ERO1A PE=1 SV=2	59.5366
P60842	Eukaryotic initiation factor 4A-I OS=Homo sapiens OX=9606 GN=EIF4A1 PE=1 SV=1	413.84
P15170	Eukaryotic peptide chain release factor GTP-binding subunit ERF3A OS=Homo sapiens OX=9606 GN=GSPT1 PE=1 SV=1	48.7081
P05198	Eukaryotic translation initiation factor 2 subunit 1 OS=Homo sapiens OX=9606 GN=EIF2S1 PE=1 SV=3	20.8968
P41091;Q2VIR3	Eukaryotic translation initiation factor 2 subunit 3 OS=Homo sapiens OX=9606 GN=EIF2S3 PE=1 SV=3	87.9359
P23588	Eukaryotic translation initiation factor 4B OS=Homo sapiens OX=9606 GN=EIF4B PE=1 SV=2	54.5359
P52907	F-actin-capping protein subunit alpha-1 OS=Homo sapiens OX=9606 GN=CAPZA1 PE=1 SV=3	314.527
Q96I24	Far upstream element-binding protein 3 OS=Homo sapiens OX=9606 GN=FUBP3 PE=1 SV=2	103.274
P49327	Fatty acid synthase OS=Homo sapiens OX=9606 GN=FASN PE=1 SV=3	2097.95
Q6PIW4	Fidgetin-like protein 1 OS=Homo sapiens OX=9606 GN=FIGNL1 PE=1 SV=2	2.6078
P21333	Filamin-A OS=Homo sapiens OX=9606 GN=FLNA PE=1 SV=4	7530
O75369	Filamin-B OS=Homo sapiens OX=9606 GN=FLNB PE=1 SV=2	481.832
Q14315	Filamin-C OS=Homo sapiens OX=9606 GN=FLNC PE=1 SV=3	118.959
P09467;O00757	Fructose-1,6-bisphosphatase 1 OS=Homo sapiens OX=9606 GN=FBP1 PE=1 SV=5	670.79
P09972	Fructose-bisphosphate aldolase C OS=Homo sapiens OX=9606 GN=ALDOC PE=1 SV=2	23.2529
P07954	Fumarate hydratase, mitochondrial OS=Homo sapiens OX=9606 GN=FH PE=1 SV=3	28.7331
Q9NWQ4	G patch domain-containing protein 2-like OS=Homo sapiens OX=9606 GN=GPATCH2L PE=1 SV=3	1.34782
P09382	Galectin-1 OS=Homo sapiens OX=9606 GN=LGALS1 PE=1 SV=2	210.863
Q08380	Galectin-3-binding protein OS=Homo sapiens OX=9606 GN=LGALS3BP PE=1 SV=1	1.14186
Q9BSJ2	Gamma-tubulin complex component 2 OS=Homo sapiens OX=9606 GN=TUBGCP2 PE=1 SV=2	315.91
P11413	Glucose-6-phosphate 1-dehydrogenase OS=Homo sapiens OX=9606 GN=G6PD PE=1 SV=4	3194.51
P06744	Glucose-6-phosphate isomerase OS=Homo sapiens OX=9606 GN=GPI PE=1 SV=4	560.894
P14314	Glucosidase 2 subunit beta OS=Homo sapiens OX=9606 GN=PRKCSH PE=1 SV=2	495.483
P00367	Glutamate dehydrogenase 1, mitochondrial OS=Homo sapiens OX=9606 GN=GLUD1 PE=1 SV=2	99.2414
A0A0B4J2D5;P0DPI2	Glutamine amidotransferase-like class 1 domain-containing protein 3B, mitochondrial OS=Homo sapiens OX=9606 GN=GATD3B PE=1 SV=1	177.155
P04406;O57672;P04797;P08735;P10096;P16858;P17244;P46406;P51640;Q28554	Glyceraldehyde-3-phosphate dehydrogenase OS=Homo sapiens OX=9606 GN=GAPDH PE=1 SV=3	5010.61
P43304	Glycerol-3-phosphate dehydrogenase, mitochondrial OS=Homo sapiens OX=9606 GN=GPD2 PE=1 SV=3	352.365
Q14451	Growth factor receptor-bound protein 7 OS=Homo sapiens OX=9606 GN=GRB7 PE=1 SV=2	96.033
Q9HAV7	GrpE protein homolog 1, mitochondrial OS=Homo sapiens OX=9606 GN=GRPEL1 PE=1 SV=2	54.687
P0DMV9;P0DMV8	Heat shock 70 kDa protein 1B OS=Homo sapiens OX=9606 GN=HSPA1B PE=1 SV=1	1078.53
P34931;P02827;P08106;P16627;P55063;Q28222;Q61696;Q91291	Heat shock 70 kDa protein 1-like OS=Homo sapiens OX=9606 GN=HSPA1L PE=1 SV=2	21.0215
P11142;P08108;P08109;P11503;P19120;P19378;P27541;Q06248;Q90473	Heat shock cognate 71 kDa protein OS=Homo sapiens OX=9606 GN=HSPA8 PE=1 SV=1	2704.23
Q12931	Heat shock protein 75 kDa, mitochondrial OS=Homo sapiens OX=9606 GN=TRAP1 PE=1 SV=3	172.999
P04792	Heat shock protein beta-1 OS=Homo sapiens OX=9606 GN=HSPB1 PE=1 SV=2	2887.53
P07900;Q14568;Q58FF6;Q58FG1	Heat shock protein HSP 90-alpha OS=Homo sapiens OX=9606 GN=HSP90AA1 PE=1 SV=5	2288.7
P08238;Q58FF7	Heat shock protein HSP 90-beta OS=Homo sapiens OX=9606 GN=HSP90AB1 PE=1 SV=4	4644.46
P51858	Hepatoma-derived growth factor OS=Homo sapiens OX=9606 GN=HDGF PE=1 SV=1	181.284
P09651;Q32P51	Heterogeneous nuclear ribonucleoprotein A1 OS=Homo sapiens OX=9606 GN=HNRNPA1 PE=1 SV=5	2070.25
P51991	Heterogeneous nuclear ribonucleoprotein A3 OS=Homo sapiens OX=9606 GN=HNRNPA3 PE=1 SV=2	642.035
Q14103	Heterogeneous nuclear ribonucleoprotein D0 OS=Homo sapiens OX=9606 GN=HNRNPD PE=1 SV=1	346.05
P31943	Heterogeneous nuclear ribonucleoprotein H OS=Homo sapiens OX=9606 GN=HNRNPH1 PE=1 SV=4	39.3799
P61978	Heterogeneous nuclear ribonucleoprotein K OS=Homo sapiens OX=9606 GN=HNRNPK PE=1 SV=1	575.978
P52272	Heterogeneous nuclear ribonucleoprotein M OS=Homo sapiens OX=9606 GN=HNRNPM PE=1 SV=3	1228.91
O60506	Heterogeneous nuclear ribonucleoprotein Q OS=Homo sapiens OX=9606 GN=SYNCRIP PE=1 SV=2	323.451
O43390	Heterogeneous nuclear ribonucleoprotein R OS=Homo sapiens OX=9606 GN=HNRNPR PE=1 SV=1	243.491
Q00839	Heterogeneous nuclear ribonucleoprotein U OS=Homo sapiens OX=9606 GN=HNRNPU PE=1 SV=6	1257.42
Q9BUJ2	Heterogeneous nuclear ribonucleoprotein U-like protein 1 OS=Homo sapiens OX=9606 GN=HNRNPUL1 PE=1 SV=2	196.108
Q1KMD3	Heterogeneous nuclear ribonucleoprotein U-like protein 2 OS=Homo sapiens OX=9606 GN=HNRNPUL2 PE=1 SV=1	241.127
P09429;B2RPK0	High mobility group protein B1 OS=Homo sapiens OX=9606 GN=HMGB1 PE=1 SV=3	935.832
P26583	High mobility group protein B2 OS=Homo sapiens OX=9606 GN=HMGB2 PE=1 SV=2	473.679
Q13547	Histone deacetylase 1 OS=Homo sapiens OX=9606 GN=HDAC1 PE=1 SV=1	23.3046
Q92769	Histone deacetylase 2 OS=Homo sapiens OX=9606 GN=HDAC2 PE=1 SV=2	51.698
P16403;P10412;P16402	Histone H1.2 OS=Homo sapiens OX=9606 GN=HIST1H1C PE=1 SV=2	54.594
Q71UI9;P0C0S5	Histone H2A.V OS=Homo sapiens OX=9606 GN=H2AFV PE=1 SV=3	448.224
Q5QNW6;O60814;P02278;P02279;P02282;P06900;P10853;P10854;P14001;P35067;P57053;P58876;P62807;Q00715;Q93078;Q93079;Q93080;Q99877;Q99879;Q99880	Histone H2B type 2-F OS=Homo sapiens OX=9606 GN=HIST2H2BF PE=1 SV=3	254.797
P68431;Q16695;Q6NXT2;Q71DI3	Histone H3.1 OS=Homo sapiens OX=9606 GN=HIST1H3A PE=1 SV=2	58.361
P84243	Histone H3.3 OS=Homo sapiens OX=9606 GN=H3F3A PE=1 SV=2	277.852
P62805;P02304;P02306;P02307;P02308;P02310;P02311;P04915;P08436;P35057;P35059;P40287;P50566;Q27443	Histone H4 OS=Homo sapiens OX=9606 GN=HIST1H4A PE=1 SV=2	6128.96
Q6YN16	Hydroxysteroid dehydrogenase-like protein 2 OS=Homo sapiens OX=9606 GN=HSDL2 PE=1 SV=1	238.508
P09529	Inhibin beta B chain OS=Homo sapiens OX=9606 GN=INHBB PE=1 SV=2	6.65822
Q15181	Inorganic pyrophosphatase OS=Homo sapiens OX=9606 GN=PPA1 PE=1 SV=2	487.564
P17301	Integrin alpha-2 OS=Homo sapiens OX=9606 GN=ITGA2 PE=1 SV=1	54.8037
P53708	Integrin alpha-8 OS=Homo sapiens OX=9606 GN=ITGA8 PE=1 SV=3	109.353
P05556	Integrin beta-1 OS=Homo sapiens OX=9606 GN=ITGB1 PE=1 SV=2	26.6544
P05362	Intercellular adhesion molecule 1 OS=Homo sapiens OX=9606 GN=ICAM1 PE=1 SV=2	1.06025
Q12906	Interleukin enhancer-binding factor 3 OS=Homo sapiens OX=9606 GN=ILF3 PE=1 SV=3	279.957
Q8TAD2	Interleukin-17D OS=Homo sapiens OX=9606 GN=IL17D PE=2 SV=1	83.4131
Q05084	Islet cell autoantigen 1 OS=Homo sapiens OX=9606 GN=ICA1 PE=1 SV=2	16.3988
P48735	Isocitrate dehydrogenase [NADP], mitochondrial OS=Homo sapiens OX=9606 GN=IDH2 PE=1 SV=2	2499.87
P14923	Junction plakoglobin OS=Homo sapiens OX=9606 GN=JUP PE=1 SV=3	8.66205
P19012	Keratin, type I cytoskeletal 15 OS=Homo sapiens OX=9606 GN=KRT15 PE=1 SV=3	102.753
P05783;P05784	Keratin, type I cytoskeletal 18 OS=Homo sapiens OX=9606 GN=KRT18 PE=1 SV=2	400.278
P04259;P02538;P48668	Keratin, type II cytoskeletal 6B OS=Homo sapiens OX=9606 GN=KRT6B PE=1 SV=5	11.218
P08729	Keratin, type II cytoskeletal 7 OS=Homo sapiens OX=9606 GN=KRT7 PE=1 SV=5	88.3665
P05787	Keratin, type II cytoskeletal 8 OS=Homo sapiens OX=9606 GN=KRT8 PE=1 SV=7	674.947
Q07666	KH domain-containing, RNA-binding, signal transduction-associated protein 1 OS=Homo sapiens OX=9606 GN=KHDRBS1 PE=1 SV=1	174.1
O43278	Kunitz-type protease inhibitor 1 OS=Homo sapiens OX=9606 GN=SPINT1 PE=1 SV=2	2.83694
Q16719	Kynureninase OS=Homo sapiens OX=9606 GN=KYNU PE=1 SV=1	136.901
P42166	Lamina-associated polypeptide 2, isoform alpha OS=Homo sapiens OX=9606 GN=TMPO PE=1 SV=2	32.6825
P42167	Lamina-associated polypeptide 2, isoforms beta/gamma OS=Homo sapiens OX=9606 GN=TMPO PE=1 SV=2	36.3948
P24043	Laminin subunit alpha-2 OS=Homo sapiens OX=9606 GN=LAMA2 PE=1 SV=4	222.422
Q14847	LIM and SH3 domain protein 1 OS=Homo sapiens OX=9606 GN=LASP1 PE=1 SV=2	33.8499
P11182	Lipoamide acyltransferase component of branched-chain alpha-keto acid dehydrogenase complex, mitochondrial OS=Homo sapiens OX=9606 GN=DBT PE=1 SV=3	44.5373
P23141;Q9UKY3	Liver carboxylesterase 1 OS=Homo sapiens OX=9606 GN=CES1 PE=1 SV=2	994.481
P00338;Q9BE24	L-lactate dehydrogenase A chain OS=Homo sapiens OX=9606 GN=LDHA PE=1 SV=2	766.216
P36776	Lon protease homolog, mitochondrial OS=Homo sapiens OX=9606 GN=LONP1 PE=1 SV=2	27.8718
P10619	Lysosomal protective protein OS=Homo sapiens OX=9606 GN=CTSA PE=1 SV=2	82.2054
Q9NZW5	MAGUK p55 subfamily member 6 OS=Homo sapiens OX=9606 GN=MPP6 PE=1 SV=2	1.62633
P40926	Malate dehydrogenase, mitochondrial OS=Homo sapiens OX=9606 GN=MDH2 PE=1 SV=3	1084.64
Q96LB2	Mas-related G-protein coupled receptor member X1 OS=Homo sapiens OX=9606 GN=MRGPRX1 PE=1 SV=1	178.298
P16035	Metalloproteinase inhibitor 2 OS=Homo sapiens OX=9606 GN=TIMP2 PE=1 SV=2	2.3194
P51608	Methyl-CpG-binding protein 2 OS=Homo sapiens OX=9606 GN=MECP2 PE=1 SV=1	147.347
Q96RQ3	Methylcrotonoyl-CoA carboxylase subunit alpha, mitochondrial OS=Homo sapiens OX=9606 GN=MCCC1 PE=1 SV=3	11.4137
P27816	Microtubule-associated protein 4 OS=Homo sapiens OX=9606 GN=MAP4 PE=1 SV=3	599.238
Q96B49	Mitochondrial import receptor subunit TOM6 homolog OS=Homo sapiens OX=9606 GN=TOMM6 PE=1 SV=1	52.7295
O94826	Mitochondrial import receptor subunit TOM70 OS=Homo sapiens OX=9606 GN=TOMM70 PE=1 SV=1	19.5949
P80192	Mitogen-activated protein kinase kinase kinase 9 OS=Homo sapiens OX=9606 GN=MAP3K9 PE=1 SV=3	49.3831
P26038	Moesin OS=Homo sapiens OX=9606 GN=MSN PE=1 SV=3	55.9605
Q9NZM1	Myoferlin OS=Homo sapiens OX=9606 GN=MYOF PE=1 SV=1	135.021
P60660	Myosin light polypeptide 6 OS=Homo sapiens OX=9606 GN=MYL6 PE=1 SV=2	231.268
P35580	Myosin-10 OS=Homo sapiens OX=9606 GN=MYH10 PE=1 SV=3	8.31532
P35579;P14105;Q62812	Myosin-9 OS=Homo sapiens OX=9606 GN=MYH9 PE=1 SV=4	1225.72
O14745	Na(+)/H(+) exchange regulatory cofactor NHE-RF1 OS=Homo sapiens OX=9606 GN=SLC9A3R1 PE=1 SV=4	117.037
P15559	NAD(P)H dehydrogenase [quinone] 1 OS=Homo sapiens OX=9606 GN=NQO1 PE=1 SV=1	778.023
P28331	NADH-ubiquinone oxidoreductase 75 kDa subunit, mitochondrial OS=Homo sapiens OX=9606 GN=NDUFS1 PE=1 SV=3	205.138
P41227	N-alpha-acetyltransferase 10 OS=Homo sapiens OX=9606 GN=NAA10 PE=1 SV=1	13.9546
Q15223	Nectin-1 OS=Homo sapiens OX=9606 GN=NECTIN1 PE=1 SV=3	11.5066
Q09666	Neuroblast differentiation-associated protein AHNAK OS=Homo sapiens OX=9606 GN=AHNAK PE=1 SV=2	791.032
Q8N0W4	Neuroligin-4, X-linked OS=Homo sapiens OX=9606 GN=NLGN4X PE=1 SV=1	32.4957
Q14697	Neutral alpha-glucosidase AB OS=Homo sapiens OX=9606 GN=GANAB PE=1 SV=3	2967.43
Q15758	Neutral amino acid transporter B(0) OS=Homo sapiens OX=9606 GN=SLC1A5 PE=1 SV=2	49.3858
P43490	Nicotinamide phosphoribosyltransferase OS=Homo sapiens OX=9606 GN=NAMPT PE=1 SV=1	210.166
Q9GZM8	Nuclear distribution protein nudE-like 1 OS=Homo sapiens OX=9606 GN=NDEL1 PE=1 SV=1	113.418
Q14980	Nuclear mitotic apparatus protein 1 OS=Homo sapiens OX=9606 GN=NUMA1 PE=1 SV=2	244.157
P67809	Nuclease-sensitive element-binding protein 1 OS=Homo sapiens OX=9606 GN=YBX1 PE=1 SV=3	1.49293
P19338	Nucleolin OS=Homo sapiens OX=9606 GN=NCL PE=1 SV=3	207.884
P15531	Nucleoside diphosphate kinase A OS=Homo sapiens OX=9606 GN=NME1 PE=1 SV=1	264.336
P22392	Nucleoside diphosphate kinase B OS=Homo sapiens OX=9606 GN=NME2 PE=1 SV=1	155.49
P55209	Nucleosome assembly protein 1-like 1 OS=Homo sapiens OX=9606 GN=NAP1L1 PE=1 SV=1	59.1164
Q5VT03	NUT family member 2D OS=Homo sapiens OX=9606 GN=NUTM2D PE=3 SV=2	16.0474
Q15645	Pachytene checkpoint protein 2 homolog OS=Homo sapiens OX=9606 GN=TRIP13 PE=1 SV=2	3.15499
P50897	Palmitoyl-protein thioesterase 1 OS=Homo sapiens OX=9606 GN=PPT1 PE=1 SV=1	75.1346
Q9ULN7	Paraneoplastic antigen-like protein 8B OS=Homo sapiens OX=9606 GN=PNMA8B PE=2 SV=4	14.9572
P62937	Peptidyl-prolyl cis-trans isomerase A OS=Homo sapiens OX=9606 GN=PPIA PE=1 SV=2	1800.35
Q00688	Peptidyl-prolyl cis-trans isomerase FKBP3 OS=Homo sapiens OX=9606 GN=FKBP3 PE=1 SV=1	66.8423
Q02790	Peptidyl-prolyl cis-trans isomerase FKBP4 OS=Homo sapiens OX=9606 GN=FKBP4 PE=1 SV=3	54.6862
P30044	Peroxiredoxin-5, mitochondrial OS=Homo sapiens OX=9606 GN=PRDX5 PE=1 SV=4	680.227
P30041	Peroxiredoxin-6 OS=Homo sapiens OX=9606 GN=PRDX6 PE=1 SV=3	547.547
P51659	Peroxisomal multifunctional enzyme type 2 OS=Homo sapiens OX=9606 GN=HSD17B4 PE=1 SV=3	281.059
P30086	Phosphatidylethanolamine-binding protein 1 OS=Homo sapiens OX=9606 GN=PEBP1 PE=1 SV=3	334.208
Q16822	Phosphoenolpyruvate carboxykinase [GTP], mitochondrial OS=Homo sapiens OX=9606 GN=PCK2 PE=1 SV=4	165.3
P00558	Phosphoglycerate kinase 1 OS=Homo sapiens OX=9606 GN=PGK1 PE=1 SV=3	2861.21
P18669;Q8N0Y7	Phosphoglycerate mutase 1 OS=Homo sapiens OX=9606 GN=PGAM1 PE=1 SV=2	659.301
Q16720	Plasma membrane calcium-transporting ATPase 3 OS=Homo sapiens OX=9606 GN=ATP2B3 PE=1 SV=3	11.5052
Q8NC51	Plasminogen activator inhibitor 1 RNA-binding protein OS=Homo sapiens OX=9606 GN=SERBP1 PE=1 SV=2	103.905
Q9H4M7	Pleckstrin homology domain-containing family A member 4 OS=Homo sapiens OX=9606 GN=PLEKHA4 PE=1 SV=2	3.78934
Q9UHX1	Poly(U)-binding-splicing factor PUF60 OS=Homo sapiens OX=9606 GN=PUF60 PE=1 SV=1	141.271
P0CG47;P0CG48;P62987	Polyubiquitin-B OS=Homo sapiens OX=9606 GN=UBB PE=1 SV=1	18.3241
A5A3E0	POTE ankyrin domain family member F OS=Homo sapiens OX=9606 GN=POTEF PE=1 SV=2	6.62005
Q00889	Pregnancy-specific beta-1-glycoprotein 6 OS=Homo sapiens OX=9606 GN=PSG6 PE=2 SV=1	56.4423
P07737	Profilin-1 OS=Homo sapiens OX=9606 GN=PFN1 PE=1 SV=2	1598.86
P35232	Prohibitin OS=Homo sapiens OX=9606 GN=PHB PE=1 SV=1	338.217
Q99623	Prohibitin-2 OS=Homo sapiens OX=9606 GN=PHB2 PE=1 SV=2	663.948
Q9UQ80	Proliferation-associated protein 2G4 OS=Homo sapiens OX=9606 GN=PA2G4 PE=1 SV=3	74.8763
P79522	Proline-rich protein 3 OS=Homo sapiens OX=9606 GN=PRR3 PE=1 SV=2	3.18307
P07602	Prosaposin OS=Homo sapiens OX=9606 GN=PSAP PE=1 SV=2	94.1933
Q9UL46	Proteasome activator complex subunit 2 OS=Homo sapiens OX=9606 GN=PSME2 PE=1 SV=4	223.319
P25788	Proteasome subunit alpha type-3 OS=Homo sapiens OX=9606 GN=PSMA3 PE=1 SV=2	69.4869
O14818;Q8TAA3	Proteasome subunit alpha type-7 OS=Homo sapiens OX=9606 GN=PSMA7 PE=1 SV=1	42.2336
P20618	Proteasome subunit beta type-1 OS=Homo sapiens OX=9606 GN=PSMB1 PE=1 SV=2	46.989
Q8NFV4	Protein ABHD11 OS=Homo sapiens OX=9606 GN=ABHD11 PE=1 SV=1	40.555
P30101	Protein disulfide-isomerase A3 OS=Homo sapiens OX=9606 GN=PDIA3 PE=1 SV=4	1979.22
P13667	Protein disulfide-isomerase A4 OS=Homo sapiens OX=9606 GN=PDIA4 PE=1 SV=2	316.2
Q15084	Protein disulfide-isomerase A6 OS=Homo sapiens OX=9606 GN=PDIA6 PE=1 SV=1	411.519
P07237	Protein disulfide-isomerase OS=Homo sapiens OX=9606 GN=P4HB PE=1 SV=3	2257.77
Q9P258	Protein RCC2 OS=Homo sapiens OX=9606 GN=RCC2 PE=1 SV=2	205.1
P31949;O60417;P24480;P50543;Q9UDP3	Protein S100-A11 OS=Homo sapiens OX=9606 GN=S100A11 PE=1 SV=2	171.267
Q86SG5;P31151	Protein S100-A7A OS=Homo sapiens OX=9606 GN=S100A7A PE=1 SV=3	11.2944
P05109	Protein S100-A8 OS=Homo sapiens OX=9606 GN=S100A8 PE=1 SV=1	394.611
P06702	Protein S100-A9 OS=Homo sapiens OX=9606 GN=S100A9 PE=1 SV=1	521.93
P25815	Protein S100-P OS=Homo sapiens OX=9606 GN=S100P PE=1 SV=2	16.5389
Q99497	Protein/nucleic acid deglycase DJ-1 OS=Homo sapiens OX=9606 GN=PARK7 PE=1 SV=2	135.567
Q9Y5H0	Protocadherin gamma-A3 OS=Homo sapiens OX=9606 GN=PCDHGA3 PE=2 SV=2	2.50752
Q9Y5G4	Protocadherin gamma-A9 OS=Homo sapiens OX=9606 GN=PCDHGA9 PE=2 SV=1	38.3211
Q5VTE0;P02993;P04720;P10126;P13549;P20001;P27706;Q90835	Putative elongation factor 1-alpha-like 3 OS=Homo sapiens OX=9606 GN=EEF1A1P5 PE=5 SV=1	42.0316
Q58FG0	Putative heat shock protein HSP 90-alpha A5 OS=Homo sapiens OX=9606 GN=HSP90AA5P PE=2 SV=1	127.312
P11498	Pyruvate carboxylase, mitochondrial OS=Homo sapiens OX=9606 GN=PC PE=1 SV=2	4.05547
P14618;O18919;P11974;P11979;P11980;P11981;P14786;P52480	Pyruvate kinase PKM OS=Homo sapiens OX=9606 GN=PKM PE=1 SV=4	7324.99
P50395	Rab GDP dissociation inhibitor beta OS=Homo sapiens OX=9606 GN=GDI2 PE=1 SV=2	590.52
P46940	Ras GTPase-activating-like protein IQGAP1 OS=Homo sapiens OX=9606 GN=IQGAP1 PE=1 SV=1	215.146
P62820;P61006	Ras-related protein Rab-1A OS=Homo sapiens OX=9606 GN=RAB1A PE=1 SV=3	11.7963
Q9H0U4	Ras-related protein Rab-1B OS=Homo sapiens OX=9606 GN=RAB1B PE=1 SV=1	148.305
A6NIZ1;P61224;P62834	Ras-related protein Rap-1b-like protein OS=Homo sapiens OX=9606 PE=2 SV=1	76.4508
P04626	Receptor tyrosine-protein kinase erbB-2 OS=Homo sapiens OX=9606 GN=ERBB2 PE=1 SV=1	332.993
P40938	Replication factor C subunit 3 OS=Homo sapiens OX=9606 GN=RFC3 PE=1 SV=2	5.92582
Q8NET4	Retrotransposon Gag-like protein 9 OS=Homo sapiens OX=9606 GN=RTL9 PE=1 SV=1	26.2297
O76021	Ribosomal L1 domain-containing protein 1 OS=Homo sapiens OX=9606 GN=RSL1D1 PE=1 SV=3	52.4847
Q96E39;P38159	RNA binding motif protein, X-linked-like-1 OS=Homo sapiens OX=9606 GN=RBMXL1 PE=1 SV=1	114.556
O75995	SAM and SH3 domain-containing protein 3 OS=Homo sapiens OX=9606 GN=SASH3 PE=1 SV=2	50.4429
P16615	Sarcoplasmic/endoplasmic reticulum calcium ATPase 2 OS=Homo sapiens OX=9606 GN=ATP2A2 PE=1 SV=1	319.957
Q8WVM8	Sec1 family domain-containing protein 1 OS=Homo sapiens OX=9606 GN=SCFD1 PE=1 SV=4	106.144
Q9NVA2	Septin-11 OS=Homo sapiens OX=9606 GN=SEPTIN11 PE=1 SV=3	46.2508
Q9UHD8	Septin-9 OS=Homo sapiens OX=9606 GN=SEPTIN9 PE=1 SV=2	5.51404
P34897	Serine hydroxymethyltransferase, mitochondrial OS=Homo sapiens OX=9606 GN=SHMT2 PE=1 SV=3	598.198
Q07955	Serine/arginine-rich splicing factor 1 OS=Homo sapiens OX=9606 GN=SRSF1 PE=1 SV=2	66.0872
P84103	Serine/arginine-rich splicing factor 3 OS=Homo sapiens OX=9606 GN=SRSF3 PE=1 SV=1	256.165
P30153	Serine/threonine-protein phosphatase 2A 65 kDa regulatory subunit A alpha isoform OS=Homo sapiens OX=9606 GN=PPP2R1A PE=1 SV=4	182.145
P62140	Serine/threonine-protein phosphatase PP1-beta catalytic subunit OS=Homo sapiens OX=9606 GN=PPP1CB PE=1 SV=3	85.8647
P29508	Serpin B3 OS=Homo sapiens OX=9606 GN=SERPINB3 PE=1 SV=2	4.11101
P48594	Serpin B4 OS=Homo sapiens OX=9606 GN=SERPINB4 PE=1 SV=2	13.9366
P50454	Serpin H1 OS=Homo sapiens OX=9606 GN=SERPINH1 PE=1 SV=2	289.958
Q96B97	SH3 domain-containing kinase-binding protein 1 OS=Homo sapiens OX=9606 GN=SH3KBP1 PE=1 SV=2	90.0783
O75911	Short-chain dehydrogenase/reductase 3 OS=Homo sapiens OX=9606 GN=DHRS3 PE=1 SV=2	2.20851
Q9UHB9	Signal recognition particle subunit SRP68 OS=Homo sapiens OX=9606 GN=SRP68 PE=1 SV=2	62.0067
Q9H7L9	Sin3 histone deacetylase corepressor complex component SDS3 OS=Homo sapiens OX=9606 GN=SUDS3 PE=1 SV=2	1776.78
Q04837	Single-stranded DNA-binding protein, mitochondrial OS=Homo sapiens OX=9606 GN=SSBP1 PE=1 SV=1	123.621
P63162;P14678	Small nuclear ribonucleoprotein-associated protein N OS=Homo sapiens OX=9606 GN=SNRPN PE=1 SV=1	129.786
P05023	Sodium/potassium-transporting ATPase subunit alpha-1 OS=Homo sapiens OX=9606 GN=ATP1A1 PE=1 SV=1	509.764
Q96R06	Sperm-associated antigen 5 OS=Homo sapiens OX=9606 GN=SPAG5 PE=1 SV=2	90.793
Q13838	Spliceosome RNA helicase DDX39B OS=Homo sapiens OX=9606 GN=DDX39B PE=1 SV=1	335.683
O75533	Splicing factor 3B subunit 1 OS=Homo sapiens OX=9606 GN=SF3B1 PE=1 SV=3	172.454
P26368	Splicing factor U2AF 65 kDa subunit OS=Homo sapiens OX=9606 GN=U2AF2 PE=1 SV=4	173.787
P23246	Splicing factor, proline- and glutamine-rich OS=Homo sapiens OX=9606 GN=SFPQ PE=1 SV=2	44.1964
Q8WXA9	Splicing regulatory glutamine/lysine-rich protein 1 OS=Homo sapiens OX=9606 GN=SREK1 PE=1 SV=1	345.543
Q7KZF4	Staphylococcal nuclease domain-containing protein 1 OS=Homo sapiens OX=9606 GN=SND1 PE=1 SV=1	80.4692
Q9Y365	START domain-containing protein 10 OS=Homo sapiens OX=9606 GN=STARD10 PE=1 SV=2	53.2692
P38646	Stress-70 protein, mitochondrial OS=Homo sapiens OX=9606 GN=HSPA9 PE=1 SV=2	1099.48
P31948	Stress-induced-phosphoprotein 1 OS=Homo sapiens OX=9606 GN=STIP1 PE=1 SV=1	309.786
Q96I99	Succinate--CoA ligase [GDP-forming] subunit beta, mitochondrial OS=Homo sapiens OX=9606 GN=SUCLG2 PE=1 SV=2	588.398
P51649	Succinate-semialdehyde dehydrogenase, mitochondrial OS=Homo sapiens OX=9606 GN=ALDH5A1 PE=1 SV=2	22.9855
Q9Y6N5	Sulfide:quinone oxidoreductase, mitochondrial OS=Homo sapiens OX=9606 GN=SQOR PE=1 SV=1	40.3304
O00445	Synaptotagmin-5 OS=Homo sapiens OX=9606 GN=SYT5 PE=1 SV=2	5.13323
Q16650	T-box brain protein 1 OS=Homo sapiens OX=9606 GN=TBR1 PE=1 SV=1	22.1688
P17987	T-complex protein 1 subunit alpha OS=Homo sapiens OX=9606 GN=TCP1 PE=1 SV=1	161.776
P78371	T-complex protein 1 subunit beta OS=Homo sapiens OX=9606 GN=CCT2 PE=1 SV=4	517.033
P50991	T-complex protein 1 subunit delta OS=Homo sapiens OX=9606 GN=CCT4 PE=1 SV=4	236.514
P48643	T-complex protein 1 subunit epsilon OS=Homo sapiens OX=9606 GN=CCT5 PE=1 SV=1	49.2279
P49368	T-complex protein 1 subunit gamma OS=Homo sapiens OX=9606 GN=CCT3 PE=1 SV=4	228.549
P50990	T-complex protein 1 subunit theta OS=Homo sapiens OX=9606 GN=CCT8 PE=1 SV=4	350.265
P40227	T-complex protein 1 subunit zeta OS=Homo sapiens OX=9606 GN=CCT6A PE=1 SV=3	79.4815
Q8NBS9	Thioredoxin domain-containing protein 5 OS=Homo sapiens OX=9606 GN=TXNDC5 PE=1 SV=2	74.9587
P30048	Thioredoxin-dependent peroxide reductase, mitochondrial OS=Homo sapiens OX=9606 GN=PRDX3 PE=1 SV=3	759.518
P62328	Thymosin beta-4 OS=Homo sapiens OX=9606 GN=TMSB4X PE=1 SV=2	368.153
P23193	Transcription elongation factor A protein 1 OS=Homo sapiens OX=9606 GN=TCEA1 PE=1 SV=2	29.4827
O00267	Transcription elongation factor SPT5 OS=Homo sapiens OX=9606 GN=SUPT5H PE=1 SV=1	20.4863
Q04725	Transducin-like enhancer protein 2 OS=Homo sapiens OX=9606 GN=TLE2 PE=1 SV=2	42.1452
P55072	Transitional endoplasmic reticulum ATPase OS=Homo sapiens OX=9606 GN=VCP PE=1 SV=4	413.947
P29401	Transketolase OS=Homo sapiens OX=9606 GN=TKT PE=1 SV=3	2321.84
P51571	Translocon-associated protein subunit delta OS=Homo sapiens OX=9606 GN=SSR4 PE=1 SV=1	25.7809
P49755	Transmembrane emp24 domain-containing protein 10 OS=Homo sapiens OX=9606 GN=TMED10 PE=1 SV=2	500.05
P40939	Trifunctional enzyme subunit alpha, mitochondrial OS=Homo sapiens OX=9606 GN=HADHA PE=1 SV=2	1410.34
P55084	Trifunctional enzyme subunit beta, mitochondrial OS=Homo sapiens OX=9606 GN=HADHB PE=1 SV=3	315.268
P60174	Triosephosphate isomerase OS=Homo sapiens OX=9606 GN=TPI1 PE=1 SV=3	2353.86
I1YAP6	Tripartite motif-containing protein 77 OS=Homo sapiens OX=9606 GN=TRIM77 PE=2 SV=2	10.4468
Q08J23	tRNA (cytosine(34)-C(5))-methyltransferase OS=Homo sapiens OX=9606 GN=NSUN2 PE=1 SV=2	99.3835
P06753	Tropomyosin alpha-3 chain OS=Homo sapiens OX=9606 GN=TPM3 PE=1 SV=2	16.568
P23381	Tryptophan--tRNA ligase, cytoplasmic OS=Homo sapiens OX=9606 GN=WARS PE=1 SV=2	199.312
Q9BQE3;Q9NY65	Tubulin alpha-1C chain OS=Homo sapiens OX=9606 GN=TUBA1C PE=1 SV=1	28.3357
P07437;A6NNZ2;Q13509	Tubulin beta chain OS=Homo sapiens OX=9606 GN=TUBB PE=1 SV=2	36.2712
Q9BVA1;Q13885;Q9BUF5	Tubulin beta-2B chain OS=Homo sapiens OX=9606 GN=TUBB2B PE=1 SV=1	48.9574
P68371;P04350;Q3ZCM7	Tubulin beta-4B chain OS=Homo sapiens OX=9606 GN=TUBB4B PE=1 SV=1	345.534
Q12792	Twinfilin-1 OS=Homo sapiens OX=9606 GN=TWF1 PE=1 SV=3	74.3957
Q86T03	Type 1 phosphatidylinositol 4,5-bisphosphate 4-phosphatase OS=Homo sapiens OX=9606 GN=PIP4P1 PE=1 SV=1	26.9565
Q96RU2	Ubiquitin carboxyl-terminal hydrolase 28 OS=Homo sapiens OX=9606 GN=USP28 PE=1 SV=1	130.007
P62068	Ubiquitin carboxyl-terminal hydrolase 46 OS=Homo sapiens OX=9606 GN=USP46 PE=1 SV=1	28.6496
P45974	Ubiquitin carboxyl-terminal hydrolase 5 OS=Homo sapiens OX=9606 GN=USP5 PE=1 SV=2	76.2923
P62979	Ubiquitin-40S ribosomal protein S27a OS=Homo sapiens OX=9606 GN=RPS27A PE=1 SV=2	106.397
P22314	Ubiquitin-like modifier-activating enzyme 1 OS=Homo sapiens OX=9606 GN=UBA1 PE=1 SV=3	365.523
O60701	UDP-glucose 6-dehydrogenase OS=Homo sapiens OX=9606 GN=UGDH PE=1 SV=1	16.6517
Q3C1V1	Uncharacterized protein C11orf91 OS=Homo sapiens OX=9606 GN=C11orf91 PE=2 SV=2	95.634
Q8IYS4	Uncharacterized protein C16orf71 OS=Homo sapiens OX=9606 GN=C16orf71 PE=2 SV=3	49.1111
Q16851	UTP--glucose-1-phosphate uridylyltransferase OS=Homo sapiens OX=9606 GN=UGP2 PE=1 SV=5	6.98332
O14975	Very long-chain acyl-CoA synthetase OS=Homo sapiens OX=9606 GN=SLC27A2 PE=1 SV=2	9.46499
P49748	Very long-chain specific acyl-CoA dehydrogenase, mitochondrial OS=Homo sapiens OX=9606 GN=ACADVL PE=1 SV=1	211.871
O75396	Vesicle-trafficking protein SEC22b OS=Homo sapiens OX=9606 GN=SEC22B PE=1 SV=4	47.9161
Q12907	Vesicular integral-membrane protein VIP36 OS=Homo sapiens OX=9606 GN=LMAN2 PE=1 SV=1	33.6306
P21796	Voltage-dependent anion-selective channel protein 1 OS=Homo sapiens OX=9606 GN=VDAC1 PE=1 SV=2	1139.69
P45880	Voltage-dependent anion-selective channel protein 2 OS=Homo sapiens OX=9606 GN=VDAC2 PE=1 SV=2	768.664
O75083	WD repeat-containing protein 1 OS=Homo sapiens OX=9606 GN=WDR1 PE=1 SV=4	139.081
P13010	X-ray repair cross-complementing protein 5 OS=Homo sapiens OX=9606 GN=XRCC5 PE=1 SV=3	342.058
P16989	Y-box-binding protein 3 OS=Homo sapiens OX=9606 GN=YBX3 PE=1 SV=4	87.4333
A6NP61	ZAR1-like protein OS=Homo sapiens OX=9606 GN=ZAR1L PE=2 SV=2	22.4044
Q8NAP3	Zinc finger and BTB domain-containing protein 38 OS=Homo sapiens OX=9606 GN=ZBTB38 PE=1 SV=2	5.82861
P17022	Zinc finger protein 18 OS=Homo sapiens OX=9606 GN=ZNF18 PE=1 SV=2	8.14201
Q15942	Zyxin OS=Homo sapiens OX=9606 GN=ZYX PE=1 SV=1	12.0342

## Sheet: 6 - HCC1954 ONLY DETECTED PTN
			SUPLEMENTARY TABLE 2F - HCC-1954 ONLY DETECTED PROTEINS
		[HCC1954 ME]:	Description	Gene name
		Q6UXS9	Inactive caspase-12	CASP12
		P62736;P63267	Actin, aortic smooth muscle	ACTA2
		Q13740	CD166 antigen	ALCAM
		P42677	40S ribosomal protein S27	RPS27
		[HCC1954 ME] and [HCC1954 FT]:	Description	Gene Name
		P68104	Elongation factor 1-alpha 1	EEF1A1
		Q15293	Reticulocalbin-1	RCN1
		P06756	Integrin alpha-V	ITGAV
		P13987	CD59 glycoprotein	CD59
		P12270	Nucleoprotein TPR	TPR
		P21980	Protein-glutamine gamma-glutamyltransferase 2	TGM2
		Q92928	Putative Ras-related protein Rab-1C	RAB1C
		Q5M9Q1	NKAP-like protein	NKAPL
		Q9HBI6	Cytochrome P450 4F11	CYP4F11
		[HCC1954 FT]:	Description	Gene name
		Q8NHS0	DnaJ homolog subfamily B member 8	DNAJB8
		Q13490	Baculoviral IAP repeat-containing protein 2	BIRC2
		P35712	Transcription factor SOX-6	SOX6
		Q7Z6R9	Transcription factor AP-2-delta	TFAP2D
		P12429	Annexin A3	ANXA3
		P55265	Double-stranded RNA-specific adenosine deaminase	ADAR
		Q9H8Y8	Golgi reassembly-stacking protein 2	GORASP2
		P09758	Tumor-associated calcium signal transducer 2	TACSTD2
		Q8N4B4	F-box only protein 39	FBXO39
		Q9UQ26	Regulating synaptic membrane exocytosis protein 2	RIMS2
		Q4FZB7	Histone-lysine N-methyltransferase KMT5B	KMT5B
		Q9BS26	Endoplasmic reticulum resident protein 44	ERP44
		P50552	Vasodilator-stimulated phosphoprotein	VASP
		P04181	Ornithine aminotransferase, mitochondrial	OAT
		P41273	Tumor necrosis factor ligand superfamily member 9	TNFSF9

## Sheet: 7 - HCC1954MEXMCF-7ME EXCLUDENT
										versus
					[HCC-1954 ME]:	67 proteins from venn diagram								[MCF-7 ME]:	32 proteins from venn diagram
					Accession	Gene name								Accession	Gene name
					P09972	ALDOC								P0DJG4	THEGL
					Q9HBI6	CYP4F11								O75531	BANF1
					P16989	YBX3								Q9UQR0	SCML2
					P06753	TPM3								Q16181	SEPTIN7
					Q8IYT3	CCDC170								P39748	FEN1
					P0DP25	CALM3								P22392	NME2
					P42677	RPS27								Q3C1V1	C11orf91
					Q5M9Q1	NKAPL								P15313	ATP6V1B1
					P16070	CD44								Q92900	UPF1
					Q92928	RAB1C								P51571	SSR4
					Q96I24	FUBP3								P62068	USP46
					P21980	TGM2								Q53GT1	KLHL22
					Q16650	TBR1								Q14103	HNRNPD
					Q13740	ALCAM								Q99584	S100A13
					O43278	SPINT1								P62854	RPS26
					I1YAP6	TRIM77								P31939	ATIC
					P12270	TPR								P16401	H1-5
					Q15942	ZYX								Q12931	TRAP1
					P04083	ANXA1								P46940	IQGAP1
					P13987	CD59								A6NIZ1	Ras-related protein Rap-1b-like protein
					O75911	DHRS3								Q96S95	CAMK2N2
					Q99714	HSD17B10								P00966	ASS1
					Q07065	CKAP4								Q96RU2	USP28
					O76021	RSL1D1								P04844	RPN2
					P18124	RPL7								P61158	ACTR3
					P24752	ACAT1								P25788	PSMA3
					P06756	ITGAV								Q9BVA1	TUBB2B
					Q9BTT0	ANP32E								Q02543	RPL18A
					O94826	TOMM70								Q14019	COTL1
					P84103	SRSF3								O75396	SEC22B
					P62736	ACTA2								P61204	ARF3
					Q9BRK5	SDF4								Q9HDC9	APMAP
					P45974	USP5
					Q96E39	RBMXL1
					Q6UXS9	CASP12
					P68371	TUBB4B
					P04259	KRT6B
					P61604	HSPE1
					P38646	HSPA9
					P28331	NDUFS1
					Q15293	RCN1
					Q16719	KYNU
					P30041	PRDX6
					P43304	GPD2
					Q04837	SSBP1
					Q9H0U4	RAB1B
					O43169	CYB5B
					Q9BQE3	TUBA1C
					P23396	RPS3
					P68104	EEF1A1
					P07108	DBI
					P62750	RPL23A
					P62424	RPL7A
					P25815	S100P
					P62906	RPL10A
					Q96KP4	CNDP2
					P62140	PPP1CB
					P55072	VCP
					Q9ULN7	PNMA8B
					Q07955	SRSF1
					P30040	ERP29
					P05388	RPLP0
					P13804	ETFA
					P07602	PSAP
					P48594	SERPINB4
					P62753	RPS6
					P05023	ATP1A1

## Sheet: 8 - MCF7 ONLY DETECTED PTN
			SUPLEMENTARY TABLE 2G - MCF-7 ONLY DETECTED PROTEINS
		[MCF7 ME]:	Description	Gene Name
		P16401	Histone H1.5	H1-5
		Q99584	Protein S100-A13	S100A13
		Q53GT1	Kelch-like protein 22	KLHL22
		Q92900	Regulator of nonsense transcripts 1	UPF1
		P15313	V-type proton ATPase subunit B, kidney isoform	ATP6V1B1
		P39748	Flap endonuclease 1	FEN1
		Q16181	Septin-7	2020-09-07
		Q9UQR0	Sex comb on midleg-like protein 2	SCML2
		O75531	Barrier-to-autointegration factor	BANF1
		P0DJG4	Testicular haploid expressed gene protein-like	THEGL
		[MCF7 ME] and [MCF7 FT]:	Description	Gene name
		A6NIZ1;P61224;P62834	Ras-related protein Rap-1b-like protein	RAP1B
		P62068	Ubiquitin carboxyl-terminal hydrolase 46	USP46
		[MCF7 FT]:	Description	Gene name
		O14975	Very long-chain acyl-CoA synthetase	SLC27A2
		P51649	Succinate-semialdehyde dehydrogenase, mitochondrial	ALDH5A1
		Q6P587	Acylpyruvase FAHD1, mitochondrial	FAHD1
		Q86T03	Type 1 phosphatidylinositol 4,5-bisphosphate 4-phosphatase	PIP4P1
		P36776	Lon protease homolog, mitochondrial	LONP1
		P23193	Transcription elongation factor A protein 1	TCEA1
		P63167	Dynein light chain 1, cytoplasmic	DYNLL1
		P09110	3-ketoacyl-CoA thiolase, peroxisomal	ACAA1
		P55209	Nucleosome assembly protein 1-like 1	NAP1L1
		P62701	40S ribosomal protein S4, X isoform	RPS4X
		Q9UHX1	Poly(U)-binding-splicing factor PUF60	PUF60
		O75533	Splicing factor 3B subunit 1	SF3B1
		P07741	Adenine phosphoribosyltransferase	APRT

## Sheet: 9 - Volcano plot ME
					SUPLEMENTARY TABLE 2H - VOLCANO PLOT SIGNIFICATIVE PROTEINS OF ME FRACTION
Significant	#REF!	Difference HCC1954 ME - MCF7 ME)	FC	Accession	Description	Gene name	GOBP name	GOMF name	GOCC name	Confidence score	Anova (p)	HCC1954 ME 1	HCC1954 ME 2	HCC1954 ME 3	HCC1954 ME 4	HCC1954 FT 1	HCC1954 FT 2	HCC1954 FT3	HCC1954 FT 4	MCF7 ME 1	MCF7 ME 2	MCF7 ME 3	MCF7 ME 4	MCF7 FT 1	MCF7 FT 2	MCF7 FT 3	MCF7 FT 4
+	7.20287	6.2349	75.3167	P08729	Keratin, type II cytoskeletal 7 OS=Homo sapiens OX=9606 GN=KRT7 PE=1 SV=5	KRT7	viral reproduction	structural molecule activity	cell part;cytoplasm;cytoskeletal part;extracellular membrane-bounded organelle;extracellular organelle;extracellular region part;extracellular vesicular exosome;intermediate filament;intracellular membrane-bounded organelle;intracellular organelle;intracellular organelle part;intracellular part;keratin filament;macromolecular complex;membrane-bounded organelle;membrane-bounded vesicle;nucleus;org…	75.6304	3.95e-06	824.445	980.236	877.561	865.651	380.2	457.809	130.138	260.092	10.8789	8.9161	12.0745	17.2747	247.755	52.5608	36.7088	16.4414
+	3.22795	5.78123	54.9949	P15531	Nucleoside diphosphate kinase A OS=Homo sapiens OX=9606 GN=NME1 PE=1 SV=1	NME1	anatomical structure development;biological regulation;biosynthetic process;carbohydrate homeostasis;cellular biosynthetic process;cellular chemical homeostasis;cellular component organization;cellular component organization or biogenesis;cellular glucose homeostasis;cellular homeostasis;cellular macromolecule metabolic process;cellular membrane organization;cellular metabolic process;cellular ni…	adenyl nucleotide binding;adenyl ribonucleotide binding;ATP binding;binding;catalytic activity;cation binding;deoxyribonuclease activity;DNA binding;GTP binding;guanyl nucleotide binding;guanyl ribonucleotide binding;hydrolase activity;hydrolase activity, acting on ester bonds;identical protein binding;ion binding;kinase activity;magnesium ion binding;metal ion binding;nuclease activity;nucleic a…	cell part;cell projection membrane;cell projection part;centrosome;cytoplasm;cytoplasmic part;cytoskeletal part;cytosol;extracellular membrane-bounded organelle;extracellular organelle;extracellular region part;extracellular vesicular exosome;intermediate filament;intracellular membrane-bounded organelle;intracellular non-membrane-bounded organelle;intracellular organelle;intracellular organelle …	59.6748	1.14e-05	198.894	216.511	171.733	170.017	26.5033	107.105	19.5087	91.5686	3.33503	6.41951	9.73157	0.699621	373.618	321.469	105.899	256.359
+	1.67465	5.78026	54.9581	Q7KZF4	Staphylococcal nuclease domain-containing protein 1 OS=Homo sapiens OX=9606 GN=SND1 PE=1 SV=1	SND1	biological regulation;biosynthetic process;cell differentiation;cellular biosynthetic process;cellular developmental process;cellular macromolecule biosynthetic process;cellular macromolecule metabolic process;cellular metabolic process;cellular nitrogen compound metabolic process;cellular process;developmental process;gene silencing;gene silencing by RNA;macromolecule biosynthetic process;macrom…	catalytic activity;hydrolase activity;hydrolase activity, acting on ester bonds;nuclease activity;protein binding transcription factor activity;transcription cofactor activity;transcription factor binding transcription factor activity	cell part;cytoplasm;cytoplasmic membrane-bounded vesicle;cytoplasmic part;cytoplasmic vesicle;extracellular membrane-bounded organelle;extracellular organelle;extracellular region part;extracellular vesicular exosome;intracellular membrane-bounded organelle;intracellular organelle;intracellular part;macromolecular complex;melanosome;membrane;membrane-bounded organelle;membrane-bounded vesicle;mit…	30.9796	0.0242302	0	174.815	324.109	253.87	59.4093	341.268	75.1065	318.537	1.33034	0	0.505051	2.88505	17.8239	17.932	1.67168	284.449
+	5.5802	5.69992	51.9812	Q15645	Pachytene checkpoint protein 2 homolog OS=Homo sapiens OX=9606 GN=TRIP13 PE=1 SV=2	TRIP13	anatomical structure development;biosynthetic process;cell cycle phase;cell cycle process;cell development;cell maturation;cellular biosynthetic process;cellular component assembly;cellular component assembly at cellular level;cellular component organization;cellular component organization at cellular level;cellular component organization or biogenesis;cellular component organization or biogenesi…	adenyl nucleotide binding;adenyl ribonucleotide binding;ATP binding;binding;identical protein binding;nucleotide binding;protein binding;protein binding transcription factor activity;purine nucleotide binding;purine ribonucleoside triphosphate binding;purine ribonucleotide binding;ribonucleotide binding;transcription cofactor activity;transcription factor binding transcription factor activity	cell part;germ cell nucleus;intracellular membrane-bounded organelle;intracellular organelle;intracellular part;male germ cell nucleus;membrane-bounded organelle;nucleus;organelle	5.402	0.00297221	49.8455	65.3347	52.8116	59.1808	42.0318	11.0565	0	36.1557	0.643361	0	1.04644	2.00927	10.7046	1.41981	0.495559	0
+	2.72546	5.45779	43.95	P61769	Beta-2-microglobulin OS=Homo sapiens OX=9606 GN=B2M PE=1 SV=1	B2M	anatomical structure homeostasis;antigen processing and presentation;antigen processing and presentation of exogenous antigen;antigen processing and presentation of exogenous peptide antigen;antigen processing and presentation of exogenous peptide antigen via MHC class I;antigen processing and presentation of exogenous peptide antigen via MHC class I, TAP-dependent;antigen processing and presenta…	binding;identical protein binding;protein binding	adherens junction;anchoring junction;cell junction;cell part;cell-substrate adherens junction;cell-substrate junction;coated vesicle membrane;cytoplasm;cytoplasmic part;cytoplasmic vesicle membrane;cytoplasmic vesicle part;early endosome lumen;early endosome membrane;endocytic vesicle membrane;endoplasmic reticulum lumen;endoplasmic reticulum part;endosomal part;endosome lumen;endosome membrane;E…	6.4824	7.27e-07	131.277	93.2283	131.139	125.298	0	0	0	0	7.59073	9.31421	0	0.478896	0	0	0	0
+	2.82105	5.43928	43.3896	P31949;O60417;P24480;P50543;Q9UDP3	Protein S100-A11 OS=Homo sapiens OX=9606 GN=S100A11 PE=1 SV=2	S100A11	biological regulation;cellular process;cellular response to stimulus;negative regulation of biological process;negative regulation of biosynthetic process;negative regulation of cell proliferation;negative regulation of cellular biosynthetic process;negative regulation of cellular macromolecule biosynthetic process;negative regulation of cellular metabolic process;negative regulation of cellular …	binding;calcium ion binding;calcium-dependent protein binding;cation binding;identical protein binding;ion binding;metal ion binding;protein binding;protein dimerization activity;protein homodimerization activity	cell part;cell projection;cytoplasm;extracellular membrane-bounded organelle;extracellular organelle;extracellular region part;extracellular space;extracellular vesicular exosome;intracellular membrane-bounded organelle;intracellular organelle;intracellular organelle part;intracellular part;membrane-bounded organelle;membrane-bounded vesicle;nuclear part;nucleoplasm;nucleus;organelle;organelle pa…	22.1962	1.8e-05	60.2582	11.452	108.652	65.0278	481.759	117.763	347.307	299.632	2.42281	0	0.295998	2.78101	48.1791	411.262	193.168	32.4599
+	2.89846	5.3906	41.9501	P17987	T-complex protein 1 subunit alpha OS=Homo sapiens OX=9606 GN=TCP1 PE=1 SV=1	TCP1	binding of sperm to zona pellucida;biological regulation;cell recognition;cell-cell recognition;cellular component assembly;cellular component assembly at cellular level;cellular component organization;cellular component organization at cellular level;cellular component organization or biogenesis;cellular component organization or biogenesis at cellular level;cellular macromolecular complex assem…	adenyl nucleotide binding;adenyl ribonucleotide binding;ATP binding;binding;enzyme binding;nucleotide binding;protein binding;purine nucleotide binding;purine ribonucleoside triphosphate binding;purine ribonucleotide binding;ribonucleotide binding;ubiquitin protein ligase binding;unfolded protein binding	acrosomal vesicle;cell body;cell part;centrosome;chaperonin-containing T-complex;chromatin;chromosomal part;cytoplasmic membrane-bounded vesicle;cytoplasmic part;cytoplasmic vesicle;cytoskeletal part;cytosol;cytosolic part;extracellular membrane-bounded organelle;extracellular organelle;extracellular region part;extracellular vesicular exosome;Golgi apparatus;heterochromatin;intracellular membran…	74.1585	0.000171687	178.862	180.118	180.824	180.896	28.0846	120.383	124.108	123.704	16.6451	0.878163	8.85884	2.78662	202.825	96.4749	307.553	40.25
+	3.41926	5.34772	40.7216	P18669;Q8N0Y7	Phosphoglycerate mutase 1 OS=Homo sapiens OX=9606 GN=PGAM1 PE=1 SV=2	PGAM1;PGAM4	alcohol biosynthetic process;alcohol catabolic process;alcohol metabolic process;biological regulation;biosynthetic process;carbohydrate biosynthetic process;carbohydrate catabolic process;carbohydrate metabolic process;catabolic process;cellular biosynthetic process;cellular carbohydrate biosynthetic process;cellular carbohydrate catabolic process;cellular carbohydrate metabolic process;cellular…	binding;bisphosphoglycerate 2-phosphatase activity;bisphosphoglycerate mutase activity;bisphosphoglycerate phosphatase activity;catalytic activity;enzyme binding;hydrolase activity;hydrolase activity, acting on ester bonds;intramolecular transferase activity;intramolecular transferase activity, phosphotransferases;isomerase activity;kinase binding;phosphatase activity;phosphoglycerate mutase acti…	cell part;cytoplasm;cytoplasmic part;cytosol;extracellular membrane-bounded organelle;extracellular organelle;extracellular region part;extracellular vesicular exosome;intracellular part;membrane;membrane-bounded organelle;membrane-bounded vesicle;organelle;vesicle	25.4007	2.56e-10	55.0321	28.719	40.3818	44.4375	120.38	345.387	294.957	473.52	0.341777	0	0.956126	0.871552	386.083	815.155	496.445	939.521
+	3.33265	5.24553	37.937	P12236	ADP/ATP translocase 3 OS=Homo sapiens OX=9606 GN=SLC25A6 PE=1 SV=4	SLC25A6	active induction of host immune response by virus;adenine nucleotide transport;ADP transport;apoptosis;ATP transport;biological regulation;cell death;cellular macromolecule metabolic process;cellular metabolic process;cellular process;cellular protein metabolic process;death;energy derivation by oxidation of organic compounds;energy reserve metabolic process;establishment of localization;establis…	active transmembrane transporter activity;antiporter activity;ATP:ADP antiporter activity;secondary active transmembrane transporter activity;solute:solute antiporter activity;transmembrane transporter activity;transporter activity	cell part;cytoplasmic part;integral to membrane;intracellular membrane-bounded organelle;intracellular organelle;intracellular organelle part;intracellular part;intrinsic to membrane;macromolecular complex;membrane;membrane part;membrane-bounded organelle;mitochondrial inner membrane;mitochondrial inner membrane presequence translocase complex;mitochondrial membrane;mitochondrial membrane part;mi…	91.2252	8.59e-07	56.4441	65.4166	121.863	87.0701	339.191	280.622	334.347	139.725	5.10776	4.70039	1.16262	0.718593	1627.38	665.906	138.794	543.692
+	5.745	5.10523	34.4213	Q7L1T6	Cytochrome b5 reductase 4 OS=Homo sapiens OX=9606 GN=CYB5R4 PE=1 SV=1	CYB5R4	anatomical structure development;biological regulation;carbohydrate homeostasis;cell development;cellular developmental process;cellular metabolic process;cellular nitrogen compound metabolic process;cellular process;chemical homeostasis;coenzyme metabolic process;cofactor metabolic process;detection of chemical stimulus;detection of oxygen;detection of stimulus;developmental process;establishmen…	binding;catalytic activity;cation binding;coenzyme binding;cofactor binding;cytochrome-b5 reductase activity;flavin adenine dinucleotide binding;heme binding;ion binding;iron ion binding;metal ion binding;NAD(P)H oxidase activity;NADPH-hemoprotein reductase activity;oxidoreductase activity;oxidoreductase activity, acting on NADH or NADPH;oxidoreductase activity, acting on NADH or NADPH, heme prot…	cell part;cytoplasmic part;endoplasmic reticulum;intracellular membrane-bounded organelle;intracellular organelle;intracellular part;membrane-bounded organelle;organelle;perinuclear region of cytoplasm	14.6694	0.00651993	32.1249	42.6607	35.9349	38.0393	0.409552	8.04976	4.1499	8.69745	0.688958	1.08547	1.61024	1.17516	112.568	3.42037	1.79998	5.08366
+	1.05025	5.0078	32.1736	P00338;Q9BE24	L-lactate dehydrogenase A chain OS=Homo sapiens OX=9606 GN=LDHA PE=1 SV=2	LDHA	alcohol catabolic process;alcohol metabolic process;anatomical structure development;carbohydrate catabolic process;carbohydrate metabolic process;carboxylic acid metabolic process;catabolic process;cell communication;cellular carbohydrate catabolic process;cellular carbohydrate metabolic process;cellular ketone metabolic process;cellular metabolic process;cellular process;cellular response to ex…	catalytic activity;lactate dehydrogenase activity;L-lactate dehydrogenase activity;oxidoreductase activity;oxidoreductase activity, acting on CH-OH group of donors;oxidoreductase activity, acting on the CH-OH group of donors, NAD or NADP as acceptor	cell part;cell projection part;cytoplasmic part;cytosol;extracellular membrane-bounded organelle;extracellular organelle;extracellular region part;extracellular vesicular exosome;flagellar fibrous sheath;flagellum part;intracellular membrane-bounded organelle;intracellular organelle;intracellular organelle part;intracellular part;membrane;membrane-bounded organelle;membrane-bounded vesicle;microt…	46.1855	0.00384584	0.973551	500.376	1017.62	845.653	557.85	554.935	499.682	708.336	1.28048	7.3197	8.84784	5.00288	518.55	885.606	841.718	818.988
+	4.33861	4.93367	30.562	P35232	Prohibitin OS=Homo sapiens OX=9606 GN=PHB PE=1 SV=1	PHB	biological regulation;biosynthetic process;cell differentiation;cellular biosynthetic process;cellular component organization;cellular component organization at cellular level;cellular component organization or biogenesis;cellular component organization or biogenesis at cellular level;cellular developmental process;cellular macromolecule biosynthetic process;cellular macromolecule metabolic proce…	binding;complement binding;complement component C3a binding;complement component C3b binding;DNA binding;enzyme binding;G-protein-coupled receptor binding;histone deacetylase binding;nucleic acid binding;nucleic acid binding transcription factor activity;opsonin binding;protein binding;proteinase activated receptor binding;receptor binding;regulatory region DNA binding;regulatory region nucleic a…	cell part;cell surface;cytoplasm;cytoplasmic part;early endosome;endosome;extracellular membrane-bounded organelle;extracellular organelle;extracellular region part;extracellular vesicular exosome;integral to membrane;integral to plasma membrane;intracellular membrane-bounded organelle;intracellular organelle;intracellular organelle part;intracellular part;intrinsic to membrane;intrinsic to plasm…	45.1439	6.78e-07	50.4592	51.5465	72.4766	62.8558	18.4552	113.061	107.89	103.631	0	4.18365	2.42005	1.44184	392.444	343.578	379.322	237.524
+	5.53761	4.67062	25.468	P50897	Palmitoyl-protein thioesterase 1 OS=Homo sapiens OX=9606 GN=PPT1 PE=1 SV=1	PPT1	adult behavior;adult locomotory behavior;anatomical structure development;associative learning;behavior;biological regulation;brain development;catabolic process;cation homeostasis;cell development;cellular catabolic process;cellular cation homeostasis;cellular chemical homeostasis;cellular component organization;cellular component organization or biogenesis;cellular developmental process;cellula…	acyl-CoA thioesterase activity;catalytic activity;CoA hydrolase activity;hydrolase activity;hydrolase activity, acting on ester bonds;palmitoyl-(protein) hydrolase activity;palmitoyl-CoA hydrolase activity;thiolester hydrolase activity	axon;cell body;cell part;cell projection;clathrin-coated vesicle;coated vesicle;cytoplasmic membrane-bounded vesicle;cytoplasmic part;cytoplasmic vesicle;cytosol;dendrite;extracellular membrane-bounded organelle;extracellular organelle;extracellular region;extracellular region part;extracellular space;extracellular vesicular exosome;Golgi apparatus;intracellular membrane-bounded organelle;intrace…	16.0162	1.01e-06	79.0557	86.5104	85.2534	95.8119	34.0229	164.184	169.473	169.55	4.727	4.57984	2.48788	2.61442	41.995	127.1	69.4684	61.9754
+	6.61729	4.46476	22.0813	P51858	Hepatoma-derived growth factor OS=Homo sapiens OX=9606 GN=HDGF PE=1 SV=1	HDGF	biological regulation;cell proliferation;cellular macromolecule metabolic process;cellular metabolic process;cellular process;cellular protein metabolic process;cellular response to chemical stimulus;cellular response to organic substance;cellular response to stimulus;cellular response to stress;cellular response to topologically incorrect protein;cellular response to unfolded protein;endoplasmic…	binding;carbohydrate binding;DNA binding;glycosaminoglycan binding;heparin binding;nucleic acid binding;nucleotide binding;pattern binding;polysaccharide binding;protein binding transcription factor activity;RNA polymerase II transcription cofactor activity;RNA polymerase II transcription corepressor activity;RNA polymerase II transcription factor binding transcription factor activity;RNA polymer…	cell part;cytoplasm;extracellular region part;extracellular space;intracellular organelle part;intracellular part;macromolecular complex;nuclear part;nucleoplasm;nucleoplasm part;organelle part;protein complex;transcriptional repressor complex	23.271	0.000141755	548.851	483.407	558.823	754.39	185.658	422.773	240.032	787.518	20.8835	25.715	31.1655	29.8101	24.5415	271.49	171.645	257.461
+	3.14615	3.96669	15.6348	P23246	Splicing factor, proline- and glutamine-rich OS=Homo sapiens OX=9606 GN=SFPQ PE=1 SV=2	SFPQ	alternative nuclear mRNA splicing, via spliceosome;biological regulation;biosynthetic process;cellular biosynthetic process;cellular component organization;cellular component organization at cellular level;cellular component organization or biogenesis;cellular component organization or biogenesis at cellular level;cellular macromolecule biosynthetic process;cellular macromolecule metabolic proces…	binding;core promoter binding;DNA binding;enzyme binding;histone deacetylase binding;nucleic acid binding;nucleotide binding;protein binding;regulatory region DNA binding;regulatory region nucleic acid binding;sequence-specific DNA binding;transcription regulatory region DNA binding;transcription regulatory region sequence-specific DNA binding	cell part;chromatin;chromosomal part;cytoplasm;intracellular membrane-bounded organelle;intracellular organelle;intracellular organelle part;intracellular part;membrane-bounded organelle;nuclear body;nuclear matrix;nuclear part;nucleoplasm;nucleoplasm part;nucleus;organelle;organelle part;paraspeckles	41.6776	2.27e-05	12.0612	8.94188	8.8296	9.61889	28.6866	9.2698	5.75386	10.573	1.83755	0.586771	0.593176	0.254161	24.8158	110.983	25.4351	15.5517
+	3.41297	3.8439	14.3592	Q99543	DnaJ homolog subfamily C member 2 OS=Homo sapiens OX=9606 GN=DNAJC2 PE=1 SV=4	DNAJC2	biological regulation;biosynthetic process;cellular biosynthetic process;cellular component organization;cellular component organization at cellular level;cellular component organization or biogenesis;cellular component organization or biogenesis at cellular level;cellular macromolecule biosynthetic process;cellular macromolecule metabolic process;cellular metabolic process;cellular nitrogen comp…	binding;chromatin binding;DNA binding;heat shock protein binding;histone binding;Hsp70 protein binding;nucleic acid binding;protein binding;small conjugating protein binding;ubiquitin binding	cell part;cytoplasm;cytoplasmic part;cytosol;intracellular membrane-bounded organelle;intracellular organelle;intracellular organelle part;intracellular part;membrane;membrane-bounded organelle;nuclear membrane;nuclear part;nucleoplasm;nucleus;organelle;organelle membrane;organelle part	4.2587	0.0024919	32.0579	34.5686	34.4715	29.5794	17.3243	0	0.508396	2.01054	3.13696	4.28996	2.42691	0.863026	0	0.937919	3.74799	2.83969
+	8.52292	3.80224	13.9504	P35579;P14105;Q62812	Myosin-9 OS=Homo sapiens OX=9606 GN=MYH9 PE=1 SV=4	MYH9	actin cytoskeleton organization;actin cytoskeleton reorganization;actin filament-based movement;actin filament-based process;actomyosin structure organization;anatomical structure formation involved in morphogenesis;angiogenesis;axon guidance;biological adhesion;biological regulation;blood vessel endothelial cell migration;cell adhesion;cell cycle process;cell differentiation;cell migration;cell …	actin binding;actin filament binding;actin-dependent ATPase activity;adenyl nucleotide binding;adenyl ribonucleotide binding;ADP binding;ATP binding;ATPase activity;ATPase activity, coupled;binding;catalytic activity;cytoskeletal protein binding;hydrolase activity;hydrolase activity, acting on acid anhydrides;hydrolase activity, acting on acid anhydrides, in phosphorus-containing anhydrides;ident…	actin cytoskeleton;actin filament bundle;actomyosin;actomyosin contractile ring;adherens junction;anchoring junction;cell cortex part;cell division site part;cell junction;cell leading edge;cell part;cell projection;cell-cell adherens junction;cell-cell junction;cleavage furrow;contractile ring;cytoplasm;cytoplasmic part;cytoskeletal part;cytoskeleton;cytosol;extracellular membrane-bounded organe…	773.968	1.34e-10	20812.7	19551.5	24960.3	24193.4	2502.72	2883.81	1609.22	2533.5	1801.88	1519.82	1557.35	1613.19	1513.22	938.542	1399.24	1051.87
+	3.21315	3.77937	13.7311	P27348	14-3-3 protein theta OS=Homo sapiens OX=9606 GN=YWHAQ PE=1 SV=1	YWHAQ	anatomical structure development;apoptosis;biological regulation;biosynthetic process;cell death;cellular biosynthetic process;cellular component organization;cellular component organization or biogenesis;cellular macromolecule metabolic process;cellular metabolic process;cellular nitrogen compound metabolic process;cellular process;cellular response to stimulus;death;developmental process;establ…	binding;protein binding;protein N-terminus binding	adherens junction;anchoring junction;cell junction;cell part;cell-substrate adherens junction;cell-substrate junction;cytoplasm;cytoplasmic part;cytoplasmic vesicle membrane;cytoplasmic vesicle part;cytosol;extracellular membrane-bounded organelle;extracellular organelle;extracellular region part;extracellular vesicular exosome;focal adhesion;intracellular organelle part;intracellular part;macrom…	65.9227	5.98e-05	395.098	152.911	588.013	706.037	141.056	63.6615	178.258	35.1504	36.184	41.6221	33.4727	14.8422	371.444	456.711	289.324	449.15
+	5.35628	3.74334	13.3923	P12830	Cadherin-1 OS=Homo sapiens OX=9606 GN=CDH1 PE=1 SV=3	CDH1	adherens junction organization;anatomical structure development;anatomical structure formation involved in morphogenesis;anatomical structure morphogenesis;apoptosis;biological adhesion;biological regulation;calcium-dependent cell-cell adhesion;cell adhesion;cell death;cell development;cell differentiation;cell junction assembly;cell junction organization;cell morphogenesis;cell morphogenesis inv…	ankyrin binding;beta-catenin binding;binding;calcium ion binding;cation binding;cell adhesion molecule binding;cytoskeletal protein binding;gamma-catenin binding;glycoprotein binding;GTPase activating protein binding;ion binding;metal ion binding;protein binding	actin cytoskeleton;adherens junction;aggresome;anchoring junction;apical junction complex;apical part of cell;axon part;axon terminus;basolateral plasma membrane;catenin complex;cell junction;cell part;cell projection part;cell surface;cell-cell adherens junction;cell-cell junction;cell-substrate adherens junction;cell-substrate junction;cytoplasm;cytoplasmic part;cytoskeleton;endosome;extracellu…	31.4251	0.000979839	636.292	728.405	631.529	602.419	82.5017	15.4327	104.269	46.217	63.8189	37.0473	36.8889	66.6474	106.236	219.593	12.9874	69.768
+	9.36061	3.72429	13.2167	P23141;Q9UKY3	Liver carboxylesterase 1 OS=Homo sapiens OX=9606 GN=CES1 PE=1 SV=2	CES1;CES1P1	anatomical structure morphogenesis;cell differentiation;cellular developmental process;cellular process;developmental process;epithelial cell differentiation;metabolic process;response to chemical stimulus;response to stimulus;response to toxin	carboxylic ester hydrolase activity;catalytic activity;deacetylase activity;hydrolase activity;hydrolase activity, acting on ester bonds;methylumbelliferyl-acetate deacetylase activity	cell part;cytoplasmic part;endoplasmic reticulum;endoplasmic reticulum lumen;endoplasmic reticulum part;extracellular region;extracellular region part;extracellular space;intracellular membrane-bounded organelle;intracellular organelle;intracellular organelle lumen;intracellular organelle part;intracellular part;membrane-bounded organelle;membrane-enclosed lumen;organelle;organelle lumen;organell…	318.821	1.67e-11	8945.88	8931.5	9593.49	8971.75	10693.7	11314.3	6957.96	9643.07	728.564	662.431	684.452	723.513	941.853	747.978	1332.76	955.329
+	5.90829	3.60386	12.1582	P06733;O02654;P07322;P07323;P08734;P09104;P13929;P17182;P17183;P19140;P21550;P25704;P42897;P51913;Q27727;Q27877;Q9PVK2;Q9W7L0;Q9W7L1;Q9W7L2	Alpha-enolase OS=Homo sapiens OX=9606 GN=ENO1 PE=1 SV=2	ENO1;ENO2;ENO3	aging;alcohol biosynthetic process;alcohol metabolic process;anatomical structure development;anatomical structure morphogenesis;biological regulation;biosynthetic process;carbohydrate biosynthetic process;carbohydrate metabolic process;cellular biosynthetic process;cellular carbohydrate biosynthetic process;cellular carbohydrate metabolic process;cellular macromolecule biosynthetic process;cellu…	binding;carbon-oxygen lyase activity;catalytic activity;cation binding;DNA binding;enzyme binding;GTPase binding;hydro-lyase activity;ion binding;lyase activity;magnesium ion binding;metal ion binding;nucleic acid binding;nucleic acid binding transcription factor activity;phosphopyruvate hydratase activity;protein binding;protein binding transcription factor activity;sequence-specific DNA binding…	cell part;contractile fiber part;cytoplasm;cytoplasmic part;cytosol;cytosolic part;extracellular membrane-bounded organelle;extracellular organelle;extracellular region part;extracellular space;extracellular vesicular exosome;intracellular membrane-bounded organelle;intracellular organelle;intracellular part;M band;macromolecular complex;membrane;membrane-bounded organelle;membrane-bounded vesicl…	347.069	2.97e-08	5319.12	5980.99	9496.4	9061.87	5110.58	7640.58	4595.37	6990.6	513.491	603.735	679.982	630.266	4856.92	8122.83	4738.87	9265.33
+	1.84726	3.58736	12.02	P49368	T-complex protein 1 subunit gamma OS=Homo sapiens OX=9606 GN=CCT3 PE=1 SV=4	CCT3	binding of sperm to zona pellucida;cell recognition;cell-cell recognition;cellular component assembly;cellular component assembly at cellular level;cellular component organization;cellular component organization at cellular level;cellular component organization or biogenesis;cellular component organization or biogenesis at cellular level;cellular macromolecule metabolic process;cellular metabolic…	adenyl nucleotide binding;adenyl ribonucleotide binding;ATP binding;binding;nucleotide binding;protein binding;purine nucleotide binding;purine ribonucleoside triphosphate binding;purine ribonucleotide binding;ribonucleotide binding;unfolded protein binding	cell body;cell part;chaperonin-containing T-complex;cytoplasm;cytoplasmic part;cytoskeletal part;cytoskeleton;cytosol;cytosolic part;extracellular membrane-bounded organelle;extracellular organelle;extracellular region part;extracellular vesicular exosome;intracellular non-membrane-bounded organelle;intracellular organelle;intracellular organelle part;intracellular part;macromolecular complex;mem…	54.6148	0.0172263	363.774	326.392	333.849	292.992	113.804	412.269	96.9318	474.236	86.8256	48.2034	39.3402	3.58337	38.669	266.72	435.944	172.863
+	5.89536	3.52488	11.5105	Q9NZM1	Myoferlin OS=Homo sapiens OX=9606 GN=MYOF PE=1 SV=1	MYOF	anatomical structure formation involved in morphogenesis;biological regulation;blood circulation;cellular component organization;cellular component organization or biogenesis;cellular membrane organization;cellular process;cellular response to heat;cellular response to stimulus;cellular response to stress;circulatory system process;developmental process;membrane organization;multicellular organis…	binding;lipid binding;phospholipid binding	caveola;cell part;cytoplasmic part;cytoplasmic vesicle;cytoplasmic vesicle membrane;cytoplasmic vesicle part;envelope;extracellular membrane-bounded organelle;extracellular organelle;extracellular region part;extracellular vesicular exosome;integral to membrane;intracellular membrane-bounded organelle;intracellular organelle;intracellular organelle part;intracellular part;intrinsic to membrane;me…	57.6381	6.42e-06	155.886	173.928	161.724	153.808	322.354	101.231	102.217	94.9262	14.4774	13.5092	10.4389	19.9555	169.577	65.7394	201.957	102.808
+	3.35725	3.42377	10.7314	P30153	Serine/threonine-protein phosphatase 2A 65 kDa regulatory subunit A alpha isoform OS=Homo sapiens OX=9606 GN=PPP2R1A PE=1 SV=4	PPP2R1A	apoptosis;biological regulation;catabolic process;cell cycle;cell cycle process;cell death;cell surface receptor linked signaling pathway;cellular catabolic process;cellular component assembly;cellular component organization;cellular component organization at cellular level;cellular component organization or biogenesis;cellular component organization or biogenesis at cellular level;cellular lipid…	antigen binding;binding;catalytic activity;enzyme regulator activity;hydrolase activity;hydrolase activity, acting on ester bonds;phosphatase activity;phosphatase regulator activity;phosphoprotein phosphatase activity;phosphoric ester hydrolase activity;protein binding;protein dimerization activity;protein heterodimerization activity;protein phosphatase regulator activity;protein phosphatase type…	cell part;chromosomal part;chromosome, centromeric region;cytoplasmic part;cytoskeleton;cytosol;extracellular membrane-bounded organelle;extracellular organelle;extracellular region part;extracellular vesicular exosome;intracellular membrane-bounded organelle;intracellular non-membrane-bounded organelle;intracellular organelle;intracellular organelle part;intracellular part;macromolecular complex…	25.8094	0.0170691	619.727	494.322	1123.28	1046.16	1.2241	128.808	75.923	55.2308	110.938	103.817	75.5749	33.0692	26.0935	262.541	126.569	313.374
+	5.66514	3.3604	10.2702	P04626	Receptor tyrosine-protein kinase erbB-2 OS=Homo sapiens OX=9606 GN=ERBB2 PE=1 SV=1	ERBB2	anatomical structure development;axon ensheathment;axon guidance;biological regulation;biosynthetic process;cell differentiation;cell proliferation;cell surface receptor linked signaling pathway;cellular biosynthetic process;cellular component organization;cellular component organization or biogenesis;cellular developmental process;cellular macromolecule biosynthetic process;cellular macromolecul…	adenyl nucleotide binding;adenyl ribonucleotide binding;ATP binding;binding;catalytic activity;enzyme binding;ErbB-3 class receptor binding;identical protein binding;kinase activity;molecular transducer activity;nucleotide binding;phosphatase binding;phosphotransferase activity, alcohol group as acceptor;protein binding;protein C-terminus binding;protein dimerization activity;protein heterodimeri…	apical plasma membrane;basolateral plasma membrane;cell part;cytoplasm;cytoplasmic part;cytoplasmic vesicle;endosomal part;endosome membrane;integral to membrane;intracellular membrane-bounded organelle;intracellular organelle;intracellular organelle part;intracellular part;intrinsic to membrane;macromolecular complex;membrane;membrane part;membrane-bounded organelle;nucleus;organelle;organelle m…	125.464	6.24e-09	2056.41	2115.64	2189.71	2210.08	740.566	732.194	591.188	930.298	208.595	150.697	205.094	311.283	366.09	269.976	301.288	394.617
+	6.0567	3.31323	9.93987	P23528	Cofilin-1 OS=Homo sapiens OX=9606 GN=CFL1 PE=1 SV=3	CFL1	actin cytoskeleton organization;actin filament depolymerization;actin filament organization;actin filament-based process;actin polymerization or depolymerization;ameboidal cell migration;anatomical structure morphogenesis;axon guidance;biological regulation;blood coagulation;cell activation;cell cycle cytokinesis;cell cycle process;cell migration;cell motility;cell surface receptor linked signali…		adherens junction;anchoring junction;cell cortex part;cell junction;cell part;cell projection membrane;cell projection part;cell-cell junction;cell-substrate adherens junction;cell-substrate junction;cortical actin cytoskeleton;cortical cytoskeleton;cytoplasm;cytoplasmic part;cytoskeletal part;cytoskeleton;extracellular membrane-bounded organelle;extracellular organelle;extracellular region part;…	91.7865	1.64e-08	460.094	549.327	808.818	750.432	772.22	786.043	469.223	884.996	58.8348	58.4243	70.4757	68.7923	3435.2	2507.24	1135.6	1926.83
+	3.78039	3.28702	9.76096	P14868	Aspartate--tRNA ligase, cytoplasmic OS=Homo sapiens OX=9606 GN=DARS PE=1 SV=2	DARS	amine metabolic process;amino acid activation;aspartyl-tRNA aminoacylation;biosynthetic process;carboxylic acid metabolic process;cellular amine metabolic process;cellular amino acid metabolic process;cellular biosynthetic process;cellular component assembly;cellular component organization;cellular component organization or biogenesis;cellular ketone metabolic process;cellular macromolecule biosy…	adenyl nucleotide binding;adenyl ribonucleotide binding;aminoacylase activity;aminoacyl-tRNA ligase activity;aspartate-tRNA ligase activity;ATP binding;binding;catalytic activity;hydrolase activity;hydrolase activity, acting on carbon-nitrogen (but not peptide) bonds;hydrolase activity, acting on carbon-nitrogen (but not peptide) bonds, in linear amides;ligase activity;ligase activity, forming am…	cell part;cytoplasm;cytoplasmic part;cytosol;extracellular membrane-bounded organelle;extracellular organelle;extracellular region part;extracellular vesicular exosome;intracellular part;membrane;membrane-bounded organelle;membrane-bounded vesicle;organelle;vesicle	10.784	0.000286403	42.0778	43.6664	41.0693	43.373	103.331	33.9253	32.6712	27.5188	8.78383	2.56836	4.84099	3.50093	36.8821	19.6894	120.928	20.3104
+	1.80861	3.24289	9.46688	Q6YN16	Hydroxysteroid dehydrogenase-like protein 2 OS=Homo sapiens OX=9606 GN=HSDL2 PE=1 SV=1	HSDL2		catalytic activity;oxidoreductase activity	cell part;cytoplasmic part;intracellular membrane-bounded organelle;intracellular organelle;intracellular part;membrane;membrane-bounded organelle;microbody;mitochondrion;organelle;peroxisome	13.7566	0.00185732	31.2123	25.9791	27.887	24.2248	83.9376	22.907	223.782	23.0193	11.8492	0	5.61724	0.613479	45.9754	375.799	41.2668	490.991
+	1.26001	3.18242	9.07829	P13010	X-ray repair cross-complementing protein 5 OS=Homo sapiens OX=9606 GN=XRCC5 PE=1 SV=3	XRCC5	anatomical structure development;anatomical structure homeostasis;biological regulation;biosynthetic process;brain development;cell differentiation;cell proliferation;cellular biosynthetic process;cellular component organization;cellular component organization at cellular level;cellular component organization or biogenesis;cellular component organization or biogenesis at cellular level;cellular d…	adenyl nucleotide binding;adenyl ribonucleotide binding;ATP binding;ATPase activity;ATPase activity, coupled;ATP-dependent DNA helicase activity;ATP-dependent helicase activity;binding;catalytic activity;damaged DNA binding;DNA binding;DNA helicase activity;DNA-dependent ATPase activity;double-stranded DNA binding;enzyme binding;helicase activity;hydrolase activity;hydrolase activity, acting on a…	cell part;chromosomal part;chromosome, telomeric region;cytoplasmic part;cytosol;intracellular membrane-bounded organelle;intracellular non-membrane-bounded organelle;intracellular organelle;intracellular organelle part;intracellular part;Ku70:Ku80 complex;macromolecular complex;membrane;membrane-bounded organelle;nonhomologous end joining complex;non-membrane-bounded organelle;nuclear chromosome…	66.3953	0.0150246	6.06172	106.194	467.827	164.684	34.6591	334.191	20.9335	415.251	11.6949	5.89607	7.36217	15.2524	596.565	317.551	324.076	130.04
+	3.97133	3.08701	8.49732	Q16851	UTP--glucose-1-phosphate uridylyltransferase OS=Homo sapiens OX=9606 GN=UGP2 PE=1 SV=5	UGP2	alcohol metabolic process;biosynthetic process;carbohydrate biosynthetic process;carbohydrate metabolic process;carboxylic acid biosynthetic process;carboxylic acid metabolic process;cellular biosynthetic process;cellular carbohydrate biosynthetic process;cellular carbohydrate metabolic process;cellular glucan metabolic process;cellular glucuronidation;cellular ketone metabolic process;cellular m…	binding;carbohydrate binding;catalytic activity;cation binding;glucose binding;identical protein binding;ion binding;metal ion binding;monosaccharide binding;nucleotide binding;nucleotidyltransferase activity;protein binding;pyrimidine nucleotide binding;pyrimidine ribonucleotide binding;ribonucleotide binding;sugar binding;transferase activity;transferase activity, transferring phosphorus-contai…	cell part;cytoplasmic part;cytosol;extracellular membrane-bounded organelle;extracellular organelle;extracellular region part;extracellular vesicular exosome;intracellular membrane-bounded organelle;intracellular organelle;intracellular part;membrane-bounded organelle;membrane-bounded vesicle;nucleus;organelle;vesicle	9.7091	0.00057613	15.4553	21.5584	23.3218	20.9732	11.1665	8.92731	7.22473	7.58056	3.64206	1.71236	3.2445	1.63829	8.4529	2.01873	3.09712	14.3645
+	6.12461	3.06102	8.34563	P63104	14-3-3 protein zeta/delta OS=Homo sapiens OX=9606 GN=YWHAZ PE=1 SV=1	YWHAZ	amine transport;apoptosis;biological regulation;biosynthetic process;blood coagulation;cell activation;cell death;cellular biosynthetic process;cellular component assembly;cellular component assembly at cellular level;cellular component organization;cellular component organization at cellular level;cellular component organization or biogenesis;cellular component organization or biogenesis at cell…	binding;enzyme binding;identical protein binding;kinase binding;protein binding;protein kinase binding;transcription factor binding;ubiquitin protein ligase binding	adherens junction;anchoring junction;blood microparticle;cell junction;cell leading edge;cell part;cell-substrate adherens junction;cell-substrate junction;cytoplasm;cytoplasmic membrane-bounded vesicle;cytoplasmic part;cytoplasmic vesicle;cytoplasmic vesicle membrane;cytoplasmic vesicle part;cytoskeletal part;cytosol;extracellular membrane-bounded organelle;extracellular organelle;extracellular …	154.861	5.84e-10	456.094	414.792	392.816	355.963	1809.33	1878.3	1248.37	1339.25	41.6074	52.4261	53.1497	49.8785	639.982	1443.88	735.618	1306.03
+	2.92373	3.04437	8.24985	Q9Y6N5	Sulfide:quinone oxidoreductase, mitochondrial OS=Homo sapiens OX=9606 GN=SQOR PE=1 SV=1	SQRDL	amine catabolic process;amine metabolic process;carboxylic acid catabolic process;carboxylic acid metabolic process;catabolic process;cellular amine metabolic process;cellular amino acid catabolic process;cellular amino acid metabolic process;cellular catabolic process;cellular ketone metabolic process;cellular metabolic process;cellular nitrogen compound metabolic process;cellular process;hydrog…	binding;catalytic activity;cofactor binding;oxidoreductase activity;oxidoreductase activity, acting on a sulfur group of donors;oxidoreductase activity, acting on a sulfur group of donors, quinone or similar compound as acceptor;quinone binding;sulfide:quinone oxidoreductase activity	cell part;cytoplasmic part;intracellular organelle part;intracellular part;membrane;mitochondrial inner membrane;mitochondrial membrane;mitochondrial part;organelle inner membrane;organelle membrane;organelle part	30.9996	0.00346434	278.065	280.202	268.281	257.021	23.8	144.031	86.424	167.768	59.676	61.7201	19.5138	17.1124	9.28707	47.2314	46.217	58.5861
+	8.96253	2.99297	7.96109	P50991	T-complex protein 1 subunit delta OS=Homo sapiens OX=9606 GN=CCT4 PE=1 SV=4	CCT4	binding of sperm to zona pellucida;cell recognition;cell-cell recognition;cellular macromolecule metabolic process;cellular metabolic process;cellular process;cellular process involved in reproduction;cellular protein metabolic process;'de novo' posttranslational protein folding;'de novo' protein folding;macromolecule metabolic process;metabolic process;primary metabolic process;protein folding;p…	adenyl nucleotide binding;adenyl ribonucleotide binding;ATP binding;binding;nucleotide binding;protein binding;purine nucleotide binding;purine ribonucleoside triphosphate binding;purine ribonucleotide binding;ribonucleotide binding;unfolded protein binding	cell body;cell part;centrosome;chaperonin-containing T-complex;cytoplasm;cytoplasmic membrane-bounded vesicle;cytoplasmic part;cytoplasmic vesicle;cytoskeletal part;cytosol;cytosolic part;extracellular membrane-bounded organelle;extracellular organelle;extracellular region part;extracellular vesicular exosome;intracellular membrane-bounded organelle;intracellular non-membrane-bounded organelle;in…	58.9157	0.000107743	710.365	613.224	807.188	777.909	250.03	95.614	193.252	428.562	86.2992	90.9661	89.1952	103.128	236.647	201.277	390.304	117.829
+	5.72195	2.98201	7.90085	P60660	Myosin light polypeptide 6 OS=Homo sapiens OX=9606 GN=MYL6 PE=1 SV=2	MYL6	actin filament-based movement;actin filament-based process;actin-mediated cell contraction;actin-myosin filament sliding;anatomical structure development;axon guidance;biological regulation;cell surface receptor linked signaling pathway;cellular component movement;cellular process;cellular response to stimulus;chemotaxis;developmental process;enzyme linked receptor protein signaling pathway;ephri…	actin-dependent ATPase activity;ATPase activity;ATPase activity, coupled;binding;calcium ion binding;catalytic activity;cation binding;hydrolase activity;hydrolase activity, acting on acid anhydrides;hydrolase activity, acting on acid anhydrides, in phosphorus-containing anhydrides;ion binding;metal ion binding;motor activity;nucleoside-triphosphatase activity;pyrophosphatase activity;structural …	brush border;cell part;cell projection;cytoplasmic part;cytoskeletal part;cytosol;extracellular membrane-bounded organelle;extracellular organelle;extracellular region part;extracellular vesicular exosome;intracellular organelle part;intracellular part;macromolecular complex;membrane;membrane-bounded organelle;membrane-bounded vesicle;myosin complex;organelle;organelle part;protein complex;unconv…	61.548	0.00821848	1365.01	1535.02	1419.24	1640.05	682.356	58.2921	698.943	712.037	151.524	234.41	198.45	188.299	47.4987	404.186	252.322	221.065
+	2.02201	2.88227	7.3731	P09529	Inhibin beta B chain OS=Homo sapiens OX=9606 GN=INHBB PE=1 SV=2	INHBB	activin receptor signaling pathway;anatomical structure development;biological regulation;cell communication;cell development;cell differentiation;cell surface receptor linked signaling pathway;cellular developmental process;cellular process;cellular process involved in reproduction;cellular response to chemical stimulus;cellular response to endogenous stimulus;cellular response to external stimu…	binding;cytokine activity;cytokine receptor binding;hormone activity;host cell surface binding;host cell surface receptor binding;identical protein binding;protein binding;protein dimerization activity;protein homodimerization activity;receptor binding;transforming growth factor beta receptor binding	cell part;cytoplasmic part;extracellular region;extracellular region part;extracellular space;intracellular part;perinuclear region of cytoplasm	9.8404	0.000960421	63.5979	53.3626	52.5634	53.7214	62.9383	11.6245	33.0501	57.333	15.9371	9.16695	13.4263	1.75311	4.69615	6.85184	10.3856	4.69931
+	1.00577	2.86622	7.29152	P09467;O00757	Fructose-1,6-bisphosphatase 1 OS=Homo sapiens OX=9606 GN=FBP1 PE=1 SV=5	FBP1;FBP2	alcohol biosynthetic process;alcohol metabolic process;biological regulation;biosynthetic process;carbohydrate biosynthetic process;carbohydrate metabolic process;cellular biosynthetic process;cellular carbohydrate biosynthetic process;cellular carbohydrate metabolic process;cellular component assembly;cellular component organization;cellular component organization or biogenesis;cellular metaboli…	adenyl nucleotide binding;adenyl ribonucleotide binding;AMP binding;binding;carbohydrate binding;carbohydrate phosphatase activity;catalytic activity;cation binding;fructose 1,6-bisphosphate 1-phosphatase activity;hydrolase activity;hydrolase activity, acting on ester bonds;identical protein binding;ion binding;metal ion binding;monosaccharide binding;nucleotide binding;phosphatase activity;phosp…	cell junction;cell part;contractile fiber part;cytoplasm;cytoplasmic part;cytosol;extracellular membrane-bounded organelle;extracellular organelle;extracellular region part;extracellular vesicular exosome;intracellular membrane-bounded organelle;intracellular organelle;intracellular part;membrane-bounded organelle;membrane-bounded vesicle;nucleus;organelle;organelle part;vesicle;Z disc	79.2479	5.43e-05	7.58702	31.2291	32.8477	19.9794	141.429	66.0158	66.4463	36.1645	2.23478	0.369363	1.71394	41.2335	505.291	872.892	698.056	606.921
+	3.63292	2.77942	6.86578	P35580	Myosin-10 OS=Homo sapiens OX=9606 GN=MYH10 PE=1 SV=3	MYH10	actin cytoskeleton organization;actin filament-based movement;actin filament-based process;actomyosin structure organization;adult heart development;anatomical structure development;anatomical structure formation involved in morphogenesis;axon guidance;biological adhesion;biological regulation;cardiac cell development;cardiac muscle cell development;cardiac myofibril assembly;cell adhesion;cell c…	actin binding;actin filament binding;actin-dependent ATPase activity;adenyl nucleotide binding;adenyl ribonucleotide binding;ADP binding;ATP binding;ATPase activity;ATPase activity, coupled;binding;catalytic activity;cytoskeletal protein binding;hydrolase activity;hydrolase activity, acting on acid anhydrides;hydrolase activity, acting on acid anhydrides, in phosphorus-containing anhydrides;micro…	actin cytoskeleton;actin filament bundle;actomyosin;axon;cell body;cell cortex;cell division site part;cell part;cell projection;cell projection part;cleavage furrow;cytoplasm;cytoplasmic part;cytoskeletal part;cytoskeleton;cytosol;dendritic spine;extracellular membrane-bounded organelle;extracellular organelle;extracellular region part;extracellular vesicular exosome;growth cone;intracellular me…	64.2188	0.000189609	92.44	92.8841	86.1131	86.0185	14.6956	13.3762	24.6627	6.22151	26.5204	9.56362	10.411	11.4947	13.4386	5.79798	1.98369	12.041
+	5.50768	2.74758	6.71591	P05109	Protein S100-A8 OS=Homo sapiens OX=9606 GN=S100A8 PE=1 SV=1	S100A8	activation of caspase activity;acute inflammatory response;autophagy;biological adhesion;biological regulation;catabolic process;cell adhesion;cell chemotaxis;cell migration;cell motility;cell-cell adhesion;cellular catabolic process;cellular component movement;cellular macromolecule metabolic process;cellular metabolic process;cellular process;cellular protein metabolic process;cellular response…	arachidonic acid binding;binding;calcium ion binding;carboxylic acid binding;cation binding;cytoskeletal protein binding;fatty acid binding;icosanoid binding;icosatetraenoic acid binding;ion binding;lipid binding;metal ion binding;microtubule binding;monocarboxylic acid binding;protein binding;RAGE receptor binding;receptor binding;Toll-like receptor 4 binding;Toll-like receptor binding;transitio…	cell part;cytoplasmic part;cytoskeleton;cytosol;extracellular membrane-bounded organelle;extracellular organelle;extracellular region;extracellular region part;extracellular space;extracellular vesicular exosome;intracellular membrane-bounded organelle;intracellular non-membrane-bounded organelle;intracellular organelle;intracellular part;membrane;membrane-bounded organelle;membrane-bounded vesic…	66.75	4.42e-08	555.255	581.881	598.932	605.879	5372.96	3746.17	5590.58	6501.11	84.6812	69.6276	80.2997	129.086	721.284	156.118	472.642	228.402
+	2.80312	2.59235	6.03078	P22314	Ubiquitin-like modifier-activating enzyme 1 OS=Homo sapiens OX=9606 GN=UBA1 PE=1 SV=3	UBA1	catabolic process;cellular catabolic process;cellular macromolecule catabolic process;cellular macromolecule metabolic process;cellular metabolic process;cellular process;cellular protein metabolic process;cellular response to stimulus;cellular response to stress;macromolecule catabolic process;macromolecule metabolic process;macromolecule modification;metabolic process;modification-dependent mac…	acid-amino acid ligase activity;adenyl nucleotide binding;adenyl ribonucleotide binding;ATP binding;binding;catalytic activity;ligase activity;ligase activity, forming carbon-nitrogen bonds;nucleotide binding;purine nucleotide binding;purine ribonucleoside triphosphate binding;purine ribonucleotide binding;ribonucleotide binding;small conjugating protein ligase activity;small protein activating e…	cell part;cytoplasm;cytoplasmic part;cytosol;extracellular membrane-bounded organelle;extracellular organelle;extracellular region part;extracellular vesicular exosome;intracellular membrane-bounded organelle;intracellular organelle;intracellular part;membrane-bounded organelle;membrane-bounded vesicle;mitochondrion;nucleus;organelle;vesicle	95.47	1.33e-05	183.66	101.915	219.339	129.214	164.084	545.728	227.03	588.932	11.8781	48.8661	22.5184	32.5374	306.761	343.728	392.05	419.555
+	3.30182	2.4712	5.54506	P61978	Heterogeneous nuclear ribonucleoprotein K OS=Homo sapiens OX=9606 GN=HNRNPK PE=1 SV=1	HNRNPK	biological regulation;cellular macromolecule metabolic process;cellular metabolic process;cellular nitrogen compound metabolic process;cellular process;cellular response to stimulus;gene expression;macromolecule metabolic process;metabolic process;mRNA metabolic process;mRNA processing;nitrogen compound metabolic process;nuclear mRNA splicing, via spliceosome;nucleic acid metabolic process;nucleo…	binding;core promoter proximal region DNA binding;core promoter proximal region sequence-specific DNA binding;DNA binding;nucleic acid binding;nucleic acid binding transcription factor activity;regulatory region DNA binding;regulatory region nucleic acid binding;RNA binding;RNA polymerase II core promoter proximal region sequence-specific DNA binding;RNA polymerase II core promoter proximal regio…	adherens junction;anchoring junction;catalytic step 2 spliceosome;cell junction;cell part;cell projection;cell-substrate adherens junction;cell-substrate junction;chromatin;chromosomal part;cytoplasm;cytoskeletal part;extracellular membrane-bounded organelle;extracellular organelle;extracellular region part;extracellular vesicular exosome;focal adhesion;intracellular membrane-bounded organelle;in…	68.7447	8.48e-07	135.197	147.794	240.286	157.105	347.622	248.989	404.713	289.982	28.0357	44.0814	39.7028	17.2433	1084.21	403.9	465.607	350.2
+	5.36354	2.43508	5.40793	P16035	Metalloproteinase inhibitor 2 OS=Homo sapiens OX=9606 GN=TIMP2 PE=1 SV=2	TIMP2	aging;anatomical structure development;biological regulation;cellular component disassembly;cellular component disassembly at cellular level;cellular component organization;cellular component organization at cellular level;cellular component organization or biogenesis;cellular component organization or biogenesis at cellular level;cellular process;cellular response to chemical stimulus;cellular r…	binding;cation binding;endopeptidase inhibitor activity;endopeptidase regulator activity;enzyme activator activity;enzyme binding;enzyme inhibitor activity;enzyme regulator activity;ion binding;metal ion binding;metalloendopeptidase inhibitor activity;metalloenzyme inhibitor activity;metalloenzyme regulator activity;peptidase inhibitor activity;peptidase regulator activity;protease binding;protei…	basement membrane;cell body;cell part;cell projection part;cell surface;extracellular matrix;extracellular matrix part;extracellular membrane-bounded organelle;extracellular organelle;extracellular region;extracellular region part;extracellular space;extracellular vesicular exosome;growth cone;membrane-bounded organelle;membrane-bounded vesicle;neuronal cell body;organelle;proteinaceous extracell…	9.3067	0.00107135	33.5504	39.2037	42.9761	42.7487	1.72185	14.6703	15.1511	20.8774	7.70453	6.838	9.02134	6.30365	0.6751	4.84644	0	3.75607
+	2.11978	2.40078	5.28088	P06702	Protein S100-A9 OS=Homo sapiens OX=9606 GN=S100A9 PE=1 SV=1	S100A9	actin cytoskeleton organization;actin cytoskeleton reorganization;actin filament-based process;activation of caspase activity;autophagy;biological adhesion;biological regulation;catabolic process;cell adhesion;cell chemotaxis;cell communication;cell migration;cell motility;cell-cell adhesion;cell-cell signaling;cellular catabolic process;cellular component movement;cellular component organization…	antioxidant activity;arachidonic acid binding;binding;calcium ion binding;carboxylic acid binding;cation binding;cytoskeletal protein binding;fatty acid binding;icosanoid binding;icosatetraenoic acid binding;ion binding;lipid binding;metal ion binding;microtubule binding;molecular transducer activity;monocarboxylic acid binding;protein binding;RAGE receptor binding;receptor binding;signal transdu…	cell part;cytoplasmic part;cytoskeleton;cytosol;extracellular membrane-bounded organelle;extracellular organelle;extracellular region;extracellular region part;extracellular space;extracellular vesicular exosome;intracellular membrane-bounded organelle;intracellular non-membrane-bounded organelle;intracellular organelle;intracellular part;membrane;membrane-bounded organelle;membrane-bounded vesic…	99.1051	1.79e-05	941.064	954.555	266.17	239.627	5541.47	5740.12	3622.6	1237.7	102.667	81.4387	83.9203	111.34	311.844	636.02	832.291	307.567
+	2.51953	2.29743	4.91581	P13639;P05086;P05197;P09445;P58252;Q90705	Elongation factor 2 OS=Homo sapiens OX=9606 GN=EEF2 PE=1 SV=4	EEF2	biological regulation;biosynthetic process;cell differentiation;cellular biosynthetic process;cellular developmental process;cellular macromolecule biosynthetic process;cellular macromolecule metabolic process;cellular metabolic process;cellular process;cellular protein metabolic process;developmental process;gene expression;hemopoietic progenitor cell differentiation;macromolecule biosynthetic p…	binding;catalytic activity;enzyme binding;GTP binding;GTPase activity;guanyl nucleotide binding;guanyl ribonucleotide binding;hydrolase activity;hydrolase activity, acting on acid anhydrides;hydrolase activity, acting on acid anhydrides, in phosphorus-containing anhydrides;kinase binding;nucleic acid binding;nucleoside-triphosphatase activity;nucleotide binding;protein binding;protein kinase bind…	aggresome;cell part;cytoplasm;cytoplasmic part;cytosol;extracellular membrane-bounded organelle;extracellular organelle;extracellular region part;extracellular vesicular exosome;inclusion body;intracellular membrane-bounded organelle;intracellular organelle;intracellular part;macromolecular complex;membrane;membrane-bounded organelle;membrane-bounded vesicle;nucleus;organelle;plasma membrane;poly…	143.08	0.000924876	1057.49	1026.52	1342.8	977.677	266.126	818.268	674.13	546.255	291.123	287.788	339.248	91.0531	926.691	613.031	1131.25	792.108
+	5.7634	2.28524	4.87444	A6NP61	ZAR1-like protein OS=Homo sapiens OX=9606 GN=ZAR1L PE=2 SV=2	ZAR1L			cell part;cytoplasm;intracellular part	4.5011	0.0023558	129.185	121.866	121.908	108.731	49.4571	38.2808	62.9952	122.071	23.4174	22.58	22.9285	32.3319	39.1832	11.1299	3.60032	35.704
+	1.54167	2.22578	4.67765	Q99623	Prohibitin-2 OS=Homo sapiens OX=9606 GN=PHB2 PE=1 SV=2	PHB2	anatomical structure development;anatomical structure morphogenesis;biological regulation;biosynthetic process;branching involved in mammary gland duct morphogenesis;branching morphogenesis of a tube;cellular biosynthetic process;cellular component organization;cellular component organization at cellular level;cellular component organization or biogenesis;cellular component organization or biogen…	binding;estrogen receptor binding;hormone receptor binding;nuclear hormone receptor binding;protein binding;protein N-terminus binding;receptor binding;steroid hormone receptor binding	cell part;cell surface;cytoplasmic part;extracellular membrane-bounded organelle;extracellular organelle;extracellular region part;extracellular vesicular exosome;intracellular membrane-bounded organelle;intracellular organelle;intracellular organelle part;intracellular part;macromolecular complex;membrane;membrane-bounded organelle;membrane-bounded vesicle;mitochondrial inner membrane;mitochondr…	69.7307	2.61e-06	24.194	26.0968	30.7631	25.3818	259.786	100.706	98.2281	92.3135	3.90715	2.54787	3.62038	30.2995	674.494	505.4	1135.16	340.741
+	4.60231	2.155	4.45369	Q07020	60S ribosomal protein L18 OS=Homo sapiens OX=9606 GN=RPL18 PE=1 SV=2	RPL18	biosynthetic process;catabolic process;cellular biosynthetic process;cellular catabolic process;cellular component disassembly;cellular component disassembly at cellular level;cellular component organization;cellular component organization at cellular level;cellular component organization or biogenesis;cellular component organization or biogenesis at cellular level;cellular macromolecular complex…	binding;nucleic acid binding;RNA binding;structural constituent of ribosome;structural molecule activity	adherens junction;anchoring junction;cell junction;cell part;cell-substrate adherens junction;cell-substrate junction;cytoplasm;cytoplasmic part;cytosol;cytosolic large ribosomal subunit;focal adhesion;intracellular membrane-bounded organelle;intracellular non-membrane-bounded organelle;intracellular organelle;intracellular organelle part;intracellular part;large ribosomal subunit;macromolecular …	35.4865	1.14e-05	43.6307	47.8387	46.9115	49.4178	239.641	446.09	339.087	255.404	13.3582	10.2496	7.49311	12.7125	414.486	112.515	93.1088	35.4185
+	1.33463	2.11142	4.32115	Q15084	Protein disulfide-isomerase A6 OS=Homo sapiens OX=9606 GN=PDIA6 PE=1 SV=1	PDIA6	apoptotic cell clearance;biological regulation;cell redox homeostasis;cellular component organization;cellular component organization or biogenesis;cellular homeostasis;cellular macromolecule metabolic process;cellular membrane organization;cellular metabolic process;cellular process;cellular protein metabolic process;cellular response to chemical stimulus;cellular response to organic substance;c…	catalytic activity;intramolecular oxidoreductase activity;intramolecular oxidoreductase activity, interconverting keto- and enol-groups;intramolecular oxidoreductase activity, transposing S-S bonds;isomerase activity;protein disulfide isomerase activity	cell part;cytoplasmic membrane-bounded vesicle;cytoplasmic part;cytoplasmic vesicle;endoplasmic reticulum;endoplasmic reticulum chaperone complex;endoplasmic reticulum lumen;endoplasmic reticulum membrane;endoplasmic reticulum part;endoplasmic reticulum-Golgi intermediate compartment;extracellular membrane-bounded organelle;extracellular organelle;extracellular region part;extracellular vesicular…	46.5704	7.06e-13	0.163224	0.0747722	0.110462	0.483207	350.129	504.772	327.297	466.071	0.0272787	0.11461	0.039219	0.0161593	570.894	462.78	148.888	463.514
+	4.20903	2.01478	4.04118	P48643	T-complex protein 1 subunit epsilon OS=Homo sapiens OX=9606 GN=CCT5 PE=1 SV=1	CCT5	binding of sperm to zona pellucida;cell recognition;cell-cell recognition;cellular macromolecule metabolic process;cellular metabolic process;cellular process;cellular process involved in reproduction;cellular protein metabolic process;'de novo' posttranslational protein folding;'de novo' protein folding;macromolecule metabolic process;metabolic process;multi-organism process;primary metabolic pr…	adenyl nucleotide binding;adenyl ribonucleotide binding;ATP binding;beta-tubulin binding;binding;cytoskeletal protein binding;G-protein beta-subunit binding;nucleotide binding;protein binding;purine nucleotide binding;purine ribonucleoside triphosphate binding;purine ribonucleotide binding;ribonucleotide binding;tubulin binding	cell body;cell part;centrosome;chaperonin-containing T-complex;cytoplasm;cytoplasmic part;cytoskeletal part;cytosol;cytosolic part;extracellular membrane-bounded organelle;extracellular organelle;extracellular region part;extracellular vesicular exosome;intracellular non-membrane-bounded organelle;intracellular organelle;intracellular organelle part;intracellular part;macromolecular complex;membr…	77.7822	0.0042635	183.02	189.303	196.121	192.482	28.0013	174.23	141.366	119.832	36.8185	38.5533	50.0589	73.1844	42.5223	31.6507	40.6085	82.1301
+	2.61769	1.86271	3.6369	P11142;P08108;P08109;P11503;P19120;P19378;P27541;Q06248;Q90473	Heat shock cognate 71 kDa protein OS=Homo sapiens OX=9606 GN=HSPA8 PE=1 SV=1	HSPA8	axon guidance;biological regulation;biosynthetic process;cell communication;cell-cell signaling;cellular biosynthetic process;cellular component disassembly;cellular component disassembly at cellular level;cellular component organization;cellular component organization at cellular level;cellular component organization or biogenesis;cellular component organization or biogenesis at cellular level;c…	adenyl nucleotide binding;adenyl ribonucleotide binding;antigen binding;ATP binding;ATPase activity;ATPase activity, coupled;binding;C3HC4-type RING finger domain binding;catalytic activity;enzyme binding;G-protein-coupled receptor binding;heat shock protein binding;hydrolase activity;hydrolase activity, acting on acid anhydrides;hydrolase activity, acting on acid anhydrides, in phosphorus-contai…	adherens junction;anchoring junction;blood microparticle;cell junction;cell part;cell-substrate adherens junction;cell-substrate junction;clathrin coated vesicle membrane;clathrin sculpted gamma-aminobutyric acid transport vesicle membrane;coated vesicle membrane;cytoplasmic membrane-bounded vesicle;cytoplasmic part;cytoplasmic vesicle;cytoplasmic vesicle membrane;cytoplasmic vesicle part;cytosol…	198.454	9.76e-08	411.907	582.578	645.337	573.004	2153.03	2113.81	1705.29	1396.81	236.266	79.9581	200.707	141.852	3660.12	2125.23	3089.88	1941.68
+	1.68717	1.83905	3.57776	P35268;Q6P5R6	60S ribosomal protein L22 OS=Homo sapiens OX=9606 GN=RPL22 PE=1 SV=2	RPL22;RPL22L1	alpha-beta T cell activation;alpha-beta T cell differentiation;biosynthetic process;catabolic process;cell activation;cell differentiation;cellular biosynthetic process;cellular catabolic process;cellular component disassembly;cellular component disassembly at cellular level;cellular component organization;cellular component organization at cellular level;cellular component organization or biogen…	binding;carbohydrate binding;glycosaminoglycan binding;heparin binding;nucleic acid binding;pattern binding;polysaccharide binding;RNA binding;structural constituent of ribosome;structural molecule activity	adherens junction;anchoring junction;cell junction;cell part;cell-substrate adherens junction;cell-substrate junction;cytoplasm;cytoplasmic part;cytosol;cytosolic large ribosomal subunit;extracellular membrane-bounded organelle;extracellular organelle;extracellular region part;extracellular vesicular exosome;focal adhesion;intracellular membrane-bounded organelle;intracellular non-membrane-bounde…	45.2578	0.0349092	131.389	27.912	136.249	152.571	222.688	86.5931	97.0577	81.8108	19.9611	38.1029	19.7106	32.9126	14.0126	146.388	33.5579	21.6886
+	3.26318	1.83252	3.56159	O75369	Filamin-B OS=Homo sapiens OX=9606 GN=FLNB PE=1 SV=2	FLNB	actin cytoskeleton organization;actin filament-based process;anatomical structure development;biological regulation;cell differentiation;cell surface receptor linked signaling pathway;cellular component organization;cellular component organization at cellular level;cellular component organization or biogenesis;cellular component organization or biogenesis at cellular level;cellular developmental …	actin binding;binding;cytoskeletal protein binding;identical protein binding;protein binding	actin cytoskeleton;actin filament bundle;actomyosin;adherens junction;anchoring junction;cell cortex;cell junction;cell part;cell-substrate adherens junction;cell-substrate junction;contractile fiber part;cytoplasm;cytoplasmic part;cytoskeletal part;cytoskeleton;cytosol;extracellular membrane-bounded organelle;extracellular organelle;extracellular region part;extracellular vesicular exosome;focal…	151.273	0.00259828	382.141	484.925	616.173	535.521	249.636	364.81	403.756	454.66	93.622	134.409	134.043	238.915	766.502	301.095	228.345	631.388
+	5.16214	1.72649	3.30921	P08195	4F2 cell-surface antigen heavy chain OS=Homo sapiens OX=9606 GN=SLC3A2 PE=1 SV=3	SLC3A2	amine transport;amino acid import;amino acid transport;aromatic amino acid transport;biological regulation;blood coagulation;branched-chain aliphatic amino acid transport;calcium ion transport;carbohydrate metabolic process;carboxylic acid transport;cation transport;cell growth;cell migration;cell motility;cellular component movement;cellular process;coagulation;divalent inorganic cation transpor…	active transmembrane transporter activity;amine transmembrane transporter activity;amino acid transmembrane transporter activity;antiporter activity;binding;calcium ion transmembrane transporter activity;calcium:cation antiporter activity;calcium:sodium antiporter activity;carboxylic acid transmembrane transporter activity;catalytic activity;cation binding;cation transmembrane transporter activit…	apical plasma membrane;cell part;cell surface;cytoplasm;cytoplasmic membrane-bounded vesicle;cytoplasmic part;cytoplasmic vesicle;extracellular membrane-bounded organelle;extracellular organelle;extracellular region part;extracellular vesicular exosome;integral to membrane;intracellular membrane-bounded organelle;intracellular organelle;intracellular organelle part;intracellular part;intrinsic to…	129.191	6.22e-06	412.218	407.614	417.216	424.968	778.387	1115.96	950.906	717.225	101.985	133.594	123.211	156.934	506.46	607.263	228.734	737.582
+	4.97683	1.67754	3.19883	P40227	T-complex protein 1 subunit zeta OS=Homo sapiens OX=9606 GN=CCT6A PE=1 SV=3	CCT6A	binding of sperm to zona pellucida;cell recognition;cell-cell recognition;cellular macromolecule metabolic process;cellular metabolic process;cellular process;cellular process involved in reproduction;cellular protein metabolic process;'de novo' posttranslational protein folding;'de novo' protein folding;macromolecule metabolic process;metabolic process;primary metabolic process;protein folding;p…	adenyl nucleotide binding;adenyl ribonucleotide binding;ATP binding;binding;nucleotide binding;protein binding;purine nucleotide binding;purine ribonucleoside triphosphate binding;purine ribonucleotide binding;ribonucleotide binding;unfolded protein binding	acrosomal vesicle;cell body;cell part;chaperonin-containing T-complex;cytoplasm;cytoplasmic membrane-bounded vesicle;cytoplasmic part;cytoplasmic vesicle;cytoskeletal part;cytosol;cytosolic part;extracellular membrane-bounded organelle;extracellular organelle;extracellular region part;extracellular vesicular exosome;intracellular membrane-bounded organelle;intracellular organelle;intracellular or…	19.4712	0.000478141	127.113	144.398	141.236	137.882	124.792	79.6737	86.1658	91.0815	48.3822	34.562	45.2018	47.8953	143.45	48.1697	62.235	64.0714
+	2.63656	1.67425	3.19153	P67936	Tropomyosin alpha-4 chain OS=Homo sapiens OX=9606 GN=TPM4 PE=1 SV=3	TPM4	actin filament-based movement;actin filament-based process;actin-mediated cell contraction;actin-myosin filament sliding;cell differentiation;cellular component movement;cellular developmental process;cellular process;developmental process;multicellular organismal process;muscle contraction;muscle filament sliding;muscle system process;osteoblast differentiation;system process	binding;calcium ion binding;cation binding;ion binding;metal ion binding;structural constituent of muscle;structural molecule activity	actin filament bundle;actomyosin;adherens junction;anchoring junction;cell cortex part;cell junction;cell part;cell-substrate adherens junction;cell-substrate junction;contractile fiber part;cortical cytoskeleton;cytoplasmic part;cytoskeletal part;cytoskeleton;cytosol;extracellular membrane-bounded organelle;extracellular organelle;extracellular region part;extracellular vesicular exosome;filamen…	19.3385	1.38e-07	101.102	112.59	116.441	149.734	0	0	0	0	46.9553	55.0715	34.3429	22.8419	0	0	0	0
+	5.02238	1.66707	3.1757	O60716	Catenin delta-1 OS=Homo sapiens OX=9606 GN=CTNND1 PE=1 SV=1	CTNND1	adherens junction organization;anatomical structure development;biological adhesion;biological regulation;biosynthetic process;brain development;cell adhesion;cell junction assembly;cell junction organization;cell surface receptor linked signaling pathway;cell-cell adhesion;cell-cell junction organization;cellular biosynthetic process;cellular component assembly;cellular component assembly at cel…	binding;cadherin binding;cell adhesion molecule binding;protein binding;receptor binding	adherens junction;anchoring junction;cell junction;cell part;cell projection;cell projection part;cell-cell adherens junction;cell-cell junction;cytoplasm;cytoplasmic part;cytosol;dendritic spine;extracellular membrane-bounded organelle;extracellular organelle;extracellular region part;extracellular vesicular exosome;growth cone;intracellular membrane-bounded organelle;intracellular organelle;int…	143.363	1.02e-06	1065.16	1094.48	1091.58	1104.65	317.839	284.778	311.997	381.89	355.867	284.407	403.413	358.971	146.074	143.207	312.113	116.072
+	2.61538	1.64187	3.1207	P31947	14-3-3 protein sigma OS=Homo sapiens OX=9606 GN=SFN PE=1 SV=1	SFN	anatomical structure development;apoptosis;apoptotic mitochondrial changes;biological regulation;biosynthetic process;cell death;cell development;cellular biosynthetic process;cellular component organization;cellular component organization at cellular level;cellular component organization or biogenesis;cellular component organization or biogenesis at cellular level;cellular developmental process;…	enzyme inhibitor activity;enzyme regulator activity;kinase inhibitor activity;kinase regulator activity;protein kinase C inhibitor activity;protein kinase inhibitor activity;protein kinase regulator activity;protein serine/threonine kinase inhibitor activity	cell part;cytoplasm;cytoplasmic part;cytoplasmic vesicle membrane;cytoplasmic vesicle part;cytosol;extracellular membrane-bounded organelle;extracellular organelle;extracellular region part;extracellular space;extracellular vesicular exosome;intracellular membrane-bounded organelle;intracellular organelle;intracellular organelle part;intracellular part;membrane;membrane-bounded organelle;membrane…	63.2818	0.00983535	81.121	61.3402	84.1164	96.8912	256.483	462.739	267.024	72.8078	31.6028	15.5774	20.4692	44.9992	35.3231	44.879	386.379	118.821
+	2.90814	1.5913	3.01322	P52209	6-phosphogluconate dehydrogenase, decarboxylating OS=Homo sapiens OX=9606 GN=PGD PE=1 SV=3	PGD	alcohol biosynthetic process;alcohol catabolic process;alcohol metabolic process;aldonic acid metabolic process;biosynthetic process;carbohydrate biosynthetic process;carbohydrate catabolic process;carbohydrate metabolic process;carboxylic acid metabolic process;catabolic process;cellular biosynthetic process;cellular carbohydrate biosynthetic process;cellular carbohydrate catabolic process;cellu…	binding;catalytic activity;coenzyme binding;cofactor binding;NADP binding;nucleotide binding;oxidoreductase activity;oxidoreductase activity, acting on CH-OH group of donors;oxidoreductase activity, acting on the CH-OH group of donors, NAD or NADP as acceptor;phosphogluconate dehydrogenase (decarboxylating) activity	cell part;cytoplasmic part;cytosol;extracellular membrane-bounded organelle;extracellular organelle;extracellular region part;extracellular vesicular exosome;intracellular membrane-bounded organelle;intracellular organelle;intracellular part;membrane-bounded organelle;membrane-bounded vesicle;nucleus;organelle;vesicle	11.2534	0.0399581	173.089	184.483	164.637	169.781	1.25476	48.1617	50.8953	46.6874	96.5785	50.1161	51.9676	45.6481	7.85181	47.3506	26.9568	46.6924
+	2.73597	1.56659	2.96205	P14314	Glucosidase 2 subunit beta OS=Homo sapiens OX=9606 GN=PRKCSH PE=1 SV=2	PRKCSH	biological regulation;carbohydrate metabolic process;cellular carbohydrate metabolic process;cellular macromolecule metabolic process;cellular metabolic process;cellular process;cellular protein metabolic process;cellular response to stimulus;defense response;glycosylation;immune response;immune system process;innate immune response;intracellular signal transduction;macromolecule glycosylation;ma…	binding;calcium ion binding;cation binding;enzyme binding;ion binding;ion channel binding;kinase binding;metal ion binding;phosphoprotein binding;protein binding;protein kinase binding;protein kinase C binding	cell part;cytoplasmic part;endoplasmic reticulum;endoplasmic reticulum lumen;endoplasmic reticulum part;intracellular;intracellular membrane-bounded organelle;intracellular organelle;intracellular organelle lumen;intracellular organelle part;intracellular part;membrane-bounded organelle;membrane-enclosed lumen;organelle;organelle lumen;organelle part	57.0144	1.1e-07	80.348	70.7973	73.4746	74.8767	138.391	218.043	201.618	177.826	18.6893	25.0104	43.6684	21.1211	344.932	300.527	778.709	557.762
+	3.59634	1.51408	2.85617	P21796	Voltage-dependent anion-selective channel protein 1 OS=Homo sapiens OX=9606 GN=VDAC1 PE=1 SV=2	VDAC1	anion transport;apoptosis;behavior;behavioral defense response;behavioral fear response;cell communication;cell death;cell differentiation;cell-cell signaling;cellular developmental process;cellular process;cognition;death;defense response;developmental process;epithelial cell differentiation;establishment of localization;fear response;ion transport;learning;learning or memory;multicellular organ…	anion channel activity;anion transmembrane transporter activity;binding;channel activity;enzyme binding;gated channel activity;ion channel activity;ion transmembrane transporter activity;kinase binding;passive transmembrane transporter activity;porin activity;protein binding;protein kinase binding;substrate-specific channel activity;substrate-specific transmembrane transporter activity;substrate-…	cell part;cytoplasmic part;extracellular membrane-bounded organelle;extracellular organelle;extracellular region part;extracellular vesicular exosome;intracellular membrane-bounded organelle;intracellular non-membrane-bounded organelle;intracellular organelle;intracellular organelle part;intracellular part;macromolecular complex;membrane;membrane part;membrane-bounded organelle;membrane-bounded v…	57.9181	2.85e-08	55.3024	48.6962	47.0805	43.12	133.158	310.036	248.188	529.994	16.275	18.6226	20.9039	13.7506	589.432	788.92	1923.03	1257.37
+	5.0941	1.43728	2.7081	P52907	F-actin-capping protein subunit alpha-1 OS=Homo sapiens OX=9606 GN=CAPZA1 PE=1 SV=3	CAPZA1	actin filament capping;barbed-end actin filament capping;biological regulation;blood coagulation;cellular component assembly;cellular component movement;cellular component organization;cellular component organization or biogenesis;cellular process;coagulation;defense response;hemostasis;immune response;immune system process;innate immune response;macromolecular complex assembly;macromolecular com…	actin binding;binding;cytoskeletal protein binding;protein binding	actin cytoskeleton;cell part;cytoplasmic part;cytoskeletal part;cytoskeleton;cytosol;extracellular membrane-bounded organelle;extracellular organelle;extracellular region;extracellular region part;extracellular vesicular exosome;F-actin capping protein complex;intracellular non-membrane-bounded organelle;intracellular organelle;intracellular organelle part;intracellular part;macromolecular comple…	25.6621	0.00152135	173.237	155.763	158.895	159.129	168.303	135.423	205.225	134.576	52.3821	64.0049	56.9023	70.5131	206	330.008	106.879	615.222
+	4.25466	1.4342	2.70233	P50990	T-complex protein 1 subunit theta OS=Homo sapiens OX=9606 GN=CCT8 PE=1 SV=4	CCT8	binding of sperm to zona pellucida;cell recognition;cell-cell recognition;cellular component assembly;cellular component assembly at cellular level;cellular component organization;cellular component organization at cellular level;cellular component organization or biogenesis;cellular component organization or biogenesis at cellular level;cellular macromolecule metabolic process;cellular metabolic…	adenyl nucleotide binding;adenyl ribonucleotide binding;ATP binding;ATPase activity;ATPase activity, coupled;binding;catalytic activity;hydrolase activity;hydrolase activity, acting on acid anhydrides;hydrolase activity, acting on acid anhydrides, in phosphorus-containing anhydrides;nucleoside-triphosphatase activity;nucleotide binding;purine nucleotide binding;purine ribonucleoside triphosphate …	aggresome;cell body;cell part;centrosome;chaperonin-containing T-complex;cytoplasm;cytoplasmic part;cytoskeletal part;cytoskeleton;cytosol;cytosolic part;extracellular membrane-bounded organelle;extracellular organelle;extracellular region part;extracellular vesicular exosome;inclusion body;intermediate filament cytoskeleton;intracellular non-membrane-bounded organelle;intracellular organelle;int…	165.877	4.82e-05	847.251	792.81	789.075	770.476	476.255	329.134	500.539	452.103	366.074	242.281	297.541	307.723	348.161	244.714	486.435	321.752
+	5.0841	1.4283	2.6913	P05783;P05784	Keratin, type I cytoskeletal 18 OS=Homo sapiens OX=9606 GN=KRT18 PE=1 SV=2	KRT18	anatomical structure morphogenesis;biological regulation;cell cycle;cell surface receptor linked signaling pathway;cellular component organization;cellular component organization at cellular level;cellular component organization or biogenesis;cellular component organization or biogenesis at cellular level;cellular process;cellular response to chemical stimulus;cellular response to cytokine stimul…	binding;protein binding;scaffold protein binding;structural molecule activity	cell part;cell periphery;centriolar satellite;cytoplasm;cytoplasmic part;cytoskeletal part;extracellular membrane-bounded organelle;extracellular organelle;extracellular region part;extracellular vesicular exosome;intermediate filament;intracellular non-membrane-bounded organelle;intracellular organelle;intracellular organelle part;intracellular part;keratin filament;macromolecular complex;membra…	139.65	7.8e-05	974.2	1141.89	1459.65	1387.88	454.269	453.752	549.132	270.765	482.616	437.73	436.347	494.169	329.011	257.865	557.838	456.397
+	3.89457	1.41376	2.6643	P26038	Moesin OS=Homo sapiens OX=9606 GN=MSN PE=1 SV=3	MSN	anatomical structure development;biological adhesion;biological regulation;cell adhesion;cell development;cell migration;cell motility;cell-cell adhesion;cellular component movement;cellular developmental process;cellular process;developmental process;endothelial cell development;epithelial cell development;establishment of endothelial barrier;immune system process;leukocyte cell-cell adhesion;le…	binding;cell adhesion molecule binding;double-stranded RNA binding;enzyme binding;kinase binding;nucleic acid binding;protein binding;protein kinase binding;receptor binding;RNA binding;structural constituent of cytoskeleton;structural molecule activity	adherens junction;anchoring junction;apical part of cell;apical plasma membrane;basolateral plasma membrane;blood microparticle;cell junction;cell part;cell periphery;cell projection;cell projection membrane;cell projection part;cell-substrate adherens junction;cell-substrate junction;cytoplasm;cytoskeleton;extracellular membrane-bounded organelle;extracellular organelle;extracellular region part…	66.9914	0.000725782	80.4075	84.5446	83.1285	94.0357	106.597	164.32	109.773	155.893	35.6988	29.4986	38.8772	27.317	30.205	68.093	24.687	100.857
+	3.5827	1.32158	2.4994	P63261;O18499;O18500;O42161;P02570;P02571;P02572;P04829;P07837;P10983;P10984;P10986;P10987;P12714;P14227;P15475;P17304;P18600;P18601;P18603;P29751;P30162;P30163;P41340;P48975;P49128;P53456;P53471;P53478;P53484;P53485;P53486;P53505;P53506;P60709;P90689;Q00214;Q00215;Q03342;Q25010;Q25472;Q27250;Q92193;Q93129	Actin, cytoplasmic 2 OS=Homo sapiens OX=9606 GN=ACTG1 PE=1 SV=1	ACTB;ACTG1	actin cytoskeleton organization;actin filament-based process;actomyosin structure organization;adherens junction organization;anatomical structure development;anatomical structure homeostasis;ATP-dependent chromatin remodeling;axon guidance;biological adhesion;biological regulation;blood coagulation;cell adhesion;cell junction assembly;cell junction organization;cell surface receptor linked signa…	adenyl nucleotide binding;adenyl ribonucleotide binding;ATP binding;binding;cytoskeletal protein binding;enzyme binding;identical protein binding;kinesin binding;nitric-oxide synthase binding;nucleotide binding;protein binding;purine nucleotide binding;purine ribonucleoside triphosphate binding;purine ribonucleotide binding;ribonucleotide binding;structural constituent of cytoskeleton;structural …	adherens junction;anchoring junction;axon;blood microparticle;cell cortex part;cell junction;cell part;cell projection;cell-substrate adherens junction;cell-substrate junction;chromatin;chromosomal part;contractile fiber;cortical cytoskeleton;cytoplasm;cytoplasmic part;cytoskeletal part;cytoskeleton;cytosol;extracellular membrane-bounded organelle;extracellular organelle;extracellular region part…	545.233	1.66e-06	8556.82	8514.87	10069.1	11712.4	5926.28	7348.1	8121.68	12522.2	3443.34	4139.36	4860.02	3370.72	39998.3	18184.9	38202.1	28115.1
+	1.23724	1.31768	2.49265	P15880	40S ribosomal protein S2 OS=Homo sapiens OX=9606 GN=RPS2 PE=1 SV=2	RPS2	biological regulation;biosynthetic process;catabolic process;cellular biosynthetic process;cellular catabolic process;cellular component disassembly;cellular component disassembly at cellular level;cellular component organization;cellular component organization at cellular level;cellular component organization or biogenesis;cellular component organization or biogenesis at cellular level;cellular …	binding;enzyme binding;fibroblast growth factor binding;growth factor binding;mRNA binding;nucleic acid binding;protein binding;RNA binding;structural constituent of ribosome;structural molecule activity	adherens junction;anchoring junction;cell junction;cell part;cell-substrate adherens junction;cell-substrate junction;cytoplasm;cytoplasmic part;cytosol;cytosolic small ribosomal subunit;extracellular membrane-bounded organelle;extracellular organelle;extracellular region part;extracellular vesicular exosome;focal adhesion;intracellular membrane-bounded organelle;intracellular organelle;intracell…	21.43	0.000253898	7.19003	9.42136	6.33308	9.71275	14.3239	105.613	63.0122	104.562	3.19985	3.76194	7.11441	1.33649	55.5532	109.086	15.2222	96.6272
+	4.18864	1.30497	2.47079	P35221;P26231	Catenin alpha-1 OS=Homo sapiens OX=9606 GN=CTNNA1 PE=1 SV=1	CTNNA1	actin cytoskeleton organization;actin filament organization;actin filament-based process;adherens junction organization;aging;anatomical structure development;anatomical structure morphogenesis;apical junction assembly;axon regeneration;axonogenesis;biological adhesion;biological regulation;cell adhesion;cell differentiation;cell junction assembly;cell junction organization;cell part morphogenesi…	beta-catenin binding;binding;cadherin binding;cell adhesion molecule binding;cytoskeletal protein binding;gamma-catenin binding;protein binding;structural molecule activity;vinculin binding	acrosomal vesicle;actin cytoskeleton;adherens junction;anchoring junction;catenin complex;cell junction;cell part;cell projection;cell-cell adherens junction;cell-cell contact zone;cell-cell junction;cell-substrate adherens junction;cell-substrate junction;cytoplasmic membrane-bounded vesicle;cytoplasmic part;cytoplasmic vesicle;cytoskeleton;cytosol;extrinsic to membrane;extrinsic to plasma membr…	168.61	2.56e-06	1378.4	1316.13	1339.3	1200.94	442.551	236.64	311.406	417.438	531.87	552.286	603.392	468.436	238.175	437.91	201.306	245.204
+	4.583	1.25103	2.38011	P05787	Keratin, type II cytoskeletal 8 OS=Homo sapiens OX=9606 GN=KRT8 PE=1 SV=7	KRT8	actin cytoskeleton organization;actin filament-based process;actomyosin structure organization;biological regulation;cell differentiation;cell differentiation involved in embryonic placenta development;cell surface receptor linked signaling pathway;cellular component organization;cellular component organization at cellular level;cellular component organization or biogenesis;cellular component org…	binding;protein binding;scaffold protein binding;structural molecule activity	cell junction;cell part;cell-cell junction;contractile fiber part;costamere;cytoplasm;cytoplasmic part;cytoskeletal part;cytoskeleton;dystrophin-associated glycoprotein complex;extracellular membrane-bounded organelle;extracellular organelle;extracellular region part;extracellular vesicular exosome;intermediate filament;intermediate filament cytoskeleton;intracellular membrane-bounded organelle;i…	176.316	0.000324524	2528.26	2554.97	2198.81	2550.38	1159.23	1207.03	895.28	1022.63	1023.91	1006.21	1029.25	1128.83	829.819	1103.55	281.14	485.282
+	3.08919	1.19877	2.29544	P30101	Protein disulfide-isomerase A3 OS=Homo sapiens OX=9606 GN=PDIA3 PE=1 SV=4	PDIA3	antigen processing and presentation;antigen processing and presentation of exogenous antigen;antigen processing and presentation of exogenous peptide antigen;antigen processing and presentation of exogenous peptide antigen via MHC class I;antigen processing and presentation of exogenous peptide antigen via MHC class I, TAP-dependent;antigen processing and presentation of peptide antigen;antigen p…	catalytic activity;cysteine-type endopeptidase activity;cysteine-type peptidase activity;disulfide oxidoreductase activity;endopeptidase activity;hydrolase activity;hydrolase activity, acting on ester bonds;intramolecular oxidoreductase activity;intramolecular oxidoreductase activity, interconverting keto- and enol-groups;intramolecular oxidoreductase activity, transposing S-S bonds;isomerase act…	adherens junction;anchoring junction;cell junction;cell part;cell surface;cell-substrate adherens junction;cell-substrate junction;cytoplasmic membrane-bounded vesicle;cytoplasmic part;cytoplasmic vesicle;endoplasmic reticulum;endoplasmic reticulum lumen;endoplasmic reticulum part;extracellular membrane-bounded organelle;extracellular organelle;extracellular region part;extracellular vesicular ex…	166.164	7.11e-10	380.098	398.632	401.004	532.399	2344.34	1855.76	1574.63	2032.35	183.58	233.46	189.109	152.451	2316.08	1422.73	2357.04	1821.04
+	2.77918	1.19066	2.28256	P16615	Sarcoplasmic/endoplasmic reticulum calcium ATPase 2 OS=Homo sapiens OX=9606 GN=ATP2A2 PE=1 SV=1	ATP2A2	anatomical structure development;biological adhesion;biological regulation;blood coagulation;calcium ion homeostasis;calcium ion transmembrane transport;calcium ion transport;calcium-mediated signaling;cation homeostasis;cation transport;cell adhesion;cellular calcium ion homeostasis;cellular cation homeostasis;cellular chemical homeostasis;cellular divalent inorganic cation homeostasis;cellular …	active transmembrane transporter activity;adenyl nucleotide binding;adenyl ribonucleotide binding;ATP binding;ATPase activity;ATPase activity, coupled;ATPase activity, coupled to movement of substances;ATPase activity, coupled to transmembrane movement of ions;ATPase activity, coupled to transmembrane movement of ions, phosphorylative mechanism;ATPase activity, coupled to transmembrane movement o…	cell part;cytoplasmic part;endoplasmic reticulum;endoplasmic reticulum membrane;endoplasmic reticulum part;integral to membrane;integral to plasma membrane;intracellular membrane-bounded organelle;intracellular organelle;intracellular organelle part;intracellular part;intrinsic to membrane;intrinsic to plasma membrane;longitudinal sarcoplasmic reticulum;membrane;membrane part;membrane-bounded org…	75.0974	0.00123179	362.806	420.514	532.732	391.358	340.74	435.605	614.557	470.387	263.628	137.925	196.245	174.142	433.216	218.146	268.953	359.512
+	2.14235	1.16603	2.24393	P05556	Integrin beta-1 OS=Homo sapiens OX=9606 GN=ITGB1 PE=1 SV=2	ITGB1	actin cytoskeleton organization;actin filament-based process;actomyosin structure organization;anatomical structure homeostasis;anatomical structure morphogenesis;associative learning;axon extension;axon guidance;B cell activation;B cell differentiation;behavior;biological adhesion;biological regulation;blood coagulation;blood vessel endothelial cell migration;calcium ion homeostasis;calcium-inde…	actin binding;binding;cation binding;cell adhesion molecule binding;cytoskeletal protein binding;enzyme binding;ion binding;metal ion binding;peptide binding;protease binding;protein binding;protein dimerization activity;protein heterodimerization activity;receptor activity;viral receptor activity	acrosomal vesicle;adherens junction;alpha10-beta1 integrin complex;alpha11-beta1 integrin complex;alpha1-beta1 integrin complex;alpha2-beta1 integrin complex;alpha3-beta1 integrin complex;alpha7-beta1 integrin complex;alpha8-beta1 integrin complex;alpha9-beta1 integrin complex;anchoring junction;basement membrane;cell division site part;cell junction;cell part;cell projection;cell projection memb…	81.3545	3.59e-06	363.71	341.706	352.371	363.983	28.3459	85.6139	47.6079	47.3483	233.74	187.536	150.403	101.127	11.6103	31.6165	44.789	18.6019
+	1.52121	1.14185	2.20663	P30044	Peroxiredoxin-5, mitochondrial OS=Homo sapiens OX=9606 GN=PRDX5 PE=1 SV=4	PRDX5	biological regulation;biosynthetic process;catabolic process;cellular biosynthetic process;cellular catabolic process;cellular macromolecule metabolic process;cellular metabolic process;cellular nitrogen compound metabolic process;cellular process;cellular response to chemical stimulus;cellular response to hydrogen peroxide;cellular response to oxidative stress;cellular response to reactive oxyge…	antioxidant activity;binding;caspase inhibitor activity;caspase regulator activity;catalytic activity;cysteine-type endopeptidase inhibitor activity;DNA binding;endopeptidase inhibitor activity;endopeptidase regulator activity;enzyme inhibitor activity;enzyme regulator activity;nucleic acid binding;oxidoreductase activity;oxidoreductase activity, acting on paired donors, with incorporation or red…	cell part;cytoplasm;cytoplasmic part;cytoplasmic vesicle;cytosol;extracellular membrane-bounded organelle;extracellular organelle;extracellular region part;extracellular space;extracellular vesicular exosome;intracellular membrane-bounded organelle;intracellular organelle;intracellular organelle lumen;intracellular organelle part;intracellular part;membrane-bounded organelle;membrane-bounded vesi…	54.6395	4.66e-08	21.2397	15.3182	12.8552	16.9343	181.154	368.392	114.941	445.506	9.90605	8.42259	9.80352	3.87293	1299.56	551.638	355.32	514.385
+	3.36987	1.06452	2.09148	P11021	Endoplasmic reticulum chaperone BiP OS=Homo sapiens OX=9606 GN=HSPA5 PE=1 SV=2	HSPA5	activation of signaling protein activity involved in unfolded protein response;anatomical structure arrangement;anatomical structure development;biological regulation;blood coagulation;catabolic process;cell activation;cell communication;cellular catabolic process;cellular macromolecule catabolic process;cellular macromolecule metabolic process;cellular metabolic process;cellular process;cellular…	adenyl nucleotide binding;adenyl ribonucleotide binding;ATP binding;ATPase activity;binding;calcium ion binding;catalytic activity;cation binding;chaperone binding;enzyme binding;glycoprotein binding;hydrolase activity;hydrolase activity, acting on acid anhydrides;hydrolase activity, acting on acid anhydrides, in phosphorus-containing anhydrides;ion binding;metal ion binding;misfolded protein bin…	adherens junction;anchoring junction;cell junction;cell part;cell surface;cell-substrate adherens junction;cell-substrate junction;cytoplasmic membrane-bounded vesicle;cytoplasmic part;cytoplasmic vesicle;endoplasmic reticulum;endoplasmic reticulum chaperone complex;endoplasmic reticulum lumen;endoplasmic reticulum membrane;endoplasmic reticulum part;endoplasmic reticulum-Golgi intermediate compa…	229.539	3.96e-07	752.334	817.812	709.852	695.078	2493.05	2302.33	2352.84	2390.88	338.176	414.98	371.446	322.756	3279.09	1213.2	2587.72	1441.89
+	2.05508	1.01012	2.01408	Q9UL46	Proteasome activator complex subunit 2 OS=Homo sapiens OX=9606 GN=PSME2 PE=1 SV=4	PSME2	activation of immune response;activation of innate immune response;anaphase-promoting complex-dependent proteasomal ubiquitin-dependent protein catabolic process;antigen processing and presentation;antigen processing and presentation of exogenous antigen;antigen processing and presentation of exogenous peptide antigen;antigen processing and presentation of exogenous peptide antigen via MHC class …		cell part;cytoplasmic part;cytosol;extracellular membrane-bounded organelle;extracellular organelle;extracellular region part;extracellular vesicular exosome;intracellular organelle part;intracellular part;macromolecular complex;membrane;membrane-bounded organelle;membrane-bounded vesicle;nuclear part;nucleoplasm;organelle;organelle part;proteasome activator complex;proteasome complex;protein com…	38.2922	0.00625195	79.0303	77.9708	82.1797	88.4708	869.451	98.9104	127.6	431.744	25.2626	37.0813	50.0439	61.5865	87.6879	428.036	154.959	222.594
+	1.86165	0.958181	1.94286	P07737	Profilin-1 OS=Homo sapiens OX=9606 GN=PFN1 PE=1 SV=2	PFN1	actin cytoskeleton organization;actin filament-based process;anatomical structure formation involved in morphogenesis;biological regulation;blood coagulation;cell activation;cellular component organization;cellular component organization at cellular level;cellular component organization or biogenesis;cellular component organization or biogenesis at cellular level;cellular process;cellular respons…	actin binding;actin monomer binding;adenyl nucleotide binding;adenyl-nucleotide exchange factor activity;ATPase regulator activity;binding;cytoskeletal protein binding;enzyme regulator activity;lipid binding;nucleoside-triphosphatase regulator activity;nucleotide binding;phosphatidylinositol binding;phosphatidylinositol-4,5-bisphosphate binding;phospholipid binding;proline-rich region binding;pro…	adherens junction;anchoring junction;blood microparticle;cell cortex;cell junction;cell part;cell projection;cell-substrate adherens junction;cell-substrate junction;cytoplasm;cytoplasmic part;cytoskeleton;cytosol;extracellular membrane-bounded organelle;extracellular organelle;extracellular region part;extracellular vesicular exosome;focal adhesion;intracellular membrane-bounded organelle;intrac…	43.1117	1.99e-07	18.1412	24.7765	40.5673	38.6732	563.1	437.408	83.2706	579.857	16.6682	18.3706	13.3934	12.7972	2816.57	1158.21	1411.03	1009.62
+	2.32711	0.932787	1.90896	P19012	Keratin, type I cytoskeletal 15 OS=Homo sapiens OX=9606 GN=KRT15 PE=1 SV=3	KRT15	anatomical structure development;developmental process;epidermis development;tissue development	binding;protein binding;scaffold protein binding;structural constituent of cytoskeleton;structural molecule activity	cell part;cytoskeletal part;extracellular membrane-bounded organelle;extracellular organelle;extracellular region part;extracellular vesicular exosome;intermediate filament;intracellular membrane-bounded organelle;intracellular organelle;intracellular organelle part;intracellular part;macromolecular complex;membrane-bounded organelle;membrane-bounded vesicle;nucleus;organelle;organelle part;prote…	85.6333	8.26e-06	364.258	367.56	350.876	368.596	239.321	163.283	127.315	179.148	222.823	210.559	215.374	136.841	96.0035	122.546	108.901	83.5617
+	2.1086	0.905132	1.87272	Q14451	Growth factor receptor-bound protein 7 OS=Homo sapiens OX=9606 GN=GRB7 PE=1 SV=2	GRB7	biological regulation;blood coagulation;cell migration;cell motility;cell surface receptor linked signaling pathway;cellular component assembly;cellular component assembly at cellular level;cellular component movement;cellular component organization;cellular component organization at cellular level;cellular component organization or biogenesis;cellular component organization or biogenesis at cell…	binding;binding, bridging;enzyme binding;identical protein binding;kinase binding;lipid binding;nucleic acid binding;phosphatidylinositol binding;phospholipid binding;protein binding;protein binding, bridging;protein kinase binding;RNA binding;SH3/SH2 adaptor activity;signaling adaptor activity	adherens junction;anchoring junction;cell junction;cell part;cell projection;cell-substrate adherens junction;cell-substrate junction;cytoplasmic part;cytosol;focal adhesion;intracellular non-membrane-bounded organelle;intracellular organelle;intracellular part;macromolecular complex;membrane;non-membrane-bounded organelle;organelle;plasma membrane;ribonucleoprotein complex;RNA granule;stress gra…	95.856	2.49e-07	48.7949	36.2432	38.3606	32.3819	640.57	1490	397.149	551.689	23.3392	21.4344	24.2806	15.5932	150.148	112.669	45.33	75.985
+	3.13754	0.900253	1.86639	P62258	14-3-3 protein epsilon OS=Homo sapiens OX=9606 GN=YWHAE PE=1 SV=1	YWHAE	anatomical structure development;apoptosis;biological regulation;biosynthetic process;cell cycle;cell cycle process;cell death;cell migration;cell motility;cell surface receptor linked signaling pathway;cellular biosynthetic process;cellular chemical homeostasis;cellular component movement;cellular component organization;cellular component organization at cellular level;cellular component organiz…	amine binding;amino acid binding;antigen binding;binding;carboxylic acid binding;channel regulator activity;enzyme binding;histone deacetylase binding;ion channel binding;MHC class II protein complex binding;MHC protein complex binding;phosphoprotein binding;phosphoserine binding;potassium channel regulator activity;protein binding;protein dimerization activity;protein heterodimerization activity…	adherens junction;anchoring junction;axon;cell junction;cell part;cell projection;cell-substrate adherens junction;cell-substrate junction;cytoplasmic membrane-bounded vesicle;cytoplasmic part;cytoplasmic vesicle;cytoplasmic vesicle membrane;cytoplasmic vesicle part;cytoskeletal part;cytosol;extracellular membrane-bounded organelle;extracellular organelle;extracellular region part;extracellular v…	80.3515	4.65e-08	143.087	169.31	170.677	169.356	343.799	238.869	208.742	316.245	81.2317	74.5795	83.1128	121.54	733.019	521.023	705.918	528.534
+	2.57321	0.891567	1.85519	P47895	Aldehyde dehydrogenase family 1 member A3 OS=Homo sapiens OX=9606 GN=ALDH1A3 PE=1 SV=2	ALDH1A3	anatomical structure development;anatomical structure morphogenesis;apocarotenoid metabolic process;behavior;biological regulation;biosynthetic process;carboxylic acid metabolic process;cellular aldehyde metabolic process;cellular biosynthetic process;cellular hormone metabolic process;cellular ketone metabolic process;cellular lipid metabolic process;cellular metabolic process;cellular process;d…	aldehyde dehydrogenase (NAD) activity;aldehyde dehydrogenase [NAD(P)+] activity;binding;catalytic activity;coenzyme binding;cofactor binding;hormone binding;identical protein binding;NAD binding;NAD+ binding;nucleotide binding;oxidoreductase activity;oxidoreductase activity, acting on the aldehyde or oxo group of donors;oxidoreductase activity, acting on the aldehyde or oxo group of donors, NAD o…	cell part;cytoplasm;cytoplasmic part;cytosol;extracellular membrane-bounded organelle;extracellular organelle;extracellular region part;extracellular vesicular exosome;intracellular part;membrane-bounded organelle;membrane-bounded vesicle;organelle;vesicle	143.718	2.15e-06	812.264	846.611	910.04	899.486	301.342	398.987	391.833	367.323	514.647	539.703	513.918	353.033	328.038	224.661	177.93	185.912
+	4.10426	0.787141	1.72565	P21333	Filamin-A OS=Homo sapiens OX=9606 GN=FLNA PE=1 SV=4	FLNA	actin crosslink formation;actin cytoskeleton organization;actin cytoskeleton reorganization;actin filament organization;actin filament-based process;anatomical structure formation involved in morphogenesis;anatomical structure morphogenesis;biological adhesion;biological regulation;biosynthetic process;blood coagulation;cAMP-mediated signaling;cell activation;cell adhesion;cell cycle process;cell…	actin binding;actin filament binding;binding;cytoskeletal protein binding;enzyme binding;Fc-gamma receptor I complex binding;glycoprotein binding;GTPase binding;identical protein binding;immunoglobulin receptor binding;molecular transducer activity;protein binding;protein dimerization activity;protein homodimerization activity;Rac GTPase binding;Ral GTPase binding;Ras GTPase binding;receptor bind…	actin cytoskeleton;actin filament;adherens junction;anchoring junction;cell body;cell cortex part;cell junction;cell part;cell projection part;cell-substrate adherens junction;cell-substrate junction;chromosomal part;cortical cytoskeleton;cytoplasm;cytoplasmic part;cytoskeletal part;cytoskeleton;cytosol;dendritic shaft;extracellular membrane-bounded organelle;extracellular organelle;extracellular…	911.803	6.09e-07	12226	11542.1	14753.2	15577.2	3973	4247.01	3369.97	5266.74	7642.9	7906.44	8283.71	7747.42	6472.94	6789.98	8789.57	8067.52
+	2.59812	0.779224	1.71621	P09382	Galectin-1 OS=Homo sapiens OX=9606 GN=LGALS1 PE=1 SV=2	LGALS1	apoptosis;B cell activation;B cell activation involved in immune response;B cell differentiation;biological regulation;carbohydrate homeostasis;cell activation;cell activation involved in immune response;cell death;cell differentiation;cellular chemical homeostasis;cellular developmental process;cellular glucose homeostasis;cellular homeostasis;cellular process;cellular response to carbohydrate s…	binding;carbohydrate binding;disaccharide binding;galactoside binding;lactose binding;molecular transducer activity;monosaccharide binding;signal transducer activity;sugar binding	cell part;cell surface;cytoplasm;extracellular matrix;extracellular membrane-bounded organelle;extracellular organelle;extracellular region part;extracellular space;extracellular vesicular exosome;intracellular;intracellular membrane-bounded organelle;intracellular organelle;intracellular part;membrane-bounded organelle;membrane-bounded vesicle;nucleus;organelle;proteinaceous extracellular matrix…	56.1111	0.0026941	805.677	821.946	788.908	795.456	67.5829	324.147	310.465	284.711	505.436	516.986	508.331	382.444	345.819	108.948	258.358	130.327
+	4.10858	0.755016	1.68765	P39023;Q92901	60S ribosomal protein L3 OS=Homo sapiens OX=9606 GN=RPL3 PE=1 SV=2	RPL3;RPL3L	biosynthetic process;catabolic process;cellular biosynthetic process;cellular catabolic process;cellular component disassembly;cellular component disassembly at cellular level;cellular component organization;cellular component organization at cellular level;cellular component organization or biogenesis;cellular component organization or biogenesis at cellular level;cellular macromolecular complex…	binding;nucleic acid binding;RNA binding;structural constituent of ribosome;structural molecule activity	adherens junction;anchoring junction;cell junction;cell part;cell-substrate adherens junction;cell-substrate junction;cytoplasm;cytoplasmic part;cytosol;cytosolic large ribosomal subunit;extracellular membrane-bounded organelle;extracellular organelle;extracellular region part;extracellular vesicular exosome;focal adhesion;intracellular membrane-bounded organelle;intracellular non-membrane-bounde…	89.4977	0.00047406	164.024	174.936	178.024	167.116	741.798	3318.73	620.937	506.6	98.1197	103.432	108.917	100.957	455.009	541.726	997.562	183.763
+	2.82581	0.726377	1.65448	P23381	Tryptophan--tRNA ligase, cytoplasmic OS=Homo sapiens OX=9606 GN=WARS PE=1 SV=2	WARS	amine metabolic process;amino acid activation;anatomical structure formation involved in morphogenesis;angiogenesis;biological regulation;biosynthetic process;carboxylic acid metabolic process;cellular amine metabolic process;cellular amino acid metabolic process;cellular biosynthetic process;cellular ketone metabolic process;cellular macromolecule biosynthetic process;cellular macromolecule meta…	adenyl nucleotide binding;adenyl ribonucleotide binding;aminoacyl-tRNA ligase activity;ATP binding;binding;catalytic activity;ligase activity;ligase activity, forming aminoacyl-tRNA and related compounds;ligase activity, forming carbon-oxygen bonds;nucleotide binding;purine nucleotide binding;purine ribonucleoside triphosphate binding;purine ribonucleotide binding;ribonucleotide binding;tryptopha…	cell part;cytoplasm;cytoplasmic part;cytosol;extracellular membrane-bounded organelle;extracellular organelle;extracellular region part;extracellular vesicular exosome;intracellular membrane-bounded organelle;intracellular organelle;intracellular part;membrane-bounded organelle;membrane-bounded vesicle;nucleus;organelle;vesicle	33.6892	0.00916118	50.3773	44.7722	40.0338	43.0905	113.172	71.3281	85.8684	168.314	27.3973	24.6281	25.212	32.3704	218.306	31.6724	442.769	104.5
+	2.63407	-0.810917	0.570019	O60701	UDP-glucose 6-dehydrogenase OS=Homo sapiens OX=9606 GN=UGDH PE=1 SV=1	UGDH	alcohol metabolic process;amine metabolic process;aminoglycan biosynthetic process;aminoglycan metabolic process;anatomical structure morphogenesis;biosynthetic process;carbohydrate biosynthetic process;carbohydrate metabolic process;carboxylic acid biosynthetic process;carboxylic acid metabolic process;cellular biosynthetic process;cellular carbohydrate metabolic process;cellular glucuronidation…	binding;catalytic activity;coenzyme binding;cofactor binding;electron carrier activity;NAD binding;nucleotide binding;oxidoreductase activity;oxidoreductase activity, acting on CH-OH group of donors;oxidoreductase activity, acting on the CH-OH group of donors, NAD or NADP as acceptor;UDP-glucose 6-dehydrogenase activity	cell part;cytoplasmic part;cytosol;extracellular membrane-bounded organelle;extracellular organelle;extracellular region part;extracellular vesicular exosome;intracellular organelle part;intracellular part;membrane-bounded organelle;membrane-bounded vesicle;nuclear part;nucleoplasm;organelle;organelle part;vesicle	10.5396	0.00199137	43.6003	32.9854	35.4449	36.6392	97.7549	46.8228	42.9005	47.1921	78.7962	52.0343	61.8579	73.9694	10.2987	25.7067	4.53333	26.0682
+	3.56167	-0.855896	0.552522	P07099	Epoxide hydrolase 1 OS=Homo sapiens OX=9606 GN=EPHX1 PE=1 SV=1	EPHX1	aromatic compound catabolic process;catabolic process;cellular aromatic compound metabolic process;cellular catabolic process;cellular metabolic process;cellular process;metabolic process;response to chemical stimulus;response to organic cyclic compound;response to organic substance;response to stimulus;response to toxin	catalytic activity;cis-stilbene-oxide hydrolase activity;epoxide hydrolase activity;ether hydrolase activity;hydrolase activity;hydrolase activity, acting on ether bonds	cell part;cytoplasmic part;endoplasmic reticulum membrane;endoplasmic reticulum part;integral to membrane;intracellular organelle part;intracellular part;intrinsic to membrane;membrane;membrane part;organelle membrane;organelle part	23.2766	0.0176237	39.1596	39.0778	40.3614	44.0808	189.824	274.02	96.7609	216.001	65.9376	64.1317	80.8296	90.6356	346.848	159.495	38.6468	53.3284
+	3.63734	-0.922532	0.527582	Q9Y365	START domain-containing protein 10 OS=Homo sapiens OX=9606 GN=STARD10 PE=1 SV=2	STARD10	acid secretion;bile acid secretion;biological regulation;establishment of localization;positive regulation of biological process;positive regulation of cell communication;positive regulation of cellular process;positive regulation of peroxisome proliferator activated receptor signaling pathway;positive regulation of response to stimulus;positive regulation of signal transduction;positive regulati…	binding;lipid binding	cell junction;cell part;cell projection;cell-cell junction;cytoplasmic part;cytosol;intercellular canaliculus;intracellular part;membrane;microvillus	5.1698	0.00105963	65.4905	68.3366	67.5895	70.6641	70.8032	16.8569	18.2101	23.6269	148.437	113.794	112.01	154.639	38.6677	77.4238	31.3889	65.5962
+	3.70892	-0.949335	0.517871	Q8NC51	Plasminogen activator inhibitor 1 RNA-binding protein OS=Homo sapiens OX=9606 GN=SERBP1 PE=1 SV=2	SERBP1	biological regulation;cellular macromolecule metabolic process;cellular metabolic process;cellular nitrogen compound metabolic process;cellular process;macromolecule metabolic process;metabolic process;mRNA metabolic process;nitrogen compound metabolic process;nucleic acid metabolic process;nucleobase-containing compound metabolic process;posttranscriptional regulation of gene expression;primary …	binding;mRNA 3'-UTR binding;mRNA binding;nucleic acid binding;RNA binding	cell part;cytoplasm;cytoplasmic part;extracellular membrane-bounded organelle;extracellular organelle;extracellular region part;extracellular vesicular exosome;intracellular membrane-bounded organelle;intracellular organelle;intracellular part;membrane;membrane-bounded organelle;membrane-bounded vesicle;nucleus;organelle;perinuclear region of cytoplasm;plasma membrane;vesicle	16.2898	7.8e-05	39.3342	42.0305	35.777	35.5981	162.373	138.009	187.573	163.527	76.0958	72.5353	73.8526	76.1541	157.825	101.043	44.9275	111.824
+	3.3481	-0.999483	0.500179	Q14697	Neutral alpha-glucosidase AB OS=Homo sapiens OX=9606 GN=GANAB PE=1 SV=3	GANAB	carbohydrate metabolic process;cellular carbohydrate metabolic process;cellular macromolecule metabolic process;cellular metabolic process;cellular process;cellular protein metabolic process;glycosylation;macromolecule glycosylation;macromolecule metabolic process;macromolecule modification;metabolic process;peptidyl-amino acid modification;peptidyl-asparagine modification;post-translational prot…	alpha-glucosidase activity;binding;carbohydrate binding;catalytic activity;glucan 1,3-alpha-glucosidase activity;glucosidase activity;hydrolase activity;hydrolase activity, acting on glycosyl bonds;hydrolase activity, hydrolyzing O-glycosyl compounds	cell part;cytoplasmic membrane-bounded vesicle;cytoplasmic part;cytoplasmic vesicle;endoplasmic reticulum lumen;endoplasmic reticulum part;extracellular membrane-bounded organelle;extracellular organelle;extracellular region part;extracellular vesicular exosome;glucosidase II complex;Golgi apparatus;intracellular membrane-bounded organelle;intracellular organelle;intracellular organelle lumen;int…	186.286	2.72e-07	487.513	574.696	530.016	531.429	1467.55	1793.3	1951.66	1623.52	1111.68	1124.8	1172.17	912.231	3630.64	1793.07	3721.56	2724.45
+	1.42091	-1.02889	0.490088	Q9H4M7	Pleckstrin homology domain-containing family A member 4 OS=Homo sapiens OX=9606 GN=PLEKHA4 PE=1 SV=2	PLEKHA4		1-phosphatidylinositol binding;binding;lipid binding;phosphatidylinositol binding;phospholipid binding	cell part;cytoplasm;intracellular part;membrane	4.4324	0.0245944	9.70406	11.7938	8.07385	9.53808	0	5.22227	4.69246	5.96391	18.2237	10.1884	27.3041	31.9574	7.2723	0.144509	0	7.74054
+	4.37147	-1.11223	0.462577	P17980	26S proteasome regulatory subunit 6A OS=Homo sapiens OX=9606 GN=PSMC3 PE=1 SV=3	PSMC3	activation of immune response;activation of innate immune response;anaphase-promoting complex-dependent proteasomal ubiquitin-dependent protein catabolic process;anatomical structure development;antigen processing and presentation;antigen processing and presentation of exogenous antigen;antigen processing and presentation of exogenous peptide antigen;antigen processing and presentation of exogeno…	adenyl nucleotide binding;adenyl ribonucleotide binding;ATP binding;ATPase activity;binding;catalytic activity;hydrolase activity;hydrolase activity, acting on acid anhydrides;hydrolase activity, acting on acid anhydrides, in phosphorus-containing anhydrides;nucleoside-triphosphatase activity;nucleotide binding;protein binding;protein binding transcription factor activity;purine nucleotide bindin…	cell part;cytoplasmic mRNA processing body;cytoplasmic part;cytosol;cytosolic part;cytosolic proteasome complex;intracellular membrane-bounded organelle;intracellular non-membrane-bounded organelle;intracellular organelle;intracellular organelle part;intracellular part;macromolecular complex;membrane;membrane-bounded organelle;non-membrane-bounded organelle;nuclear part;nuclear proteasome complex…	24.2001	1.4e-05	15686.4	15837.5	16872.3	18370	0.136427	97.8207	3.18653	51.909	43040.3	31999.5	34310.9	37739.6	8.26945	105.852	0.377699	113.183
+	1.9438	-1.16841	0.444912	P00505	Aspartate aminotransferase, mitochondrial OS=Homo sapiens OX=9606 GN=GOT2 PE=1 SV=3	GOT2	2-oxoglutarate metabolic process;4-hydroxyproline catabolic process;4-hydroxyproline metabolic process;alcohol biosynthetic process;alcohol metabolic process;amine biosynthetic process;amine catabolic process;amine metabolic process;aspartate biosynthetic process;aspartate catabolic process;aspartate family amino acid biosynthetic process;aspartate family amino acid catabolic process;aspartate fa…	binding;catalytic activity;cofactor binding;kynurenine-oxoglutarate transaminase activity;L-aspartate:2-oxoglutarate aminotransferase activity;L-phenylalanine aminotransferase activity;L-phenylalanine:2-oxoglutarate aminotransferase activity;pyridoxal phosphate binding;transaminase activity;transferase activity;transferase activity, transferring nitrogenous groups;vitamin B6 binding;vitamin bindi…	cell part;cytoplasmic part;extracellular membrane-bounded organelle;extracellular organelle;extracellular region part;extracellular vesicular exosome;intracellular membrane-bounded organelle;intracellular organelle;intracellular organelle lumen;intracellular organelle part;intracellular part;membrane;membrane-bounded organelle;membrane-bounded vesicle;membrane-enclosed lumen;mitochondrial inner m…	67.1881	7.6e-09	21.8102	23.5205	22.3033	19.3257	342.838	413.854	635.543	430.967	46.668	26.7603	69.6004	68.8465	428.089	1019.8	677.139	517.958
+	3.23603	-1.23214	0.425685	Q00889	Pregnancy-specific beta-1-glycoprotein 6 OS=Homo sapiens OX=9606 GN=PSG6 PE=2 SV=1	PSG6	female pregnancy;multi-organism process;reproductive process		extracellular region	10.2112	0.0335097	36.7737	42.4086	45.6854	50.7145	0	22.0919	24.0116	23.0188	76.0607	94.9181	118.669	136.204	18.7399	59.3727	98.5335	49.1231
+	4.31663	-1.2343	0.42505	Q9NVA2	Septin-11 OS=Homo sapiens OX=9606 GN=SEPTIN11 PE=1 SV=3	44085	cell cycle;cell division;cellular component assembly;cellular component organization;cellular component organization or biogenesis;cellular process;macromolecular complex assembly;macromolecular complex subunit organization;protein complex assembly;protein complex subunit organization;protein heterooligomerization;protein oligomerization	binding;GTP binding;guanyl nucleotide binding;guanyl ribonucleotide binding;nucleotide binding;purine nucleotide binding;purine ribonucleoside triphosphate binding;purine ribonucleotide binding;ribonucleotide binding	actin filament bundle;actomyosin;axon;cell junction;cell part;cell projection;cell projection part;cytoplasm;cytoskeletal part;dendritic spine;extracellular membrane-bounded organelle;extracellular organelle;extracellular region part;extracellular vesicular exosome;intracellular organelle part;intracellular part;membrane-bounded organelle;membrane-bounded vesicle;neuron projection;neuron spine;or…	20.0563	0.00076255	51.886	49.5664	53.0507	63.9949	16.2515	41.7952	44.4835	59.6518	132.985	122.055	108.826	160.588	34.4966	64.9783	39.8964	45.6318
+	2.44337	-1.23848	0.423818	P62937	Peptidyl-prolyl cis-trans isomerase A OS=Homo sapiens OX=9606 GN=PPIA PE=1 SV=2	PPIA	biological regulation;biosynthetic process;blood coagulation;cell activation;cell migration;cell motility;cellular biosynthetic process;cellular component assembly;cellular component assembly at cellular level;cellular component movement;cellular component organization;cellular component organization at cellular level;cellular component organization or biogenesis;cellular component organization o…	binding;catalytic activity;cis-trans isomerase activity;isomerase activity;peptide binding;peptidyl-prolyl cis-trans isomerase activity;protein binding;unfolded protein binding;virion binding	adherens junction;anchoring junction;cell junction;cell part;cell-substrate adherens junction;cell-substrate junction;cytoplasmic part;cytosol;extracellular membrane-bounded organelle;extracellular organelle;extracellular region;extracellular region part;extracellular space;extracellular vesicular exosome;focal adhesion;intracellular membrane-bounded organelle;intracellular organelle;intracellula…	57.5832	0.000227957	64.5371	65.4436	66.3496	59.1109	1600.66	173.546	85.6735	458.059	116.574	110.22	160.834	263.459	2530.05	1155.3	2522.81	993.229
+	5.61798	-1.2465	0.421471	Q12792	Twinfilin-1 OS=Homo sapiens OX=9606 GN=TWF1 PE=1 SV=3	TWF1	biological regulation;cellular component organization;cellular component organization or biogenesis;maintenance of location;maintenance of protein location;negative regulation of actin filament polymerization;negative regulation of biological process;negative regulation of cellular component organization;negative regulation of cellular process;negative regulation of cytoskeleton organization;nega…	actin binding;actin monomer binding;adenyl nucleotide binding;adenyl ribonucleotide binding;ATP binding;binding;cytoskeletal protein binding;lipid binding;nucleotide binding;phosphatidylinositol binding;phosphatidylinositol-4,5-bisphosphate binding;phospholipid binding;protein binding;purine nucleotide binding;purine ribonucleoside triphosphate binding;purine ribonucleotide binding;ribonucleotide…	actin cytoskeleton;adherens junction;anchoring junction;cell junction;cell part;cell projection;cell-cell junction;cell-substrate adherens junction;cell-substrate junction;contractile fiber;cytoplasm;cytoplasmic part;cytoskeleton;filopodium;focal adhesion;intracellular non-membrane-bounded organelle;intracellular organelle;intracellular part;myofibril;non-membrane-bounded organelle;organelle;peri…	29.8369	1.91e-05	645.86	625.133	654.473	590.86	223.832	165.628	376.76	50.073	1467.18	1572.14	1489.76	1526.92	23.2237	124.627	94.3857	55.347
+	3.88345	-1.30991	0.403347	P40926	Malate dehydrogenase, mitochondrial OS=Homo sapiens OX=9606 GN=MDH2 PE=1 SV=3	MDH2	acetyl-CoA catabolic process;acetyl-CoA metabolic process;alcohol biosynthetic process;alcohol metabolic process;biosynthetic process;carbohydrate biosynthetic process;carbohydrate metabolic process;carboxylic acid metabolic process;catabolic process;cellular biosynthetic process;cellular carbohydrate biosynthetic process;cellular carbohydrate metabolic process;cellular catabolic process;cellular…	catalytic activity;L-malate dehydrogenase activity;malate dehydrogenase (NADP+) activity;malate dehydrogenase activity;oxidoreductase activity;oxidoreductase activity, acting on CH-OH group of donors;oxidoreductase activity, acting on the CH-OH group of donors, NAD or NADP as acceptor	cell part;cytoplasmic part;extracellular membrane-bounded organelle;extracellular organelle;extracellular region part;extracellular vesicular exosome;intracellular membrane-bounded organelle;intracellular organelle;intracellular organelle lumen;intracellular organelle part;intracellular part;membrane;membrane-bounded organelle;membrane-bounded vesicle;membrane-enclosed lumen;mitochondrial inner m…	107.235	0.0298234	1152.67	1303.66	1215.15	1371.91	1905.12	1057.84	898.067	1523.07	2510.06	3600.52	3471.69	3198.97	511.816	1983.28	188.221	1655.23
+	6.98849	-1.32682	0.398647	Q08J23	tRNA (cytosine(34)-C(5))-methyltransferase OS=Homo sapiens OX=9606 GN=NSUN2 PE=1 SV=2	NSUN2	cell cycle phase;cell cycle process;cell division;cellular component organization;cellular component organization at cellular level;cellular component organization or biogenesis;cellular component organization or biogenesis at cellular level;cellular macromolecule metabolic process;cellular metabolic process;cellular nitrogen compound metabolic process;cellular process;macromolecule metabolic pro…	binding;catalytic activity;methyltransferase activity;nucleic acid binding;RNA binding;RNA methyltransferase activity;S-adenosylmethionine-dependent methyltransferase activity;transferase activity;transferase activity, transferring one-carbon groups;tRNA (cytosine) methyltransferase activity;tRNA (cytosine-5-)-methyltransferase activity;tRNA binding;tRNA methyltransferase activity	cell part;cytoplasm;cytoskeletal part;intracellular membrane-bounded organelle;intracellular non-membrane-bounded organelle;intracellular organelle;intracellular organelle part;intracellular part;membrane-bounded organelle;non-membrane-bounded organelle;nuclear part;nucleolus;nucleus;organelle;organelle part;spindle	32.2877	0.0458831	86.7403	84.5916	101.471	100.954	178.266	124.819	109.526	72.1347	242.017	218.107	227.028	263.363	92.2549	247.643	36.5162	21.1194
+	4.7125	-1.38025	0.384154	Q09666	Neuroblast differentiation-associated protein AHNAK OS=Homo sapiens OX=9606 GN=AHNAK PE=1 SV=2	AHNAK	biological regulation;cellular component assembly;cellular component organization;cellular component organization or biogenesis;macromolecular complex assembly;macromolecular complex subunit organization;protein complex assembly;protein complex subunit organization;protein oligomerization;regulation of biological process;regulation of cellular metabolic process;regulation of cellular process;regu…		actin cytoskeleton;adherens junction;anchoring junction;cell junction;cell part;cell-cell contact zone;cell-cell junction;cell-substrate adherens junction;cell-substrate junction;contractile fiber part;costamere;cytoplasm;cytoplasmic part;cytoskeleton;cytosol;extracellular membrane-bounded organelle;extracellular organelle;extracellular region part;extracellular vesicular exosome;focal adhesion;i…	322.966	1.41e-06	917.858	941.852	869.678	892.693	747.873	578.865	586.99	478.509	2628.55	2322.75	2399.85	2230.42	707.616	743.365	535.068	1178.08
+	2.71176	-1.46567	0.362069	P26641	Elongation factor 1-gamma OS=Homo sapiens OX=9606 GN=EEF1G PE=1 SV=3	EEF1G	biosynthetic process;cellular biosynthetic process;cellular macromolecule biosynthetic process;cellular macromolecule metabolic process;cellular metabolic process;cellular process;cellular protein metabolic process;gene expression;macromolecule biosynthetic process;macromolecule metabolic process;metabolic process;multi-organism process;primary metabolic process;protein metabolic process;response…	binding;nucleic acid binding;RNA binding;translation elongation factor activity;translation factor activity, nucleic acid binding	cell part;cytoplasm;cytoplasmic part;cytosol;extracellular membrane-bounded organelle;extracellular organelle;extracellular region part;extracellular vesicular exosome;intracellular membrane-bounded organelle;intracellular organelle;intracellular part;membrane;membrane-bounded organelle;membrane-bounded vesicle;nucleus;organelle;vesicle	103.668	0.00223277	105.949	99.5768	219.921	205.808	819.292	670.367	433.888	375.15	380.504	479.727	444.613	363.057	234.447	157.308	32.5561	133.175
+	4.24251	-1.48419	0.357449	Q96B97	SH3 domain-containing kinase-binding protein 1 OS=Homo sapiens OX=9606 GN=SH3KBP1 PE=1 SV=2	SH3KBP1	apoptosis;biological regulation;cell communication;cell death;cell migration;cell motility;cell surface receptor linked signaling pathway;cell-cell signaling;cellular component movement;cellular component organization;cellular component organization at cellular level;cellular component organization or biogenesis;cellular component organization or biogenesis at cellular level;cellular membrane org…		adherens junction;anchoring junction;cell junction;cell part;cell projection;cell-cell junction;cell-substrate adherens junction;cell-substrate junction;cytoplasmic part;cytoplasmic vesicle membrane;cytoplasmic vesicle part;cytoskeleton;cytosol;focal adhesion;intracellular non-membrane-bounded organelle;intracellular organelle;intracellular organelle part;intracellular part;membrane;neuron projec…	14.0294	0.0387678	15.7898	19.7153	20.9969	20.4721	16.441	70.8632	215.11	63.5631	57.1154	50.7463	63.3898	47.3103	39.7615	51.2532	179.227	90.0718
+	1.42779	-1.54856	0.341852	P84243	Histone H3.3 OS=Homo sapiens OX=9606 GN=H3F3A PE=1 SV=2	H3F3A	biological regulation;blood coagulation;cellular component assembly;cellular component assembly at cellular level;cellular component organization;cellular component organization at cellular level;cellular component organization or biogenesis;cellular component organization or biogenesis at cellular level;cellular macromolecular complex assembly;cellular macromolecular complex subunit organization…	binding;chromatin binding;chromatin DNA binding;core promoter binding;core promoter sequence-specific DNA binding;DNA binding;enhancer binding;enhancer sequence-specific DNA binding;histone binding;nucleic acid binding;nucleosomal DNA binding;nucleosome binding;protein binding;regulatory region DNA binding;regulatory region nucleic acid binding;RNA polymerase II core promoter sequence-specific DN…	cell part;chromosomal part;chromosome;extracellular membrane-bounded organelle;extracellular organelle;extracellular region;extracellular region part;extracellular vesicular exosome;intracellular membrane-bounded organelle;intracellular non-membrane-bounded organelle;intracellular organelle;intracellular organelle part;intracellular part;macromolecular complex;membrane-bounded organelle;membrane-…	77.5279	1.66e-06	1.56117	0.281762	1.51768	0.537435	33.9629	256.414	16.053	20.879	2.21115	2.51113	2.57915	0	195.146	176.36	523.1	216.801
+	1.31049	-1.58154	0.334126	P34897	Serine hydroxymethyltransferase, mitochondrial OS=Homo sapiens OX=9606 GN=SHMT2 PE=1 SV=3	SHMT2	amine biosynthetic process;amine metabolic process;biological regulation;biosynthetic process;carboxylic acid biosynthetic process;carboxylic acid metabolic process;cellular amine metabolic process;cellular amino acid biosynthetic process;cellular amino acid metabolic process;cellular aromatic compound metabolic process;cellular biosynthetic process;cellular component assembly;cellular component …	aldehyde-lyase activity;amine binding;amino acid binding;binding;carbon-carbon lyase activity;carboxylic acid binding;catalytic activity;chromatin binding;cofactor binding;glycine hydroxymethyltransferase activity;hydroxymethyl-, formyl- and related transferase activity;L-allo-threonine aldolase activity;lyase activity;pyridoxal phosphate binding;threonine aldolase activity;transferase activity;t…	cell part;cytoplasmic part;cytoskeleton;extracellular membrane-bounded organelle;extracellular organelle;extracellular region part;extracellular vesicular exosome;intracellular membrane-bounded organelle;intracellular non-membrane-bounded organelle;intracellular organelle;intracellular organelle lumen;intracellular organelle part;intracellular part;membrane;membrane-bounded organelle;membrane-bou…	67.0463	7.96e-07	6.53259	16.3301	12.217	4.65525	75.1463	275.333	138.222	143.902	33.2754	9.68729	37.2373	43.0059	857.804	417.452	454.961	662.577
+	2.61239	-1.61607	0.326223	P05141	ADP/ATP translocase 2 OS=Homo sapiens OX=9606 GN=SLC25A5 PE=1 SV=7	SLC25A5	adenine transport;biological regulation;cellular metabolic process;cellular process;chromosome segregation;energy derivation by oxidation of organic compounds;energy reserve metabolic process;establishment of localization;generation of precursor metabolites and energy;metabolic process;nitrogen compound transport;nucleobase transport;nucleobase-containing compound transport;oxidation-reduction pr…	adenine transmembrane transporter activity;binding;enzyme binding;nucleobase transmembrane transporter activity;nucleobase-containing compound transmembrane transporter activity;protein binding;purine base transmembrane transporter activity;substrate-specific transmembrane transporter activity;substrate-specific transporter activity;transmembrane transporter activity;transporter activity;ubiquiti…	cell part;cytoplasmic part;cytoskeletal part;extracellular membrane-bounded organelle;extracellular organelle;extracellular region part;extracellular vesicular exosome;integral to membrane;integral to plasma membrane;intracellular membrane-bounded organelle;intracellular non-membrane-bounded organelle;intracellular organelle;intracellular organelle part;intracellular part;intrinsic to membrane;in…	121.807	0.000235073	121.207	95.0928	111.957	117.132	899.218	349.087	590.734	383.819	362.194	423.493	468.694	196.859	4562.25	2396.53	412.013	2274.63
+	6.07928	-1.69974	0.307841	P27816	Microtubule-associated protein 4 OS=Homo sapiens OX=9606 GN=MAP4 PE=1 SV=3	MAP4	cell cycle process;cell division;cellular component movement;cellular component organization;cellular component organization at cellular level;cellular component organization or biogenesis;cellular component organization or biogenesis at cellular level;cellular process;cytoskeleton organization;establishment of localization;establishment of localization in cell;establishment of organelle localiza…	structural molecule activity	cell part;cytoplasm;cytoskeletal part;cytoskeleton;extracellular membrane-bounded organelle;extracellular organelle;extracellular region part;extracellular vesicular exosome;intracellular non-membrane-bounded organelle;intracellular organelle;intracellular organelle part;intracellular part;macromolecular complex;membrane;membrane-bounded organelle;membrane-bounded vesicle;microtubule;microtubule …	110.07	1.93e-06	653.598	643.279	680.78	670.932	390.971	591.599	816.848	784.518	2202.53	2017.93	2399.77	2126.11	673.765	630.591	434.988	657.606
+	3.80992	-1.7293	0.301598	P42167	Lamina-associated polypeptide 2, isoforms beta/gamma OS=Homo sapiens OX=9606 GN=TMPO PE=1 SV=2	TMPO		binding;DNA binding;lamin binding;nucleic acid binding;protein binding	cell part;cytoplasm;envelope;integral to membrane;intracellular membrane-bounded organelle;intracellular organelle;intracellular organelle part;intracellular part;intrinsic to membrane;membrane;membrane part;membrane-bounded organelle;nuclear envelope;nuclear inner membrane;nuclear membrane;nuclear part;nucleus;organelle;organelle envelope;organelle inner membrane;organelle membrane;organelle part	99.4139	0.00485408	49.4446	52.5056	47.7547	44.5564	57.5767	37.88	29.7283	44.7133	181.238	170.272	189.227	121.242	6.06257	49.8737	15.0136	74.6292
+	4.94744	-1.76374	0.294484	Q16822	Phosphoenolpyruvate carboxykinase [GTP], mitochondrial OS=Homo sapiens OX=9606 GN=PCK2 PE=1 SV=4	PCK2	alcohol biosynthetic process;alcohol metabolic process;biological regulation;biosynthetic process;carbohydrate biosynthetic process;carbohydrate homeostasis;carbohydrate metabolic process;carboxylic acid metabolic process;cellular biosynthetic process;cellular carbohydrate biosynthetic process;cellular carbohydrate metabolic process;cellular chemical homeostasis;cellular glucose homeostasis;cellu…	binding;carbon-carbon lyase activity;carboxy-lyase activity;catalytic activity;cation binding;GTP binding;guanyl nucleotide binding;guanyl ribonucleotide binding;ion binding;lyase activity;metal ion binding;nucleotide binding;phosphoenolpyruvate carboxykinase (GTP) activity;phosphoenolpyruvate carboxykinase activity;purine nucleotide binding;purine ribonucleoside triphosphate binding;purine ribon…	cell part;cytoplasmic part;extracellular membrane-bounded organelle;extracellular organelle;extracellular region part;extracellular vesicular exosome;intracellular membrane-bounded organelle;intracellular organelle;intracellular organelle lumen;intracellular organelle part;intracellular part;membrane-bounded organelle;membrane-bounded vesicle;membrane-enclosed lumen;mitochondrial matrix;mitochond…	59.1283	0.000176208	134.274	110.974	117.039	104.454	35.7268	52.8125	66.5797	55.7015	465.544	387.263	369.186	385.923	43.5165	177.422	264.76	175.5
+	5.12167	-1.78413	0.29035	P13073	Cytochrome c oxidase subunit 4 isoform 1, mitochondrial OS=Homo sapiens OX=9606 GN=COX4I1 PE=1 SV=1	COX4I1	biosynthetic process;cellular biosynthetic process;cellular macromolecule metabolic process;cellular metabolic process;cellular nitrogen compound metabolic process;cellular process;electron transport chain;gene expression;generation of precursor metabolites and energy;macromolecule metabolic process;metabolic process;nitrogen compound metabolic process;nucleic acid metabolic process;nucleobase-co…	catalytic activity;cation transmembrane transporter activity;cytochrome-c oxidase activity;heme-copper terminal oxidase activity;hydrogen ion transmembrane transporter activity;inorganic cation transmembrane transporter activity;ion transmembrane transporter activity;monovalent inorganic cation transmembrane transporter activity;oxidoreductase activity;oxidoreductase activity, acting on a heme gr…	cell part;cytoplasmic part;extracellular membrane-bounded organelle;extracellular organelle;extracellular region part;extracellular vesicular exosome;intracellular membrane-bounded organelle;intracellular organelle;intracellular organelle part;intracellular part;membrane;membrane-bounded organelle;membrane-bounded vesicle;mitochondrial inner membrane;mitochondrial membrane;mitochondrial part;mito…	34.1652	0.0175898	21.0482	19.177	18.123	18.8234	57.796	245.127	81.237	35.9676	75.5229	57.6337	62.2151	75.8708	373.108	32.1634	186.49	66.5885
+	2.47417	-1.81575	0.284056	Q16698	2,4-dienoyl-CoA reductase, mitochondrial OS=Homo sapiens OX=9606 GN=DECR1 PE=1 SV=1	DECR1	carboxylic acid catabolic process;carboxylic acid metabolic process;catabolic process;cellular catabolic process;cellular component assembly;cellular component organization;cellular component organization or biogenesis;cellular ketone metabolic process;cellular lipid catabolic process;cellular lipid metabolic process;cellular metabolic process;cellular process;fatty acid beta-oxidation;fatty acid…	2,4-dienoyl-CoA reductase (NADPH) activity;binding;catalytic activity;coenzyme binding;cofactor binding;NADP binding;NADPH binding;nucleotide binding;oxidoreductase activity;oxidoreductase activity, acting on NADH or NADPH;oxidoreductase activity, acting on the CH-CH group of donors;oxidoreductase activity, acting on the CH-CH group of donors, NAD or NADP as acceptor	cell part;cytoplasm;cytoplasmic part;extracellular membrane-bounded organelle;extracellular organelle;extracellular region part;extracellular vesicular exosome;intracellular membrane-bounded organelle;intracellular organelle;intracellular organelle lumen;intracellular organelle part;intracellular part;membrane-bounded organelle;membrane-bounded vesicle;membrane-enclosed lumen;mitochondrial matrix…	30.5373	0.00199487	58.7635	49.0292	59.8078	48.3003	68.5021	75.8203	104.23	69.6349	142.351	157.65	133.739	451.682	94.7312	113.531	57.7878	124.327
+	3.39004	-1.88578	0.270598	P33993	DNA replication licensing factor MCM7 OS=Homo sapiens OX=9606 GN=MCM7 PE=1 SV=4	MCM7	biological regulation;biosynthetic process;cell cycle;cell cycle process;cell proliferation;cellular biosynthetic process;cellular macromolecule biosynthetic process;cellular macromolecule metabolic process;cellular metabolic process;cellular nitrogen compound metabolic process;cellular process;cellular response to chemical stimulus;cellular response to endogenous stimulus;cellular response to ep…	adenyl nucleotide binding;adenyl ribonucleotide binding;ATP binding;binding;catalytic activity;DNA binding;DNA helicase activity;helicase activity;hydrolase activity;hydrolase activity, acting on acid anhydrides;hydrolase activity, acting on acid anhydrides, in phosphorus-containing anhydrides;nucleic acid binding;nucleoside-triphosphatase activity;nucleotide binding;purine nucleotide binding;pur…	cell part;chromatin;chromosomal part;cytoplasm;cytoplasmic part;cytosol;intracellular organelle part;intracellular part;macromolecular complex;MCM complex;membrane;nuclear chromosome part;nuclear part;nucleoplasm;nucleoplasm part;organelle part;protein complex	16.4833	0.0463021	57.0264	53.1686	50.0641	46.6325	84.8922	115.687	56.6646	96.6965	117.899	247.283	232.164	206.84	125.711	190.177	22.0506	216.496
+	6.72605	-1.89005	0.269797	P16403;P10412;P16402	Histone H1.2 OS=Homo sapiens OX=9606 GN=HIST1H1C PE=1 SV=2	HIST1H1C;HIST1H1D;HIST1H1E	cellular component assembly;cellular component assembly at cellular level;cellular component organization;cellular component organization at cellular level;cellular component organization or biogenesis;cellular component organization or biogenesis at cellular level;cellular macromolecular complex assembly;cellular macromolecular complex subunit organization;cellular process;chromatin assembly;chr…	binding;chromatin binding;chromatin DNA binding;DNA binding;nucleic acid binding;structure-specific DNA binding	cell part;chromatin;chromosomal part;euchromatin;extracellular membrane-bounded organelle;extracellular organelle;extracellular region part;extracellular vesicular exosome;heterochromatin;intracellular membrane-bounded organelle;intracellular organelle;intracellular organelle part;intracellular part;macromolecular complex;membrane-bounded organelle;membrane-bounded vesicle;nuclear chromatin;nucle…	69.4268	1.99e-07	223.475	224.166	221.56	212.342	88.502	95.3283	99.7832	92.6766	846.835	808.704	786.126	876.167	82.9854	40.8265	73.9966	20.5676
+	6.03351	-1.89235	0.269367	P23588	Eukaryotic translation initiation factor 4B OS=Homo sapiens OX=9606 GN=EIF4B PE=1 SV=2	EIF4B	biological regulation;biosynthetic process;catabolic process;cell surface receptor linked signaling pathway;cellular biosynthetic process;cellular catabolic process;cellular macromolecule biosynthetic process;cellular macromolecule catabolic process;cellular macromolecule metabolic process;cellular metabolic process;cellular nitrogen compound metabolic process;cellular process;cellular protein me…	binding;nucleic acid binding;nucleotide binding;RNA binding;translation factor activity, nucleic acid binding;translation initiation factor activity	cell part;cytoplasmic part;cytosol;eukaryotic translation initiation factor 4F complex;intracellular part;macromolecular complex;protein complex	4.8586	0.00152657	64.9506	56.4957	73.5906	66.4444	9.59145	49.4939	51.4877	44.2193	223.342	229.038	286.275	246.79	72.6764	60.9439	14.3915	70.1317
+	6.6521	-2.00807	0.248606	P01011	Alpha-1-antichymotrypsin OS=Homo sapiens OX=9606 GN=SERPINA3 PE=1 SV=2	SERPINA3	acute inflammatory response;acute-phase response;anatomical structure homeostasis;biological regulation;defense response;digestive system process;epithelial structure maintenance;homeostatic process;inflammatory response;maintenance of gastrointestinal epithelium;multicellular organismal process;negative regulation of catalytic activity;negative regulation of endopeptidase activity;negative regul…	binding;DNA binding;endopeptidase inhibitor activity;endopeptidase regulator activity;enzyme inhibitor activity;enzyme regulator activity;nucleic acid binding;peptidase inhibitor activity;peptidase regulator activity;serine-type endopeptidase inhibitor activity	blood microparticle;cell part;extracellular membrane-bounded organelle;extracellular organelle;extracellular region;extracellular region part;extracellular space;extracellular vesicular exosome;intracellular;intracellular membrane-bounded organelle;intracellular organelle;intracellular part;membrane-bounded organelle;membrane-bounded vesicle;nucleus;organelle;vesicle	5.6777	0.00184815	50.2812	50.2522	53.6087	61.7255	23.8184	20.2992	11.1576	10.4187	223.282	218.615	216.616	219.524	15.7567	1.74347	49.6209	0
+	6.54642	-2.03709	0.243654	P11182	Lipoamide acyltransferase component of branched-chain alpha-keto acid dehydrogenase complex, mitochondrial OS=Homo sapiens OX=9606 GN=DBT PE=1 SV=3	DBT	amine catabolic process;amine metabolic process;branched chain family amino acid catabolic process;branched chain family amino acid metabolic process;carboxylic acid catabolic process;carboxylic acid metabolic process;catabolic process;cellular amine metabolic process;cellular amino acid catabolic process;cellular amino acid metabolic process;cellular catabolic process;cellular ketone metabolic p…	binding;catalytic activity;dihydrolipoyllysine-residue (2-methylpropanoyl)transferase activity;enzyme binding;protein binding;transferase activity;transferase activity, transferring acyl groups;transferase activity, transferring acyl groups other than amino-acyl groups;ubiquitin protein ligase binding	cell part;cytoplasmic part;dihydrolipoyl dehydrogenase complex;intracellular membrane-bounded organelle;intracellular non-membrane-bounded organelle;intracellular organelle;intracellular organelle lumen;intracellular organelle part;intracellular part;macromolecular complex;membrane-bounded organelle;membrane-enclosed lumen;mitochondrial alpha-ketoglutarate dehydrogenase complex;mitochondrial matr…	14.5728	0.00051851	31.3333	33.9679	38.532	34.1497	27.7853	34.3607	35.9903	42.9575	123.096	138.964	146.377	168.289	17.0474	80.3135	21.4811	59.307
+	4.56584	-2.06635	0.238762	Q00839	Heterogeneous nuclear ribonucleoprotein U OS=Homo sapiens OX=9606 GN=HNRNPU PE=1 SV=6	HNRNPU	biological regulation;cell differentiation;cellular developmental process;cellular macromolecule metabolic process;cellular metabolic process;cellular nitrogen compound metabolic process;cellular process;circadian regulation of gene expression;circadian rhythm;CRD-mediated mRNA stabilization;developmental process;gene expression;macromolecule metabolic process;metabolic process;mRNA metabolic pro…	adenyl nucleotide binding;adenyl ribonucleotide binding;ATP binding;binding;core promoter binding;DNA binding;nucleic acid binding;nucleotide binding;purine nucleotide binding;purine ribonucleoside triphosphate binding;purine ribonucleotide binding;regulatory region DNA binding;regulatory region nucleic acid binding;ribonucleotide binding;RNA binding;transcription regulatory region DNA binding	catalytic step 2 spliceosome;cell part;cell surface;CRD-mediated mRNA stability complex;cytoplasmic part;intracellular membrane-bounded organelle;intracellular organelle;intracellular organelle part;intracellular part;macromolecular complex;membrane;membrane-bounded organelle;nuclear part;nucleoplasm;nucleus;organelle;organelle part;protein complex;ribonucleoprotein complex;spliceosomal complex	203.577	3.42e-05	785.618	720.242	716.992	722.618	900.309	1502.91	1232.08	804.79	2398.36	4081.98	3162.32	3089.91	933.422	1308.99	1941.5	845.753
+	4.26074	-2.07607	0.23716	P11498	Pyruvate carboxylase, mitochondrial OS=Homo sapiens OX=9606 GN=PC PE=1 SV=2	PC	alcohol biosynthetic process;alcohol metabolic process;biological regulation;biosynthetic process;biotin metabolic process;carbohydrate biosynthetic process;carbohydrate metabolic process;carboxylic acid metabolic process;cellular amide metabolic process;cellular biosynthetic process;cellular carbohydrate biosynthetic process;cellular carbohydrate metabolic process;cellular ketone metabolic proce…	adenyl nucleotide binding;adenyl ribonucleotide binding;ATP binding;binding;biotin binding;biotin carboxylase activity;carboxylic acid binding;catalytic activity;cation binding;DNA binding;ion binding;ligase activity;ligase activity, forming carbon-carbon bonds;ligase activity, forming carbon-nitrogen bonds;metal ion binding;monocarboxylic acid binding;nucleic acid binding;nucleotide binding;puri…	cell part;cytoplasm;cytoplasmic part;cytosol;intracellular membrane-bounded organelle;intracellular organelle;intracellular organelle lumen;intracellular organelle part;intracellular part;membrane;membrane-bounded organelle;membrane-enclosed lumen;mitochondrial inner membrane;mitochondrial matrix;mitochondrial membrane;mitochondrial part;mitochondrion;organelle;organelle inner membrane;organelle …	14.4967	0.00151004	6.54066	3.3876	6.80881	6.38792	4.65661	0.398676	0.258194	0.519653	21.6926	22.0806	24.7296	27.2727	5.06517	0	1.39672	9.75998
+	6.99573	-2.08165	0.236244	P17022	Zinc finger protein 18 OS=Homo sapiens OX=9606 GN=ZNF18 PE=1 SV=2	ZNF18	biological regulation;biosynthetic process;cellular biosynthetic process;cellular macromolecule biosynthetic process;cellular macromolecule metabolic process;cellular metabolic process;cellular nitrogen compound metabolic process;cellular process;macromolecule biosynthetic process;macromolecule metabolic process;metabolic process;nitrogen compound metabolic process;nucleic acid metabolic process;…	binding;cation binding;DNA binding;ion binding;metal ion binding;nucleic acid binding;nucleic acid binding transcription factor activity;sequence-specific DNA binding RNA polymerase II transcription factor activity;sequence-specific DNA binding transcription factor activity	cell part;intracellular membrane-bounded organelle;intracellular organelle;intracellular part;membrane-bounded organelle;nucleus;organelle	8.8457	0.000339985	26.8085	25.2179	26.6332	25.0528	22.7581	6.71142	35.07	12.2266	100.974	106.948	114.054	124.684	1.02103	12.9146	8.21976	10.4127
+	1.31776	-2.1288	0.228647	Q14980	Nuclear mitotic apparatus protein 1 OS=Homo sapiens OX=9606 GN=NUMA1 PE=1 SV=2	NUMA1	cell cycle;cell cycle phase;cell cycle process;cell differentiation;cell division;cellular component organization;cellular component organization at cellular level;cellular component organization or biogenesis;cellular component organization or biogenesis at cellular level;cellular developmental process;cellular process;cytoskeleton organization;developmental process;epithelial cell differentiati…	structural molecule activity	apical part of cell;cell body;cell part;cell projection;chromosome;cytoplasm;cytoplasmic part;cytoskeletal part;cytosol;dendrite;extracellular membrane-bounded organelle;extracellular organelle;extracellular region part;extracellular vesicular exosome;Golgi apparatus part;Golgi membrane;intracellular membrane-bounded organelle;intracellular non-membrane-bounded organelle;intracellular organelle;i…	101.21	0.00989716	12.2212	6.06208	12.4769	46.3317	61.6917	54.7206	38.4306	166.148	219.181	32.213	37.334	63.0387	45.7851	187.15	518.268	225.425
+	0.858715	-2.15615	0.224355	P62820;P61006	Ras-related protein Rab-1A OS=Homo sapiens OX=9606 GN=RAB1A PE=1 SV=3	RAB1A;RAB8A	anatomical structure formation involved in morphogenesis;anatomical structure morphogenesis;autophagic vacuole assembly;autophagy;axonogenesis;biological adhesion;biological regulation;cargo loading into COPII-coated vesicle;cargo loading into vesicle;catabolic process;cell adhesion;cell cycle;cell cycle process;cell migration;cell morphogenesis;cell morphogenesis involved in differentiation;cell…	binding;catalytic activity;cytoskeletal protein binding;enzyme binding;GDP binding;GTP binding;GTPase activity;GTPase binding;guanyl nucleotide binding;guanyl ribonucleotide binding;hydrolase activity;hydrolase activity, acting on acid anhydrides;hydrolase activity, acting on acid anhydrides, in phosphorus-containing anhydrides;myosin binding;myosin V binding;nucleoside-triphosphatase activity;nu…	cell body;cell part;cell projection;centrosome;cilium;clathrin-coated vesicle;coated vesicle;cytoplasmic membrane-bounded vesicle;cytoplasmic part;cytoplasmic vesicle;cytoplasmic vesicle membrane;cytoplasmic vesicle part;cytoskeletal part;cytosol;dendrite;early endosome;endocytic vesicle;endocytic vesicle membrane;endoplasmic reticulum membrane;endoplasmic reticulum part;endosomal part;endosome;e…	37.4056	8.61e-05	1.32391	1.41682	0.515833	1.05027	187.964	147.96	107.715	203.859	4.29782	12.3684	16.8926	0	10.4711	28.9206	4.35394	3.43946
[truncated: 38 more rows]

## Sheet: 10 - HCC1954ME GO analysis
Accession	Description	Gene name	Abundance
P08729	Keratin, type II cytoskeletal 7 OS=Homo sapiens OX=9606 GN=KRT7 PE=1 SV=5	KRT7	886.973
P15531	Nucleoside diphosphate kinase A OS=Homo sapiens OX=9606 GN=NME1 PE=1 SV=1	NME1	189.289
Q7KZF4	Staphylococcal nuclease domain-containing protein 1 OS=Homo sapiens OX=9606 GN=SND1 PE=1 SV=1	SND1	188.199
Q15645	Pachytene checkpoint protein 2 homolog OS=Homo sapiens OX=9606 GN=TRIP13 PE=1 SV=2	TRIP13	56.7931
P61769	Beta-2-microglobulin OS=Homo sapiens OX=9606 GN=B2M PE=1 SV=1	B2M	120.236
P31949	Protein S100-A11 OS=Homo sapiens OX=9606 GN=S100A11 PE=1 SV=2	S100A11	61.3475
P17987	T-complex protein 1 subunit alpha OS=Homo sapiens OX=9606 GN=TCP1 PE=1 SV=1	TCP1	180.175
P18669	Phosphoglycerate mutase 1 OS=Homo sapiens OX=9606 GN=PGAM1 PE=1 SV=2	PGAM1;PGAM4	42.1426
P12236	ADP/ATP translocase 3 OS=Homo sapiens OX=9606 GN=SLC25A6 PE=1 SV=4	SLC25A6	82.6984
Q7L1T6	Cytochrome b5 reductase 4 OS=Homo sapiens OX=9606 GN=CYB5R4 PE=1 SV=1	CYB5R4	37.19
P00338	L-lactate dehydrogenase A chain OS=Homo sapiens OX=9606 GN=LDHA PE=1 SV=2	LDHA	591.155
[truncated: 62 more rows]

[truncated: 5 more sheets: 11 - MCF7 ME GO analysis, 12 - HCC1954 ME KEGG , 13 - MCF7 ME KEGG , 14 - Volcano plot FT, 15 - Data from Fig. 5]
